# Supplementary material for: Physically asymmetric division of the C. elegans zygote ensures invariably successful embryogenesis
Source: bioRxiv preprint, doi:10.1101/2021.01.04.425207, version 1 (2021-01-04)
Supplement: Supplementary File 2 [file 425207_file27.xlsx]

## Sheet: Annotation
	Individual sheets contain statistics for separate features (variables):
	Timing:		variable name in the source code	note
1	Cell cycle duration [min]		LifeTime
2	Time of birth [min]		StartTime	time 0 corresponds to ABa division
3	Time of division [min]		EndTime	time 0 corresponds to ABa division
	Movement:
4	Net migration [um]		netdis	length of the vector between cell position at birth and at the time of its divison
5	total trajectory [um]		totdis	length of the entire trajectory traveled by cell between its birth until next division
	Position:
6	Positional deviation [um]		pOV	euclidian distance of a given cell nucleus from the average position of that nucleus in control lin-5(ev571) embryos determined at anaphaphse onset
7	Anterior-posterior position [fraction of embryo length]		pAP
8	Dorso-ventral position		pDV
9	Left-right position		pLR
	Division angles:
10	Angular deviation		aMean	deviation from an average division orientation in lin-5(ev571) control embryos
11	Anterior posterior angle [degrees]		aAP
12	Dorso-Ventral angle [degrees]		aDV
13	Left-right angle [degrees]		aLR
	Column annotation:		note
	embryo groups are encoded in following way:
	WT	otherwise wild-type embryos expressing mCherry::H2B and GFP:PH
	C	control lin-5(ev571) embryos	upshifted at early 2-cell stage for 5 minutes
	EQ	alive and dead equalized embryos together	AB size between 48-53% of total embryo size (AB+P1 area)
	EA	equalized alive
	ED	equalized dead
	INV	inverted	AB size below 48%
	columns
	order	standard order of cells roughly as they appear in embryo	allows reordering cell back to standard sequence after filtering in Excel
	mean	average value
	sd	standard deviation
	EQ.over.C	ratio between values of equalized and control embryos	equivalent for other comparisons
	sign	asterisks-style encoding of significance for Welsh's t-test	values after Bonferroni-Hochberg correction were considered. p-value . <0.1; * < 0.05, ** <0.01, *** < 0.001
	vc	variation coefficient	adjusted for sample size
	n	number of embryos in which given cell was scored for the variable
	t.stat	t statistic value for each pairwise comparison
	p.val	non-adjusted p-value for Welsh's t-test
	p.adj	Bonferroni-Hochberg corrected p-value

## Sheet: Cell cycle Duration
	Order	WT.mean	C.mean	EQ.mean	EA.mean	ED.mean	INV.mean		EQ.over.C	EQ.C.sign	ED.over.EA	ED.EA.sign	INV.over.EA	INV.EA.sign		WT.sd	C.sd	EQ.sd	EA.sd	ED.sd	INV.sd		WT.vc	C.vc	EQ.vc	EA.vc	ED.vc	INV.vc		WT.n	C.n	EQ.n	EA.n	ED.n	INV.n		C.vs.WT.t.stat	C.vs.EA.t.stat	C.vs.ED.t.stat	C.vs.INV.t.stat	C.vs.EQ.t.stat	EA.vs.ED.t.stat	EA.vs.INV.t.stat		C.vs.WT.p.val	C.vs.EA.p.val	C.vs.ED.p.val	C.vs.INV.p.val	C.vs.EQ.p.val
AB	1
P1	2
ABa	3		24.0718	24.7928	24.1223	25.575			1.02995	n.s.	1.06022	n.s.					1.7669	1.31495	0.8417	1.39141				0.0760226	0.0540575	0.0361392	0.056672				7	13	7	6				-0.0682684	-1.71456		-0.947519	-2.23131				0.947135	0.114559		0.366423
ABp	4		24.4293	24.7783	24.3949	25.2257			1.01429	n.s.	1.03406	n.s.					1.65052	0.968228	0.669782	1.12498				0.069976	0.0398271	0.0284364	0.0464549				7	13	7	6				0.0511383	-1.02804		-0.513888	-1.58424				0.960481	0.32693		0.620749
EMS	5		27.3282	25.7582	25.2789	26.3175			0.942551	n.s.	1.04109	n.s.					1.66225	1.34535	1.48503	1.00023				0.0629977	0.0532341	0.060844	0.0395897				7	13	7	6				2.43253	1.34886		2.14854	-1.49637				0.0318167	0.207137		0.0563378
P2	6		31.8479	30.1678	30.0966	30.251			0.947249	n.s.	1.00513	n.s.					1.84958	1.36134	1.03721	1.77241				0.0601496	0.0459933	0.0356935	0.0610312				7	13	7	6				2.18503	1.58714		2.1145	-0.187651				0.0553611	0.141228		0.0617063
ABal	7	26.3865	26.1338	26.1633	26.1855	26.1474	24.8279		1.00113	n.s.	0.998543	n.s.	0.948153	n.s.		0.917165	1.15763	1.12837	1.11939	1.15497	0.940314		0.0356279	0.0449114	0.0433528	0.0432828	0.044566	0.039226		10	18	48	20	28	7		-0.63451	-0.139537	-0.038704	2.9147	-0.0925731	0.114852	3.12317		0.532118	0.889819	0.969338	0.0116679	0.92686
ABar	8	26.3865	26.0226	25.8248	25.7494	25.8786	25.1386		0.992398	n.s.	1.00502	n.s.	0.976276	n.s.		0.917165	1.05671	1.19733	1.12015	1.26702	0.951537		0.0356279	0.0411714	0.0466051	0.0440458	0.0493974	0.0392035		10	18	48	20	28	7		-0.951837	0.77332	0.4168	2.02079	0.652538	-0.372734	1.39383		0.351959	0.444394	0.679002	0.0659053	0.518388
ABpl	9	26.146	26.6183	25.8751	25.7603	25.957	25.4129		0.972078	n.s.	1.00764	n.s.	0.986512	n.s.		1.176	0.963831	1.16859	0.97951	1.29819	1.14794		0.0461028	0.0367123	0.0453982	0.0384993	0.0504596	0.0467849		10	18	48	20	28	7		1.08374	2.71886	1.97767	2.46126	2.62672	-0.598147	0.71486		0.294735	0.0100478	0.0544018	0.0348002	0.0124853
ABpr	10	26.3828	26.5114	26.0243	26.0085	26.0355	25.1386		0.981627	n.s.	1.00104	n.s.	0.96655	n.s.		1.37442	1.03088	1.24859	1.03043	1.40225	0.951537		0.0533979	0.0394244	0.0482278	0.040114	0.0543398	0.0392035		10	18	48	20	28	7		0.258343	1.50166	1.32353	3.16293	1.61013	-0.0768473	2.03683		0.799714	0.142009	0.192637	0.00828864	0.11591
MS	11	31.1555	29.7486	28.0107	27.8934	28.0944	26.4921		0.941581	**	1.00721	n.s.	0.949763	n.s.		1.20481	1.35844	1.53731	1.32552	1.69118	1.62904		0.0396375	0.0463355	0.055169	0.048115	0.0607335	0.0636877		10	17	48	20	28	7		-2.79326	4.18604	3.60361	4.66316	4.37505	-0.461179	2.05062		0.0109198	0.00019136	0.000867373	0.000983996	0.000123475
E	12	33.5688	31.3454	28.9672	28.6996	29.1583	27.7743		0.924127	***	1.01598	n.s.	0.967758	n.s.		1.86061	1.00356	1.90987	1.18485	2.29581	1.76242		0.0568124	0.0324871	0.0662757	0.0418004	0.0794392	0.0657214		10	17	48	20	28	7		-3.49174	7.35413	4.39648	5.03541	6.46718	-0.902229	1.29078		0.00437443	1.34161e-08	7.91546e-05	0.00114939	3.13905e-08
C	13	33.819	32.2832	30.9262	31.263	30.6856	30.0121		0.957966	**	0.981532	n.s.	0.959989	n.s.		0.922284	1.09343	1.40511	1.04799	1.58742	1.1662		0.027953	0.0343681	0.0456709	0.0339409	0.0521935	0.0402455		10	17	48	20	28	7		-3.89602	2.88277	3.98985	4.41487	4.06459	1.51668	2.5057		0.000793267	0.00683306	0.000258125	0.00113144	0.000249605
P3	14	45.612	41.8557	38.5674	38.9371	38.3165	34.8314		0.921437	***	0.98406	n.s.	0.894556	n.s.		2.46313	1.93757	2.39655	2.15346	2.55579	3.14776		0.0553518	0.0470149	0.0624698	0.0560337	0.0672976	0.0935988		10	16	47	19	28	7		-4.09522	4.21829	5.17393	5.46818	5.50478	0.898292	3.18705		0.000856865	0.000181723	7.45327e-06	0.000579299	4.62922e-06
ABala	15	31.8792	32.1311	32.6027	32.5442	32.649	33.0087		1.01468	n.s.	1.00322	n.s.	1.01427	n.s.		1.19747	1.63388	1.50545	1.0954	1.78732	0.542669		0.0385019	0.0516978	0.0464442	0.0341018	0.0553136	0.0171252		10	15	43	19	24	6		0.444207	-0.841307	-0.928591	-1.84194	-0.981927	-0.236553	-1.3867		0.661096	0.408689	0.360073	0.0813276	0.336418
ABalp	16	31.8792	31.0511	30.9319	30.8314	31.0114	31.4146		0.996161	n.s.	1.00584	n.s.	1.01892	n.s.		1.19747	1.35633	1.23877	1.13134	1.33625	1.63774		0.0385019	0.044363	0.040281	0.0371771	0.0435379	0.0543054		10	16	43	19	24	6		-1.62932	0.51449	0.0910558	-0.484906	0.30707	-0.478253	-0.813166		0.118095	0.610764	0.928017	0.641181	0.761343
ABara	17	31.3983	31.6251	32.2576	32.2024	32.3013	32.6192		1.02	n.s.	1.00307	n.s.	1.01294	n.s.		1.37217	1.15687	1.22392	0.97211	1.41115	2.01605		0.0447945	0.0371522	0.0381625	0.0305847	0.0441423	0.0643809		10	16	43	19	24	6		0.435069	-1.58077	-1.6565	-1.13945	-1.8375	-0.271331	-0.488689		0.669055	0.124609	0.106252	0.296109	0.0766429
ABarp	18	31.1615	30.7676	30.9802	31.0363	30.9359	31.7979		1.00691	n.s.	0.996766	n.s.	1.02454	n.s.		1.23465	1.26618	1.31267	1.25037	1.38505	2.1165		0.0406115	0.0417961	0.0426177	0.0408174	0.0452381	0.0693344		10	16	43	19	24	6		-0.783627	-0.628858	-0.396471	-1.11962	-0.567694	0.249198	-0.836587		0.442611	0.533926	0.694216	0.303164	0.574798
ABpla	19	30.9363	30.3793	30.7461	30.6358	30.8334	32.2717		1.01207	n.s.	1.00645	n.s.	1.0534	n.s.		0.846923	0.808237	1.05831	1.17063	0.977129	1.54669		0.0280608	0.0270205	0.0346212	0.0387141	0.0320207	0.0499241		10	16	43	19	24	6		-1.65996	-0.763037	-1.59937	-2.85429	-1.41824	-0.590829	-2.38406		0.113728	0.45105	0.118452	0.0287249	0.164929
ABplp	20	32.1198	31.3258	31.6793	31.6395	31.7109	31.785		1.01128	n.s.	1.00225	n.s.	1.0046	n.s.		1.29771	1.19372	1.305	1.16822	1.42811	0.952472		0.0414124	0.0387417	0.0414336	0.0374085	0.0455043	0.0312147		10	15	43	19	24	6		-1.5469	-0.768021	-0.907562	-0.925396	-0.963532	-0.180126	-0.308038		0.139025	0.448501	0.370537	0.373582	0.34397
ABpra	21	30.9363	30.653	31.1223	30.7385	31.4261	31.8612		1.01531	n.s.	1.02237	n.s.	1.03653	n.s.		0.846923	0.912004	1.18926	0.970239	1.27592	1.12998		0.0280608	0.0302174	0.0384348	0.0319797	0.0410234	0.0369435		10	16	43	19	24	6		-0.805311	-0.268247	-2.23359	-2.34802	-1.61083	-2.00719	-2.19204		0.429947	0.790201	0.0315135	0.048485	0.116205
ABprp	22	32.1178	31.7545	31.9246	31.8273	32.0016	32.5854		1.00536	n.s.	1.00548	n.s.	1.02382	n.s.		1.24532	1.40654	1.0926	0.773488	1.30295	1.16547		0.0397428	0.0449864	0.0344233	0.0246224	0.0411393	0.037257		10	16	43	19	24	6		-0.688041	-0.184871	-0.56056	-1.40443	-0.437188	-0.545246	-1.49287		0.498941	0.854994	0.579186	0.188108	0.666218
MSa	23	35.9573	36.2796	35.7153	35.3508	36.0006	33.8413		0.984447	n.s.	1.01838	n.s.	0.957297	n.s.		1.04126	1.32074	2.58209	1.7383	3.09733	1.78792		0.0296822	0.0371047	0.0727372	0.0498558	0.0869707	0.0550341		10	13	41	18	23	6		0.654407	1.68987	0.37575	2.98567	1.03572	-0.849531	1.80346		0.519963	0.101817	0.709559	0.0184048	0.306442
MSp	24	35.9573	36.2468	35.4925	34.8325	36.009	34.1821		0.97919	n.s.	1.03377	n.s.	0.981327	n.s.		1.04126	1.40561	2.87855	1.65246	3.51002	2.17208		0.0296822	0.0395246	0.0815976	0.0480989	0.0985359	0.0661921		10	13	41	18	23	6		0.567356	2.5664	0.286783	2.13149	1.26765	-1.419	0.67156		0.576491	0.015886	0.776151	0.0704568	0.211817
Ea	25	65.4347	66.0201	58.4077	58.7362	58.1934	52.4333		0.884695	***	0.990758	n.s.	0.892691	n.s.		2.28944	2.63319	3.96868	3.96663	4.04415	5.59675		0.0358629	0.0406517	0.068395	0.0686584	0.0702504	0.111188		10	13	38	15	23	6		0.569224	5.79053	7.01601	5.66413	7.81907	0.409179	2.51723		0.575353	5.30842e-06	4.88271e-08	0.00126753	6.86226e-09
Ep	26	69.7627	69.635	60.628	61.0926	60.325	55.2408		0.870654	***	0.987436	n.s.	0.904215	n.s.		2.81549	2.5321	4.59283	4.22081	4.88838	4.72539		0.041367	0.0370617	0.0762526	0.0702403	0.0819149	0.0891059		10	13	38	15	23	6		-0.112657	6.58891	7.52138	7.01133	8.79707	0.514387	2.64105		0.911525	9.36519e-07	1.01424e-08	0.000322698	9.6255e-11
Ca	27	39.556	39.9154	39.5679	39.3154	39.7326	37.7579		0.991295	n.s.	1.01061	n.s.	0.960384	n.s.		1.5181	1.22339	2.52387	1.92505	2.87802	3.54045		0.039338	0.031239	0.0642055	0.0497803	0.0732221	0.097674		10	13	38	15	23	6		0.611332	0.996898	0.265127	1.45316	0.653407	-0.535375	1.01901		0.549046	0.328757	0.792598	0.200193	0.516981
Cp	28	39.556	40.796	39.1728	39.3694	39.0446	37.2992		0.960213	n.s.	0.991751	n.s.	0.947415	n.s.		1.5181	1.6801	2.36287	1.91976	2.64594	2.69878		0.039338	0.0419751	0.0607159	0.0495755	0.0685037	0.0753698		10	13	38	15	23	6		1.85338	2.0969	2.4251	2.92311	2.6901	0.437883	1.71357		0.0783627	0.0458799	0.0208668	0.0227625	0.0116603
D	29	58.9993	56.6292	48.6844	49.7034	48.0198	43.2208		0.859704	***	0.966129	n.s.	0.869576	n.s.		2.60289	4.01515	4.00467	4.44068	3.64054	3.57895		0.0452203	0.0722659	0.082799	0.0908328	0.0766372	0.0862565		10	13	38	15	23	6		-1.71148	4.33311	6.38811	7.29869	6.16241	1.22429	3.49035		0.102064	0.000196091	1.60393e-06	1.58032e-05	4.29493e-06
P4	30	123.705	105.568	70.8759	74.8538	68.2816	51.33		0.67138	**	0.9122	n.s.	0.685737	.		6.21914	17.972	12.2607	13.1156	11.2039	8.44603		0.0515307	0.174111	0.174126	0.178137	0.165866	0.172771		10	11	38	15	23	5		-3.14638	4.80659	6.31867	8.2112	6.01006	1.59748	4.63709		0.00801469	0.000153785	1.99463e-05	1.06965e-06	4.64873e-05
ABalaa	31	43.8687	44.9908	44.3103	44.7254	44.0396	44.5945		0.984875	n.s.	0.984666	n.s.	0.997073	n.s.		1.1282	1.6205	1.78086	1.58526	1.88162	1.21734		0.0263605	0.0367112	0.040455	0.0360349	0.0431901	0.0286629		10	13	38	15	23	5		1.95537	0.4366	1.59439	0.561371	1.27367	1.20958	0.192185		0.0640751	0.66611	0.121959	0.587158	0.215663
ABalap	32	43.1335	43.6567	43.4968	43.5495	43.4624	43.199		0.996339	n.s.	0.998	n.s.	0.991951	n.s.		1.06835	1.19747	1.92741	1.568	2.16336	1.34968		0.0253876	0.0279568	0.0446031	0.036605	0.0503164	0.0328055		10	13	38	15	23	5		1.10428	0.204565	0.346717	0.664292	0.350414	0.143697	0.482298		0.282286	0.839528	0.730941	0.52906	0.728188
ABalpa	33	40.7338	41.8491	41.4285	41.5248	41.3657	40.2945		0.98995	n.s.	0.996169	n.s.	0.970373	n.s.		1.59237	1.64906	1.5775	1.38926	1.71656	0.770549		0.0400696	0.0401626	0.0383283	0.0340137	0.0419483	0.0200791		10	13	38	15	23	5		1.63957	0.557952	0.832346	2.71469	0.802539	0.313956	2.47334		0.116852	0.582124	0.412823	0.0159847	0.431651
ABalpp	34	41.6865	42.3804	41.117	41.4161	40.9219	40.2945		0.970189	n.s.	0.988068	n.s.	0.972919	n.s.		1.41604	1.85913	1.51194	1.03268	1.75076	0.770549		0.034818	0.0447113	0.0370135	0.0253498	0.0432479	0.0200791		10	13	38	15	23	5		1.0161	1.66122	2.30855	3.36341	2.21268	1.09313	2.57419		0.321147	0.113833	0.029979	0.00403886	0.0402751
ABaraa	35	41.4573	42.5468	43.0981	42.5208	43.4747	42.6675		1.01296	n.s.	1.02243	n.s.	1.00345	n.s.		1.72475	1.47762	1.84657	1.6936	1.87987	2.91531		0.0426432	0.0353972	0.0431276	0.0404937	0.0437107	0.0717426		10	13	38	15	23	5		1.59701	0.0433877	-1.63623	-0.08834	-1.08616	-1.62435	-0.106704		0.127882	0.965724	0.112169	0.933163	0.287431
ABarap	36	41.6977	42.409	42.2556	41.7949	42.556	42.658		0.996383	n.s.	1.01821	n.s.	1.02065	n.s.		1.80204	0.928076	1.37621	1.18594	1.43222	1.32275		0.0442971	0.0223048	0.0327829	0.0288481	0.0340207	0.0325587		10	13	38	15	23	5		1.13741	1.53498	-0.372894	-0.386029	0.450198	-1.77929	-1.29569		0.27645	0.136978	0.711596	0.713733	0.655687
ABarpa	37	43.357	43.4345	42.775	42.883	42.7046	43.6245		0.984817	n.s.	0.995841	n.s.	1.01729	n.s.		1.92406	1.17	1.88953	1.41876	2.17039	1.61127		0.0454866	0.0274551	0.0444643	0.0336358	0.0513758	0.0387818		10	13	38	15	23	5		0.11239	1.12701	1.31066	-0.240422	1.47738	0.306295	-0.917341		0.91211	0.270053	0.198766	0.818403	0.148738
ABarpp	38	44.5787	44.6419	43.4683	44.0105	43.1146	43.126		0.97371	n.s.	0.979644	n.s.	0.979903	n.s.		1.28385	1.58039	1.92236	1.63355	2.04592	1.61143		0.0295196	0.0360824	0.0445155	0.037736	0.0479688	0.0392338		10	13	38	15	23	5		0.105672	1.03795	2.49694	1.79717	2.18171	1.49334	1.05927		0.91685	0.308976	0.0181357	0.114297	0.0386897
ABplaa	39	40.7377	40.4435	42.3645	42.5216	42.262	41.7305		1.0475	**	0.993894	n.s.	0.981395	n.s.		1.20739	1.14588	1.678	1.65144	1.72398	1.89202		0.0303792	0.0288776	0.0398692	0.0394849	0.0412362	0.0476061		10	13	38	15	23	5		-0.592324	-3.90768	-3.78998	-1.4239	-4.59074	0.465536	0.834964		0.56063	0.000631052	0.000609412	0.211885	7.0479e-05
ABplap	40	40.018	40.6166	41.912	41.8784	41.934	41.771		1.03189	n.s.	1.00133	n.s.	0.997435	n.s.		1.69331	1.31516	1.88069	2.41847	1.49173	2.24803		0.0433715	0.0330027	0.0451676	0.0587122	0.0359599	0.0565089		10	13	38	15	23	5		0.923866	-1.74484	-2.74812	-1.07943	-2.72422	-0.0796365	0.0907482		0.368785	0.0948605	0.0104072	0.328842	0.0106575
ABplpa	41	40.986	41.8784	41.6747	42.241	41.3053	41.23		0.995134	n.s.	0.97785	n.s.	0.976067	n.s.		2.06487	1.53753	1.81145	1.76253	1.78339	0.827642		0.0516395	0.0374202	0.0437524	0.042421	0.0436451	0.0210775		10	13	38	15	23	5		1.1443	-0.58132	1.0129	1.14834	0.393462	1.59206	1.72344		0.26921	0.566032	0.319699	0.270557	0.697406
ABplpp	42	42.6375	42.9857	42.7189	42.88	42.6139	42.15		0.993795	n.s.	0.993796	n.s.	0.982977	n.s.		2.34108	1.42474	1.42506	1.48196	1.41019	1.54177		0.0562793	0.033782	0.0335784	0.0351367	0.0334518	0.0384071		10	13	38	15	23	5		0.414923	0.192209	0.754758	1.05158	0.582658	0.551279	0.925697		0.684484	0.849089	0.457497	0.328851	0.566379
ABpraa	43	40.4663	40.6093	41.2367	40.9962	41.3935	40.8045		1.01545	n.s.	1.00969	n.s.	0.995324	n.s.		1.7995	1.06834	1.89394	1.33511	2.19846	2.31972		0.0455809	0.0268135	0.0462307	0.0331094	0.0536885	0.0596921		10	13	38	15	23	5		0.22304	-0.851041	-1.43665	-0.180883	-1.46973	-0.692725	0.175359		0.826776	0.402559	0.16009	0.864047	0.149956
ABprap	44	39.7638	41.0135	41.5674	41.3445	41.7127	42.223		1.01351	n.s.	1.00891	n.s.	1.02125	n.s.		1.41346	1.78748	1.44608	1.04542	1.66297	1.33421		0.0364351	0.0444209	0.0350177	0.0257071	0.0403006	0.0331791		10	13	38	15	23	5		1.87221	-0.586449	-1.15581	-1.55917	-1.00993	-0.837942	-1.34144		0.0751925	0.564566	0.259355	0.15044	0.326144
ABprpa	45	40.959	42.3957	42.2872	42.9008	41.887	42.279		0.997441	n.s.	0.97637	n.s.	0.985507	n.s.		1.3635	0.823375	1.85514	1.72079	1.86537	2.21531		0.0341216	0.0197947	0.0441587	0.0407796	0.0450174	0.0550172		10	13	38	15	23	5		2.94455	-1.01104	1.12777	0.114776	0.287227	1.71674	0.572643		0.0107041	0.323675	0.267631	0.913637	0.775245
ABprpp	46	41.6885	42.3853	43.2898	43.5783	43.1017	42.279		1.02134	n.s.	0.989062	n.s.	0.970184	n.s.		1.84071	0.870587	1.63857	1.09725	1.91197	2.21531		0.0452578	0.0209348	0.0381002	0.0255985	0.0448417	0.0550172		10	13	38	15	23	5		1.10573	-3.20495	-1.53696	0.104252	-2.51881	0.974594	1.26096		0.290352	0.00357746	0.133846	0.921469	0.0159008
MSaa	47	41.6827	43.3392	42.4293	42.0619	42.6529	40.8355		0.979006	n.s.	1.01405	n.s.	0.970843	n.s.		1.70356	1.86534	3.22499	1.96489	3.82094	2.33703		0.0418914	0.0438681	0.0765222	0.0475485	0.0905559	0.0600919		10	13	37	14	23	5		2.2177	1.73265	0.722415	2.14687	1.22828	-0.619353	1.0485		0.0381366	0.095487	0.475047	0.074841	0.227121
MSap	48	45.7473	47.8484	46.2911	46.1657	46.3673	43.6745		0.967453	n.s.	1.00437	n.s.	0.946038	n.s.		2.19771	2.61413	4.2024	2.73429	4.94616	1.57222		0.0492413	0.0556843	0.0913955	0.0602854	0.107833	0.0377986		10	13	37	14	23	5		2.09209	1.63459	1.17478	4.13267	1.55502	-0.15952	2.45657		0.0488902	0.114679	0.248262	0.00130518	0.129129
MSpa	49	42.1925	42.6722	42.335	42.1812	42.4287	40.3695		0.992099	n.s.	1.00587	n.s.	0.957048	n.s.		1.74814	0.977042	2.99283	2.38801	3.35605	2.8507		0.0424684	0.0233368	0.0711716	0.057624	0.0799584	0.074146		10	13	37	14	23	5		0.779156	0.708054	0.324539	1.76674	0.600228	-0.261217	1.27078		0.44956	0.488239	0.747948	0.145969	0.551182
MSpp	50	45.7377	45.9945	46.2888	45.2366	46.9292	44.192		1.0064	n.s.	1.03742	n.s.	0.976907	n.s.		2.29539	1.36063	4.35367	2.49435	5.11925	2.04813		0.0514406	0.0301512	0.0946901	0.0561246	0.11027	0.0486635		10	13	37	14	23	5		0.313883	0.989366	-0.825558	1.81956	-0.363656	-1.34491	0.922126		0.758315	0.334076	0.416272	0.123932	0.71772
Caa	51	51.742	52.5812	49.1395	51.005	48.0039	46.9905		0.934545	*	0.94116	n.s.	0.921291	n.s.		2.61832	2.52236	2.99474	2.56655	2.68707	2.37389		0.0518684	0.0490611	0.0613555	0.0512181	0.0565846	0.0530445		10	11	37	14	23	5		0.746434	1.53896	4.84561	4.28098	3.79893	3.3885	3.17617		0.464713	0.138207	8.64754e-05	0.00247533	0.00119409
Cap	52	61.5438	60.4137	57.6823	59.2437	56.6887	52.3395		0.954789	n.s.	0.956872	n.s.	0.883461	n.s.		2.80318	4.25022	3.66851	3.43748	3.52922	5.33838		0.0466865	0.0719509	0.0640402	0.0590588	0.0629637	0.107095		10	11	36	14	22	5		-0.725238	0.741998	2.50665	2.97985	1.92368	2.15161	2.699		0.477933	0.467139	0.0225606	0.0227062	0.0737784
Cpa	53	49.3287	49.233	48.0436	48.9267	47.506	47.2		0.975842	n.s.	0.970964	n.s.	0.964709	n.s.		2.16278	2.6729	2.70714	3.10964	2.34092	5.37018		0.0449404	0.055422	0.0567283	0.0646921	0.0498118	0.119464		10	12	37	14	23	5		-0.092904	0.270076	1.89141	0.805922	1.33525	1.47395	0.679433		0.926905	0.789411	0.0731667	0.457966	0.197657
Cpp	54	57.0132	58.4829	56.7604	58.2378	55.8203	53.8005		0.970547	n.s.	0.958488	n.s.	0.923807	n.s.		2.05357	3.82273	3.44956	3.88721	2.84557	5.45018		0.0369196	0.0668504	0.0611961	0.067939	0.0515567	0.106369		10	11	36	14	22	5		1.1109	0.157947	2.04423	1.73668	1.3373	2.00949	1.67473		0.283433	0.875953	0.0580415	0.134202	0.200638
ABalaaa	55	47.918	50.7238	51.5351	51.9142	51.2824	51.6194		1.016	n.s.	0.98783	n.s.	0.994321	n.s.		2.28144	2.72777	1.79253	2.13758	1.52471	0.887202		0.0488016	0.0549992	0.0350312	0.0419105	0.0300856	0.0182616		10	11	35	14	21	4		2.56459	-1.18878	-0.629681	-0.958419	-0.925703	0.955632	0.407633		0.0190201	0.249453	0.539522	0.355341	0.371687
ABalaap	56	48.4027	51.6653	51.7717	52.101	51.5521	50.9844		1.00206	n.s.	0.989464	n.s.	0.978567	n.s.		2.0288	2.4222	2.83696	3.09972	2.70375	1.94615		0.0429628	0.047948	0.055189	0.0605567	0.0530714	0.0405572		10	11	35	14	21	4		3.35618	-0.394575	0.120521	0.559649	-0.121798	0.539709	0.873785		0.00333787	0.696792	0.905139	0.593939	0.90431
ABalapa	57	45.7493	49.7968	49.5264	49.66	49.4373	49.3819		0.994569	n.s.	0.995517	n.s.	0.9944	n.s.		2.54557	2.59155	2.40474	1.80935	2.77163	2.97672		0.0570329	0.0532253	0.0489015	0.0370853	0.056731	0.0640471		10	11	35	14	21	4		3.60793	0.148931	0.36381	0.246843	0.307036	0.2875	0.177699		0.0018908	0.883342	0.719524	0.815293	0.762825
ABalapp	58	46.74	49.9616	50.129	49.9345	50.2587	49.3		1.00335	n.s.	1.00649	n.s.	0.987293	n.s.		2.61645	2.4588	2.16891	1.44219	2.56924	1.36076		0.0573784	0.0503323	0.0435756	0.0293974	0.0517289	0.0293267		10	11	35	14	21	4		2.89991	0.0324765	-0.319615	0.657531	-0.202396	-0.476529	0.811409		0.00935339	0.974513	0.752383	0.525559	0.842287
ABalpaa	59	45.9765	47.2407	48.1851	48.8889	47.716	48.1213		1.01999	n.s.	0.976009	n.s.	0.984298	n.s.		2.91713	1.88484	2.32378	2.28235	2.28389	1.81355		0.0650345	0.0408055	0.0485704	0.047518	0.0484341	0.0400426		10	11	35	14	21	4		1.16678	-1.977	-0.628796	-0.82285	-1.36713	1.48904	0.702423		0.261324	0.0601945	0.535385	0.444429	0.186415
ABalpap	60	45.2662	46.5744	46.2659	46.0335	46.4209	47.4331		0.993377	n.s.	1.00842	n.s.	1.03041	n.s.		2.76589	1.74307	1.6064	1.16124	1.85669	0.951331		0.0626302	0.0382761	0.0349689	0.0256765	0.040473	0.0213098		10	11	35	14	21	4		1.282	0.886284	0.231285	-1.21142	0.52145	-0.759183	-2.46437		0.219403	0.388098	0.81927	0.252988	0.609321
ABalppa	61	48.4128	48.7842	49.986	50.3415	49.749	49.3		1.02463	n.s.	0.988232	n.s.	0.979312	n.s.		2.81152	2.73464	2.14541	1.84867	2.33579	1.36076		0.0595259	0.0573298	0.0432268	0.0373784	0.0475104	0.0293267		10	11	35	14	21	4		0.306357	-1.62005	-0.995323	-0.482482	-1.33421	0.83454	1.23858		0.762719	0.123834	0.332916	0.638838	0.203303
ABalppp	62	45.0562	46.135	46.5827	46.7666	46.4601	46.3362		1.0097	n.s.	0.993447	n.s.	0.990799	n.s.		1.85563	2.07237	2.51064	2.7942	2.3667	2.72545		0.0422143	0.0459405	0.0542814	0.0608147	0.051547	0.0624952		10	11	35	14	21	4		1.25848	-0.648624	-0.40103	-0.134243	-0.592703	0.33754	0.276924		0.223464	0.523019	0.692104	0.899213	0.559991
ABaraaa	63	47.2118	49.5521	50.4119	50.8479	50.1212	51.1381		1.01735	n.s.	0.985708	n.s.	1.00571	n.s.		2.88209	2.1948	2.62459	2.63563	2.6407	2.43714		0.0625722	0.0452994	0.0524347	0.0527592	0.0533135	0.0506366		10	11	35	14	21	4		2.07793	-1.34068	-0.648477	-1.14374	-1.0791	0.798531	-0.206202		0.0533773	0.193177	0.52283	0.305485	0.293495
ABaraap	64	45.274	46.1565	48.6791	49.5323	48.1103	48.0925		1.05465	**	0.971291	n.s.	0.970932	n.s.		2.90416	1.35953	2.11254	2.1604	1.92451	2.78854		0.0657499	0.0301243	0.0437072	0.0443949	0.0404783	0.0616069		10	11	35	14	21	4		0.877493	-4.76741	-3.32929	-1.33216	-4.64027	1.9917	0.954094		0.396775	9.15741e-05	0.0025192	0.26223	8.36744e-05
ABarapa	65	46.977	47.8768	49.2928	48.9846	49.4982	49.8344		1.02958	n.s.	1.01049	n.s.	1.01735	n.s.		2.29318	2.56571	2.44451	2.73487	2.2773	1.97347		0.0500353	0.0548079	0.0499459	0.0568282	0.0465554	0.0420756		10	11	35	14	21	4		0.848574	-1.04092	-1.7635	-1.5613	-1.61456	-0.581123	-0.692013		0.406684	0.309111	0.0944228	0.162271	0.125791
ABarapp	66	47.1965	50.5946	51.0767	51.073	51.0792	51.7537		1.00953	n.s.	1.00012	n.s.	1.01333	n.s.		2.79248	2.40992	1.77811	1.88157	1.75317	3.50374		0.0606464	0.0487146	0.0350611	0.0374988	0.0347311	0.0719316		10	11	35	14	21	4		2.97145	-0.541355	-0.590184	-0.611183	-0.613153	-0.00992918	-0.373521		0.008206	0.594691	0.563462	0.573459	0.549894
ABarpaa	67	42.6602	44.6553	46.0555	45.7392	46.2769	47.5969		1.03135	n.s.	1.01175	n.s.	1.04061	n.s.		2.29422	1.99683	2.51681	2.62735	2.4806	3.83399		0.0551232	0.0457329	0.0550492	0.0584677	0.0542735	0.0855858		10	11	34	14	20	4		2.11616	-1.17187	-1.98079	-1.46396	-1.89007	-0.600778	-0.909908		0.0485377	0.253253	0.0588169	0.224415	0.0724856
ABarpap	68	45.0775	47.0322	48.0122	47.7977	48.1552	48.7563		1.02084	n.s.	1.00748	n.s.	1.02005	n.s.		1.3036	2.77503	2.17822	1.94812	2.35487	2.26646		0.0296422	0.0603438	0.0456922	0.0414853	0.0494838	0.0493908		10	11	35	14	21	4		2.09563	-0.776818	-1.1437	-1.22392	-1.07208	-0.488663	-0.768604		0.0541176	0.447786	0.267974	0.263016	0.301702
ABarppa	69	44.325	45.0508	47.3652	47.2702	47.4285	49.4106		1.05137	*	1.00335	n.s.	1.04528	n.s.		1.70835	1.74362	2.14463	2.25372	2.12298	4.09848		0.0395049	0.0395831	0.0456021	0.0485287	0.0452946	0.0881316		10	11	35	14	21	4		0.962808	-2.77607	-3.39331	-2.06081	-3.62428	-0.208334	-1.0021		0.347815	0.0107442	0.00237286	0.120533	0.00164698
ABarppp	70	45.2797	45.7542	47.61	47.7788	47.4975	48.0681		1.04056	n.s.	0.994113	n.s.	1.00606	n.s.		2.73195	1.83237	2.16416	2.46255	1.99678	1.97942		0.0618432	0.0409583	0.0457806	0.052461	0.0425403	0.0437532		10	11	35	14	21	4		0.462693	-2.35607	-2.47753	-2.04142	-2.80073	0.356367	-0.243436		0.650002	0.0273823	0.0213717	0.0965255	0.0111869
ABplaaa	71	46.263	49.2023	50.8263	50.4404	51.0835	52.9619		1.03301	n.s.	1.01275	n.s.	1.04999	n.s.		2.58443	2.21808	2.14804	2.0185	2.24096	3.36833		0.0572604	0.0461054	0.0425642	0.0407321	0.0443909	0.067574		10	11	35	14	21	4		2.78334	-1.441	-2.27063	-2.07473	-2.13407	-0.883158	-1.42579		0.012323	0.164648	0.034027	0.106815	0.0483137
ABplaap	72	43.6035	45.7468	46.6361	47.1786	46.2744	46.365		1.01944	n.s.	0.980834	n.s.	0.982755	n.s.		2.09803	1.63011	2.39553	2.33386	2.42316	3.30402		0.0493189	0.0364431	0.0517334	0.050352	0.0529884	0.075715		10	11	35	14	21	4		2.59584	-1.80298	-0.730807	-0.358663	-1.39644	1.10576	0.460747		0.0188508	0.0846531	0.470996	0.740163	0.174947
ABplapa	73	44.3693	48.128	48.1512	47.2503	48.7519	48.1019		1.00048	n.s.	1.03178	n.s.	1.01802	n.s.		1.46428	1.39581	2.3322	2.01408	2.37966	2.17502		0.0338273	0.0296612	0.0487809	0.043387	0.0493926	0.0480429		10	11	35	14	21	4		6.00698	1.28455	-0.933484	0.0223647	-0.0403858	-2.00773	-0.70183		9.693e-06	0.211895	0.358155	0.983244	0.968065
ABplapp	74	46.7345	47.7686	48.962	48.6935	49.141	49.2713		1.02498	n.s.	1.00919	n.s.	1.01187	n.s.		1.46522	1.7186	2.85576	2.40559	3.16522	1.45876		0.0321359	0.0367952	0.0587428	0.0502849	0.0651777	0.0314571		10	11	35	14	21	4		1.4877	-1.12004	-1.58936	-1.67945	-1.68512	-0.474236	-0.594218		0.153294	0.274337	0.122498	0.141628	0.102864
ABplpaa	75	47.7065	49.6609	49.0703	49.3934	48.8549	48.0588		0.988107	n.s.	0.989099	n.s.	0.97298	n.s.		2.5438	1.99041	2.21561	1.90011	2.42418	1.6314		0.054655	0.0409909	0.0454743	0.0391558	0.0502107	0.0360676		10	11	35	14	21	4		1.94736	0.340329	1.00751	1.58209	0.834923	0.734288	1.38897		0.0681517	0.736971	0.323637	0.160561	0.414425
ABplpap	76	45.9995	47.809	47.6325	47.5173	47.7093	47.4237		0.996309	n.s.	1.00404	n.s.	0.998031	n.s.		1.68278	1.67821	2.32578	1.96853	2.58098	1.98333		0.0374971	0.0359001	0.0491764	0.0421673	0.0547421	0.0444352		10	11	35	14	21	4		2.46416	0.399525	0.13164	0.346003	0.275379	-0.249072	0.0833538		0.0235544	0.693224	0.896198	0.744376	0.78546
ABplppa	77	49.598	53.547	52.0534	52.2655	51.912	52.9331		0.972106	n.s.	0.993237	n.s.	1.01277	n.s.		2.76536	2.57695	2.19471	1.80686	2.45232	3.39441		0.0571494	0.0492187	0.0424638	0.0351881	0.0478024	0.0681343		10	11	35	14	21	4		3.37581	1.40087	1.73305	0.328873	1.73477	0.490402	-0.378371		0.00327401	0.178998	0.0988406	0.757543	0.10348
ABplppp	78	46.9635	49.6572	49.4304	49.3798	49.4642	49.2619		0.995432	n.s.	1.00171	n.s.	0.997612	n.s.		2.49307	2.24619	1.88312	1.49977	2.13622	3.06227		0.0544125	0.0462619	0.0383686	0.0309144	0.0437014	0.0660482		10	11	35	14	21	4		2.59179	0.352541	0.234816	0.23614	0.303095	-0.137251	0.0744983		0.0182827	0.728853	0.816796	0.824297	0.766066
ABpraaa	79	47.9333	50.4203	50.7051	50.7286	50.6895	51.1863		1.00565	n.s.	0.999228	n.s.	1.00902	n.s.		1.72241	2.33289	2.14587	2.59939	1.85352	3.55679		0.0368319	0.0473205	0.042623	0.0521561	0.0370015	0.0738303		10	11	35	14	21	4		2.79558	-0.31188	-0.33175	-0.400522	-0.359917	0.0487071	-0.239695		0.0118262	0.757999	0.744184	0.709326	0.723705
ABpraap	80	45.0525	46.0561	47.7785	48.4898	47.3043	47.515		1.0374	n.s.	0.975552	n.s.	0.979898	n.s.		1.75586	2.1067	2.70016	3.47388	1.99	2.03637		0.039948	0.0467817	0.0569179	0.0729209	0.0425689	0.0455361		10	11	35	14	21	4		1.18956	-2.16339	-1.62217	-1.21568	-2.20205	1.15661	0.707401		0.24897	0.0417455	0.120897	0.273374	0.0387995
ABprapa	81	45.0562	47.9082	49.3536	49.0755	49.539	47.515		1.03017	n.s.	1.00945	n.s.	0.968203	n.s.		2.17456	2.18956	2.27586	2.11928	2.4074	2.03637		0.0494697	0.0467419	0.0464427	0.0439552	0.0491747	0.0455361		10	11	35	14	21	4		2.99182	-1.34188	-1.9329	0.324049	-1.89163	-0.600029	1.33931		0.00754731	0.193783	0.0660924	0.757367	0.0753488
ABprapp	82	46.9885	49.4954	49.6352	49.2696	49.879	48.665		1.00283	n.s.	1.01237	n.s.	0.987729	n.s.		1.92836	3.18724	1.89101	2.21952	1.64954	0.961544		0.0420649	0.0658582	0.0383703	0.0458529	0.0334646	0.0209933		10	11	35	14	21	4		2.20264	0.199976	-0.373823	0.772803	-0.138073	-0.878346	0.791784		0.0419971	0.843851	0.714619	0.453533	0.892419
ABprpaa	83	47.689	49.162	49.711	49.3849	49.9284	47.5681		1.01117	n.s.	1.01101	n.s.	0.963212	n.s.		2.11577	2.65368	2.54697	2.1993	2.78567	3.90203		0.0454752	0.0552051	0.0516016	0.0453291	0.0564576	0.0871573		10	11	35	14	21	4		1.41224	-0.224552	-0.762757	0.755832	-0.604285	-0.642763	0.891606		0.174297	0.82468	0.453964	0.49124	0.554009
ABprpap	84	46.2612	49.063	47.8734	48.3571	47.551	46.88		0.975755	n.s.	0.983328	n.s.	0.969453	n.s.		2.58009	2.14438	2.19626	2.54454	1.92834	2.12089		0.0571665	0.0447001	0.046204	0.0535594	0.0410359	0.0480684		10	11	35	14	21	4		2.69131	0.752179	1.96	1.7576	1.59549	1.00809	1.17255		0.0151254	0.459622	0.0651545	0.134595	0.128881
ABprppa	85	50.32	52.6177	52.5611	52.601	52.5345	52.3075		0.998924	n.s.	0.998735	n.s.	0.99442	n.s.		2.19307	2.90177	3.2049	2.73727	3.54813	2.3179		0.0446721	0.0564015	0.0614103	0.0529677	0.0683432	0.0470824		10	11	35	14	21	4		2.05805	0.0146272	0.0712183	0.213607	0.0549983	0.0624512	0.214151		0.0540119	0.988468	0.943806	0.837173	0.956734
ABprppp	86	46.977	49.3273	49.6793	49.2922	49.9374	48.7563		1.00714	n.s.	1.01309	n.s.	0.989127	n.s.		2.47336	2.56341	2.2621	2.26289	2.27942	2.26646		0.0539667	0.0531484	0.0458593	0.0467275	0.046189	0.0493908		10	11	35	14	21	4		2.13743	0.0357695	-0.663797	0.41632	-0.408237	-0.823967	0.417252		0.0458359	0.971818	0.515044	0.691547	0.688783
Eal	87	71.3658	74.0871	64.7737	65.351	64.3696	58.265		0.874292	***	0.984983	n.s.	0.89157	n.s.		3.36143	3.72769	6.19492	2.93454	7.76822	10.1912		0.048279	0.0517127	0.0963426	0.0457061	0.12219	0.185843		10	9	34	14	20	4		1.6642	5.94541	4.54998	3.01665	5.69678	0.514907	1.37443		0.115227	3.32068e-05	0.000103834	0.0491422	1.13498e-05
Ear	88	72.3115	74.1133	65.0214	65.6423	64.5867	60.8775		0.877325	***	0.983919	n.s.	0.927412	n.s.		3.81299	2.80311	6.29788	4.6099	7.33933	9.41507		0.0540483	0.0388725	0.0975708	0.0714816	0.115056	0.164322		10	9	34	14	20	4		1.18116	5.47828	5.04457	2.75782	6.36619	0.514379	0.979189		0.254384	1.96251e-05	2.79404e-05	0.0644891	4.69301e-07
Epl	89	74.3894	75.3921	66.0681	67.2917	65.2117	59.8869		0.876328	**	0.969089	n.s.	0.889959	n.s.		4.35732	4.9538	5.91705	3.81695	6.99755	11.5952		0.0602015	0.0675323	0.0902183	0.0577353	0.108646	0.20572		9	9	34	14	20	4		0.455909	4.17337	4.47519	2.57211	4.81073	1.1136	1.2579		0.654681	0.000935785	0.000198145	0.0706056	0.000243159
Epr	90	75.1978	75.4224	66.4629	66.7111	66.2892	59.4631		0.881208	**	0.993675	n.s.	0.891353	n.s.		4.07398	4.50986	5.22927	3.35176	6.30322	8.86604		0.0558699	0.0614557	0.079258	0.0511401	0.0962753	0.15842		8	9	34	14	20	4		0.107895	4.97807	4.43218	3.4094	5.11838	0.252644	1.6026		0.91551	0.000219248	0.000224179	0.0303948	0.000147263
Da	91	66.4819	68.5132	72.3212	72.681	72.0693	63.5438		1.05558	n.s.	0.991585	n.s.	0.874283	n.s.		3.68067	3.49493	5.27452	5.52301	5.22369	9.97544		0.0570936	0.0526051	0.0734682	0.0773467	0.0733875	0.166797		8	8	34	14	20	4		1.13197	-2.16507	-2.09143	0.9671	-2.48667	0.324937	1.75663		0.276715	0.0428641	0.0498734	0.397585	0.0246689
Dp	92	67.3791	69.2018	71.663	71.1351	72.0326	62.4994		1.03557	n.s.	1.01262	n.s.	0.878601	n.s.		4.67879	2.4924	5.43738	4.66708	6.00813	9.69116		0.0716098	0.0371419	0.0764322	0.0667802	0.0844511	0.164751		8	8	34	14	20	4		0.972512	-1.26589	-1.7619	1.36089	-1.91834	-0.48959	1.72591		0.352313	0.22012	0.0899019	0.261467	0.0666285
MSaaa	93	46.49	49.1508	48.0616	48.0765	48.0512	47.515		0.977839	n.s.	0.999472	n.s.	0.98832	n.s.		2.10537	2.09642	1.88972	1.81867	1.9847	2.03637		0.0464188	0.0437191	0.0396079	0.0385041	0.0418201	0.0455361		10	10	34	14	20	4		2.83204	1.30689	1.37842	1.34639	1.47608	0.0385314	0.497703		0.0110505	0.207949	0.185705	0.228915	0.162692
MSaap	94	46.721	49.779	48.2596	47.9743	48.4593	48.15		0.969478	n.s.	1.01011	n.s.	1.00366	n.s.		2.45013	1.63409	2.7441	2.85027	2.7236	2.64976		0.0537528	0.0336476	0.0572792	0.0604734	0.0569064	0.0584709		10	10	34	14	20	4		3.28349	1.96053	1.65221	1.14546	2.17383	-0.497329	-0.114976		0.00478273	0.0631895	0.110145	0.316615	0.0392508
MSapa	95	48.863	52.5795	51.4156	51.4173	51.4144	49.3819		0.977864	n.s.	0.999944	n.s.	0.960415	n.s.		2.21418	2.15056	2.28532	2.15215	2.43713	2.97672		0.0464468	0.0420373	0.0447846	0.042604	0.0480254	0.0640471		10	9	33	14	19	4		3.70884	1.26457	1.28158	1.93561	1.41965	0.0035595	1.27559		0.00176133	0.22287	0.216459	0.117602	0.178604
MSapp	96	50.0543	53.9266	51.6854	51.6986	51.6757	51.7925		0.958439	n.s.	0.999557	n.s.	1.00182	n.s.		2.03838	2.65676	2.16681	2.49461	1.96268	3.12701		0.0417415	0.0506347	0.0422407	0.0491147	0.0384805	0.0641492		10	9	33	14	19	4		3.53532	2.00996	2.2657	1.18767	2.32837	0.0284483	-0.0552612		0.00300259	0.061184	0.04226	0.287911	0.039837
MSpaa	97	47.8645	50.6384	49.0877	48.8303	49.2679	46.9712		0.969376	n.s.	1.00896	n.s.	0.961929	n.s.		3.32769	2.15868	2.72196	2.8066	2.71953	2.82798		0.0712611	0.043695	0.0558587	0.058503	0.0558888	0.0639695		10	10	34	14	20	4		2.2115	1.78282	1.49916	2.33558	1.87518	-0.453192	1.16144		0.0424715	0.0885317	0.147856	0.0727657	0.0768225
MSpap	98	46.4575	49.8445	48.4998	47.8797	48.9339	45.1044		0.973022	n.s.	1.02202	n.s.	0.942035	n.s.		2.74229	2.24584	2.72044	2.73765	2.69153	1.91808		0.0605037	0.0461834	0.0565042	0.0581987	0.055691	0.0451832		10	10	34	14	20	4		3.0217	1.92689	0.978207	3.97204	1.58248	-1.11269	2.30075		0.00756737	0.0673211	0.338926	0.0061777	0.131391
MSppa	99	49.8445	52.3432	51.075	50.2639	51.6727	49.9256		0.975773	n.s.	1.02803	n.s.	0.99327	n.s.		2.02386	2.21034	2.82387	2.95452	2.64257	2.16068		0.0416186	0.0432836	0.0557075	0.0598298	0.0518134	0.0459829		10	10	33	14	19	4		2.6365	1.9717	0.724572	1.8788	1.484	-1.41519	0.252787		0.016833	0.0613963	0.476512	0.111867	0.154374
MSppp	100	50.0485	54.2598	51.7003	50.5144	52.5117	50.5319		0.952829	*	1.03954	n.s.	1.00035	n.s.		2.14717	1.97989	2.31851	2.49678	1.84151	1.95804		0.0439743	0.0374013	0.0451955	0.0503775	0.03553	0.0411705		10	10	32	13	19	4		4.55968	4.01199	2.31443	3.20791	3.42034	-2.46225	-0.0145854		0.000246615	0.000633258	0.0331972	0.0200695	0.00316534
Caaa	101	57.9411	56.882	54.7592	55.4098	54.3765	54.1744		0.96268	n.s.	0.981352	n.s.	0.977705	n.s.		3.44225	4.2232	3.57759	4.24817	3.19798	3.26195		0.0615313	0.0779573	0.0659382	0.078585	0.0596768	0.0639754		7	5	27	10	17	4		-0.461785	0.635217	1.22716	1.08503	1.056	0.666107	0.584654		0.657228	0.542717	0.270343	0.313856	0.338228
Caap	102	76.5994	73.7575	70.9139	71.7314	70.4738			0.961447	n.s.	0.982467	n.s.				1.51765	2.76403	3.93627	4.19032	3.89274			0.0210512	0.0398167	0.0562015	0.0605031	0.0562989			4	4	20	7	13			-1.80249	0.963882	1.87241		1.73546	0.656131			0.135615	0.361363	0.102622		0.135252
Capa	103				82.282	83.9461					1.02022	n.s.							6.09788	5.64242						0.077815	0.0693152						5	8								-0.492516
Capp	104	74.3325	76.3575	73.62	73.015	74.1494			0.964149	n.s.	1.01554	n.s.				1.71397	4.78692	4.7579	5.75795	4.02134			0.0244993	0.0666091	0.0657049	0.0816762	0.0559277			4	4	15	7	8			0.796536	1.03324	0.793157		1.01752	-0.436397			0.473016	0.333814	0.462247		0.358204
Cpaa	105	56.3678	55.0876	53.375	53.0265	53.5667	60.4906		0.968912	n.s.	1.01019	n.s.	1.14076	n.s.		3.69122	3.23774	2.65079	2.39952	2.82053	14.1544		0.0675309	0.0606111	0.0500639	0.0462797	0.0533126	0.248617		8	8	31	11	20	4		-0.737458	1.52205	1.16368	-0.753645	1.38136	-0.562884	-1.04921		0.473227	0.153219	0.268123	0.503297	0.198582
Cpap	106	57.5706	60.784	57.88	58.5129	57.4933	59.6688		0.952225	n.s.	0.982574	n.s.	1.01975	n.s.		2.46055	4.03738	3.06307	2.70199	3.27738	4.86234		0.0440754	0.0687939	0.0533772	0.0472271	0.0577963	0.0865819		8	7	29	11	18	4		1.82938	1.31289	1.924	0.388534	1.78318	0.908227	-0.45079		0.0983292	0.220214	0.085608	0.712446	0.113608
Cppa	107	72.615	79.7244	72.967	73.8792	72.3588			0.91524	n.s.	0.979421	n.s.				3.01151	4.08379	4.01995	4.8914	3.50517			0.0440642	0.0544254	0.0560109	0.0689668	0.0497871			4	4	15	6	9			2.80222	2.04661	3.13088		2.95011	0.657128			0.0340072	0.0776826	0.0253676		0.0345335
Cppp	108				80.435	82.1331					1.02111	n.s.							6.49177	6.05688						0.0840712	0.0757932						6	9								-0.509687
ABalaaaa	109	62.2544	63.7638	65.2693	63.4542	66.8251			1.02361	n.s.	1.05312	n.s.				2.92871	4.39831	5.90012	4.69207	6.71996			0.0499846	0.0732893	0.092135	0.0770253	0.104152			4	4	13	6	7			0.571282	0.106152	-0.911218		-0.549237	-1.05964			0.591514	0.918483	0.386876		0.600592
ABalaaap	110	54.17	56.8672	55.7271	54.1443	57.3099			0.979952	n.s.	1.05847	n.s.				1.85887	2.51268	3.65105	2.09959	4.31602			0.0364602	0.0463942	0.0666866	0.0401626	0.0779998			4	5	14	7	7			1.84959	1.97934	-0.223502		0.766067	-1.74504			0.106918	0.0845004	0.827757		0.460552
ABalaapa	111	62.8125	63.725	61.7854	61.6408	61.8938			0.969563	n.s.	1.0041	n.s.				2.62684	4.08092	5.06388	4.60586	5.69546			0.0444341	0.068042	0.0834227	0.0778342	0.0948955			4	4	14	6	8			0.376036	0.751124	0.638768		0.792165	-0.091823			0.721965	0.476534	0.540176		0.458653
ABalaapp	112	55.8831	59.32	56.8012	55.5136	57.9279			0.957539	n.s.	1.04349	n.s.				0.838772	4.70522	3.47609	2.59215	3.91129			0.0159475	0.0842767	0.0622174	0.0483617	0.0696299			4	4	15	7	8			1.43821	1.49362	0.510114		1.00031	-1.42462			0.240757	0.208387	0.631012		0.374856
ABalapaa	113	57.6106	60.465	60.7251	59.1136	62.3366			1.0043	n.s.	1.05452	n.s.				1.65721	3.74623	3.16026	2.51537	3.04178			0.0305635	0.0658292	0.0529715	0.0440712	0.0505389			4	4	14	7	7			1.3936	0.643361	-0.851565		-0.126572	-2.16039			0.233742	0.550724	0.431179		0.904976
ABalapap	114	53.8135	56.3392	55.6365	55.1407	56.0703			0.987527	n.s.	1.01686	n.s.				2.06074	4.11448	3.02233	2.2376	3.67648			0.0402088	0.0766821	0.0552282	0.0420291	0.0676182			5	5	15	7	8			1.22729	0.591814	0.119354		0.35158	-0.59945			0.266509	0.57668	0.907986		0.738187
ABalappa	115	61.6481	62.755	61.8786	62.7564	61.0008			0.986035	n.s.	0.972024	n.s.				2.17262	2.14476	3.85356	4.34956	3.38499			0.0374449	0.0363128	0.0633882	0.071784	0.0574728			4	4	14	7	7			0.725126	-0.000727815	1.05081		0.58943	0.842779			0.495674	0.999435	0.321494		0.569662
ABalappp	116	52.8745	52.2339	55.2689	52.1743	57.6758			1.0581	n.s.	1.10545	n.s.				1.61697	3.1647	5.6997	2.24746	6.49823			0.0321104	0.0636165	0.104738	0.0446145	0.115798			5	5	16	7	9			-0.403062	0.0361156	-2.1032		-1.51119	-2.36454			0.700974	0.972226	0.0573375		0.155157
ABalpaaa	117	59.945	63.3469	62.5972	61.1329	63.7362			0.988166	n.s.	1.04258	n.s.				5.01292	2.02664	3.92889	2.86206	4.41176			0.0888519	0.0339923	0.0637453	0.048489	0.0711419			4	4	16	7	9			1.2583	1.4937	-0.21798		0.531206	-1.426			0.27744	0.172145	0.831483		0.607356
ABalpaap	118	51.0432	52.8387	51.5767	50.4725	52.4601			0.976116	n.s.	1.03938	n.s.				4.88155	3.89458	3.24793	3.56145	2.84777			0.0990513	0.0773924	0.0638474	0.0727673	0.0556417			7	5	18	8	10			0.707643	1.10097	0.193089		0.663316	-1.28393			0.495663	0.302846	0.853034		0.533259
ABalpapa	119	53.9275	56.0515	56.5016	56.0706	56.8847			1.00803	n.s.	1.01452	n.s.				2.31694	3.97897	3.73197	3.26421	4.26393			0.0447542	0.0745371	0.067022	0.0600353	0.0770397			6	5	17	8	9			1.05398	-0.0090173	-0.365841		-0.225447	-0.444625			0.331318	0.993046	0.723012		0.828842
ABalpapp	120	48.6547	50.7986	51.9254	49.3494	53.6428			1.02218	n.s.	1.087	n.s.				1.5303	2.93245	4.16019	1.88424	4.4262			0.0324352	0.0606133	0.08112	0.0393747	0.0842315			8	5	20	8	12			1.51123	0.985242	-1.55338		-0.700824	-2.97953			0.186977	0.361964	0.147528		0.501973
ABalppaa	121	64.5206	61.61	64.3576	64.4986	64.2343			1.0446	n.s.	0.995903	n.s.				1.42094	3.07139	3.31838	1.72316	4.40919			0.0233995	0.0529679	0.0524209	0.0276704	0.0707873			4	4	15	7	8			-1.72015	-1.73166	-1.19927		-1.56245	0.156416			0.156649	0.156459	0.262784		0.178329
ABalppap	122	55.2912	55.5322	54.7375	54.1871	55.1655			0.985689	n.s.	1.01806	n.s.				0.791266	2.75115	3.31768	2.23317	4.05299			0.0152053	0.0520187	0.0615579	0.0426841	0.0755106			4	5	16	7	9			0.186436	0.901484	0.20068		0.5356	-0.614162			0.859722	0.395221	0.844524		0.606764
ABalpppa	123	57.5555	57.829	57.4374	55.7675	58.9218			0.993229	n.s.	1.05656	n.s.				2.07798	3.31098	3.84542	3.60611	3.59564			0.0379092	0.0601174	0.0679343	0.0666841	0.0627191			5	5	17	8	9			0.156449	1.05503	-0.573636		0.22377	-1.80259			0.88027	0.318244	0.58023		0.828904
ABalpppp	124	51.2167	51.5981	51.6656	50.1638	52.6669			1.00131	n.s.	1.0499	n.s.				2.01053	2.70868	3.90471	4.36386	3.38863			0.040891	0.0551204	0.0765213	0.0897107	0.0656813			6	5	20	8	12			0.260676	0.731222	-0.686427		-0.0452209	-1.3702			0.801556	0.479951	0.508926		0.964948
ABaraaaa	125	65.7044	68.1394	65.8413	65.1486	66.534			0.966274	n.s.	1.02127	n.s.				2.395	5.73169	2.64414	2.00327	3.16472			0.0387294	0.0893745	0.0408765	0.0318475	0.0492643			4	4	14	7	7			0.783973	1.00898	0.516953		0.778568	-0.978647			0.476709	0.378855	0.631986		0.487203
ABaraaap	126	52.3746	53.5379	53.6958	52.0112	55.1932			1.00295	n.s.	1.06118	n.s.				2.65314	2.90607	3.35451	2.26022	3.56024			0.0527677	0.0569947	0.0633911	0.0448145	0.0662969			6	5	17	8	9			0.687614	1.00065	-0.94052		-0.102977	-2.224			0.510478	0.350219	0.369154		0.920694
ABaraapa	127	55.7115	55.6431	56.2526	54.015	58.0426			1.01095	n.s.	1.07456	n.s.				2.24868	2.29548	3.85924	2.75775	3.76919			0.042381	0.043832	0.0695584	0.0526507	0.0665618			5	4	18	8	10			-0.0448072	1.08111	-1.45011		-0.416138	-2.61548			0.965606	0.314202	0.179767		0.68906
ABaraapp	128	52.0025	55.0897	54.8862	52.4686	56.7666			0.996306	n.s.	1.08192	n.s.				3.00193	3.35239	3.34326	3.62672	1.41437			0.060132	0.0638959	0.0618642	0.0715905	0.0256077			6	5	16	7	9			1.5943	1.29029	-1.067		0.118546	-2.96502			0.148606	0.228443	0.336605		0.90911
ABarapaa	129	57.6055	57.2242	59.3709	57.8375	60.9043			1.03751	n.s.	1.05302	n.s.				1.43523	2.96365	4.5129	3.20552	5.29076			0.0261606	0.0543796	0.0771997	0.0571548	0.0895848			5	5	16	8	8			-0.258926	-0.35169	-1.60527		-1.23335	-1.40222			0.804668	0.733006	0.136841		0.244504
ABarapap	130	51.2133	52.9641	53.0886	51.3387	54.6441			1.00235	n.s.	1.06438	n.s.				1.90367	3.57843	4.36684	3.86741	4.38946			0.0387202	0.0709415	0.0834652	0.0776853	0.0825596			6	5	17	8	9			0.984101	0.772171	-0.774753		-0.0648851	-1.6505			0.364006	0.459435	0.456429		0.949879
ABarappa	131	59.0105	60.465	60.1217	58.4964	61.7471			0.994323	n.s.	1.05557	n.s.				2.07169	3.74623	3.87949	2.38595	4.55551			0.0368625	0.0658292	0.0656795	0.0422446	0.0764118			5	4	14	7	7			0.696026	0.946932	-0.503909		0.160327	-1.67241			0.521082	0.392381	0.628742		0.878885
ABarappp	132	55.1995	56.0057	56.3636	54.8536	57.5381			1.00639	n.s.	1.04894	n.s.				2.52178	2.14691	2.89196	2.13205	2.95386			0.047969	0.0402505	0.0521108	0.0402562	0.0527636			5	5	16	7	9			0.544317	0.91914	-1.11423		-0.297773	-2.10987			0.601429	0.382711	0.28927		0.772601
ABarpaaa	133	69.1356	68.46	68.0795	69.7175	66.8511			0.994443	n.s.	0.958885	n.s.				1.71677	4.78376	6.96328	4.26249	8.54668			0.0263839	0.074244	0.104108	0.063687	0.131842			4	4	14	6	8			-0.265864	-0.425131	0.417493		0.125541	0.822046			0.804279	0.68555	0.685439		0.903562
ABarpaap	134	50.755	51.9046	53.1382	51.0787	54.636			1.02377	n.s.	1.06964	n.s.				2.9046	3.36671	4.05951	2.27983	4.49047			0.0592717	0.06718	0.0774006	0.0460285	0.0840569			7	7	19	8	11			0.684016	0.548244	-1.47002		-0.782305	-2.25754			0.507234	0.595149	0.161666		0.448142
ABarpapa	135	55.6385	57.1662	57.4326	55.5594	59.5734			1.00466	n.s.	1.07225	n.s.				2.09662	3.41885	5.25543	1.74103	7.13329			0.039567	0.0635433	0.0930311	0.0323157	0.124016			5	4	15	8	7			0.783585	0.884417	-0.754018		-0.122022	-1.45145			0.470499	0.428862	0.470289		0.906153
ABarpapp	136	53.3285	57.3555	55.494	54.1187	56.7164			0.967544	n.s.	1.048	n.s.				1.72753	4.01006	3.16677	2.25811	3.4674			0.0340138	0.0734116	0.0579043	0.043029	0.0628339			5	5	17	8	9			2.06229	1.64885	0.299555		0.954189	-1.84922			0.0896563	0.153642	0.772782		0.379641
ABarppaa	137	62.24	62.3768	62.5751	60.8393	64.0939			1.00318	n.s.	1.05349	n.s.				2.45614	4.24292	4.02454	2.3914	4.67362			0.0419289	0.0714218	0.0653873	0.0407107	0.0751971			4	5	15	7	8			0.0605249	0.731532	-0.682432		-0.0916462	-1.72801			0.953549	0.492837	0.51159		0.929702
ABarppap	138	65.6663	63.6569	62.3226	61.7929	62.7861			0.97904	n.s.	1.01607	n.s.				1.57013	5.48277	3.75716	2.76191	4.60085			0.0254053	0.0915132	0.0612904	0.0462926	0.0755681			4	4	15	7	8			-0.704652	0.635442	0.273163		0.458834	-0.513901			0.525195	0.560575	0.795232		0.671452
ABarpppa	139	59.3338	59.0785	58.5346	57.7944	59.2749			0.990794	n.s.	1.02562	n.s.				3.19225	4.29254	6.308	4.4525	8.0118			0.0571642	0.0762912	0.109449	0.0794478	0.139387			4	5	16	8	8			-0.102241	0.517251	-0.0573892		0.218918	-0.456855			0.921437	0.617602	0.955275		0.831115
ABarpppp	140	63.39	62.6869	62.3692	63.1721	61.6666			0.994932	n.s.	0.976168	n.s.				1.99887	4.06808	3.91825	2.74311	4.80071			0.0335036	0.0689512	0.0638705	0.0449737	0.0802821			4	4	15	7	8			-0.31025	-0.212553	0.385119		0.139837	0.756953			0.770615	0.840758	0.711354		0.894693
ABplaaaa	141	54.2565	57.86	59.0433	56.065	62.0216			1.02045	n.s.	1.10624	n.s.				2.13421	3.51758	5.78334	4.45573	5.6164			0.0413023	0.0638345	0.0994813	0.081958	0.0933855			5	5	16	8	8			1.95841	0.806273	-1.64274		-0.553811	-2.35001			0.0935786	0.438497	0.128746		0.590372
ABplaaap	142	55.7115	57.441	57.7665	56.345	59.1881			1.00567	n.s.	1.05046	n.s.				1.51905	2.75533	4.45794	3.7034	4.92458			0.0286296	0.0503664	0.0783775	0.0677812	0.0858024			5	5	16	8	8			1.22914	0.609569	-0.819053		-0.195931	-1.30506			0.26344	0.55512	0.43021		0.848168
ABplaapa	143	52.8166	55.8563	57.8332	56.1081	59.5583			1.03539	n.s.	1.06149	n.s.				2.58171	3.21219	3.46286	2.39693	3.6261			0.0504082	0.0599043	0.0608122	0.0440549	0.0627859			8	6	16	8	8			1.90246	-0.161317	-2.01862		-1.25811	-2.24501			0.0880257	0.875432	0.0673094		0.23781
ABplaapp	144	49.2609	50.7571	51.7578	50.2444	52.7667			1.01972	n.s.	1.0502	n.s.				2.5748	2.53544	3.61562	2.242	4.07495			0.0539021	0.0517364	0.0707298	0.0460164	0.0788348			8	7	20	8	12			1.13192	0.412251	-1.32448		-0.798124	-1.77816			0.278445	0.687339	0.203035		0.437126
ABplapaa	145	60.4425	61.0195	60.0648	59.0069	61.1227			0.984354	n.s.	1.03586	n.s.				1.3126	2.12171	3.19016	3.07551	3.1291			0.0228024	0.0365096	0.0539419	0.0537499	0.0527936			5	5	16	8	8			0.517137	1.39461	-0.0707987		0.770235	-1.36398			0.621758	0.191205	0.944848		0.458495
ABplapap	146	53.5229	55.5012	54.3267	53.7263	54.9272			0.978839	n.s.	1.02235	n.s.				2.86782	2.44492	2.76136	2.2752	3.21541			0.0554948	0.0462543	0.051623	0.0436714	0.0603688			7	5	16	8	8			1.28495	1.30759	0.36392		0.90827	-0.862351			0.229049	0.226738	0.723217		0.391961
ABplappa	147	56.6355	56.7364	58.3235	56.6019	60.0451			1.02797	n.s.	1.06083	n.s.				1.83362	3.36311	4.342	3.60149	4.54467			0.0339946	0.0617458	0.0756102	0.0656168	0.0780528			5	6	16	8	8			0.0631035	0.0718497	-1.56549		-0.906754	-1.67949			0.951244	0.943975	0.143448		0.382858
ABplappp	148	62.2112	64.8019	66.6607	65.7657	67.4437			1.02868	n.s.	1.02552	n.s.				2.19077	4.76595	3.68321	2.88027	4.30343			0.037416	0.0781432	0.056174	0.0453601	0.0658016			4	4	15	7	8			0.987778	-0.367896	-0.934423		-0.724468	-0.896938			0.376533	0.730393	0.388939		0.508792
ABplpaaa	149	54.1556	56.6962	57.1355	54.8494	59.4216			1.00775	n.s.	1.08336	n.s.				1.14804	4.70177	5.69644	4.3283	6.23333			0.0225238	0.0870756	0.101258	0.0813785	0.108178			4	5	16	8	8			1.16559	0.710155	-0.894755		-0.172982	-1.70415			0.300816	0.497622	0.391107		0.866931
ABplpaap	150	54.175	54.8729	55.4653	54.8371	55.9539			1.0108	n.s.	1.02037	n.s.				2.76957	3.72101	2.03607	2.08394	1.97535			0.0543178	0.0712021	0.0372825	0.0393596	0.0362837			4	5	16	7	9			0.32237	0.0194218	-0.604063		-0.340446	-1.08784			0.756601	0.985156	0.570792		0.747991
ABplpapa	151	54.7619	56.9985	57.7463	57.1864	58.1818			1.01312	n.s.	1.01741	n.s.				2.95911	3.30538	3.24908	1.62363	4.16278			0.0574132	0.0608902	0.0571438	0.0294059	0.0735352			4	5	16	7	9			1.06941	-0.117416	-0.583631		-0.443364	-0.656027			0.321087	0.910781	0.572152		0.67163
ABplpapp	152	50.8542	53.1809	53.3526	52.2106	54.1832			1.00323	n.s.	1.03778	n.s.				2.85052	2.92264	3.03448	3.29369	2.67927			0.0583884	0.0577043	0.0576242	0.065056	0.0505722			6	5	19	8	11			1.32954	0.55427	-0.652299		-0.115966	-1.39181			0.218031	0.592249	0.534422		0.911193
ABplppaa	153	61.5495	65.3937	63.3852	61.5358	64.7723			0.969286	n.s.	1.0526	n.s.				9.25379	4.35786	5.36164	6.58991	4.15185			0.157865	0.0708053	0.0860987	0.111553	0.0661023			5	4	14	6	8			0.821949	1.11436	0.236535		0.770162	-1.05604			0.44295	0.297542	0.821113		0.470899
ABplppap	154	61.6431	59.4269	60.0694	59.1564	60.8682			1.01081	n.s.	1.02894	n.s.				0.646192	4.05584	3.45351	2.00874	4.33959			0.011138	0.0725149	0.0584502	0.0351692	0.0735229			4	4	15	7	8			-1.07926	0.124895	-0.566793		-0.290024	-0.999945			0.35605	0.906836	0.589868		0.785439
ABplpppa	155	54.1556	56.6131	57.8587	57.17	58.3944			1.022	n.s.	1.02142	n.s.				1.14804	3.95558	3.02686	2.83556	3.22651			0.0225238	0.0742373	0.0531321	0.05137	0.0567887			4	4	16	7	9			1.19331	-0.247554	-0.791215		-0.588207	-0.806403			0.307279	0.814691	0.46554		0.588564
ABplpppa.1	156	54.1556	56.6131	57.8587	57.17	58.3944			1.022	n.s.	1.02142	n.s.				1.14804	3.95558	3.02686	2.83556	3.22651			0.0225238	0.0742373	0.0531321	0.05137	0.0567887			4	4	16	7	9			1.19331	-0.247554	-0.791215		-0.588207	-0.806403			0.307279	0.814691	0.46554		0.588564
ABplpppp	157	55.8831	56.6131	57.1848	56.18	57.9662			1.0101	n.s.	1.03179	n.s.				0.838772	3.95558	2.69122	2.50299	2.70387			0.0159475	0.0742373	0.0477973	0.0461443	0.0479414			4	4	16	7	9			0.36107	0.197557	-0.622551		-0.273623	-1.36703			0.740135	0.852161	0.565043		0.79887
ABpraaaa	158	61.6625	62.7256	63.7766	62.1393	65.4139			1.01676	n.s.	1.0527	n.s.				1.89975	4.34448	4.52771	1.99169	5.84764			0.0327344	0.0735905	0.072261	0.0331967	0.0925872			4	4	14	7	7			0.448417	0.255043	-0.867483		-0.422667	-1.40249			0.676497	0.812105	0.410666		0.689969
ABpraaap	159	54.318	56.1281	55.6413	54.0525	57.4571			0.991327	n.s.	1.06299	n.s.				1.05845	3.08497	3.91164	3.64811	3.6004			0.0204605	0.0583982	0.0714727	0.0696011	0.0649002			5	4	15	8	7			1.12188	1.0323	-0.646107		0.264026	-1.81586			0.33169	0.335529	0.538033		0.800752
ABpraapa	160	56.6855	60.0187	58.4847	57.4836	59.3608			0.974441	n.s.	1.03266	n.s.				1.12659	3.70629	3.77111	3.51316	3.99802			0.0208681	0.0656118	0.065555	0.0632986	0.0694559			5	4	15	7	8			1.73569	1.11203	0.282318		0.732794	-0.967926			0.16904	0.308209	0.786403		0.497836
ABpraapp	161	51.0986	53.5379	53.2743	51.3531	54.8113			0.995076	n.s.	1.06734	n.s.				2.28179	2.90607	4.37432	3.66196	4.45059			0.0462494	0.0569947	0.0832497	0.0735378	0.0832284			7	5	18	8	10			1.56391	1.19095	-0.664699		0.158893	-1.80833			0.15979	0.26075	0.519109		0.877008
ABprapaa	162	60.8585	60.08	60.0177	60.7864	59.4197			0.998962	n.s.	0.977516	n.s.				3.26323	2.4395	5.48568	3.5802	6.7743			0.056301	0.0426345	0.0928293	0.0610016	0.117174			5	5	16	7	9			-0.427259	-0.406412	0.263286		0.0355755	0.519164			0.681338	0.693002	0.797208		0.972061
ABprapap	163	54.4333	55.9747	55.3029	54.5319	56.0739			0.987998	n.s.	1.02828	n.s.				3.19107	1.74778	4.07688	4.57846	3.64626			0.0610661	0.0327856	0.0748709	0.086583	0.067058			6	5	16	8	8			1.01456	0.802656	-0.065825		0.52303	-0.745194			0.340162	0.441357	0.948744		0.607919
ABprappa	164	60.87	59.9412	58.9361	59.5029	58.3694			0.983231	n.s.	0.98095	n.s.				3.5178	2.99934	3.20064	1.46349	4.39366			0.0606815	0.0531653	0.0552767	0.0254738	0.0779618			5	4	14	7	7			-0.427312	0.274265	0.702497		0.582193	0.647585			0.682104	0.798012	0.501179		0.585022
ABprappp	165	63.3369	68.6925	67.4566	66.6533	68.1451			0.982008	n.s.	1.02238	n.s.				3.08419	4.99467	3.4922	2.3394	4.31648			0.0517384	0.077255	0.0527652	0.0365604	0.0656047			4	4	13	6	7			1.82469	0.762668	0.183491		0.461395	-0.789125			0.127667	0.489264	0.860877		0.668788
ABprpaaa	166	54.853	57.0206	55.8387	54.3269	57.5664			0.979271	n.s.	1.05963	n.s.				2.21901	5.17047	3.87896	2.82491	4.38953			0.0424764	0.0963445	0.0706251	0.0536233	0.0789748			5	4	15	8	7			0.782774	0.971963	-0.177682		0.426321	-1.67288			0.478709	0.387087	0.86532		0.692084
ABprpaap	167	54.3295	55.6431	55.9732	55.1936	56.6554			1.00593	n.s.	1.02649	n.s.				1.64886	2.29548	2.06271	2.42005	1.53293			0.0318668	0.043832	0.0374659	0.0454126	0.0279026			5	4	15	7	8			0.962922	0.30631	-0.797507		-0.260869	-1.37491			0.377366	0.768701	0.466049		0.805987
ABprpapa	168	53.856	57.1697	57.0109	55.7819	58.2399			0.997222	n.s.	1.04406	n.s.				0.944263	4.21534	2.9245	2.47129	2.961			0.0184098	0.0774206	0.0520988	0.0456872	0.0524303			5	5	16	8	8			1.71527	0.667931	-0.496294		0.0785496	-1.80261			0.154891	0.53005	0.636038		0.940291
ABprpapp	169	52.424	54.0114	53.9824	53.5271	54.301			0.999462	n.s.	1.01446	n.s.				1.51466	3.66762	2.34416	2.08042	2.57091			0.030337	0.0712998	0.0440631	0.0402548	0.0485292			5	5	17	7	10			0.894522	0.266228	-0.158196		0.0167326	-0.684195			0.409644	0.799206	0.879455		0.987297
ABprppaa	170	63.39	65.9469	63.4996	62.8075	64.0929			0.96289	n.s.	1.02047	n.s.				1.99887	3.8904	2.97148	2.01354	3.6594			0.0335036	0.0626799	0.0476952	0.0333947	0.0591343			4	4	13	6	7			1.16916	1.48662	0.776779		1.15842	-0.798875			0.30075	0.209807	0.466659		0.309114
ABprppap	171	58.78	58.9419	60.2018	59.5293	60.8744			1.02138	n.s.	1.0226	n.s.				1.92775	2.77734	2.97436	1.64583	3.92478			0.0348458	0.050065	0.0502887	0.0286349	0.0667761			4	4	14	7	7			0.0957612	-0.386039	-0.951032		-0.787418	-0.836186			0.927197	0.718064	0.368364		0.465649
ABprpppa	172	52.0183	56.1962	55.9259	55.9242	55.9272			0.995189	n.s.	1.00005	n.s.				6.79679	1.65587	3.4313	1.12778	4.57791			0.136106	0.0313075	0.0624501	0.0210065	0.0844127			6	4	14	6	8			1.44282	0.287207	0.147999		0.218823	-0.00179518			0.200377	0.785788	0.885403		0.83078
ABprpppp	173	54.7145	57.7581	56.9022	56.2064	57.5109			0.98518	n.s.	1.02321	n.s.				1.94605	2.96759	3.37979	2.63531	3.9982			0.0373458	0.0545909	0.0603864	0.0485607	0.0716933			5	4	15	7	8			1.76935	0.86827	0.120617		0.497248	-0.754376			0.137329	0.420114	0.906944		0.638962
MSaaaa	174	51.8506	53.3531	51.5601	51.1086	51.9552			0.966393	n.s.	1.01657	n.s.				1.13377	4.00807	3.85996	4.01951	3.94561			0.0232328	0.0798186	0.076111	0.0814553	0.0783158			4	4	15	7	8			0.72143	0.892538	0.572515		0.80111	-0.410474			0.516147	0.404487	0.587744		0.462362
MSaaap	175	58.7512	58.35	56.2527	55.4279	57.0776			0.964057	n.s.	1.02976	n.s.				1.60374	2.95418	4.35136	4.64274	4.22868			0.0290032	0.053793	0.078735	0.0867533	0.0767324			4	4	14	7	7			-0.238738	1.27398	0.584672		1.1156	-0.695036			0.821518	0.235503	0.574154		0.300291
MSaapa	176	52.4231	52.2375	50.9815	48.8614	52.8366			0.975956	n.s.	1.08136	n.s.				0.592718	2.85054	3.22648	0.943035	3.41034			0.0120131	0.0579793	0.064342	0.0199895	0.0665622			4	4	15	7	8			-0.127511	2.29796	-0.320892		0.760807	-3.1616			0.906003	0.0952636	0.757356		0.479423
MSaapp	177				65.988	67.3043					1.01995	n.s.							2.42429	5.15699						0.0385752	0.0798145						5	6								-0.555863
MSapaa	178				59.599	60.579					1.01644	n.s.							2.56177	6.60493						0.0451327	0.112924						5	7								-0.356784
MSapap	179				58.19	59.953					1.0303	n.s.							1.80064	4.78594						0.0324913	0.0826792						5	7								-0.890378
MSappa	180				64.191	65.2498					1.01649	n.s.							2.5972	7.05261						0.0424835	0.111947						5	7								-0.364132
MSappp	181				67.4412	65.7822					0.9754	n.s.							3.11883	6.77187						0.0491355	0.10662						4	7								0.553537
MSpaaa	182	51.8506	53.9062	51.1869	50.1714	52.0754			0.949554	n.s.	1.03795	n.s.				1.13377	3.22307	2.86262	1.75501	3.43739			0.0232328	0.0635271	0.056857	0.0362296	0.0680707			4	4	15	7	8			1.20329	2.14311	0.907055		1.5338	-1.37519			0.29961	0.0979843	0.396835		0.194142
MSpaap	183				60.39	62.0354					1.02725	n.s.							3.47326	4.63245						0.0599103	0.0773413						6	7								-0.730279
MSpapa	184	53.0056	53.4213	51.5217	50.5014	52.4145			0.964443	n.s.	1.03788	n.s.				1.83617	3.63995	3.40431	2.8744	3.76097			0.036806	0.0723952	0.0671766	0.05895	0.0739967			4	4	15	7	8			0.203895	1.37755	0.446655		0.939833	-1.11413			0.847457	0.22479	0.670094		0.39486
MSpapp	185	67.9806	67.2375	68.3825					1.01703	n.s.						0.840938	2.52605	5.89755					0.0131434	0.0399171	0.0883996					4	4	10					-0.558247		-0.440551		-0.508345				0.60907		0.67089		0.620628
MSppaa	186				58.1917	60.9349					1.04714	n.s.							1.61055	4.63774						0.0288298	0.0788281						6	7								-1.46526
MSppap	187				56.1475	58.4375					1.04079	n.s.							3.89536	6.26148						0.072268	0.110975						6	7								-0.803146
MSpppa	188				60.546	63.5918					1.05031	n.s.							2.16477	5.96516						0.0375418	0.0971541						5	7								-1.24131
MSpppp	189				61.798	67.7856					1.09689	n.s.							3.38049	5.60641						0.0574373	0.0856618						5	7								-2.30025
Eala	190
Ealp	191
Eara	192
Earp	193
Epla	194
Eplp	195
Epra	196
Eprp	197
Z2	198				89.755	91.4403					1.01878	n.s.							21.2558	20.769						0.251622	0.238489						4	5								-0.119401
Z3	199
Daa	200
Dap	201
Dpa	202
																							0.0439244	0.0529359	0.0593057	0.0517042	0.0659411	0.065216
																							0.0179889	0.0184202	0.0191251	0.0237074	0.0266988	0.0423813
[truncated: 13 more columns]

## Sheet: Time of Birth
	Order	WT.mean	C.mean	EQ.mean	EA.mean	ED.mean	INV.mean	EQ.over.C	EQ.C.sign	ED.over.EA	ED.EA.sign	INV.over.EA	INV.EA.sign	WT.sd	C.sd	EQ.sd	EA.sd	ED.sd	INV.sd	WT.vc	C.vc	EQ.vc	EA.vc	ED.vc	INV.vc	WT.n	C.n	EQ.n	EA.n	ED.n	INV.n	C.vs.WT.t.stat	C.vs.EA.t.stat	C.vs.ED.t.stat	C.vs.INV.t.stat	C.vs.EQ.t.stat	EA.vs.ED.t.stat	EA.vs.INV.t.stat	C.vs.WT.p.val	C.vs.EA.p.val	C.vs.ED.p.val	C.vs.INV.p.val	C.vs.EQ.p.val	EA.vs.ED.p.val	EA.vs.INV.p.val	C.vs.WT.p.adj	C.vs.EA.p.adj	C.vs.ED.p.adj	C.vs.INV.p.adj
AB	1
P1	2
ABa	3		-24.0718	-24.7928	-24.1223	-25.575		1.02995	n.s.	1.06022	n.s.				1.7669	1.31495	0.8417	1.39141			-0.0760226	-0.0540575	-0.0361392	-0.056672			7	13	7	6			0.0682684	1.71456		0.947519	2.23131			0.947135	0.114559		0.366423	0.0562857			0.956799	0.204348
ABp	4		-24.0718	-24.7928	-24.1223	-25.575		1.02995	n.s.	1.06022	n.s.				1.7669	1.31495	0.8417	1.39141			-0.0760226	-0.0540575	-0.0361392	-0.056672			7	13	7	6			0.0682684	1.71456		0.947519	2.23131			0.947135	0.114559		0.366423	0.0562857			0.956799	0.204348
EMS	5		-20.4939	-22.2339	-21.8551	-22.6758		1.0849	.	1.03755	n.s.				1.57219	0.732611	0.717159	0.485531			-0.0794546	-0.0335838	-0.0339861	-0.022304			7	13	7	6			2.08413	3.48314		2.77065	2.44396			0.0690376	0.00956177		0.0260644	0.033507			0.160817	0.0245874
P2	6		-20.4939	-22.2339	-21.8551	-22.6758		1.0849	.	1.03755	n.s.				1.57219	0.732611	0.717159	0.485531			-0.0794546	-0.0335838	-0.0339861	-0.022304			7	13	7	6			2.08413	3.48314		2.77065	2.44396			0.0690376	0.00956177		0.0260644	0.033507			0.160817	0.0245874
ABal	7	0	0	0	0	0	0	#NUM!		#NUM!		#NUM!		0	0	0	0	0	0	#NUM!	#NUM!	#NUM!	#NUM!	#NUM!	#NUM!	10	18	49	21	28	7	#NUM!	#NUM!	#NUM!	#NUM!	#NUM!	#NUM!	#NUM!	#NUM!	#NUM!	#NUM!	#NUM!	#NUM!	#NUM!	#NUM!	#NUM!	#NUM!	#NUM!	#NUM!
ABar	8	0	0	0	0	0	0	#NUM!		#NUM!		#NUM!		0	0	0	0	0	0	#NUM!	#NUM!	#NUM!	#NUM!	#NUM!	#NUM!	10	18	49	21	28	7	#NUM!	#NUM!	#NUM!	#NUM!	#NUM!	#NUM!	#NUM!	#NUM!	#NUM!	#NUM!	#NUM!	#NUM!	#NUM!	#NUM!	#NUM!	#NUM!	#NUM!	#NUM!
ABpl	9	0.2405	0.0075	-0.0917959	0.0908571	-0.228786	-0.310714	-12.2395	n.s.	-2.51808	n.s.	-3.41981	n.s.	0.760528	0.835483	0.593535	0.41636	0.672653	0.822073	3.24133	112.945	-6.4988	4.63713	-2.96635	-2.74024	10	18	49	21	28	7	-0.749588	-0.384356	1.00809	0.865036	0.463125	2.0457	1.24047	0.462108	0.704088	0.321279	0.405241	0.647517	0.0465824	0.254469	0.679158	0.850057	0.444848	0.560354
ABpr	10	0.2405	0.0075	-0.0917959	0.0908571	-0.228786	-0.310714	-12.2395	n.s.	-2.51808	n.s.	-3.41981	n.s.	0.760528	0.835483	0.593535	0.41636	0.672653	0.822073	3.24133	112.945	-6.4988	4.63713	-2.96635	-2.74024	10	18	49	21	28	7	-0.749588	-0.384356	1.00809	0.865036	0.463125	2.0457	1.24047	0.462108	0.704088	0.321279	0.405241	0.647517	0.0465824	0.254469	0.679158	0.850057	0.444848	0.560354
MS	11	7.43425	6.76164	3.92021	3.95338	3.89534	2.26571	0.579773	***	0.985318	n.s.	0.573108	n.s.	0.682426	1.05551	1.27517	1.31403	1.26896	1.13939	0.0940898	0.15827	0.32694	0.336338	0.328672	0.520843	10	18	49	21	28	7	-2.0423	7.39741	8.29495	9.03985	9.21497	0.155272	3.26196	0.0517051	8.61614e-09	2.62289e-10	3.29425e-06	4.7298e-11	0.877344	0.00694174	0.16718	1.03069e-07	4.32777e-09	0.000106514
E	12	7.43425	6.76164	3.92021	3.95338	3.89534	2.26571	0.579773	***	0.985318	n.s.	0.573108	n.s.	0.682426	1.05551	1.27517	1.31403	1.26896	1.13939	0.0940898	0.15827	0.32694	0.336338	0.328672	0.520843	10	18	49	21	28	7	-2.0423	7.39741	8.29495	9.03985	9.21497	0.155272	3.26196	0.0517051	8.61614e-09	2.62289e-10	3.29425e-06	4.7298e-11	0.877344	0.00694174	0.16718	1.03069e-07	4.32777e-09	0.000106514
C	13	13.6677	11.6695	8.3817	8.45767	8.32473	5.52179	0.718259	***	0.984282	n.s.	0.652873	n.s.	1.0418	1.08483	1.38986	1.36107	1.4332	2.18349	0.0781289	0.0942539	0.166666	0.162843	0.173699	0.409554	10	18	49	21	28	7	-4.79167	8.19522	8.9797	7.11551	10.1558	0.330714	3.34727	0.000120414	8.00585e-10	2.16864e-11	0.00016899	1.80133e-12	0.742418	0.0108668	0.00194669	3.07173e-08	7.15651e-10	0.00208381
P3	14	13.6677	11.6695	8.3817	8.45767	8.32473	5.52179	0.718259	***	0.984282	n.s.	0.652873	n.s.	1.0418	1.08483	1.38986	1.36107	1.4332	2.18349	0.0781289	0.0942539	0.166666	0.162843	0.173699	0.409554	10	18	49	21	28	7	-4.79167	8.19522	8.9797	7.11551	10.1558	0.330714	3.34727	0.000120414	8.00585e-10	2.16864e-11	0.00016899	1.80133e-12	0.742418	0.0108668	0.00194669	3.07173e-08	7.15651e-10	0.00208381
ABala	15	26.3865	26.1338	26.1633	26.1855	26.1474	24.8279	1.00113	n.s.	0.998543	n.s.	0.948153	n.s.	0.917165	1.15763	1.12837	1.11939	1.15497	0.940314	0.0356279	0.0449114	0.0433528	0.0432828	0.044566	0.039226	10	18	48	20	28	7	-0.63451	-0.139537	-0.038704	2.9147	-0.0925731	0.114852	3.12317	0.532118	0.889819	0.969338	0.0116679	0.92686	0.909112	0.00845151	0.707061	0.940433	0.976523	0.0470186
ABalp	16	26.3865	26.1338	26.1633	26.1855	26.1474	24.8279	1.00113	n.s.	0.998543	n.s.	0.948153	n.s.	0.917165	1.15763	1.12837	1.11939	1.15497	0.940314	0.0356279	0.0449114	0.0433528	0.0432828	0.044566	0.039226	10	18	48	20	28	7	-0.63451	-0.139537	-0.038704	2.9147	-0.0925731	0.114852	3.12317	0.532118	0.889819	0.969338	0.0116679	0.92686	0.909112	0.00845151	0.707061	0.940433	0.976523	0.0470186
ABara	17	26.3865	26.0226	25.8248	25.7494	25.8786	25.1386	0.992398	n.s.	1.00502	n.s.	0.976276	n.s.	0.917165	1.05671	1.19733	1.12015	1.26702	0.951537	0.0356279	0.0411714	0.0466051	0.0440458	0.0493974	0.0392035	10	18	48	20	28	7	-0.951837	0.77332	0.4168	2.02079	0.652538	-0.372734	1.39383	0.351959	0.444394	0.679002	0.0659053	0.518388	0.711143	0.188007	0.559648	0.661579	0.795518	0.143659
ABarp	18	26.3865	26.0226	25.8248	25.7494	25.8786	25.1386	0.992398	n.s.	1.00502	n.s.	0.976276	n.s.	0.917165	1.05671	1.19733	1.12015	1.26702	0.951537	0.0356279	0.0411714	0.0466051	0.0440458	0.0493974	0.0392035	10	18	48	20	28	7	-0.951837	0.77332	0.4168	2.02079	0.652538	-0.372734	1.39383	0.351959	0.444394	0.679002	0.0659053	0.518388	0.711143	0.188007	0.559648	0.661579	0.795518	0.143659
ABpla	19	26.3865	26.6258	25.7813	25.8557	25.7282	25.1021	0.968285	*	0.99507	n.s.	0.970855	n.s.	0.917165	1.14817	1.23213	0.974371	1.40271	1.22286	0.0356279	0.0437214	0.0480405	0.038156	0.0550069	0.0504553	10	18	48	20	28	7	0.603196	2.21649	2.36928	2.84473	2.60764	0.371482	1.47474	0.552418	0.033542	0.0225749	0.0168004	0.0136374	0.711985	0.175041	0.71446	0.0819917	0.0541641	0.0571805
ABplp	20	26.3865	26.6258	25.7813	25.8557	25.7282	25.1021	0.968285	*	0.99507	n.s.	0.970855	n.s.	0.917165	1.14817	1.23213	0.974371	1.40271	1.22286	0.0356279	0.0437214	0.0480405	0.038156	0.0550069	0.0504553	10	18	48	20	28	7	0.603196	2.21649	2.36928	2.84473	2.60764	0.371482	1.47474	0.552418	0.033542	0.0225749	0.0168004	0.0136374	0.711985	0.175041	0.71446	0.0819917	0.0541641	0.0571805
ABpra	21	26.6232	26.5189	25.9306	26.104	25.8068	24.8279	0.977816	n.s.	0.988615	n.s.	0.951115	n.s.	1.10486	1.20571	1.31912	1.00094	1.5119	0.940314	0.0425373	0.0460974	0.0511362	0.0388236	0.0591085	0.039226	10	18	48	20	28	7	-0.231722	1.14706	1.76714	3.7161	1.71982	0.818851	3.03826	0.819088	0.259556	0.0844997	0.00227926	0.0947582	0.417112	0.0111229	0.854317	0.489974	0.162436	0.0147392
ABprp	22	26.6232	26.5189	25.9306	26.104	25.8068	24.8279	0.977816	n.s.	0.988615	n.s.	0.951115	n.s.	1.10486	1.20571	1.31912	1.00094	1.5119	0.940314	0.0425373	0.0460974	0.0511362	0.0388236	0.0591085	0.039226	10	18	48	20	28	7	-0.231722	1.14706	1.76714	3.7161	1.71982	0.818851	3.03826	0.819088	0.259556	0.0844997	0.00227926	0.0947582	0.417112	0.0111229	0.854317	0.489974	0.162436	0.0147392
MSa	23	38.5898	36.5169	31.9099	31.7981	31.9898	28.7579	0.87384	***	1.00603	n.s.	0.90439	n.s.	1.03132	1.67586	2.01122	2.03482	2.02775	2.08928	0.0273933	0.0465677	0.0633564	0.0647918	0.0639533	0.0752455	10	17	48	20	28	7	-3.9777	7.73439	8.10409	8.73627	9.22359	-0.322272	3.33585	0.000527998	4.4429e-09	7.0337e-10	8.44716e-06	1.01526e-10	0.748884	0.00726065	0.00640197	7.33078e-08	9.94766e-09	0.000204844
MSp	24	38.5898	36.5169	31.9099	31.7981	31.9898	28.7579	0.87384	***	1.00603	n.s.	0.90439	n.s.	1.03132	1.67586	2.01122	2.03482	2.02775	2.08928	0.0273933	0.0465677	0.0633564	0.0647918	0.0639533	0.0752455	10	17	48	20	28	7	-3.9777	7.73439	8.10409	8.73627	9.22359	-0.322272	3.33585	0.000527998	4.4429e-09	7.0337e-10	8.44716e-06	1.01526e-10	0.748884	0.00726065	0.00640197	7.33078e-08	9.94766e-09	0.000204844
Ea	25	41.003	38.1138	32.8664	32.6043	33.0536	30.04	0.862324	***	1.01378	n.s.	0.921352	n.s.	1.44784	1.12174	2.28582	1.94753	2.51774	2.45872	0.0361935	0.0298643	0.0699109	0.0604789	0.0768513	0.0847715	10	17	48	20	28	7	-5.42496	10.7297	9.23219	8.33794	12.2707	-0.696658	2.4986	6.41581e-05	5.58189e-12	1.71908e-11	6.70124e-05	1.53931e-17	0.489549	0.0345223	0.00124467	5.52607e-10	7.15651e-10	0.00108337
Ep	26	41.003	38.1138	32.8664	32.6043	33.0536	30.04	0.862324	***	1.01378	n.s.	0.921352	n.s.	1.44784	1.12174	2.28582	1.94753	2.51774	2.45872	0.0361935	0.0298643	0.0699109	0.0604789	0.0768513	0.0847715	10	17	48	20	28	7	-5.42496	10.7297	9.23219	8.33794	12.2707	-0.696658	2.4986	6.41581e-05	5.58189e-12	1.71908e-11	6.70124e-05	1.53931e-17	0.489549	0.0345223	0.00124467	5.52607e-10	7.15651e-10	0.00108337
Ca	27	47.4868	43.9874	39.3157	39.7431	39.0104	35.5339	0.893795	***	0.981562	n.s.	0.894089	n.s.	1.15629	1.33665	2.14497	2.03681	2.204	2.97609	0.0249584	0.0308339	0.0548419	0.05189	0.0570021	0.0867448	10	17	48	20	28	7	-7.16111	7.59195	9.42953	7.22119	10.4215	1.18729	3.46848	4.26054e-07	9.68493e-09	4.98255e-12	0.000171861	1.20133e-13	0.241641	0.00836422	4.13272e-05	1.03069e-07	4.93272e-10	0.00208381
Cp	28	47.4868	43.9874	39.3157	39.7431	39.0104	35.5339	0.893795	***	0.981562	n.s.	0.894089	n.s.	1.15629	1.33665	2.14497	2.03681	2.204	2.97609	0.0249584	0.0308339	0.0548419	0.05189	0.0570021	0.0867448	10	17	48	20	28	7	-7.16111	7.59195	9.42953	7.22119	10.4215	1.18729	3.46848	4.26054e-07	9.68493e-09	4.98255e-12	0.000171861	1.20133e-13	0.241641	0.00836422	4.13272e-05	1.03069e-07	4.93272e-10	0.00208381
D	29	59.2797	53.5083	46.9728	47.4615	46.6412	40.3532	0.877859	***	0.982717	n.s.	0.850231	n.s.	2.3804	2.47543	3.12422	3.04688	3.18721	5.0766	0.0411593	0.0469854	0.0668649	0.0650416	0.0689448	0.130297	10	16	47	19	28	7	-5.92253	6.47701	7.95189	6.52502	8.5038	0.888983	3.4808	8.8756e-06	2.39629e-07	1.32858e-09	0.000275799	8.86855e-10	0.379332	0.00890635	0.000286978	1.97694e-06	1.64412e-08	0.00267525
P4	30	59.2797	53.5083	46.9728	47.4615	46.6412	40.3532	0.877859	***	0.982717	n.s.	0.850231	n.s.	2.3804	2.47543	3.12422	3.04688	3.18721	5.0766	0.0411593	0.0469854	0.0668649	0.0650416	0.0689448	0.130297	10	16	47	19	28	7	-5.92253	6.47701	7.95189	6.52502	8.5038	0.888983	3.4808	8.8756e-06	2.39629e-07	1.32858e-09	0.000275799	8.86855e-10	0.379332	0.00890635	0.000286978	1.97694e-06	1.64412e-08	0.00267525
ABalaa	31	58.2657	58.0407	58.6521	58.7005	58.6137	57.5646	1.01053	n.s.	0.998522	n.s.	0.980649	n.s.	1.13594	1.5745	1.48396	1.33356	1.62051	0.695813	0.0199832	0.0275797	0.0254482	0.0230169	0.0279353	0.0125912	10	15	43	19	24	6	-0.414777	-1.29673	-1.09328	0.960082	-1.31392	0.192578	2.72087	0.682184	0.205503	0.282825	0.349332	0.201678	0.848242	0.0145381	0.78776	0.411007	0.421047	0.517043
ABalap	32	58.2657	58.0407	58.6521	58.7005	58.6137	57.5646	1.01053	n.s.	0.998522	n.s.	0.980649	n.s.	1.13594	1.5745	1.48396	1.33356	1.62051	0.695813	0.0199832	0.0275797	0.0254482	0.0230169	0.0279353	0.0125912	10	15	43	19	24	6	-0.414777	-1.29673	-1.09328	0.960082	-1.31392	0.192578	2.72087	0.682184	0.205503	0.282825	0.349332	0.201678	0.848242	0.0145381	0.78776	0.411007	0.421047	0.517043
ABalpa	33	58.2657	57.0931	56.9813	56.9877	56.9762	55.9704	0.998041	n.s.	0.999798	n.s.	0.982149	n.s.	1.13594	1.29128	1.27672	1.18217	1.37214	1.77661	0.0199832	0.0229705	0.0225362	0.0210172	0.0243336	0.0330645	10	16	43	19	24	6	-2.42801	0.250083	0.273609	1.41418	0.296714	0.0294882	1.31371	0.0241927	0.804182	0.786058	0.199717	0.768986	0.976619	0.233663	0.0938677	0.894539	0.855162	0.359232
ABalpp	34	58.2657	57.0931	56.9813	56.9877	56.9762	55.9704	0.998041	n.s.	0.999798	n.s.	0.982149	n.s.	1.13594	1.29128	1.27672	1.18217	1.37214	1.77661	0.0199832	0.0229705	0.0225362	0.0210172	0.0243336	0.0330645	10	16	43	19	24	6	-2.42801	0.250083	0.273609	1.41418	0.296714	0.0294882	1.31371	0.0241927	0.804182	0.786058	0.199717	0.768986	0.976619	0.233663	0.0938677	0.894539	0.855162	0.359232
ABaraa	35	57.7848	57.5421	57.9292	57.8998	57.9525	57.5375	1.00673	n.s.	1.00091	n.s.	0.993743	n.s.	1.27354	1.2783	1.09343	1.00807	1.17758	1.24705	0.0225904	0.0225622	0.018985	0.0176397	0.0205313	0.0225768	10	16	43	19	24	6	-0.472045	-0.90677	-1.02639	0.00759029	-1.074	-0.158103	0.647856	0.642186	0.372172	0.312799	0.994105	0.293659	0.875158	0.537206	0.778401	0.580237	0.439613	0.994105
ABarap	36	57.7848	57.5421	57.9292	57.8998	57.9525	57.5375	1.00673	n.s.	1.00091	n.s.	0.993743	n.s.	1.27354	1.2783	1.09343	1.00807	1.17758	1.24705	0.0225904	0.0225622	0.018985	0.0176397	0.0205313	0.0225768	10	16	43	19	24	6	-0.472045	-0.90677	-1.02639	0.00759029	-1.074	-0.158103	0.647856	0.642186	0.372172	0.312799	0.994105	0.293659	0.875158	0.537206	0.778401	0.580237	0.439613	0.994105
ABarpa	37	57.548	56.6846	56.6518	56.7336	56.5871	56.7163	0.999422	n.s.	0.997418	n.s.	0.999695	n.s.	1.20184	1.15853	1.13773	1.31433	1.00095	1.58486	0.0214062	0.0207576	0.0201995	0.0234715	0.017873	0.0291079	10	16	43	19	24	6	-1.80697	-0.117237	0.274958	-0.0447006	0.0969627	0.402147	0.0242761	0.0868811	0.907385	0.7853	0.965576	0.923486	0.690177	0.981282	0.208815	0.940433	0.855162	0.975634
ABarpp	38	57.548	56.6846	56.6518	56.7336	56.5871	56.7163	0.999422	n.s.	0.997418	n.s.	0.999695	n.s.	1.20184	1.15853	1.13773	1.31433	1.00095	1.58486	0.0214062	0.0207576	0.0201995	0.0234715	0.017873	0.0291079	10	16	43	19	24	6	-1.80697	-0.117237	0.274958	-0.0447006	0.0969627	0.402147	0.0242761	0.0868811	0.907385	0.7853	0.965576	0.923486	0.690177	0.981282	0.208815	0.940433	0.855162	0.975634
ABplaa	39	57.3227	56.8363	56.3649	56.4449	56.3015	57.1475	0.991705	n.s.	0.997458	n.s.	1.01245	n.s.	1.20113	1.23512	1.19553	1.24988	1.17386	1.23895	0.0214777	0.0220708	0.0213339	0.0224346	0.0210668	0.0225832	10	16	43	19	24	6	-0.993664	0.928831	1.36853	-0.525067	1.31483	0.383991	-1.20833	0.332453	0.359905	0.180938	0.612218	0.199982	0.703149	0.259509	0.555999	0.570089	0.291266	0.718695
ABplap	40	57.3227	56.8363	56.3649	56.4449	56.3015	57.1475	0.991705	n.s.	0.997458	n.s.	1.01245	n.s.	1.20113	1.23512	1.19553	1.24988	1.17386	1.23895	0.0214777	0.0220708	0.0213339	0.0224346	0.0210668	0.0225832	10	16	43	19	24	6	-0.993664	0.928831	1.36853	-0.525067	1.31483	0.383991	-1.20833	0.332453	0.359905	0.180938	0.612218	0.199982	0.703149	0.259509	0.555999	0.570089	0.291266	0.718695
ABplpa	41	58.5063	57.6781	57.2981	57.4487	57.1789	56.6608	0.993412	n.s.	0.995303	n.s.	0.986286	n.s.	1.25582	1.56498	1.27528	1.24001	1.31641	1.69111	0.0220013	0.0275852	0.0223864	0.0218687	0.0232624	0.0310899	10	15	43	19	24	6	-1.46173	0.464243	1.02877	1.27166	0.847395	0.689481	1.0551	0.157908	0.646294	0.313058	0.236619	0.406391	0.49453	0.327481	0.3294	0.83346	0.439613	0.389876
ABplpp	42	58.5063	57.6781	57.2981	57.4487	57.1789	56.6608	0.993412	n.s.	0.995303	n.s.	0.986286	n.s.	1.25582	1.56498	1.27528	1.24001	1.31641	1.69111	0.0220013	0.0275852	0.0223864	0.0218687	0.0232624	0.0310899	10	15	43	19	24	6	-1.46173	0.464243	1.02877	1.27166	0.847395	0.689481	1.0551	0.157908	0.646294	0.313058	0.236619	0.406391	0.49453	0.327481	0.3294	0.83346	0.439613	0.389876
ABpraa	43	57.5595	56.9898	56.859	56.8089	56.8986	56.4171	0.997706	n.s.	1.00158	n.s.	0.993102	n.s.	1.31861	1.10148	1.20802	1.28591	1.16921	0.771438	0.0234813	0.0196297	0.0213695	0.0229335	0.020763	0.0142436	10	16	43	19	24	6	-1.14018	0.448022	0.250124	1.36888	0.39468	-0.236275	0.908087	0.270337	0.657066	0.804013	0.194176	0.695934	0.814526	0.378659	0.476777	0.83346	0.865188	0.358763
ABprap	44	57.5595	56.9898	56.859	56.8089	56.8986	56.4171	0.997706	n.s.	1.00158	n.s.	0.993102	n.s.	1.31861	1.10148	1.20802	1.28591	1.16921	0.771438	0.0234813	0.0196297	0.0213695	0.0229335	0.020763	0.0142436	10	16	43	19	24	6	-1.14018	0.448022	0.250124	1.36888	0.39468	-0.236275	0.908087	0.270337	0.657066	0.804013	0.194176	0.695934	0.814526	0.378659	0.476777	0.83346	0.865188	0.358763
ABprpa	45	58.741	58.0913	57.6613	57.8978	57.4741	57.1412	0.992599	n.s.	0.992682	n.s.	0.986933	n.s.	1.47512	1.25794	1.21108	0.767089	1.4612	0.830855	0.0257401	0.0219929	0.0211255	0.0134234	0.0256884	0.0151462	10	16	43	19	24	6	-1.15494	0.53683	1.42386	2.05382	1.17885	1.22342	1.9798	0.264146	0.596345	0.163236	0.0593415	0.249122	0.229076	0.0835517	0.474484	0.792459	0.276542	0.132325
ABprpp	46	58.741	58.0913	57.6613	57.8978	57.4741	57.1412	0.992599	n.s.	0.992682	n.s.	0.986933	n.s.	1.47512	1.25794	1.21108	0.767089	1.4612	0.830855	0.0257401	0.0219929	0.0211255	0.0134234	0.0256884	0.0151462	10	16	43	19	24	6	-1.15494	0.53683	1.42386	2.05382	1.17885	1.22342	1.9798	0.264146	0.596345	0.163236	0.0593415	0.249122	0.229076	0.0835517	0.474484	0.792459	0.276542	0.132325
MSaa	47	74.547	72.4109	67.5534	67.1821	67.844	62.9821	0.932918	***	1.00985	n.s.	0.937483	n.s.	1.01938	1.51772	3.54134	2.9986	3.95637	2.20645	0.0140162	0.0213629	0.0527425	0.0452538	0.0589496	0.0364927	10	13	41	18	23	6	-4.02894	6.35611	4.93108	9.48304	6.98883	-0.609248	3.66829	0.000620537	9.09654e-07	2.59985e-05	2.36069e-05	8.41635e-09	0.545895	0.00333029	0.00668801	4.753e-06	9.71264e-05	0.000457974
MSap	48	74.547	72.4109	67.5534	67.1821	67.844	62.9821	0.932918	***	1.00985	n.s.	0.937483	n.s.	1.01938	1.51772	3.54134	2.9986	3.95637	2.20645	0.0140162	0.0213629	0.0527425	0.0452538	0.0589496	0.0364927	10	13	41	18	23	6	-4.02894	6.35611	4.93108	9.48304	6.98883	-0.609248	3.66829	0.000620537	9.09654e-07	2.59985e-05	2.36069e-05	8.41635e-09	0.545895	0.00333029	0.00668801	4.753e-06	9.71264e-05	0.000457974
MSpa	49	74.547	72.3781	67.3305	66.6638	67.8523	63.3229	0.930262	***	1.01783	n.s.	0.949885	n.s.	1.01938	1.01634	3.54967	2.56373	4.14512	3.01221	0.0140162	0.0143121	0.0530415	0.0389918	0.0617543	0.0495511	10	13	41	18	23	6	-5.065	8.56982	4.97813	7.17738	8.11611	-1.127	2.43829	6.3902e-05	1.0411e-08	3.42825e-05	0.000529505	8.56166e-11	0.266951	0.0423068	0.00124467	1.03069e-07	0.000123417	0.00466927
MSpp	50	74.547	72.3781	67.3305	66.6638	67.8523	63.3229	0.930262	***	1.01783	n.s.	0.949885	n.s.	1.01938	1.01634	3.54967	2.56373	4.14512	3.01221	0.0140162	0.0143121	0.0530415	0.0389918	0.0617543	0.0495511	10	13	41	18	23	6	-5.065	8.56982	4.97813	7.17738	8.11611	-1.127	2.43829	6.3902e-05	1.0411e-08	3.42825e-05	0.000529505	8.56166e-11	0.266951	0.0423068	0.00124467	1.03069e-07	0.000123417	0.00466927
Caa	51	87.0427	83.5616	78.6689	78.9767	78.4682	74.1742	0.941448	***	0.993561	n.s.	0.939191	n.s.	1.28578	1.39417	3.36969	2.71996	3.77916	5.21482	0.0151412	0.0170052	0.0431156	0.0350141	0.0486852	0.0732345	10	13	38	15	23	6	-6.20406	5.71896	5.8027	4.33846	7.30719	0.481746	2.14228	4.40921e-06	1.03197e-05	2.25205e-06	0.00641753	2.79905e-09	0.632937	0.0750044	0.000213847	3.78389e-05	1.27402e-05	0.0345833
Cap	52	87.0427	83.5616	78.6689	78.9767	78.4682	74.1742	0.941448	***	0.993561	n.s.	0.939191	n.s.	1.28578	1.39417	3.36969	2.71996	3.77916	5.21482	0.0151412	0.0170052	0.0431156	0.0350141	0.0486852	0.0732345	10	13	38	15	23	6	-6.20406	5.71896	5.8027	4.33846	7.30719	0.481746	2.14228	4.40921e-06	1.03197e-05	2.25205e-06	0.00641753	2.79905e-09	0.632937	0.0750044	0.000213847	3.78389e-05	1.27402e-05	0.0345833
Cpa	53	87.0427	84.4422	78.2738	79.0307	77.7802	73.7154	0.926951	***	0.984178	n.s.	0.932744	n.s.	1.28578	1.99632	3.20818	2.7684	3.4333	4.41073	0.0151412	0.0240959	0.0412562	0.0356132	0.0446209	0.0623276	10	13	38	15	23	6	-3.78572	5.98518	7.36113	5.694	8.1176	1.23605	2.74356	0.00112144	2.88217e-06	1.5851e-08	0.00129056	1.83197e-09	0.224852	0.0303063	0.010878	1.24058e-05	1.74361e-07	0.00894174
Cpp	54	87.0427	84.4422	78.2738	79.0307	77.7802	73.7154	0.926951	***	0.984178	n.s.	0.932744	n.s.	1.28578	1.99632	3.20818	2.7684	3.4333	4.41073	0.0151412	0.0240959	0.0412562	0.0356132	0.0446209	0.0623276	10	13	38	15	23	6	-3.78572	5.98518	7.36113	5.694	8.1176	1.23605	2.74356	0.00112144	2.88217e-06	1.5851e-08	0.00129056	1.83197e-09	0.224852	0.0303063	0.010878	1.24058e-05	1.74361e-07	0.00894174
ABalaaa	55	102.135	102.516	102.822	103.24	102.549	102.152	1.00298	n.s.	0.993301	n.s.	0.989459	n.s.	1.06681	1.88695	2.06523	1.48396	2.36104	1.5362	0.0107063	0.0187604	0.0202177	0.0146134	0.0232738	0.0157903	10	13	38	15	23	5	0.612884	-1.11651	-0.045344	0.421605	-0.491767	1.10862	1.38349	0.547019	0.275874	0.964135	0.683225	0.627623	0.274949	0.210913	0.71446	0.4921	0.976523	0.744638
ABalaap	56	102.135	102.516	102.822	103.24	102.549	102.152	1.00298	n.s.	0.993301	n.s.	0.989459	n.s.	1.06681	1.88695	2.06523	1.48396	2.36104	1.5362	0.0107063	0.0187604	0.0202177	0.0146134	0.0232738	0.0157903	10	13	38	15	23	5	0.612884	-1.11651	-0.045344	0.421605	-0.491767	1.10862	1.38349	0.547019	0.275874	0.964135	0.683225	0.627623	0.274949	0.210913	0.71446	0.4921	0.976523	0.744638
ABalapa	57	101.399	101.182	102.008	102.064	101.972	100.757	1.00817	n.s.	0.99909	n.s.	0.987185	n.s.	1.29548	1.44918	2.25596	1.88524	2.5088	1.89939	0.0130954	0.0145979	0.0222609	0.0187789	0.0248703	0.0197938	10	13	38	15	23	5	-0.37861	-1.39795	-1.19688	0.452751	-1.52002	0.129996	1.33596	0.708879	0.174089	0.239643	0.666917	0.138081	0.897311	0.224251	0.788819	0.362839	0.379595	0.735124
ABalapp	58	101.399	101.182	102.008	102.064	101.972	100.757	1.00817	n.s.	0.99909	n.s.	0.987185	n.s.	1.29548	1.44918	2.25596	1.88524	2.5088	1.89939	0.0130954	0.0145979	0.0222609	0.0187789	0.0248703	0.0197938	10	13	38	15	23	5	-0.37861	-1.39795	-1.19688	0.452751	-1.52002	0.129996	1.33596	0.708879	0.174089	0.239643	0.666917	0.138081	0.897311	0.224251	0.788819	0.362839	0.379595	0.735124
ABalpaa	59	98.9995	98.5383	98.2596	98.2676	98.2545	95.939	0.997172	n.s.	0.999867	n.s.	0.976304	n.s.	1.27722	1.99823	1.83637	1.31758	2.13698	1.81267	0.0132238	0.0206687	0.0188119	0.0136316	0.0219858	0.0198387	10	13	38	15	23	5	-0.67252	0.416336	0.399127	2.64699	0.442886	0.0233466	2.64869	0.508784	0.681537	0.692999	0.0293033	0.662745	0.981503	0.0415391	0.695099	0.843403	0.798126	0.073829
ABalpap	60	98.9995	98.5383	98.2596	98.2676	98.2545	95.939	0.997172	n.s.	0.999867	n.s.	0.976304	n.s.	1.27722	1.99823	1.83637	1.31758	2.13698	1.81267	0.0132238	0.0206687	0.0188119	0.0136316	0.0219858	0.0198387	10	13	38	15	23	5	-0.67252	0.416336	0.399127	2.64699	0.442886	0.0233466	2.64869	0.508784	0.681537	0.692999	0.0293033	0.662745	0.981503	0.0415391	0.695099	0.843403	0.798126	0.073829
ABalppa	61	99.9523	99.0697	97.9482	98.1589	97.8107	95.939	0.98868	n.s.	0.996453	n.s.	0.977385	n.s.	1.09366	1.98881	1.76177	1.57535	1.89494	1.81267	0.0112154	0.0204609	0.0181051	0.0163164	0.0195841	0.0198387	10	13	38	15	23	5	-1.35565	1.32889	1.8554	3.19287	1.80524	0.613963	2.44759	0.190856	0.197023	0.0758495	0.0127682	0.0870223	0.543355	0.0489343	0.378137	0.40217	0.151699	0.0470186
ABalppp	62	99.9523	99.0697	97.9482	98.1589	97.8107	95.939	0.98868	n.s.	0.996453	n.s.	0.977385	n.s.	1.09366	1.98881	1.76177	1.57535	1.89494	1.81267	0.0112154	0.0204609	0.0181051	0.0163164	0.0195841	0.0198387	10	13	38	15	23	5	-1.35565	1.32889	1.8554	3.19287	1.80524	0.613963	2.44759	0.190856	0.197023	0.0758495	0.0127682	0.0870223	0.543355	0.0489343	0.378137	0.40217	0.151699	0.0470186
ABaraaa	63	99.242	99.6268	100.901	100.162	101.382	100.192	1.01279	*	1.01218	n.s.	1.0003	n.s.	1.12323	1.39436	2.08891	1.29202	2.37949	2.51741	0.011601	0.014265	0.0208388	0.0131143	0.0237256	0.026382	10	13	38	15	23	5	0.732912	-1.04795	-2.79046	-0.475183	-2.47721	-2.04083	-0.0259182	0.471742	0.304785	0.00857778	0.654779	0.0188071	0.0488413	0.980382	0.682334	0.524761	0.0226453	0.735124
ABaraap	64	99.242	99.6268	100.901	100.162	101.382	100.192	1.01279	*	1.01218	n.s.	1.0003	n.s.	1.12323	1.39436	2.08891	1.29202	2.37949	2.51741	0.011601	0.014265	0.0208388	0.0131143	0.0237256	0.026382	10	13	38	15	23	5	0.732912	-1.04795	-2.79046	-0.475183	-2.47721	-2.04083	-0.0259182	0.471742	0.304785	0.00857778	0.654779	0.0188071	0.0488413	0.980382	0.682334	0.524761	0.0226453	0.735124
ABarapa	65	99.4825	99.489	100.058	99.4362	100.464	100.183	1.00572	n.s.	1.01033	n.s.	1.00751	n.s.	1.22458	1.10548	1.73773	1.13596	1.95497	1.0213	0.0126173	0.0113252	0.0174815	0.0116144	0.019671	0.010704	10	13	38	15	23	5	0.0132376	0.124451	-1.91051	-1.26151	-1.36612	-2.04565	-1.37576	0.989581	0.901929	0.0645328	0.24317	0.181092	0.0482225	0.208026	0.989581	0.940433	0.1345	0.389876
ABarapp	66	99.4825	99.489	100.058	99.4362	100.464	100.183	1.00572	n.s.	1.01033	n.s.	1.00751	n.s.	1.22458	1.10548	1.73773	1.13596	1.95497	1.0213	0.0126173	0.0113252	0.0174815	0.0116144	0.019671	0.010704	10	13	38	15	23	5	0.0132376	0.124451	-1.91051	-1.26151	-1.36612	-2.04565	-1.37576	0.989581	0.901929	0.0645328	0.24317	0.181092	0.0482225	0.208026	0.989581	0.940433	0.1345	0.389876
ABarpaa	67	100.905	99.7907	99.2869	99.3039	99.2759	100.164	0.994951	n.s.	0.999718	n.s.	1.00866	n.s.	1.45397	1.50794	1.9496	1.53653	2.21128	2.7845	0.0147696	0.0154016	0.0197652	0.0157309	0.0225162	0.0291894	10	13	38	15	23	5	-1.79274	0.844515	0.82708	-0.284153	0.960809	0.0460822	-0.658104	0.0882619	0.406215	0.414202	0.787835	0.345235	0.963501	0.540483	0.208815	0.613974	0.536026	0.83978
ABarpap	68	100.905	99.7907	99.2869	99.3039	99.2759	100.164	0.994951	n.s.	0.999718	n.s.	1.00866	n.s.	1.45397	1.50794	1.9496	1.53653	2.21128	2.7845	0.0147696	0.0154016	0.0197652	0.0157309	0.0225162	0.0291894	10	13	38	15	23	5	-1.79274	0.844515	0.82708	-0.284153	0.960809	0.0460822	-0.658104	0.0882619	0.406215	0.414202	0.787835	0.345235	0.963501	0.540483	0.208815	0.613974	0.536026	0.83978
ABarppa	69	102.127	100.998	99.9802	100.431	99.6859	99.6655	0.989921	n.s.	0.992576	n.s.	0.992374	n.s.	1.30628	1.48924	1.97744	1.72765	2.10893	2.05415	0.0131105	0.0150288	0.0199085	0.017489	0.0213857	0.021641	10	13	38	15	23	5	-1.93207	0.932139	2.1751	1.32305	1.94644	1.19026	0.750018	0.0672405	0.359841	0.0370955	0.236387	0.0618518	0.242187	0.481548	0.18592	0.570089	0.0844243	0.389876
ABarppp	70	102.127	100.998	99.9802	100.431	99.6859	99.6655	0.989921	n.s.	0.992576	n.s.	0.992374	n.s.	1.30628	1.48924	1.97744	1.72765	2.10893	2.05415	0.0131105	0.0150288	0.0199085	0.017489	0.0213857	0.021641	10	13	38	15	23	5	-1.93207	0.932139	2.1751	1.32305	1.94644	1.19026	0.750018	0.0672405	0.359841	0.0370955	0.236387	0.0618518	0.242187	0.481548	0.18592	0.570089	0.0844243	0.389876
ABplaaa	71	98.0605	96.9865	98.554	98.5828	98.5352	98.7875	1.01616	*	0.999517	n.s.	1.00208	n.s.	1.27053	1.71381	1.77359	1.43436	1.99504	1.08996	0.0132805	0.0180104	0.0181145	0.0147923	0.0204671	0.0115851	10	13	38	15	23	5	-1.72557	-2.64914	-2.45172	-2.64522	-2.82108	0.0855698	-0.334325	0.0991197	0.0141739	0.0206301	0.021765	0.0100955	0.932288	0.745722	0.228919	0.0364471	0.0517058	0.0610867
ABplaap	72	98.0605	96.9865	98.554	98.5828	98.5352	98.7875	1.01616	*	0.999517	n.s.	1.00208	n.s.	1.27053	1.71381	1.77359	1.43436	1.99504	1.08996	0.0132805	0.0180104	0.0181145	0.0147923	0.0204671	0.0115851	10	13	38	15	23	5	-1.72557	-2.64914	-2.45172	-2.64522	-2.82108	0.0855698	-0.334325	0.0991197	0.0141739	0.0206301	0.021765	0.0100955	0.932288	0.745722	0.228919	0.0364471	0.0517058	0.0610867
ABplapa	73	97.3407	97.1596	98.1015	97.9396	98.2071	98.828	1.00969	n.s.	1.00273	n.s.	1.00907	n.s.	1.15162	1.76475	2.06141	2.12333	2.0611	1.79355	0.0121266	0.0185127	0.0211513	0.0220413	0.0212154	0.0190556	10	13	38	15	23	5	-0.296907	-1.0613	-1.6082	-1.77555	-1.58897	-0.384045	-0.914403	0.769516	0.298328	0.118844	0.117877	0.125095	0.703707	0.386899	0.829367	0.522734	0.20824	0.235754
ABplapp	74	97.3407	97.1596	98.1015	97.9396	98.2071	98.828	1.00969	n.s.	1.00273	n.s.	1.00907	n.s.	1.15162	1.76475	2.06141	2.12333	2.0611	1.79355	0.0121266	0.0185127	0.0211513	0.0220413	0.0212154	0.0190556	10	13	38	15	23	5	-0.296907	-1.0613	-1.6082	-1.77555	-1.58897	-0.384045	-0.914403	0.769516	0.298328	0.118844	0.117877	0.125095	0.703707	0.386899	0.829367	0.522734	0.20824	0.235754
ABplpaa	75	99.4922	99.3168	98.9202	99.5736	98.4941	97.319	0.996006	n.s.	0.989159	n.s.	0.977358	n.s.	1.36249	1.39407	2.26812	2.27333	2.20958	1.85116	0.0140368	0.0143065	0.0230796	0.0232111	0.0226775	0.0199727	10	13	38	15	23	5	-0.302992	-0.365245	1.36795	2.18654	0.743183	1.44668	2.2216	0.765067	0.718181	0.180443	0.0726276	0.462414	0.158548	0.0553967	0.829367	0.852818	0.291266	0.152422
ABplpap	76	99.4922	99.3168	98.9202	99.5736	98.4941	97.319	0.996006	n.s.	0.989159	n.s.	0.977358	n.s.	1.36249	1.39407	2.26812	2.27333	2.20958	1.85116	0.0140368	0.0143065	0.0230796	0.0232111	0.0226775	0.0199727	10	13	38	15	23	5	-0.302992	-0.365245	1.36795	2.18654	0.743183	1.44668	2.2216	0.765067	0.718181	0.180443	0.0726276	0.462414	0.158548	0.0553967	0.829367	0.852818	0.291266	0.152422
ABplppa	77	101.144	100.424	99.9645	100.213	99.8027	98.239	0.995423	n.s.	0.99591	n.s.	0.980306	n.s.	1.87797	1.63507	1.87966	2.11112	1.74258	2.28899	0.0190315	0.0165948	0.018927	0.0214176	0.01765	0.0244652	10	13	38	15	23	5	-0.963091	0.298348	1.06942	1.95166	0.841112	0.625701	1.70172	0.348282	0.767835	0.294554	0.101799	0.408681	0.536977	0.136302	0.559648	0.873743	0.429489	0.207885
ABplppp	78	101.144	100.424	99.9645	100.213	99.8027	98.239	0.995423	n.s.	0.99591	n.s.	0.980306	n.s.	1.87797	1.63507	1.87966	2.11112	1.74258	2.28899	0.0190315	0.0165948	0.018927	0.0214176	0.01765	0.0244652	10	13	38	15	23	5	-0.963091	0.298348	1.06942	1.95166	0.841112	0.625701	1.70172	0.348282	0.767835	0.294554	0.101799	0.408681	0.536977	0.136302	0.559648	0.873743	0.429489	0.207885
ABpraaa	79	98.0258	97.5029	97.983	97.6481	98.2014	97.369	1.00492	n.s.	1.00567	n.s.	0.997142	n.s.	0.931418	1.32804	2.10968	1.61318	2.38809	2.25501	0.00973932	0.0138825	0.0216727	0.0167956	0.0245826	0.0243174	10	13	38	15	23	5	-1.10866	-0.261109	-1.12773	0.124703	-0.95483	-0.8523	0.255766	0.280187	0.79607	0.267331	0.905518	0.346493	0.399694	0.807531	0.485323	0.894539	0.404058	0.924582
ABpraap	80	98.0258	97.5029	97.983	97.6481	98.2014	97.369	1.00492	n.s.	1.00567	n.s.	0.997142	n.s.	0.931418	1.32804	2.10968	1.61318	2.38809	2.25501	0.00973932	0.0138825	0.0216727	0.0167956	0.0245826	0.0243174	10	13	38	15	23	5	-1.10866	-0.261109	-1.12773	0.124703	-0.95483	-0.8523	0.255766	0.280187	0.79607	0.267331	0.905518	0.346493	0.399694	0.807531	0.485323	0.894539	0.404058	0.924582
ABprapa	81	97.3233	97.907	98.3136	97.9964	98.5206	98.7875	1.00415	n.s.	1.00535	n.s.	1.00807	n.s.	0.744767	1.96691	1.88907	1.42836	2.14242	1.08996	0.00784382	0.020476	0.0193411	0.0148186	0.0219823	0.0115851	10	13	38	15	23	5	0.982427	-0.135714	-0.870187	-1.20357	-0.649899	-0.904895	-1.2943	0.340386	0.893304	0.391899	0.249701	0.52311	0.371544	0.227633	0.559617	0.940433	0.516909	0.390816
ABprapp	82	97.3233	97.907	98.3136	97.9964	98.5206	98.7875	1.00415	n.s.	1.00535	n.s.	1.00807	n.s.	0.744767	1.96691	1.88907	1.42836	2.14242	1.08996	0.00784382	0.020476	0.0193411	0.0148186	0.0219823	0.0115851	10	13	38	15	23	5	0.982427	-0.135714	-0.870187	-1.20357	-0.649899	-0.904895	-1.2943	0.340386	0.893304	0.391899	0.249701	0.52311	0.371544	0.227633	0.559617	0.940433	0.516909	0.390816
ABprpaa	83	99.7	100.313	99.7865	100.54	99.2954	99.3285	0.994748	n.s.	0.987625	n.s.	0.987954	n.s.	1.39049	1.54052	1.99227	2.04849	1.83471	2.46189	0.0142954	0.0156524	0.0200966	0.0207145	0.0186781	0.0260246	10	13	38	15	23	5	1.00045	-0.332654	1.77504	0.833948	0.983469	1.90599	0.9915	0.328818	0.74211	0.086447	0.440555	0.334168	0.0670909	0.35992	0.555999	0.854417	0.163014	0.581413
ABprpap	84	99.7	100.313	99.7865	100.54	99.2954	99.3285	0.994748	n.s.	0.987625	n.s.	0.987954	n.s.	1.39049	1.54052	1.99227	2.04849	1.83471	2.46189	0.0142954	0.0156524	0.0200966	0.0207145	0.0186781	0.0260246	10	13	38	15	23	5	1.00045	-0.332654	1.77504	0.833948	0.983469	1.90599	0.9915	0.328818	0.74211	0.086447	0.440555	0.334168	0.0670909	0.35992	0.555999	0.854417	0.163014	0.581413
ABprppa	85	100.43	100.303	100.789	101.217	100.51	99.3285	1.00485	n.s.	0.993014	n.s.	0.981341	n.s.	1.1535	1.06137	1.60148	1.16749	1.79992	2.46189	0.0117728	0.0107852	0.0159939	0.0117268	0.0181025	0.0260246	10	13	38	15	23	5	-0.269877	-2.16961	-0.43407	0.855075	-1.23825	1.46888	1.6545	0.790224	0.0393892	0.666989	0.434907	0.224707	0.15055	0.163793	0.842326	0.0939647	0.795518	0.581413
ABprppp	86	100.43	100.303	100.789	101.217	100.51	99.3285	1.00485	n.s.	0.993014	n.s.	0.981341	n.s.	1.1535	1.06137	1.60148	1.16749	1.79992	2.46189	0.0117728	0.0107852	0.0159939	0.0117268	0.0181025	0.0260246	10	13	38	15	23	5	-0.269877	-2.16961	-0.43407	0.855075	-1.23825	1.46888	1.6545	0.790224	0.0393892	0.666989	0.434907	0.224707	0.15055	0.163793	0.842326	0.0939647	0.795518	0.581413
Eal	87	106.438	103.916	91.0198	91.2439	90.8735	83.07	0.875899	***	0.995941	n.s.	0.910417	n.s.	2.03086	2.80934	5.17591	4.25135	5.78772	7.49512	0.0195573	0.0275547	0.0572399	0.0473697	0.0643821	0.093986	10	13	38	15	23	6	-2.49765	9.41363	9.0792	6.60196	11.2583	0.227043	2.51443	0.0209056	1.33476e-09	1.49691e-10	0.00073625	8.0475e-14	0.821697	0.0435943	0.0875769	3.30353e-08	3.70486e-09	0.00549356
Ear	88	106.438	103.916	91.0198	91.2439	90.8735	83.07	0.875899	***	0.995941	n.s.	0.910417	n.s.	2.03086	2.80934	5.17591	4.25135	5.78772	7.49512	0.0195573	0.0275547	0.0572399	0.0473697	0.0643821	0.093986	10	13	38	15	23	6	-2.49765	9.41363	9.0792	6.60196	11.2583	0.227043	2.51443	0.0209056	1.33476e-09	1.49691e-10	0.00073625	8.0475e-14	0.821697	0.0435943	0.0875769	3.30353e-08	3.70486e-09	0.00549356
Epl	89	110.766	107.531	93.2401	93.6003	93.0052	85.8775	0.867102	***	0.993642	n.s.	0.917492	n.s.	2.72881	2.95914	5.83723	4.60085	6.60972	6.59687	0.0252518	0.0280482	0.0630162	0.0499735	0.0718408	0.0800179	10	13	38	15	23	6	-2.71651	9.64796	9.05537	7.69088	11.4043	0.327071	2.62365	0.0132018	9.30826e-10	1.92949e-10	0.000263396	2.34792e-14	0.74552	0.0340553	0.0753279	3.07173e-08	3.82039e-09	0.00267525
Epr	90	110.766	107.531	93.2401	93.6003	93.0052	85.8775	0.867102	***	0.993642	n.s.	0.917492	n.s.	2.72881	2.95914	5.83723	4.60085	6.60972	6.59687	0.0252518	0.0280482	0.0630162	0.0499735	0.0718408	0.0800179	10	13	38	15	23	6	-2.71651	9.64796	9.05537	7.69088	11.4043	0.327071	2.62365	0.0132018	9.30826e-10	1.92949e-10	0.000263396	2.34792e-14	0.74552	0.0340553	0.0753279	3.07173e-08	3.82039e-09	0.00267525
Da	91	118.279	109.716	95.8075	97.4344	94.7464	84.9446	0.873233	***	0.972412	n.s.	0.871813	*	3.5383	5.93207	5.97542	6.30375	5.63749	4.92274	0.0306628	0.0551073	0.0627793	0.0657756	0.0601475	0.0603671	10	13	38	15	23	6	-4.3038	5.30671	7.40308	9.53743	7.28344	1.33883	4.82956	0.000346776	1.53393e-05	1.21967e-07	7.05583e-07	3.62698e-07	0.191538	0.000423769	0.00480532	5.14776e-05	1.20747e-06	3.42208e-05
Dp	92	118.279	109.716	95.8075	97.4344	94.7464	84.9446	0.873233	***	0.972412	n.s.	0.871813	*	3.5383	5.93207	5.97542	6.30375	5.63749	4.92274	0.0306628	0.0551073	0.0627793	0.0657756	0.0601475	0.0603671	10	13	38	15	23	6	-4.3038	5.30671	7.40308	9.53743	7.28344	1.33883	4.82956	0.000346776	1.53393e-05	1.21967e-07	7.05583e-07	3.62698e-07	0.191538	0.000423769	0.00480532	5.14776e-05	1.20747e-06	3.42208e-05
MSaaa	93	116.23	115.75	109.942	109.031	110.497	103.742	0.949825	***	1.01344	n.s.	0.951489	n.s.	1.78616	1.7221	5.84239	2.33316	7.19642	4.75898	0.0157517	0.0151638	0.0534996	0.0217811	0.0658357	0.0481669	10	13	37	14	23	5	-0.648518	8.55395	3.3359	5.5052	5.41421	-0.901963	2.38495	0.524357	9.98611e-09	0.00255061	0.00397743	2.01208e-06	0.374558	0.0659623	0.706426	1.03069e-07	0.00753761	0.0241131
MSaap	94	116.23	115.75	109.942	109.031	110.497	103.742	0.949825	***	1.01344	n.s.	0.951489	n.s.	1.78616	1.7221	5.84239	2.33316	7.19642	4.75898	0.0157517	0.0151638	0.0534996	0.0217811	0.0658357	0.0481669	10	13	37	14	23	5	-0.648518	8.55395	3.3359	5.5052	5.41421	-0.901963	2.38495	0.524357	9.98611e-09	0.00255061	0.00397743	2.01208e-06	0.374558	0.0659623	0.706426	1.03069e-07	0.00753761	0.0241131
MSapa	95	120.294	120.259	113.804	113.135	114.211	106.581	0.946323	***	1.00951	n.s.	0.942069	n.s.	2.17007	2.47856	6.8406	2.90578	8.43351	3.96492	0.0184907	0.0210065	0.0605147	0.0261428	0.0746439	0.0390611	10	13	37	14	23	5	-0.0360133	6.86907	3.2032	7.19244	4.89753	-0.55988	3.38574	0.971619	3.48351e-07	0.00337435	0.000655919	1.14744e-05	0.579785	0.0163243	0.98174	2.46334e-06	0.00968292	0.00530201
MSapp	96	120.294	120.259	113.804	113.135	114.211	106.581	0.946323	***	1.00951	n.s.	0.942069	n.s.	2.17007	2.47856	6.8406	2.90578	8.43351	3.96492	0.0184907	0.0210065	0.0605147	0.0261428	0.0746439	0.0390611	10	13	37	14	23	5	-0.0360133	6.86907	3.2032	7.19244	4.89753	-0.55988	3.38574	0.971619	3.48351e-07	0.00337435	0.000655919	1.14744e-05	0.579785	0.0163243	0.98174	2.46334e-06	0.00968292	0.00530201
MSpaa	97	116.74	115.05	109.656	108.629	110.281	103.301	0.953112	***	1.01521	n.s.	0.950956	n.s.	1.16451	0.874154	5.86474	2.91386	7.08419	5.66281	0.0102247	0.00774413	0.0538446	0.0273031	0.0649359	0.0575595	10	13	37	14	23	5	-3.83136	7.87331	3.18606	4.61831	5.42613	-0.989556	2.01077	0.00144169	8.48335e-07	0.00408834	0.00947355	2.97621e-06	0.329867	0.103173	0.0127131	4.753e-06	0.0114013	0.0468697
MSpap	98	116.74	115.05	109.656	108.629	110.281	103.301	0.953112	***	1.01521	n.s.	0.950956	n.s.	1.16451	0.874154	5.86474	2.91386	7.08419	5.66281	0.0102247	0.00774413	0.0538446	0.0273031	0.0649359	0.0575595	10	13	37	14	23	5	-3.83136	7.87331	3.18606	4.61831	5.42613	-0.989556	2.01077	0.00144169	8.48335e-07	0.00408834	0.00947355	2.97621e-06	0.329867	0.103173	0.0127131	4.753e-06	0.0114013	0.0468697
MSppa	99	120.285	118.373	113.609	111.684	114.782	107.124	0.959762	**	1.02774	n.s.	0.959166	n.s.	2.21375	1.58204	7.24385	3.28314	8.7006	4.87038	0.0188644	0.0136219	0.0641918	0.0299217	0.0766253	0.0477384	10	13	37	14	23	5	-2.31439	6.81786	1.92394	5.06293	3.75302	-1.53708	1.94211	0.0345867	1.64041e-06	0.0660564	0.0057961	0.000508287	0.134532	0.1059	0.124256	7.38186e-06	0.134837	0.0330719
MSppp	100	120.285	118.373	113.609	111.684	114.782	107.124	0.959762	**	1.02774	n.s.	0.959166	n.s.	2.21375	1.58204	7.24385	3.28314	8.7006	4.87038	0.0188644	0.0136219	0.0641918	0.0299217	0.0766253	0.0477384	10	13	37	14	23	5	-2.31439	6.81786	1.92394	5.06293	3.75302	-1.53708	1.94211	0.0345867	1.64041e-06	0.0660564	0.0057961	0.000508287	0.134532	0.1059	0.124256	7.38186e-06	0.134837	0.0330719
Caaa	101	138.785	136.093	127.805	129.996	126.472	121.023	0.939101	***	0.972894	n.s.	0.93098	n.s.	3.28023	3.19268	5.32426	3.57724	5.82356	7.66571	0.0242263	0.0239926	0.0419406	0.0280095	0.0465467	0.0665077	10	11	37	14	23	5	-1.90187	4.49431	6.20897	4.23215	6.37005	2.27998	2.52099	0.0727097	0.00017088	6.5844e-07	0.00967714	6.75049e-07	0.0288167	0.0568764	0.190617	0.000520528	4.41351e-06	0.0468697
Caap	102	138.785	136.093	127.805	129.996	126.472	121.023	0.939101	***	0.972894	n.s.	0.93098	n.s.	3.28023	3.19268	5.32426	3.57724	5.82356	7.66571	0.0242263	0.0239926	0.0419406	0.0280095	0.0465467	0.0665077	10	11	37	14	23	5	-1.90187	4.49431	6.20897	4.23215	6.37005	2.27998	2.52099	0.0727097	0.00017088	6.5844e-07	0.00967714	6.75049e-07	0.0288167	0.0568764	0.190617	0.000520528	4.41351e-06	0.0468697
Capa	103	148.587	143.926	136.378	138.234	135.196	126.373	0.947556	**	0.978022	n.s.	0.91419	n.s.	3.13858	5.12471	6.06204	4.81105	6.56949	10.6904	0.021651	0.0364158	0.0447591	0.035425	0.0491444	0.0888241	10	11	36	14	22	5	-2.53786	2.83127	4.18584	3.49363	4.08849	1.59791	2.39598	0.0213796	0.0100242	0.000304731	0.0182414	0.000605132	0.119536	0.0664315	0.0875769	0.0279547	0.000983002	0.0584293
Capp	104	148.587	143.926	136.378	138.234	135.196	126.373	0.947556	**	0.978022	n.s.	0.91419	n.s.	3.13858	5.12471	6.06204	4.81105	6.56949	10.6904	0.021651	0.0364158	0.0447591	0.035425	0.0491444	0.0888241	10	11	36	14	22	5	-2.53786	2.83127	4.18584	3.49363	4.08849	1.59791	2.39598	0.0213796	0.0100242	0.000304731	0.0182414	0.000605132	0.119536	0.0664315	0.0875769	0.0279547	0.000983002	0.0584293
Cpaa	105	136.371	133.413	126.304	127.975	125.286	120.683	0.946712	***	0.978988	n.s.	0.943014	n.s.	2.52683	3.67288	4.88729	4.28072	5.03955	9.41884	0.0189922	0.0281037	0.0389562	0.0340469	0.0406615	0.0819487	10	12	37	14	23	5	-2.22834	3.48614	5.44406	2.93086	5.34411	1.73101	1.6708	0.0378716	0.00190669	7.26464e-06	0.0368736	1.57971e-05	0.0933602	0.160638	0.130533	0.00547136	3.50829e-05	0.0883146
Cpap	106	136.371	133.413	126.304	127.975	125.286	120.683	0.946712	***	0.978988	n.s.	0.943014	n.s.	2.52683	3.67288	4.88729	4.28072	5.03955	9.41884	0.0189922	0.0281037	0.0389562	0.0340469	0.0406615	0.0819487	10	12	37	14	23	5	-2.22834	3.48614	5.44406	2.93086	5.34411	1.73101	1.6708	0.0378716	0.00190669	7.26464e-06	0.0368736	1.57971e-05	0.0933602	0.160638	0.130533	0.00547136	3.50829e-05	0.0883146
Cppa	107	144.056	142.808	135.039	137.286	133.609	127.283	0.945596	***	0.973211	n.s.	0.927135	n.s.	2.78527	4.89619	5.49714	4.99717	5.42172	9.66851	0.019818	0.0350642	0.0409905	0.0370496	0.0410403	0.0797588	10	11	36	14	22	5	-0.725854	2.77377	4.90653	3.39798	4.47168	2.08215	2.21047	0.478337	0.0111266	6.55284e-05	0.0195371	0.000280509	0.0461003	0.0804689	0.682334	0.030179	0.000227625	0.060162
Cppp	108	144.056	142.808	135.039	137.286	133.609	127.283	0.945596	***	0.973211	n.s.	0.927135	n.s.	2.78527	4.89619	5.49714	4.99717	5.42172	9.66851	0.019818	0.0350642	0.0409905	0.0370496	0.0410403	0.0797588	10	11	36	14	22	5	-0.725854	2.77377	4.90653	3.39798	4.47168	2.08215	2.21047	0.478337	0.0111266	6.55284e-05	0.0195371	0.000280509	0.0461003	0.0804689	0.682334	0.030179	0.000227625	0.060162
ABalaaaa	109	150.053	153.224	154.49	155.315	153.94	153.751	1.00826	n.s.	0.99115	n.s.	0.989935	n.s.	2.4203	3.95388	2.89391	2.50075	3.06243	1.64813	0.0165329	0.026391	0.0188658	0.0163887	0.0201305	0.0113894	10	11	35	14	21	4	2.23881	-1.52948	-0.523716	-0.363687	-0.982148	1.45439	1.47337	0.0390254	0.145609	0.607457	0.722216	0.343254	0.155725	0.181358	0.130533	0.310007	0.751728	0.778389
ABalaaap	110	150.053	153.224	154.421	155.315	153.825	153.751	1.00781	n.s.	0.990412	n.s.	0.989935	n.s.	2.4203	3.95388	3.04976	2.50075	3.28869	1.64813	0.0165329	0.026391	0.0198907	0.0163887	0.0216339	0.0113894	10	11	35	14	21	4	2.23881	-1.52948	-0.432074	-0.363687	-0.921508	1.51848	1.47337	0.0390254	0.145609	0.670989	0.722216	0.372452	0.138615	0.181358	0.130533	0.310007	0.795518	0.778389
ABalaapa	111	150.537	154.166	154.726	155.501	154.21	153.116	1.00364	n.s.	0.991693	n.s.	0.984662	n.s.	2.05873	3.78371	4.05894	3.73495	4.27074	2.57242	0.0140178	0.025101	0.0264204	0.0244477	0.0280241	0.0178505	10	11	35	14	21	4	2.76237	-0.881117	-0.0298263	0.610399	-0.421134	0.94589	1.46495	0.0140467	0.388005	0.976466	0.558377	0.678683	0.351642	0.185722	0.075696	0.595542	0.976523	0.668673
ABalaapp	112	150.537	154.166	154.726	155.501	154.21	153.116	1.00364	n.s.	0.991693	n.s.	0.984662	n.s.	2.05873	3.78371	4.05894	3.73495	4.27074	2.57242	0.0140178	0.025101	0.0264204	0.0244477	0.0280241	0.0178505	10	11	35	14	21	4	2.76237	-0.881117	-0.0298263	0.610399	-0.421134	0.94589	1.46495	0.0140467	0.388005	0.976466	0.558377	0.678683	0.351642	0.185722	0.075696	0.595542	0.976523	0.668673
ABalapaa	113	147.149	150.948	151.597	151.8	151.461	150.364	1.0043	n.s.	0.997764	n.s.	0.990536	n.s.	2.78403	3.03785	3.70971	2.55037	4.37254	4.95075	0.0193928	0.0205826	0.0246457	0.0171008	0.0292128	0.034983	10	11	35	14	21	4	2.99068	-0.746609	-0.387805	0.221357	-0.584426	0.289523	0.559562	0.00751623	0.464192	0.70116	0.836039	0.565385	0.774016	0.609919	0.0455671	0.670876	0.798126	0.871998
ABalapap	114	147.149	150.948	151.597	151.8	151.461	150.364	1.0043	n.s.	0.997764	n.s.	0.990536	n.s.	2.78403	3.03785	3.70971	2.55037	4.37254	4.95075	0.0193928	0.0205826	0.0246457	0.0171008	0.0292128	0.034983	10	11	35	14	21	4	2.99068	-0.746609	-0.387805	0.221357	-0.584426	0.289523	0.559562	0.00751623	0.464192	0.70116	0.836039	0.565385	0.774016	0.609919	0.0455671	0.670876	0.798126	0.871998
ABalappa	115	148.139	151.113	152.199	152.075	152.282	150.282	1.00719	n.s.	1.00136	n.s.	0.988209	n.s.	2.83258	2.57105	3.54322	2.35737	4.20859	3.20812	0.0195991	0.0174008	0.0234464	0.0157782	0.0279658	0.0226815	10	11	35	14	21	4	2.51018	-0.963168	-0.973099	0.466414	-1.10917	-0.186173	1.04046	0.0216685	0.34661	0.338523	0.662655	0.278779	0.853475	0.357218	0.0875769	0.570089	0.462259	0.735124
ABalappp	116	148.139	151.113	152.199	152.075	152.282	150.282	1.00719	n.s.	1.00136	n.s.	0.988209	n.s.	2.83258	2.57105	3.54322	2.35737	4.20859	3.20812	0.0195991	0.0174008	0.0234464	0.0157782	0.0279658	0.0226815	10	11	35	14	21	4	2.51018	-0.963168	-0.973099	0.466414	-1.10917	-0.186173	1.04046	0.0216685	0.34661	0.338523	0.662655	0.278779	0.853475	0.357218	0.0875769	0.570089	0.462259	0.735124
ABalpaaa	117	144.976	145.723	146.442	147.25	145.903	143.676	1.00494	n.s.	0.990853	n.s.	0.975727	n.s.	3.48813	3.56588	3.45662	3.02917	3.6859	3.53022	0.0246616	0.0250264	0.0237727	0.020939	0.0255634	0.0261065	10	11	35	14	21	4	0.484662	-1.13481	-0.134413	0.990392	-0.587757	1.18018	1.84057	0.63349	0.270083	0.894354	0.364147	0.564721	0.246785	0.133717	0.778401	0.4921	0.946963	0.523293
ABalpaap	118	144.976	145.723	146.434	147.25	145.863	143.676	1.00488	n.s.	0.990581	n.s.	0.975727	n.s.	3.48813	3.56588	3.5083	3.02917	3.77695	3.53022	0.0246616	0.0250264	0.0241344	0.020939	0.0262175	0.0261065	10	11	34	14	20	4	0.484662	-1.13481	-0.102677	0.990392	-0.577466	1.1855	1.84057	0.63349	0.270083	0.919159	0.364147	0.571308	0.244736	0.133717	0.778401	0.4921	0.962245	0.523293
ABalpapa	119	144.266	145.056	144.523	144.394	144.608	142.988	0.996321	n.s.	1.00148	n.s.	0.990256	n.s.	3.46135	3.0361	2.79069	1.76931	3.34448	2.30448	0.0245927	0.0214062	0.0194476	0.0124721	0.0234033	0.017124	10	11	35	14	21	4	0.554008	0.642357	0.382917	1.40578	0.518267	-0.245563	1.12961	0.586373	0.530202	0.705414	0.201837	0.611503	0.807603	0.320798	0.738678	0.721362	0.798126	0.359232
ABalpapp	120	144.266	145.056	144.523	144.394	144.608	142.988	0.996321	n.s.	1.00148	n.s.	0.990256	n.s.	3.46135	3.0361	2.79069	1.76931	3.34448	2.30448	0.0245927	0.0214062	0.0194476	0.0124721	0.0234033	0.017124	10	11	35	14	21	4	0.554008	0.642357	0.382917	1.40578	0.518267	-0.245563	1.12961	0.586373	0.530202	0.705414	0.201837	0.611503	0.807603	0.320798	0.738678	0.721362	0.798126	0.359232
ABalppaa	121	148.365	148.122	147.904	148.586	147.45	144.854	0.998534	n.s.	0.992355	n.s.	0.974886	n.s.	3.14437	3.95267	3.01112	2.66894	3.20025	3.11732	0.0217233	0.0272918	0.0205039	0.018283	0.0219623	0.0228654	10	11	35	14	21	4	-0.156854	-0.334397	0.486096	1.66516	0.167518	1.1379	2.17699	0.877041	0.742221	0.633091	0.140875	0.869385	0.26382	0.0896584	0.905032	0.854417	0.764341	0.276058
ABalppap	122	148.365	148.122	147.904	148.586	147.45	144.854	0.998534	n.s.	0.992355	n.s.	0.974886	n.s.	3.14437	3.95267	3.01112	2.66894	3.20025	3.11732	0.0217233	0.0272918	0.0205039	0.018283	0.0219623	0.0228654	10	11	35	14	21	4	-0.156854	-0.334397	0.486096	1.66516	0.167518	1.1379	2.17699	0.877041	0.742221	0.633091	0.140875	0.869385	0.26382	0.0896584	0.905032	0.854417	0.764341	0.276058
ABalpppa	123	145.008	145.472	144.501	145.011	144.161	141.891	0.993324	n.s.	0.994139	n.s.	0.978481	n.s.	2.113	3.31255	3.1485	3.03384	3.25054	4.41502	0.0149358	0.0232885	0.0219444	0.021295	0.0228164	0.0330604	10	11	35	14	21	4	0.385977	0.358511	1.07032	1.47824	0.858159	0.788974	1.3269	0.704263	0.723603	0.297172	0.208575	0.403398	0.436456	0.257802	0.788819	0.852818	0.429489	0.364536
ABalpppp	124	145.008	145.472	144.501	145.011	144.161	141.891	0.993324	n.s.	0.994139	n.s.	0.978481	n.s.	2.113	3.31255	3.1485	3.03384	3.25054	4.41502	0.0149358	0.0232885	0.0219444	0.021295	0.0228164	0.0330604	10	11	35	14	21	4	0.385977	0.358511	1.07032	1.47824	0.858159	0.788974	1.3269	0.704263	0.723603	0.297172	0.208575	0.403398	0.436456	0.257802	0.788819	0.852818	0.429489	0.364536
ABaraaaa	125	146.454	148.865	151.211	150.95	151.386	152.009	1.01576	.	1.00289	n.s.	1.00702	n.s.	3.19373	2.6964	3.92768	3.16756	4.4299	4.2212	0.0223523	0.0185246	0.0261603	0.0213589	0.0296107	0.0295049	10	11	35	14	21	4	1.86014	-1.7761	-1.99523	-1.39003	-2.23505	-0.338946	-0.465807	0.0795284	0.0890587	0.0554428	0.238066	0.034753	0.736812	0.665479	0.203007	0.198131	0.118039	0.389876
ABaraaap	126	146.454	148.865	151.211	150.95	151.386	152.009	1.01576	.	1.00289	n.s.	1.00702	n.s.	3.19373	2.6964	3.92768	3.16756	4.4299	4.2212	0.0223523	0.0185246	0.0261603	0.0213589	0.0296107	0.0295049	10	11	35	14	21	4	1.86014	-1.7761	-1.99523	-1.39003	-2.23505	-0.338946	-0.465807	0.0795284	0.0890587	0.0554428	0.238066	0.034753	0.736812	0.665479	0.203007	0.198131	0.118039	0.389876
ABaraapa	127	144.516	145.47	149.479	149.635	149.375	148.964	1.02756	***	0.998264	n.s.	0.995517	n.s.	3.28798	1.78472	3.24531	2.09816	3.87487	4.77114	0.0233205	0.0125475	0.0218659	0.0142723	0.0262494	0.0340307	10	11	35	14	21	4	0.814709	-5.35873	-3.89612	-1.42871	-5.21697	0.25601	0.273724	0.429286	1.97473e-05	0.0005135	0.240244	1.09778e-05	0.799584	0.800374	0.650636	6.40977e-05	0.0015642	0.389876
ABaraapp	128	144.516	145.47	149.479	149.635	149.375	148.964	1.02756	***	0.998264	n.s.	0.995517	n.s.	3.28798	1.78472	3.24531	2.09816	3.87487	4.77114	0.0233205	0.0125475	0.0218659	0.0142723	0.0262494	0.0340307	10	11	35	14	21	4	0.814709	-5.35873	-3.89612	-1.42871	-5.21697	0.25601	0.273724	0.429286	1.97473e-05	0.0005135	0.240244	1.09778e-05	0.799584	0.800374	0.650636	6.40977e-05	0.0015642	0.389876
ABarapaa	129	146.459	147.255	149.234	148.453	149.755	150.099	1.01344	.	1.00877	n.s.	1.01109	n.s.	2.89605	2.29527	3.49282	3.02275	3.75358	2.18379	0.0202681	0.0159414	0.0235721	0.0207252	0.0253632	0.0154583	10	11	35	14	21	4	0.692775	-1.12686	-2.33142	-2.20049	-2.17605	-1.13112	-1.2118	0.497713	0.27143	0.0268627	0.0730682	0.0388901	0.266492	0.266476	0.691557	0.4921	0.0625742	0.152422
ABarapap	130	146.459	147.255	149.234	148.453	149.755	150.099	1.01344	.	1.00877	n.s.	1.01109	n.s.	2.89605	2.29527	3.49282	3.02275	3.75358	2.18379	0.0202681	0.0159414	0.0235721	0.0207252	0.0253632	0.0154583	10	11	35	14	21	4	0.692775	-1.12686	-2.33142	-2.20049	-2.17605	-1.13112	-1.2118	0.497713	0.27143	0.0268627	0.0730682	0.0388901	0.266492	0.266476	0.691557	0.4921	0.0625742	0.152422
ABarappa	131	146.679	149.973	151.018	150.542	151.336	152.019	1.00697	n.s.	1.00527	n.s.	1.00981	n.s.	3.26904	2.21379	2.81533	2.28301	3.13396	4.1646	0.0228442	0.0150968	0.0187755	0.0154361	0.0209552	0.0291075	10	11	35	14	21	4	2.67653	-0.629455	-1.42648	-0.935765	-1.27552	-0.866275	-0.680674	0.0168002	0.535557	0.165153	0.407268	0.215961	0.392657	0.538067	0.0792665	0.721362	0.276542	0.560354
ABarappp	132	146.679	149.973	151.018	150.542	151.336	152.019	1.00697	n.s.	1.00527	n.s.	1.00981	n.s.	3.26904	2.21379	2.81533	2.28301	3.13396	4.1646	0.0228442	0.0150968	0.0187755	0.0154361	0.0209552	0.0291075	10	11	35	14	21	4	2.67653	-0.629455	-1.42648	-0.935765	-1.27552	-0.866275	-0.680674	0.0168002	0.535557	0.165153	0.407268	0.215961	0.392657	0.538067	0.0792665	0.721362	0.276542	0.560354
ABarpaaa	133	143.565	144.162	145.316	145.066	145.492	146.649	1.00801	n.s.	1.00293	n.s.	1.01091	n.s.	2.96849	2.7928	3.24573	3.2316	3.32767	4.42981	0.0211938	0.0198129	0.0224998	0.0226745	0.0231578	0.0320947	10	11	34	14	20	4	0.473467	-0.74941	-1.18298	-1.04958	-1.14342	-0.373124	-0.665908	0.641413	0.461292	0.2484	0.354468	0.266694	0.711802	0.542249	0.778401	0.670876	0.387269	0.517043
ABarpaap	134	143.565	144.162	145.316	145.066	145.492	146.649	1.00801	n.s.	1.00293	n.s.	1.01091	n.s.	2.96849	2.7928	3.24573	3.2316	3.32767	4.42981	0.0211938	0.0198129	0.0224998	0.0226745	0.0231578	0.0320947	10	11	34	14	20	4	0.473467	-0.74941	-1.18298	-1.04958	-1.14342	-0.373124	-0.665908	0.641413	0.461292	0.2484	0.354468	0.266694	0.711802	0.542249	0.778401	0.670876	0.387269	0.517043
ABarpapa	135	145.982	146.539	147.326	147.125	147.461	147.809	1.00537	n.s.	1.00228	n.s.	1.00465	n.s.	2.19064	3.52007	3.4413	2.96716	3.78975	2.54043	0.0153814	0.0245673	0.0235252	0.0205278	0.026006	0.0182615	10	11	35	14	21	4	0.439227	-0.441979	-0.685043	-0.766989	-0.650473	-0.293389	-0.456781	0.666054	0.663346	0.500533	0.466399	0.524356	0.771117	0.665012	0.778401	0.83346	0.631246	0.607258
ABarpapp	136	145.982	146.539	147.326	147.125	147.461	147.809	1.00537	n.s.	1.00228	n.s.	1.00465	n.s.	2.19064	3.52007	3.4413	2.96716	3.78975	2.54043	0.0153814	0.0245673	0.0235252	0.0205278	0.026006	0.0182615	10	11	35	14	21	4	0.439227	-0.441979	-0.685043	-0.766989	-0.650473	-0.293389	-0.456781	0.666054	0.663346	0.500533	0.466399	0.524356	0.771117	0.665012	0.778401	0.83346	0.631246	0.607258
ABarppaa	137	146.452	146.212	147.246	147.517	147.066	148.434	1.00707	n.s.	0.996945	n.s.	1.00622	n.s.	2.3385	2.07892	3.10948	3.12041	3.16587	3.45332	0.0163669	0.0145417	0.0212684	0.0215307	0.0217831	0.024719	10	11	35	14	21	4	-0.247127	-1.25047	-0.915324	-1.20974	-1.26419	0.416204	-0.47855	0.807584	0.223976	0.367776	0.29583	0.217674	0.6804	0.654564	0.851474	0.439082	0.495371	0.444891
ABarppap	138	146.452	146.212	147.246	147.517	147.066	148.434	1.00707	n.s.	0.996945	n.s.	1.00622	n.s.	2.3385	2.07892	3.10948	3.12041	3.16587	3.45332	0.0163669	0.0145417	0.0212684	0.0215307	0.0217831	0.024719	10	11	35	14	21	4	-0.247127	-1.25047	-0.915324	-1.20974	-1.26419	0.416204	-0.47855	0.807584	0.223976	0.367776	0.29583	0.217674	0.6804	0.654564	0.851474	0.439082	0.495371	0.444891
ABarpppa	139	147.406	146.916	147.491	148.025	147.135	147.092	1.00392	n.s.	0.993985	n.s.	0.993694	n.s.	3.2113	2.83007	3.22077	3.02477	3.36969	1.08749	0.0223299	0.019701	0.021993	0.0207991	0.0231746	0.00785534	10	11	35	14	21	4	-0.37007	-0.944068	-0.194744	-0.17418	-0.56857	0.814712	0.958111	0.715629	0.355283	0.847246	0.864457	0.57635	0.421649	0.353675	0.788819	0.570089	0.901907	0.892046
ABarpppp	140	147.406	146.916	147.491	148.025	147.135	147.092	1.00392	n.s.	0.993985	n.s.	0.993694	n.s.	3.2113	2.83007	3.22077	3.02477	3.36969	1.08749	0.0223299	0.019701	0.021993	0.0207991	0.0231746	0.00785534	10	11	35	14	21	4	-0.37007	-0.944068	-0.194744	-0.17418	-0.56857	0.814712	0.958111	0.715629	0.355283	0.847246	0.864457	0.57635	0.421649	0.353675	0.788819	0.570089	0.901907	0.892046
ABplaaaa	141	144.323	146.078	149.344	148.995	149.576	152.077	1.02236	*	1.0039	n.s.	1.02069	n.s.	2.84001	2.87465	3.2542	3.02507	3.45146	4.15035	0.0201701	0.0201261	0.0219456	0.0206657	0.0233496	0.0289968	10	11	35	14	21	4	1.4055	-2.46117	-3.04673	-2.66758	-3.18147	-0.526064	-1.38385	0.176139	0.0221231	0.00555699	0.0545158	0.00496691	0.602655	0.23931	0.359695	0.0554478	0.0150724	0.124424
ABplaaap	142	144.323	146.078	149.344	148.995	149.576	152.077	1.02236	*	1.0039	n.s.	1.02069	n.s.	2.84001	2.87465	3.2542	3.02507	3.45146	4.15035	0.0201701	0.0201261	0.0219456	0.0206657	0.0233496	0.0289968	10	11	35	14	21	4	1.4055	-2.46117	-3.04673	-2.66758	-3.18147	-0.526064	-1.38385	0.176139	0.0221231	0.00555699	0.0545158	0.00496691	0.602655	0.23931	0.359695	0.0554478	0.0150724	0.124424
ABplaapa	143	141.664	142.622	145.153	145.733	144.767	145.48	1.01775	*	0.993372	n.s.	0.998263	n.s.	2.38987	2.25203	3.44992	3.42823	3.49315	3.99289	0.0172918	0.016149	0.0239371	0.0239441	0.0244167	0.0291617	10	11	35	14	21	4	0.943205	-2.72778	-2.10104	-1.35517	-2.82802	0.810477	0.115208	0.357713	0.0121637	0.044609	0.251814	0.00889246	0.42441	0.913403	0.559648	0.0321122	0.0992424	0.390816
ABplaapp	144	141.664	142.622	145.153	145.733	144.767	145.48	1.01775	*	0.993372	n.s.	0.998263	n.s.	2.38987	2.25203	3.44992	3.42823	3.49315	3.99289	0.0172918	0.016149	0.0239371	0.0239441	0.0244167	0.0291617	10	11	35	14	21	4	0.943205	-2.72778	-2.10104	-1.35517	-2.82802	0.810477	0.115208	0.357713	0.0121637	0.044609	0.251814	0.00889246	0.42441	0.913403	0.559648	0.0321122	0.0992424	0.390816
ABplapaa	145	141.71	145.208	146.165	145.26	146.768	146.673	1.00659	n.s.	1.01038	n.s.	1.00973	n.s.	2.29547	2.11579	3.13723	3.09675	3.08917	3.78406	0.0166033	0.0149019	0.021617	0.0216994	0.0212985	0.0274117	10	11	35	14	21	4	3.61968	-0.0496351	-1.68094	-0.733802	-1.15339	-1.41294	-0.684365	0.0019039	0.960848	0.104061	0.506771	0.259627	0.168705	0.529469	0.0153898	0.960848	0.189028	0.637485
ABplapap	146	141.71	145.208	146.165	145.26	146.768	146.673	1.00659	n.s.	1.01038	n.s.	1.00973	n.s.	2.29547	2.11579	3.13723	3.09675	3.08917	3.78406	0.0166033	0.0149019	0.021617	0.0216994	0.0212985	0.0274117	10	11	35	14	21	4	3.61968	-0.0496351	-1.68094	-0.733802	-1.15339	-1.41294	-0.684365	0.0019039	0.960848	0.104061	0.506771	0.259627	0.168705	0.529469	0.0153898	0.960848	0.189028	0.637485
ABplappa	147	144.075	144.849	146.976	146.703	147.157	147.843	1.01468	n.s.	1.0031	n.s.	1.00777	n.s.	2.23879	2.88582	3.84572	3.05305	4.35854	3.17861	0.0159275	0.0203758	0.0263526	0.0211827	0.0299709	0.0228437	10	11	35	14	21	4	0.689451	-1.55463	-1.79083	-1.65233	-1.95824	-0.362341	-0.637789	0.499062	0.134209	0.0840967	0.160146	0.0628616	0.719416	0.55329	0.691557	0.292016	0.162436	0.301634
ABplappp	148	144.075	144.849	146.976	146.703	147.157	147.843	1.01468	n.s.	1.0031	n.s.	1.00777	n.s.	2.23879	2.88582	3.84572	3.05305	4.35854	3.17861	0.0159275	0.0203758	0.0263526	0.0211827	0.0299709	0.0228437	10	11	35	14	21	4	0.689451	-1.55463	-1.79083	-1.65233	-1.95824	-0.362341	-0.637789	0.499062	0.134209	0.0840967	0.160146	0.0628616	0.719416	0.55329	0.691557	0.292016	0.162436	0.301634
ABplpaaa	149	147.199	148.835	148.011	148.721	147.537	145.933	0.994458	n.s.	0.992041	n.s.	0.981252	n.s.	3.49575	2.73492	3.47547	3.21726	3.63561	3.01794	0.0243422	0.0187931	0.0236489	0.0220192	0.0249354	0.0219729	10	11	35	14	21	4	1.1867	0.0962047	1.13457	1.68812	0.81465	1.01173	1.60543	0.251619	0.924198	0.266926	0.153051	0.424362	0.319684	0.167724	0.473923	0.943254	0.404058	0.29398
ABplpaap	150	147.199	148.835	148.011	148.721	147.537	145.933	0.994458	n.s.	0.992041	n.s.	0.981252	n.s.	3.49575	2.73492	3.47547	3.21726	3.63561	3.01794	0.0243422	0.0187931	0.0236489	0.0220192	0.0249354	0.0219729	10	11	35	14	21	4	1.1867	0.0962047	1.13457	1.68812	0.81465	1.01173	1.60543	0.251619	0.924198	0.266926	0.153051	0.424362	0.319684	0.167724	0.473923	0.943254	0.404058	0.29398
ABplpapa	151	145.492	146.983	146.573	146.845	146.391	145.298	0.997206	n.s.	0.996913	n.s.	0.989464	n.s.	2.43915	2.62488	3.77036	3.57313	3.9726	3.55984	0.017184	0.0182642	0.0259072	0.0247672	0.0274599	0.0260316	10	11	35	14	21	4	1.34976	0.111825	0.504276	0.865483	0.404118	0.351416	0.76598	0.192967	0.911935	0.617993	0.432864	0.689677	0.727732	0.479062	0.378137	0.940433	0.755325	0.581413
ABplpapp	152	145.492	146.983	146.573	146.845	146.391	145.298	0.997206	n.s.	0.996913	n.s.	0.989464	n.s.	2.43915	2.62488	3.77036	3.57313	3.9726	3.55984	0.017184	0.0182642	0.0259072	0.0247672	0.0274599	0.0260316	10	11	35	14	21	4	1.34976	0.111825	0.504276	0.865483	0.404118	0.351416	0.76598	0.192967	0.911935	0.617993	0.432864	0.689677	0.727732	0.479062	0.378137	0.940433	0.755325	0.581413
ABplppaa	153	150.742	153.803	152.127	152.278	152.027	151.957	0.989109	n.s.	0.998358	n.s.	0.997894	n.s.	3.74138	3.49964	2.85862	2.93037	2.8782	4.40487	0.0254403	0.0232713	0.0189252	0.0195873	0.0191575	0.0307993	10	11	35	14	21	4	1.93073	1.16055	1.4456	0.755755	1.44336	0.249121	0.137164	0.0690013	0.259835	0.166204	0.487723	0.170251	0.805108	0.897872	0.18592	0.489974	0.276542	0.626611
ABplppap	154	150.742	153.803	152.127	152.278	152.027	151.957	0.989109	n.s.	0.998358	n.s.	0.997894	n.s.	3.74138	3.49964	2.85862	2.93037	2.8782	4.40487	0.0254403	0.0232713	0.0189252	0.0195873	0.0191575	0.0307993	10	11	35	14	21	4	1.93073	1.16055	1.4456	0.755755	1.44336	0.249121	0.137164	0.0690013	0.259835	0.166204	0.487723	0.170251	0.805108	0.897872	0.18592	0.489974	0.276542	0.626611
ABplpppa	155	148.107	149.913	149.504	149.392	149.58	148.286	0.997277	n.s.	1.00126	n.s.	0.992595	n.s.	3.96462	3.01844	2.92876	2.84797	3.04877	4.47324	0.0274378	0.0205923	0.0197297	0.0194042	0.0206249	0.0320517	10	11	35	14	21	4	1.16544	0.43909	0.295543	0.673853	0.39409	-0.185744	0.468214	0.260134	0.665084	0.770537	0.536974	0.6986	0.853924	0.665713	0.474484	0.83346	0.855162	0.657736
ABplpppa.1	156	148.107	149.913	149.504	149.392	149.58	148.286	0.997277	n.s.	1.00126	n.s.	0.992595	n.s.	3.96462	3.01844	2.92876	2.84797	3.04877	4.47324	0.0274378	0.0205923	0.0197297	0.0194042	0.0206249	0.0320517	10	11	35	14	21	4	1.16544	0.43909	0.295543	0.673853	0.39409	-0.185744	0.468214	0.260134	0.665084	0.770537	0.536974	0.6986	0.853924	0.665713	0.474484	0.83346	0.855162	0.657736
ABplpppp	157	148.107	149.913	149.504	149.392	149.58	148.286	0.997277	n.s.	1.00126	n.s.	0.992595	n.s.	3.96462	3.01844	2.92876	2.84797	3.04877	4.47324	0.0274378	0.0205923	0.0197297	0.0194042	0.0206249	0.0320517	10	11	35	14	21	4	1.16544	0.43909	0.295543	0.673853	0.39409	-0.185744	0.468214	0.260134	0.665084	0.770537	0.536974	0.6986	0.853924	0.665713	0.474484	0.83346	0.855162	0.657736
ABpraaaa	158	145.959	147.906	148.732	148.426	148.936	149.123	1.00558	n.s.	1.00343	n.s.	1.00469	n.s.	2.27947	2.91748	3.61035	3.65567	3.65557	4.81047	0.0160076	0.0201735	0.0244477	0.0250694	0.0248369	0.0342746	10	11	35	14	21	4	1.71195	-0.395436	-0.867073	-0.47502	-0.771271	-0.404161	-0.268356	0.103517	0.696168	0.394208	0.660551	0.449327	0.689163	0.801552	0.233515	0.850057	0.516909	0.735124
ABpraaap	159	145.959	147.906	148.732	148.426	148.936	149.123	1.00558	n.s.	1.00343	n.s.	1.00469	n.s.	2.27947	2.91748	3.61035	3.65567	3.65557	4.81047	0.0160076	0.0201735	0.0244477	0.0250694	0.0248369	0.0342746	10	11	35	14	21	4	1.71195	-0.395436	-0.867073	-0.47502	-0.771271	-0.404161	-0.268356	0.103517	0.696168	0.394208	0.660551	0.449327	0.689163	0.801552	0.233515	0.850057	0.516909	0.735124
ABpraapa	160	143.078	143.542	145.805	146.187	145.55	145.451	1.01577	.	0.995646	n.s.	0.994967	n.s.	2.08677	2.6908	3.89808	4.32292	3.67619	3.61234	0.0149494	0.0191718	0.0269259	0.0300993	0.0255579	0.0263876	10	11	35	14	21	4	0.443227	-1.87369	-1.76049	-0.964374	-2.16546	0.452569	0.343137	0.662721	0.0743053	0.0898783	0.386123	0.0403345	0.654792	0.74372	0.778401	0.169109	0.166317	0.546772
ABpraapp	161	143.078	143.542	145.805	146.187	145.55	145.451	1.01577	.	0.995646	n.s.	0.994967	n.s.	2.08677	2.6908	3.89808	4.32292	3.67619	3.61234	0.0149494	0.0191718	0.0269259	0.0300993	0.0255579	0.0263876	10	11	35	14	21	4	0.443227	-1.87369	-1.76049	-0.964374	-2.16546	0.452569	0.343137	0.662721	0.0743053	0.0898783	0.386123	0.0403345	0.654792	0.74372	0.778401	0.169109	0.166317	0.546772
ABprapaa	162	142.38	145.871	147.68	147.002	148.133	146.63	1.0124	n.s.	1.0077	n.s.	0.997472	n.s.	1.91592	2.7716	3.17356	2.86215	3.35546	2.80653	0.0137929	0.0194321	0.0216429	0.0198179	0.0229214	0.0203365	10	11	35	14	21	4	3.38309	-0.997496	-2.03537	-0.464412	-1.8216	-1.06844	0.232492	0.00335316	0.329402	0.0529358	0.660792	0.0843059	0.293602	0.825468	0.0228006	0.557449	0.115179	0.735124
ABprapap	163	142.38	145.871	147.68	147.002	148.133	146.63	1.0124	n.s.	1.0077	n.s.	0.997472	n.s.	1.91592	2.7716	3.17356	2.86215	3.35546	2.80653	0.0137929	0.0194321	0.0216429	0.0198179	0.0229214	0.0203365	10	11	35	14	21	4	3.38309	-0.997496	-2.03537	-0.464412	-1.8216	-1.06844	0.232492	0.00335316	0.329402	0.0529358	0.660792	0.0843059	0.293602	0.825468	0.0228006	0.557449	0.115179	0.735124
ABprappa	164	144.312	147.459	147.962	147.196	148.473	147.78	1.00341	n.s.	1.00868	n.s.	1.00397	n.s.	1.63148	3.88225	3.01017	3.08842	2.9187	1.83235	0.0115879	0.0269261	0.0204895	0.0213564	0.0198921	0.0131741	10	11	35	14	21	4	2.46009	0.183623	-0.761139	-0.216164	-0.394388	-1.22513	-0.47384	0.0278461	0.856271	0.457583	0.832629	0.699242	0.231147	0.647483	0.103887	0.940433	0.584526	0.871998
ABprappp	165	144.312	147.459	147.962	147.196	148.473	147.78	1.00341	n.s.	1.00868	n.s.	1.00397	n.s.	1.63148	3.88225	3.01017	3.08842	2.9187	1.83235	0.0115879	0.0269261	0.0204895	0.0213564	0.0198921	0.0131741	10	11	35	14	21	4	2.46009	0.183623	-0.761139	-0.216164	-0.394388	-1.22513	-0.47384	0.0278461	0.856271	0.457583	0.832629	0.699242	0.231147	0.647483	0.103887	0.940433	0.584526	0.871998
ABprpaaa	166	147.389	149.287	149.568	150.036	149.256	146.765	1.00188	n.s.	0.994799	n.s.	0.978199	n.s.	1.79546	2.62103	3.0455	2.93605	3.14779	6.656	0.0124863	0.0179561	0.0205074	0.0199184	0.021341	0.0481859	10	11	35	14	21	4	1.95012	-0.672746	0.0297365	0.737203	-0.297945	0.748278	0.956598	0.067148	0.50794	0.976523	0.509331	0.768934	0.460246	0.402755	0.18592	0.705162	0.976523	0.637485
ABprpaap	167	147.389	149.287	149.568	150.036	149.256	146.765	1.00188	n.s.	0.994799	n.s.	0.978199	n.s.	1.79546	2.62103	3.0455	2.93605	3.14779	6.656	0.0124863	0.0179561	0.0205074	0.0199184	0.021341	0.0481859	10	11	35	14	21	4	1.95012	-0.672746	0.0297365	0.737203	-0.297945	0.748278	0.956598	0.067148	0.50794	0.976523	0.509331	0.768934	0.460246	0.402755	0.18592	0.705162	0.976523	0.637485
ABprpapa	168	145.961	149.188	147.73	149.008	146.878	146.077	0.99023	n.s.	0.985705	n.s.	0.980328	n.s.	1.91489	2.49472	3.18659	3.65964	2.57903	4.73854	0.0134472	0.0171021	0.0217244	0.0249986	0.017768	0.0344661	10	11	35	14	21	4	3.34118	0.145501	2.45851	1.25141	1.57548	1.88762	1.14358	0.00352587	0.885603	0.0227051	0.285472	0.129922	0.0726491	0.315395	0.0228006	0.940433	0.0541641	0.436076
ABprpapp	169	145.961	149.188	147.73	149.008	146.878	146.077	0.99023	n.s.	0.985705	n.s.	0.980328	n.s.	1.91489	2.49472	3.18659	3.65964	2.57903	4.73854	0.0134472	0.0171021	0.0217244	0.0249986	0.017768	0.0344661	10	11	35	14	21	4	3.34118	0.145501	2.45851	1.25141	1.57548	1.88762	1.14358	0.00352587	0.885603	0.0227051	0.285472	0.129922	0.0726491	0.315395	0.0228006	0.940433	0.0541641	0.436076
ABprppaa	170	150.75	152.958	153.239	153.834	152.842	151.504	1.00184	n.s.	0.993553	n.s.	0.984859	n.s.	2.36485	2.85341	3.63065	3.45367	3.77393	5.01932	0.0160794	0.0190789	0.023862	0.0228516	0.0249857	0.0352005	10	11	35	14	21	4	1.93705	-0.694282	0.0971367	0.547757	-0.265909	0.801719	0.871074	0.067866	0.494485	0.923367	0.614966	0.792883	0.429083	0.434653	0.18592	0.704374	0.962245	0.718695
ABprppap	171	150.75	152.958	153.239	153.834	152.842	151.504	1.00184	n.s.	0.993553	n.s.	0.984859	n.s.	2.36485	2.85341	3.63065	3.45367	3.77393	5.01932	0.0160794	0.0190789	0.023862	0.0228516	0.0249857	0.0352005	10	11	35	14	21	4	1.93705	-0.694282	0.0971367	0.547757	-0.265909	0.801719	0.871074	0.067866	0.494485	0.923367	0.614966	0.792883	0.429083	0.434653	0.18592	0.704374	0.962245	0.718695
ABprpppa	172	147.406	149.667	150.357	150.525	150.245	147.953	1.00461	n.s.	0.99814	n.s.	0.982915	n.s.	2.63202	3.12192	2.85409	3.23634	2.64705	4.79558	0.0183019	0.0213332	0.0191177	0.0218843	0.017828	0.0344386	10	11	35	14	21	4	1.79923	-0.670889	-0.523026	0.665429	-0.651996	0.269206	1.00891	0.0879641	0.509284	0.607444	0.542463	0.523879	0.790065	0.372634	0.208815	0.705162	0.751728	0.657736
ABprpppp	173	147.406	149.667	150.357	150.525	150.245	147.953	1.00461	n.s.	0.99814	n.s.	0.982915	n.s.	2.63202	3.12192	2.85409	3.23634	2.64705	4.79558	0.0183019	0.0213332	0.0191177	0.0218843	0.017828	0.0344386	10	11	35	14	21	4	1.79923	-0.670889	-0.523026	0.665429	-0.651996	0.269206	1.00891	0.0879641	0.509284	0.607444	0.542463	0.523879	0.790065	0.372634	0.208815	0.705162	0.751728	0.657736
MSaaaa	174	162.72	165.424	157.171	157.108	157.214	150.446	0.950106	***	1.00068	n.s.	0.957595	n.s.	3.20963	2.64166	3.97871	2.6714	4.75465	6.78518	0.020218	0.0163682	0.0255007	0.0173072	0.0306211	0.0479193	10	10	34	14	20	4	2.0573	7.56794	6.07182	4.28702	7.65201	-0.0833168	1.92164	0.0550031	3.0167e-07	1.61431e-06	0.0183721	1.11742e-07	0.934138	0.142759	0.169197	2.29733e-06	9.68588e-06	0.0584293
MSaaap	175	162.72	165.424	157.171	157.108	157.214	150.446	0.950106	***	1.00068	n.s.	0.957595	n.s.	3.20963	2.64166	3.97871	2.6714	4.75465	6.78518	0.020218	0.0163682	0.0255007	0.0173072	0.0306211	0.0479193	10	10	34	14	20	4	2.0573	7.56794	6.07182	4.28702	7.65201	-0.0833168	1.92164	0.0550031	3.0167e-07	1.61431e-06	0.0183721	1.11742e-07	0.934138	0.142759	0.169197	2.29733e-06	9.68588e-06	0.0584293
MSaapa	176	162.951	166.052	157.369	157.006	157.623	151.081	0.947705	***	1.00393	n.s.	0.962263	n.s.	3.72415	3.0002	4.22799	3.37813	4.80359	7.1387	0.0234258	0.0185195	0.0270644	0.0219002	0.0308562	0.0502041	10	10	34	14	20	4	2.05085	6.90764	5.88201	4.05374	7.2722	-0.439794	1.60925	0.0558177	8.29237e-07	3.17134e-06	0.0208745	4.04653e-07	0.663043	0.195375	0.169197	4.753e-06	1.6971e-05	0.0610867
MSaapp	177	162.951	166.052	157.369	157.006	157.623	151.081	0.947705	***	1.00393	n.s.	0.962263	n.s.	3.72415	3.0002	4.22799	3.37813	4.80359	7.1387	0.0234258	0.0185195	0.0270644	0.0219002	0.0308562	0.0502041	10	10	34	14	20	4	2.05085	6.90764	5.88201	4.05374	7.2722	-0.439794	1.60925	0.0558177	8.29237e-07	3.17134e-06	0.0208745	4.04653e-07	0.663043	0.195375	0.169197	4.753e-06	1.6971e-05	0.0610867
MSapaa	178	169.157	173.499	164.391	164.552	164.272	155.267	0.947504	***	0.998295	n.s.	0.943572	n.s.	3.95223	3.18872	5.97977	3.85915	7.26483	7.08626	0.0239483	0.0188895	0.0366509	0.0238712	0.0448064	0.0484916	10	9	33	14	19	4	2.6461	6.04046	4.66774	4.92866	6.12202	0.143178	2.51624	0.017082	7.36019e-06	8.10882e-05	0.0106302	2.13631e-06	0.887153	0.0740124	0.0792665	2.91463e-05	0.000272127	0.0468697
MSapap	179	169.157	173.499	164.391	164.552	164.272	155.267	0.947504	***	0.998295	n.s.	0.943572	n.s.	3.95223	3.18872	5.97977	3.85915	7.26483	7.08626	0.0239483	0.0188895	0.0366509	0.0238712	0.0448064	0.0484916	10	9	33	14	19	4	2.6461	6.04046	4.66774	4.92866	6.12202	0.143178	2.51624	0.017082	7.36019e-06	8.10882e-05	0.0106302	2.13631e-06	0.887153	0.0740124	0.0792665	2.91463e-05	0.000272127	0.0468697
MSappa	180	170.349	174.846	164.661	164.834	164.533	157.678	0.941747	***	0.998176	n.s.	0.956586	n.s.	3.68722	3.71268	5.66881	4.18552	6.6661	7.23768	0.0221863	0.0218239	0.0346881	0.0258458	0.0410484	0.0487707	10	9	33	14	19	4	2.64492	6.00176	5.24205	4.48889	6.43481	0.15868	1.88926	0.0171608	9.51729e-06	1.9742e-05	0.0128453	3.23295e-06	0.874972	0.139903	0.0792665	3.62389e-05	7.97738e-05	0.0470186
MSappp	181	170.349	174.846	164.661	164.834	164.533	157.678	0.941747	***	0.998176	n.s.	0.956586	n.s.	3.68722	3.71268	5.66881	4.18552	6.6661	7.23768	0.0221863	0.0218239	0.0346881	0.0258458	0.0410484	0.0487707	10	9	33	14	19	4	2.64492	6.00176	5.24205	4.48889	6.43481	0.15868	1.88926	0.0171608	9.51729e-06	1.9742e-05	0.0128453	3.23295e-06	0.874972	0.139903	0.0792665	3.62389e-05	7.97738e-05	0.0470186
MSpaaa	182	164.604	165.752	157.956	157.459	158.304	151.134	0.952968	***	1.00537	n.s.	0.95983	n.s.	4.03341	2.48403	4.86815	4.25603	5.33458	8.72133	0.0251163	0.0153611	0.0310462	0.0275122	0.0341195	0.0613126	10	10	34	14	20	4	0.766243	5.99918	5.21447	3.29915	6.80059	-0.512857	1.40353	0.455446	5.53486e-06	1.55044e-05	0.0417141	1.45336e-07	0.611645	0.244463	0.679158	2.28313e-05	6.53163e-05	0.0975005
MSpaap	183	164.604	165.752	157.956	157.459	158.304	151.134	0.952968	***	1.00537	n.s.	0.95983	n.s.	4.03341	2.48403	4.86815	4.25603	5.33458	8.72133	0.0251163	0.0153611	0.0310462	0.0275122	0.0341195	0.0613126	10	10	34	14	20	4	0.766243	5.99918	5.21447	3.29915	6.80059	-0.512857	1.40353	0.455446	5.53486e-06	1.55044e-05	0.0417141	1.45336e-07	0.611645	0.244463	0.679158	2.28313e-05	6.53163e-05	0.0975005
MSpapa	184	163.197	164.958	157.368	156.508	157.97	149.267	0.95399	***	1.00934	n.s.	0.953731	n.s.	3.47106	2.66088	4.42524	3.69907	4.87071	7.59977	0.0218009	0.0165339	0.0283271	0.024057	0.0312185	0.0540961	10	10	34	14	20	4	1.27316	6.50855	5.07714	4.03166	6.69793	-0.993855	1.8443	0.220235	1.5153e-06	2.32198e-05	0.0229098	5.02275e-07	0.327813	0.151026	0.423026	7.14354e-06	9.01474e-05	0.0610867
MSpapp	185	163.197	164.958	157.368	156.508	157.97	149.267	0.95399	***	1.00934	n.s.	0.953731	n.s.	3.47106	2.66088	4.42524	3.69907	4.87071	7.59977	0.0218009	0.0165339	0.0283271	0.024057	0.0312185	0.0540961	10	10	34	14	20	4	1.27316	6.50855	5.07714	4.03166	6.69793	-0.993855	1.8443	0.220235	1.5153e-06	2.32198e-05	0.0229098	5.02275e-07	0.327813	0.151026	0.423026	7.14354e-06	9.01474e-05	0.0610867
MSppaa	186	170.129	170.765	163.621	161.948	164.854	157.678	0.958164	***	1.01794	n.s.	0.973631	n.s.	3.63173	2.69514	5.09406	4.8895	5.0085	7.23768	0.0218806	0.0161773	0.0313692	0.0307309	0.0307813	0.0487707	10	10	33	14	19	4	0.444569	5.65154	4.13213	3.52019	5.80863	-1.66987	1.10989	0.662371	1.32399e-05	0.000312773	0.0328009	2.57815e-06	0.105877	0.332007	0.778401	4.59914e-05	0.000983002	0.080549
MSppap	187	170.129	170.765	163.621	161.948	164.854	157.678	0.958164	***	1.01794	n.s.	0.973631	n.s.	3.63173	2.69514	5.09406	4.8895	5.0085	7.23768	0.0218806	0.0161773	0.0313692	0.0307309	0.0307813	0.0487707	10	10	33	14	19	4	0.444569	5.65154	4.13213	3.52019	5.80863	-1.66987	1.10989	0.662371	1.32399e-05	0.000312773	0.0328009	2.57815e-06	0.105877	0.332007	0.778401	4.59914e-05	0.000983002	0.080549
MSpppa	188	170.333	172.682	164.151	161.897	165.693	158.284	0.950597	***	1.02344	n.s.	0.977681	n.s.	3.78037	2.05846	5.09031	4.59505	4.93674	7.33276	0.0227488	0.0122185	0.0312523	0.0289284	0.0301866	0.0492221	10	10	32	13	19	4	1.72529	7.53611	5.35032	3.86655	7.68141	-2.22611	0.930905	0.106618	6.81028e-07	1.31284e-05	0.0273852	3.56359e-09	0.0344972	0.407787	0.235044	4.49479e-06	5.77651e-05	0.0708363
MSpppp	189	170.333	172.682	164.151	161.897	165.693	158.284	0.950597	***	1.02344	n.s.	0.977681	n.s.	3.78037	2.05846	5.09031	4.59505	4.93674	7.33276	0.0227488	0.0122185	0.0312523	0.0289284	0.0301866	0.0492221	10	10	32	13	19	4	1.72529	7.53611	5.35032	3.86655	7.68141	-2.22611	0.930905	0.106618	6.81028e-07	1.31284e-05	0.0273852	3.56359e-09	0.0344972	0.407787	0.235044	4.49479e-06	5.77651e-05	0.0708363
Eala	190	177.804	177.975	156.095	157.461	155.14	138.798	0.877064	***	0.98526	n.s.	0.881478	n.s.	4.34459	5.48693	10.5081	4.84594	13.1673	18.3665	0.0250456	0.0316862	0.0678132	0.0313251	0.085935	0.140595	10	9	34	14	20	4	0.074948	9.15368	6.58809	4.18395	8.52126	0.721551	2.01232	0.94123	1.13241e-07	4.59814e-07	0.021353	6.63478e-09	0.477095	0.134142	0.961045	1.01917e-06	3.79347e-06	0.0610867
Ealp	191	177.804	177.975	156.095	157.461	155.14	138.798	0.877064	***	0.98526	n.s.	0.881478	n.s.	4.34459	5.48693	10.5081	4.84594	13.1673	18.3665	0.0250456	0.0316862	0.0678132	0.0313251	0.085935	0.140595	10	9	34	14	20	4	0.074948	9.15368	6.58809	4.18395	8.52126	0.721551	2.01232	0.94123	1.13241e-07	4.59814e-07	0.021353	6.63478e-09	0.477095	0.134142	0.961045	1.01917e-06	3.79347e-06	0.0610867
Eara	192	178.749	178.001	156.126	157.224	155.357	141.411	0.877105	***	0.988124	n.s.	0.899422	n.s.	4.36645	4.417	10.3087	5.233	12.819	17.442	0.0250385	0.0255037	0.0665138	0.0338781	0.0835445	0.131051	10	9	34	14	20	4	-0.370613	10.2315	7.0271	4.13715	9.50809	0.585419	1.79038	0.715572	3.12054e-09	1.82209e-07	0.0229862	8.38937e-11	0.563146	0.166769	0.788819	6.17867e-08	1.63988e-06	0.0610867
Earp	193	178.749	178.001	156.126	157.224	155.357	141.411	0.877105	***	0.988124	n.s.	0.899422	n.s.	4.36645	4.417	10.3087	5.233	12.819	17.442	0.0250385	0.0255037	0.0665138	0.0338781	0.0835445	0.131051	10	9	34	14	20	4	-0.370613	10.2315	7.0271	4.13715	9.50809	0.585419	1.79038	0.715572	3.12054e-09	1.82209e-07	0.0229862	8.38937e-11	0.563146	0.166769	0.788819	6.17867e-08	1.63988e-06	0.0610867
Epla	194	185.099	183.379	159.446	161.229	158.197	143.557	0.869489	***	0.981196	n.s.	0.89039	n.s.	5.88585	7.01267	11.2396	6.64675	13.6089	17.3931	0.0326817	0.0393037	0.0710101	0.0419617	0.0871	0.128731	9	9	34	14	20	4	-0.563677	7.54423	6.5624	4.42207	7.89917	0.860433	1.99099	0.581022	9.63387e-07	5.54976e-07	0.0160169	1.27642e-07	0.396561	0.133358	0.738678	4.76876e-06	4.22635e-06	0.056496
Eplp	195	185.099	183.379	159.446	161.229	158.197	143.557	0.869489	***	0.981196	n.s.	0.89039	n.s.	5.88585	7.01267	11.2396	6.64675	13.6089	17.3931	0.0326817	0.0393037	0.0710101	0.0419617	0.0871	0.128731	9	9	34	14	20	4	-0.563677	7.54423	6.5624	4.42207	7.89917	0.860433	1.99099	0.581022	9.63387e-07	5.54976e-07	0.0160169	1.27642e-07	0.396561	0.133358	0.738678	4.76876e-06	4.22635e-06	0.056496
Epra	196	185.996	183.409	159.628	160.649	158.914	143.133	0.87034	***	0.989204	n.s.	0.890971	n.s.	5.27764	7.16173	10.615	6.45807	12.8788	15.5587	0.0292617	0.0401325	0.0669872	0.0409178	0.0820557	0.115495	8	9	34	14	20	4	-0.85377	7.72634	6.5484	4.94949	7.92122	0.516595	2.19807	0.407067	9.12193e-07	6.68714e-07	0.0102975	2.34024e-07	0.609286	0.107199	0.626753	4.753e-06	4.41351e-06	0.0468697
Eprp	197	185.996	183.409	159.628	160.649	158.914	143.133	0.87034	***	0.989204	n.s.	0.890971	n.s.	5.27764	7.16173	10.615	6.45807	12.8788	15.5587	0.0292617	0.0401325	0.0669872	0.0409178	0.0820557	0.115495	8	9	34	14	20	4	-0.85377	7.72634	6.5484	4.94949	7.92122	0.516595	2.19807	0.407067	9.12193e-07	6.68714e-07	0.0102975	2.34024e-07	0.609286	0.107199	0.626753	4.753e-06	4.41351e-06	0.0468697
Z2	198	182.985	158.524	117.999	122.585	115.008	92.1825	0.744362	***	0.938193	n.s.	0.751989	*	6.85505	20.2165	14.2522	14.8409	13.3329	10.0741	0.0383989	0.130428	0.121577	0.123084	0.11719	0.114748	10	11	38	15	23	5	-3.78102	4.99158	6.49528	8.75244	6.21617	1.60041	5.14035	0.00245441	0.000102341	1.2701e-05	5.59739e-07	3.12429e-05	0.12084	0.000393976	0.0183137	0.000321643	5.77651e-05	3.42208e-05
Z3	199	182.985	158.524	117.999	122.585	115.008	92.1825	0.744362	***	0.938193	n.s.	0.751989	*	6.85505	20.2165	14.2522	14.8409	13.3329	10.0741	0.0383989	0.130428	0.121577	0.123084	0.11719	0.114748	10	11	38	15	23	5	-3.78102	4.99158	6.49528	8.75244	6.21617	1.60041	5.14035	0.00245441	0.000102341	1.2701e-05	5.59739e-07	3.12429e-05	0.12084	0.000393976	0.0183137	0.000321643	5.77651e-05	3.42208e-05
Daa	200	184.83	181.109	168.556	170.871	166.936	147.118	0.930691	***	0.976974	n.s.	0.860987	n.s.	4.43025	4.80169	7.12027	6.93227	6.96164	13.6185	0.0247184	0.0273413	0.0425533	0.0412947	0.0422237	0.0983547	8	8	34	14	20	4	-1.6109	4.07421	6.1531	4.84364	6.00248	1.6259	3.36599	0.129653	0.000643649	6.77827e-06	0.0126883	2.25757e-05	0.11509	0.0351796	0.279473	0.00190213	3.44127e-05	0.0470186
Dap	201	184.83	181.109	168.556	170.871	166.936	147.118	0.930691	***	0.976974	n.s.	0.860987	n.s.	4.43025	4.80169	7.12027	6.93227	6.96164	13.6185	0.0247184	0.0273413	0.0425533	0.0412947	0.0422237	0.0983547	8	8	34	14	20	4	-1.6109	4.07421	6.1531	4.84364	6.00248	1.6259	3.36599	0.129653	0.000643649	6.77827e-06	0.0126883	2.25757e-05	0.11509	0.0351796	0.279473	0.00190213	3.44127e-05	0.0470186
Dpa	202	185.727	181.797	167.898	169.325	166.899	146.073	0.923546	***	0.985677	n.s.	0.86268	n.s.	5.78638	3.94086	7.51921	6.00589	8.42431	13.3734	0.0321289	0.0223546	0.0451137	0.036103	0.0511063	0.0972751	8	8	34	14	20	4	-1.58755	5.86804	6.3584	5.23023	7.32126	0.979983	3.38124	0.137659	1.08148e-05	1.15738e-06	0.0109829	3.42897e-07	0.334452	0.0363813	0.293471	3.89332e-05	7.39229e-06	0.0470186
[truncated: 7 more columns]

## Sheet: Time of Division
	Order	WT.mean	C.mean	EQ.mean	EA.mean	ED.mean	INV.mean		EQ.over.C	EQ.C.sign	ED.over.EA	ED.EA.sign	INV.over.EA	INV.EA.sign	WT.sd	C.sd	EQ.sd	EA.sd	ED.sd	INV.sd		WT.vc	C.vc	EQ.vc	EA.vc	ED.vc	INV.vc		WT.n	C.n	EQ.n	EA.n	ED.n	INV.n		C.vs.WT.t.stat	C.vs.EA.t.stat	C.vs.ED.t.stat	C.vs.INV.t.stat	C.vs.EQ.t.stat	EA.vs.ED.t.stat	EA.vs.INV.t.stat		C.vs.WT.p.val	C.vs.EA.p.val	C.vs.ED.p.val	C.vs.INV.p.val	C.vs.EQ.p.val	EA.vs.ED.p.val
AB	1
P1	2
ABa	3		0	3.41607e-17	0	7.40149e-17																								7	13	7	6
ABp	4		0.3575	-0.0144615	0.272571	-0.349333																								7	13	7	6
EMS	5		6.83429	3.52431	3.42371	3.64167			0.51568	***	1.06366	n.s.				1.05373	1.38245	1.59117	1.23204				0.15969	0.399806	0.481349	0.352414				7	13	7	6				4.72819	4.97628		5.98719	-0.277996				0.000721576	0.000561603		2.12065e-05	0.786209
P2	6		11.3539	7.93392	8.24143	7.57517			0.698782	**	0.919157	n.s.				1.70066	1.56006	1.43047	1.76033				0.155135	0.200413	0.17977	0.242064				7	13	7	6				3.70562	3.91916		4.41377	0.740848				0.00315015	0.00258547		0.000936578	0.476376
ABal	7	26.3865	26.1338	26.1633	26.1855	26.1474	24.8279		1.00113	n.s.	0.998543	n.s.	0.948153	n.s.	0.917165	1.15763	1.12837	1.11939	1.15497	0.940314		0.0356279	0.0449114	0.0433528	0.0432828	0.044566	0.039226		10	18	48	20	28	7		-0.63451	-0.139537	-0.038704	2.9147	-0.0925731	0.114852	3.12317		0.532118	0.889819	0.969338	0.0116679	0.92686	0.909112
ABar	8	26.3865	26.0226	25.8248	25.7494	25.8786	25.1386		0.992398	n.s.	1.00502	n.s.	0.976276	n.s.	0.917165	1.05671	1.19733	1.12015	1.26702	0.951537		0.0356279	0.0411714	0.0466051	0.0440458	0.0493974	0.0392035		10	18	48	20	28	7		-0.951837	0.77332	0.4168	2.02079	0.652538	-0.372734	1.39383		0.351959	0.444394	0.679002	0.0659053	0.518388	0.711143
ABpl	9	26.3865	26.6258	25.7813	25.8557	25.7282	25.1021		0.968285	*	0.99507	n.s.	0.970855	n.s.	0.917165	1.14817	1.23213	0.974371	1.40271	1.22286		0.0356279	0.0437214	0.0480405	0.038156	0.0550069	0.0504553		10	18	48	20	28	7		0.603196	2.21649	2.36928	2.84473	2.60764	0.371482	1.47474		0.552418	0.033542	0.0225749	0.0168004	0.0136374	0.711985
ABpr	10	26.6232	26.5189	25.9306	26.104	25.8068	24.8279		0.977816	n.s.	0.988615	n.s.	0.951115	n.s.	1.10486	1.20571	1.31912	1.00094	1.5119	0.940314		0.0425373	0.0460974	0.0511362	0.0388236	0.0591085	0.039226		10	18	48	20	28	7		-0.231722	1.14706	1.76714	3.7161	1.71982	0.818851	3.03826		0.819088	0.259556	0.0844997	0.00227926	0.0947582	0.417112
MS	11	38.5898	36.5169	31.9099	31.7981	31.9898	28.7579		0.87384	***	1.00603	n.s.	0.90439	n.s.	1.03132	1.67586	2.01122	2.03482	2.02775	2.08928		0.0273933	0.0465677	0.0633564	0.0647918	0.0639533	0.0752455		10	17	48	20	28	7		-3.9777	7.73439	8.10409	8.73627	9.22359	-0.322272	3.33585		0.000527998	4.4429e-09	7.0337e-10	8.44716e-06	1.01526e-10	0.748884
E	12	41.003	38.1138	32.8664	32.6043	33.0536	30.04		0.862324	***	1.01378	n.s.	0.921352	n.s.	1.44784	1.12174	2.28582	1.94753	2.51774	2.45872		0.0361935	0.0298643	0.0699109	0.0604789	0.0768513	0.0847715		10	17	48	20	28	7		-5.42496	10.7297	9.23219	8.33794	12.2707	-0.696658	2.4986		6.41581e-05	5.58189e-12	1.71908e-11	6.70124e-05	1.53931e-17	0.489549
C	13	47.4868	43.9874	39.3157	39.7431	39.0104	35.5339		0.893795	***	0.981562	n.s.	0.894089	n.s.	1.15629	1.33665	2.14497	2.03681	2.204	2.97609		0.0249584	0.0308339	0.0548419	0.05189	0.0570021	0.0867448		10	17	48	20	28	7		-7.16111	7.59195	9.42953	7.22119	10.4215	1.18729	3.46848		4.26054e-07	9.68493e-09	4.98255e-12	0.000171861	1.20133e-13	0.241641
P3	14	59.2797	53.5083	46.9728	47.4615	46.6412	40.3532		0.877859	***	0.982717	n.s.	0.850231	n.s.	2.3804	2.47543	3.12422	3.04688	3.18721	5.0766		0.0411593	0.0469854	0.0668649	0.0650416	0.0689448	0.130297		10	16	47	19	28	7		-5.92253	6.47701	7.95189	6.52502	8.5038	0.888983	3.4808		8.8756e-06	2.39629e-07	1.32858e-09	0.000275799	8.86855e-10	0.379332
ABala	15	58.2657	58.0407	58.6521	58.7005	58.6137	57.5646		1.01053	n.s.	0.998522	n.s.	0.980649	n.s.	1.13594	1.5745	1.48396	1.33356	1.62051	0.695813		0.0199832	0.0275797	0.0254482	0.0230169	0.0279353	0.0125912		10	15	43	19	24	6		-0.414777	-1.29673	-1.09328	0.960082	-1.31392	0.192578	2.72087		0.682184	0.205503	0.282825	0.349332	0.201678	0.848242
ABalp	16	58.2657	57.0931	56.9813	56.9877	56.9762	55.9704		0.998041	n.s.	0.999798	n.s.	0.982149	n.s.	1.13594	1.29128	1.27672	1.18217	1.37214	1.77661		0.0199832	0.0229705	0.0225362	0.0210172	0.0243336	0.0330645		10	16	43	19	24	6		-2.42801	0.250083	0.273609	1.41418	0.296714	0.0294882	1.31371		0.0241927	0.804182	0.786058	0.199717	0.768986	0.976619
ABara	17	57.7848	57.5421	57.9292	57.8998	57.9525	57.5375		1.00673	n.s.	1.00091	n.s.	0.993743	n.s.	1.27354	1.2783	1.09343	1.00807	1.17758	1.24705		0.0225904	0.0225622	0.018985	0.0176397	0.0205313	0.0225768		10	16	43	19	24	6		-0.472045	-0.90677	-1.02639	0.00759029	-1.074	-0.158103	0.647856		0.642186	0.372172	0.312799	0.994105	0.293659	0.875158
ABarp	18	57.548	56.6846	56.6518	56.7336	56.5871	56.7163		0.999422	n.s.	0.997418	n.s.	0.999695	n.s.	1.20184	1.15853	1.13773	1.31433	1.00095	1.58486		0.0214062	0.0207576	0.0201995	0.0234715	0.017873	0.0291079		10	16	43	19	24	6		-1.80697	-0.117237	0.274958	-0.0447006	0.0969627	0.402147	0.0242761		0.0868811	0.907385	0.7853	0.965576	0.923486	0.690177
ABpla	19	57.3227	56.8363	56.3649	56.4449	56.3015	57.1475		0.991705	n.s.	0.997458	n.s.	1.01245	n.s.	1.20113	1.23512	1.19553	1.24988	1.17386	1.23895		0.0214777	0.0220708	0.0213339	0.0224346	0.0210668	0.0225832		10	16	43	19	24	6		-0.993664	0.928831	1.36853	-0.525067	1.31483	0.383991	-1.20833		0.332453	0.359905	0.180938	0.612218	0.199982	0.703149
ABplp	20	58.5063	57.6781	57.2981	57.4487	57.1789	56.6608		0.993412	n.s.	0.995303	n.s.	0.986286	n.s.	1.25582	1.56498	1.27528	1.24001	1.31641	1.69111		0.0220013	0.0275852	0.0223864	0.0218687	0.0232624	0.0310899		10	15	43	19	24	6		-1.46173	0.464243	1.02877	1.27166	0.847395	0.689481	1.0551		0.157908	0.646294	0.313058	0.236619	0.406391	0.49453
ABpra	21	57.5595	56.9898	56.859	56.8089	56.8986	56.4171		0.997706	n.s.	1.00158	n.s.	0.993102	n.s.	1.31861	1.10148	1.20802	1.28591	1.16921	0.771438		0.0234813	0.0196297	0.0213695	0.0229335	0.020763	0.0142436		10	16	43	19	24	6		-1.14018	0.448022	0.250124	1.36888	0.39468	-0.236275	0.908087		0.270337	0.657066	0.804013	0.194176	0.695934	0.814526
ABprp	22	58.741	58.0913	57.6613	57.8978	57.4741	57.1412		0.992599	n.s.	0.992682	n.s.	0.986933	n.s.	1.47512	1.25794	1.21108	0.767089	1.4612	0.830855		0.0257401	0.0219929	0.0211255	0.0134234	0.0256884	0.0151462		10	16	43	19	24	6		-1.15494	0.53683	1.42386	2.05382	1.17885	1.22342	1.9798		0.264146	0.596345	0.163236	0.0593415	0.249122	0.229076
MSa	23	74.547	72.4109	67.5534	67.1821	67.844	62.9821		0.932918	***	1.00985	n.s.	0.937483	n.s.	1.01938	1.51772	3.54134	2.9986	3.95637	2.20645		0.0140162	0.0213629	0.0527425	0.0452538	0.0589496	0.0364927		10	13	41	18	23	6		-4.02894	6.35611	4.93108	9.48304	6.98883	-0.609248	3.66829		0.000620537	9.09654e-07	2.59985e-05	2.36069e-05	8.41635e-09	0.545895
MSp	24	74.547	72.3781	67.3305	66.6638	67.8523	63.3229		0.930262	***	1.01783	n.s.	0.949885	n.s.	1.01938	1.01634	3.54967	2.56373	4.14512	3.01221		0.0140162	0.0143121	0.0530415	0.0389918	0.0617543	0.0495511		10	13	41	18	23	6		-5.065	8.56982	4.97813	7.17738	8.11611	-1.127	2.43829		6.3902e-05	1.0411e-08	3.42825e-05	0.000529505	8.56166e-11	0.266951
Ea	25	106.438	103.916	91.0198	91.2439	90.8735	83.07		0.875899	***	0.995941	n.s.	0.910417	n.s.	2.03086	2.80934	5.17591	4.25135	5.78772	7.49512		0.0195573	0.0275547	0.0572399	0.0473697	0.0643821	0.093986		10	13	38	15	23	6		-2.49765	9.41363	9.0792	6.60196	11.2583	0.227043	2.51443		0.0209056	1.33476e-09	1.49691e-10	0.00073625	8.0475e-14	0.821697
Ep	26	110.766	107.531	93.2401	93.6003	93.0052	85.8775		0.867102	***	0.993642	n.s.	0.917492	n.s.	2.72881	2.95914	5.83723	4.60085	6.60972	6.59687		0.0252518	0.0280482	0.0630162	0.0499735	0.0718408	0.0800179		10	13	38	15	23	6		-2.71651	9.64796	9.05537	7.69088	11.4043	0.327071	2.62365		0.0132018	9.30826e-10	1.92949e-10	0.000263396	2.34792e-14	0.74552
Ca	27	87.0427	83.5616	78.6689	78.9767	78.4682	74.1742		0.941448	***	0.993561	n.s.	0.939191	n.s.	1.28578	1.39417	3.36969	2.71996	3.77916	5.21482		0.0151412	0.0170052	0.0431156	0.0350141	0.0486852	0.0732345		10	13	38	15	23	6		-6.20406	5.71896	5.8027	4.33846	7.30719	0.481746	2.14228		4.40921e-06	1.03197e-05	2.25205e-06	0.00641753	2.79905e-09	0.632937
Cp	28	87.0427	84.4422	78.2738	79.0307	77.7802	73.7154		0.926951	***	0.984178	n.s.	0.932744	n.s.	1.28578	1.99632	3.20818	2.7684	3.4333	4.41073		0.0151412	0.0240959	0.0412562	0.0356132	0.0446209	0.0623276		10	13	38	15	23	6		-3.78572	5.98518	7.36113	5.694	8.1176	1.23605	2.74356		0.00112144	2.88217e-06	1.5851e-08	0.00129056	1.83197e-09	0.224852
D	29	118.279	109.716	95.8075	97.4344	94.7464	84.9446		0.873233	***	0.972412	n.s.	0.871813	*	3.5383	5.93207	5.97542	6.30375	5.63749	4.92274		0.0306628	0.0551073	0.0627793	0.0657756	0.0601475	0.0603671		10	13	38	15	23	6		-4.3038	5.30671	7.40308	9.53743	7.28344	1.33883	4.82956		0.000346776	1.53393e-05	1.21967e-07	7.05583e-07	3.62698e-07	0.191538
P4	30	182.985	158.524	117.999	122.585	115.008	92.1825		0.744362	***	0.938193	n.s.	0.751989	*	6.85505	20.2165	14.2522	14.8409	13.3329	10.0741		0.0383989	0.130428	0.121577	0.123084	0.11719	0.114748		10	11	38	15	23	5		-3.78102	4.99158	6.49528	8.75244	6.21617	1.60041	5.14035		0.00245441	0.000102341	1.2701e-05	5.59739e-07	3.12429e-05	0.12084
ABalaa	31	102.135	102.516	102.822	103.24	102.549	102.152		1.00298	n.s.	0.993301	n.s.	0.989459	n.s.	1.06681	1.88695	2.06523	1.48396	2.36104	1.5362		0.0107063	0.0187604	0.0202177	0.0146134	0.0232738	0.0157903		10	13	38	15	23	5		0.612884	-1.11651	-0.045344	0.421605	-0.491767	1.10862	1.38349		0.547019	0.275874	0.964135	0.683225	0.627623	0.274949
ABalap	32	101.399	101.182	102.008	102.064	101.972	100.757		1.00817	n.s.	0.99909	n.s.	0.987185	n.s.	1.29548	1.44918	2.25596	1.88524	2.5088	1.89939		0.0130954	0.0145979	0.0222609	0.0187789	0.0248703	0.0197938		10	13	38	15	23	5		-0.37861	-1.39795	-1.19688	0.452751	-1.52002	0.129996	1.33596		0.708879	0.174089	0.239643	0.666917	0.138081	0.897311
ABalpa	33	98.9995	98.5383	98.2596	98.2676	98.2545	95.939		0.997172	n.s.	0.999867	n.s.	0.976304	n.s.	1.27722	1.99823	1.83637	1.31758	2.13698	1.81267		0.0132238	0.0206687	0.0188119	0.0136316	0.0219858	0.0198387		10	13	38	15	23	5		-0.67252	0.416336	0.399127	2.64699	0.442886	0.0233466	2.64869		0.508784	0.681537	0.692999	0.0293033	0.662745	0.981503
ABalpp	34	99.9523	99.0697	97.9482	98.1589	97.8107	95.939		0.98868	n.s.	0.996453	n.s.	0.977385	n.s.	1.09366	1.98881	1.76177	1.57535	1.89494	1.81267		0.0112154	0.0204609	0.0181051	0.0163164	0.0195841	0.0198387		10	13	38	15	23	5		-1.35565	1.32889	1.8554	3.19287	1.80524	0.613963	2.44759		0.190856	0.197023	0.0758495	0.0127682	0.0870223	0.543355
ABaraa	35	99.242	99.6268	100.901	100.162	101.382	100.192		1.01279	.	1.01218	n.s.	1.0003	n.s.	1.12323	1.39436	2.08891	1.29202	2.37949	2.51741		0.011601	0.014265	0.0208388	0.0131143	0.0237256	0.026382		10	13	38	15	23	5		0.732912	-1.04795	-2.79046	-0.475183	-2.47721	-2.04083	-0.0259182		0.471742	0.304785	0.00857778	0.654779	0.0188071	0.0488413
ABarap	36	99.4825	99.489	100.058	99.4362	100.464	100.183		1.00572	n.s.	1.01033	n.s.	1.00751	n.s.	1.22458	1.10548	1.73773	1.13596	1.95497	1.0213		0.0126173	0.0113252	0.0174815	0.0116144	0.019671	0.010704		10	13	38	15	23	5		0.0132376	0.124451	-1.91051	-1.26151	-1.36612	-2.04565	-1.37576		0.989581	0.901929	0.0645328	0.24317	0.181092	0.0482225
ABarpa	37	100.905	99.7907	99.2869	99.3039	99.2759	100.164		0.994951	n.s.	0.999718	n.s.	1.00866	n.s.	1.45397	1.50794	1.9496	1.53653	2.21128	2.7845		0.0147696	0.0154016	0.0197652	0.0157309	0.0225162	0.0291894		10	13	38	15	23	5		-1.79274	0.844515	0.82708	-0.284153	0.960809	0.0460822	-0.658104		0.0882619	0.406215	0.414202	0.787835	0.345235	0.963501
ABarpp	38	102.127	100.998	99.9802	100.431	99.6859	99.6655		0.989921	n.s.	0.992576	n.s.	0.992374	n.s.	1.30628	1.48924	1.97744	1.72765	2.10893	2.05415		0.0131105	0.0150288	0.0199085	0.017489	0.0213857	0.021641		10	13	38	15	23	5		-1.93207	0.932139	2.1751	1.32305	1.94644	1.19026	0.750018		0.0672405	0.359841	0.0370955	0.236387	0.0618518	0.242187
ABplaa	39	98.0605	96.9865	98.554	98.5828	98.5352	98.7875		1.01616	*	0.999517	n.s.	1.00208	n.s.	1.27053	1.71381	1.77359	1.43436	1.99504	1.08996		0.0132805	0.0180104	0.0181145	0.0147923	0.0204671	0.0115851		10	13	38	15	23	5		-1.72557	-2.64914	-2.45172	-2.64522	-2.82108	0.0855698	-0.334325		0.0991197	0.0141739	0.0206301	0.021765	0.0100955	0.932288
ABplap	40	97.3407	97.1596	98.1015	97.9396	98.2071	98.828		1.00969	n.s.	1.00273	n.s.	1.00907	n.s.	1.15162	1.76475	2.06141	2.12333	2.0611	1.79355		0.0121266	0.0185127	0.0211513	0.0220413	0.0212154	0.0190556		10	13	38	15	23	5		-0.296907	-1.0613	-1.6082	-1.77555	-1.58897	-0.384045	-0.914403		0.769516	0.298328	0.118844	0.117877	0.125095	0.703707
ABplpa	41	99.4922	99.3168	98.9202	99.5736	98.4941	97.319		0.996006	n.s.	0.989159	n.s.	0.977358	n.s.	1.36249	1.39407	2.26812	2.27333	2.20958	1.85116		0.0140368	0.0143065	0.0230796	0.0232111	0.0226775	0.0199727		10	13	38	15	23	5		-0.302992	-0.365245	1.36795	2.18654	0.743183	1.44668	2.2216		0.765067	0.718181	0.180443	0.0726276	0.462414	0.158548
ABplpp	42	101.144	100.424	99.9645	100.213	99.8027	98.239		0.995423	n.s.	0.99591	n.s.	0.980306	n.s.	1.87797	1.63507	1.87966	2.11112	1.74258	2.28899		0.0190315	0.0165948	0.018927	0.0214176	0.01765	0.0244652		10	13	38	15	23	5		-0.963091	0.298348	1.06942	1.95166	0.841112	0.625701	1.70172		0.348282	0.767835	0.294554	0.101799	0.408681	0.536977
ABpraa	43	98.0258	97.5029	97.983	97.6481	98.2014	97.369		1.00492	n.s.	1.00567	n.s.	0.997142	n.s.	0.931418	1.32804	2.10968	1.61318	2.38809	2.25501		0.00973932	0.0138825	0.0216727	0.0167956	0.0245826	0.0243174		10	13	38	15	23	5		-1.10866	-0.261109	-1.12773	0.124703	-0.95483	-0.8523	0.255766		0.280187	0.79607	0.267331	0.905518	0.346493	0.399694
ABprap	44	97.3233	97.907	98.3136	97.9964	98.5206	98.7875		1.00415	n.s.	1.00535	n.s.	1.00807	n.s.	0.744767	1.96691	1.88907	1.42836	2.14242	1.08996		0.00784382	0.020476	0.0193411	0.0148186	0.0219823	0.0115851		10	13	38	15	23	5		0.982427	-0.135714	-0.870187	-1.20357	-0.649899	-0.904895	-1.2943		0.340386	0.893304	0.391899	0.249701	0.52311	0.371544
ABprpa	45	99.7	100.313	99.7865	100.54	99.2954	99.3285		0.994748	n.s.	0.987625	n.s.	0.987954	n.s.	1.39049	1.54052	1.99227	2.04849	1.83471	2.46189		0.0142954	0.0156524	0.0200966	0.0207145	0.0186781	0.0260246		10	13	38	15	23	5		1.00045	-0.332654	1.77504	0.833948	0.983469	1.90599	0.9915		0.328818	0.74211	0.086447	0.440555	0.334168	0.0670909
ABprpp	46	100.43	100.303	100.789	101.217	100.51	99.3285		1.00485	n.s.	0.993014	n.s.	0.981341	n.s.	1.1535	1.06137	1.60148	1.16749	1.79992	2.46189		0.0117728	0.0107852	0.0159939	0.0117268	0.0181025	0.0260246		10	13	38	15	23	5		-0.269877	-2.16961	-0.43407	0.855075	-1.23825	1.46888	1.6545		0.790224	0.0393892	0.666989	0.434907	0.224707	0.15055
MSaa	47	116.23	115.75	109.942	109.031	110.497	103.742		0.949825	***	1.01344	n.s.	0.951489	n.s.	1.78616	1.7221	5.84239	2.33316	7.19642	4.75898		0.0157517	0.0151638	0.0534996	0.0217811	0.0658357	0.0481669		10	13	37	14	23	5		-0.648518	8.55395	3.3359	5.5052	5.41421	-0.901963	2.38495		0.524357	9.98611e-09	0.00255061	0.00397743	2.01208e-06	0.374558
MSap	48	120.294	120.259	113.804	113.135	114.211	106.581		0.946323	***	1.00951	n.s.	0.942069	n.s.	2.17007	2.47856	6.8406	2.90578	8.43351	3.96492		0.0184907	0.0210065	0.0605147	0.0261428	0.0746439	0.0390611		10	13	37	14	23	5		-0.0360133	6.86907	3.2032	7.19244	4.89753	-0.55988	3.38574		0.971619	3.48351e-07	0.00337435	0.000655919	1.14744e-05	0.579785
MSpa	49	116.74	115.05	109.656	108.629	110.281	103.301		0.953112	***	1.01521	n.s.	0.950956	n.s.	1.16451	0.874154	5.86474	2.91386	7.08419	5.66281		0.0102247	0.00774413	0.0538446	0.0273031	0.0649359	0.0575595		10	13	37	14	23	5		-3.83136	7.87331	3.18606	4.61831	5.42613	-0.989556	2.01077		0.00144169	8.48335e-07	0.00408834	0.00947355	2.97621e-06	0.329867
MSpp	50	120.285	118.373	113.609	111.684	114.782	107.124		0.959762	**	1.02774	n.s.	0.959166	n.s.	2.21375	1.58204	7.24385	3.28314	8.7006	4.87038		0.0188644	0.0136219	0.0641918	0.0299217	0.0766253	0.0477384		10	13	37	14	23	5		-2.31439	6.81786	1.92394	5.06293	3.75302	-1.53708	1.94211		0.0345867	1.64041e-06	0.0660564	0.0057961	0.000508287	0.134532
Caa	51	138.785	136.093	127.805	129.996	126.472	121.023		0.939101	***	0.972894	n.s.	0.93098	n.s.	3.28023	3.19268	5.32426	3.57724	5.82356	7.66571		0.0242263	0.0239926	0.0419406	0.0280095	0.0465467	0.0665077		10	11	37	14	23	5		-1.90187	4.49431	6.20897	4.23215	6.37005	2.27998	2.52099		0.0727097	0.00017088	6.5844e-07	0.00967714	6.75049e-07	0.0288167
Cap	52	148.587	143.926	136.378	138.234	135.196	126.373		0.947556	**	0.978022	n.s.	0.91419	n.s.	3.13858	5.12471	6.06204	4.81105	6.56949	10.6904		0.021651	0.0364158	0.0447591	0.035425	0.0491444	0.0888241		10	11	36	14	22	5		-2.53786	2.83127	4.18584	3.49363	4.08849	1.59791	2.39598		0.0213796	0.0100242	0.000304731	0.0182414	0.000605132	0.119536
Cpa	53	136.371	133.413	126.304	127.975	125.286	120.683		0.946712	***	0.978988	n.s.	0.943014	n.s.	2.52683	3.67288	4.88729	4.28072	5.03955	9.41884		0.0189922	0.0281037	0.0389562	0.0340469	0.0406615	0.0819487		10	12	37	14	23	5		-2.22834	3.48614	5.44406	2.93086	5.34411	1.73101	1.6708		0.0378716	0.00190669	7.26464e-06	0.0368736	1.57971e-05	0.0933602
Cpp	54	144.056	142.808	135.039	137.286	133.609	127.283		0.945596	**	0.973211	n.s.	0.927135	n.s.	2.78527	4.89619	5.49714	4.99717	5.42172	9.66851		0.019818	0.0350642	0.0409905	0.0370496	0.0410403	0.0797588		10	11	36	14	22	5		-0.725854	2.77377	4.90653	3.39798	4.47168	2.08215	2.21047		0.478337	0.0111266	6.55284e-05	0.0195371	0.000280509	0.0461003
ABalaaa	55	150.053	153.224	154.49	155.315	153.94	153.751		1.00826	n.s.	0.99115	n.s.	0.989935	n.s.	2.4203	3.95388	2.89391	2.50075	3.06243	1.64813		0.0165329	0.026391	0.0188658	0.0163887	0.0201305	0.0113894		10	11	35	14	21	4		2.23881	-1.52948	-0.523716	-0.363687	-0.982148	1.45439	1.47337		0.0390254	0.145609	0.607457	0.722216	0.343254	0.155725
ABalaap	56	150.537	154.166	154.726	155.501	154.21	153.116		1.00364	n.s.	0.991693	n.s.	0.984662	n.s.	2.05873	3.78371	4.05894	3.73495	4.27074	2.57242		0.0140178	0.025101	0.0264204	0.0244477	0.0280241	0.0178505		10	11	35	14	21	4		2.76237	-0.881117	-0.0298263	0.610399	-0.421134	0.94589	1.46495		0.0140467	0.388005	0.976466	0.558377	0.678683	0.351642
ABalapa	57	147.149	150.948	151.597	151.8	151.461	150.364		1.0043	n.s.	0.997764	n.s.	0.990536	n.s.	2.78403	3.03785	3.70971	2.55037	4.37254	4.95075		0.0193928	0.0205826	0.0246457	0.0171008	0.0292128	0.034983		10	11	35	14	21	4		2.99068	-0.746609	-0.387805	0.221357	-0.584426	0.289523	0.559562		0.00751623	0.464192	0.70116	0.836039	0.565385	0.774016
ABalapp	58	148.139	151.113	152.199	152.075	152.282	150.282		1.00719	n.s.	1.00136	n.s.	0.988209	n.s.	2.83258	2.57105	3.54322	2.35737	4.20859	3.20812		0.0195991	0.0174008	0.0234464	0.0157782	0.0279658	0.0226815		10	11	35	14	21	4		2.51018	-0.963168	-0.973099	0.466414	-1.10917	-0.186173	1.04046		0.0216685	0.34661	0.338523	0.662655	0.278779	0.853475
ABalpaa	59	144.976	145.723	146.442	147.25	145.903	143.676		1.00494	n.s.	0.990853	n.s.	0.975727	n.s.	3.48813	3.56588	3.45662	3.02917	3.6859	3.53022		0.0246616	0.0250264	0.0237727	0.020939	0.0255634	0.0261065		10	11	35	14	21	4		0.484662	-1.13481	-0.134413	0.990392	-0.587757	1.18018	1.84057		0.63349	0.270083	0.894354	0.364147	0.564721	0.246785
ABalpap	60	144.266	145.056	144.523	144.394	144.608	142.988		0.996321	n.s.	1.00148	n.s.	0.990256	n.s.	3.46135	3.0361	2.79069	1.76931	3.34448	2.30448		0.0245927	0.0214062	0.0194476	0.0124721	0.0234033	0.017124		10	11	35	14	21	4		0.554008	0.642357	0.382917	1.40578	0.518267	-0.245563	1.12961		0.586373	0.530202	0.705414	0.201837	0.611503	0.807603
ABalppa	61	148.365	148.122	147.904	148.586	147.45	144.854		0.998534	n.s.	0.992355	n.s.	0.974886	n.s.	3.14437	3.95267	3.01112	2.66894	3.20025	3.11732		0.0217233	0.0272918	0.0205039	0.018283	0.0219623	0.0228654		10	11	35	14	21	4		-0.156854	-0.334397	0.486096	1.66516	0.167518	1.1379	2.17699		0.877041	0.742221	0.633091	0.140875	0.869385	0.26382
ABalppp	62	145.008	145.472	144.501	145.011	144.161	141.891		0.993324	n.s.	0.994139	n.s.	0.978481	n.s.	2.113	3.31255	3.1485	3.03384	3.25054	4.41502		0.0149358	0.0232885	0.0219444	0.021295	0.0228164	0.0330604		10	11	35	14	21	4		0.385977	0.358511	1.07032	1.47824	0.858159	0.788974	1.3269		0.704263	0.723603	0.297172	0.208575	0.403398	0.436456
ABaraaa	63	146.454	148.865	151.211	150.95	151.386	152.009		1.01576	n.s.	1.00289	n.s.	1.00702	n.s.	3.19373	2.6964	3.92768	3.16756	4.4299	4.2212		0.0223523	0.0185246	0.0261603	0.0213589	0.0296107	0.0295049		10	11	35	14	21	4		1.86014	-1.7761	-1.99523	-1.39003	-2.23505	-0.338946	-0.465807		0.0795284	0.0890587	0.0554428	0.238066	0.034753	0.736812
ABaraap	64	144.516	145.47	149.479	149.635	149.375	148.964		1.02756	***	0.998264	n.s.	0.995517	n.s.	3.28798	1.78472	3.24531	2.09816	3.87487	4.77114		0.0233205	0.0125475	0.0218659	0.0142723	0.0262494	0.0340307		10	11	35	14	21	4		0.814709	-5.35873	-3.89612	-1.42871	-5.21697	0.25601	0.273724		0.429286	1.97473e-05	0.0005135	0.240244	1.09778e-05	0.799584
ABarapa	65	146.459	147.255	149.234	148.453	149.755	150.099		1.01344	n.s.	1.00877	n.s.	1.01109	n.s.	2.89605	2.29527	3.49282	3.02275	3.75358	2.18379		0.0202681	0.0159414	0.0235721	0.0207252	0.0253632	0.0154583		10	11	35	14	21	4		0.692775	-1.12686	-2.33142	-2.20049	-2.17605	-1.13112	-1.2118		0.497713	0.27143	0.0268627	0.0730682	0.0388901	0.266492
ABarapp	66	146.679	149.973	151.018	150.542	151.336	152.019		1.00697	n.s.	1.00527	n.s.	1.00981	n.s.	3.26904	2.21379	2.81533	2.28301	3.13396	4.1646		0.0228442	0.0150968	0.0187755	0.0154361	0.0209552	0.0291075		10	11	35	14	21	4		2.67653	-0.629455	-1.42648	-0.935765	-1.27552	-0.866275	-0.680674		0.0168002	0.535557	0.165153	0.407268	0.215961	0.392657
ABarpaa	67	143.565	144.162	145.316	145.066	145.492	146.649		1.00801	n.s.	1.00293	n.s.	1.01091	n.s.	2.96849	2.7928	3.24573	3.2316	3.32767	4.42981		0.0211938	0.0198129	0.0224998	0.0226745	0.0231578	0.0320947		10	11	34	14	20	4		0.473467	-0.74941	-1.18298	-1.04958	-1.14342	-0.373124	-0.665908		0.641413	0.461292	0.2484	0.354468	0.266694	0.711802
ABarpap	68	145.982	146.539	147.326	147.125	147.461	147.809		1.00537	n.s.	1.00228	n.s.	1.00465	n.s.	2.19064	3.52007	3.4413	2.96716	3.78975	2.54043		0.0153814	0.0245673	0.0235252	0.0205278	0.026006	0.0182615		10	11	35	14	21	4		0.439227	-0.441979	-0.685043	-0.766989	-0.650473	-0.293389	-0.456781		0.666054	0.663346	0.500533	0.466399	0.524356	0.771117
ABarppa	69	146.452	146.212	147.246	147.517	147.066	148.434		1.00707	n.s.	0.996945	n.s.	1.00622	n.s.	2.3385	2.07892	3.10948	3.12041	3.16587	3.45332		0.0163669	0.0145417	0.0212684	0.0215307	0.0217831	0.024719		10	11	35	14	21	4		-0.247127	-1.25047	-0.915324	-1.20974	-1.26419	0.416204	-0.47855		0.807584	0.223976	0.367776	0.29583	0.217674	0.6804
ABarppp	70	147.406	146.916	147.491	148.025	147.135	147.092		1.00392	n.s.	0.993985	n.s.	0.993694	n.s.	3.2113	2.83007	3.22077	3.02477	3.36969	1.08749		0.0223299	0.019701	0.021993	0.0207991	0.0231746	0.00785534		10	11	35	14	21	4		-0.37007	-0.944068	-0.194744	-0.17418	-0.56857	0.814712	0.958111		0.715629	0.355283	0.847246	0.864457	0.57635	0.421649
ABplaaa	71	144.323	146.078	149.344	148.995	149.576	152.077		1.02236	*	1.0039	n.s.	1.02069	n.s.	2.84001	2.87465	3.2542	3.02507	3.45146	4.15035		0.0201701	0.0201261	0.0219456	0.0206657	0.0233496	0.0289968		10	11	35	14	21	4		1.4055	-2.46117	-3.04673	-2.66758	-3.18147	-0.526064	-1.38385		0.176139	0.0221231	0.00555699	0.0545158	0.00496691	0.602655
ABplaap	72	141.664	142.622	145.153	145.733	144.767	145.48		1.01775	*	0.993372	n.s.	0.998263	n.s.	2.38987	2.25203	3.44992	3.42823	3.49315	3.99289		0.0172918	0.016149	0.0239371	0.0239441	0.0244167	0.0291617		10	11	35	14	21	4		0.943205	-2.72778	-2.10104	-1.35517	-2.82802	0.810477	0.115208		0.357713	0.0121637	0.044609	0.251814	0.00889246	0.42441
ABplapa	73	141.71	145.208	146.165	145.26	146.768	146.673		1.00659	n.s.	1.01038	n.s.	1.00973	n.s.	2.29547	2.11579	3.13723	3.09675	3.08917	3.78406		0.0166033	0.0149019	0.021617	0.0216994	0.0212985	0.0274117		10	11	35	14	21	4		3.61968	-0.0496351	-1.68094	-0.733802	-1.15339	-1.41294	-0.684365		0.0019039	0.960848	0.104061	0.506771	0.259627	0.168705
ABplapp	74	144.075	144.849	146.976	146.703	147.157	147.843		1.01468	n.s.	1.0031	n.s.	1.00777	n.s.	2.23879	2.88582	3.84572	3.05305	4.35854	3.17861		0.0159275	0.0203758	0.0263526	0.0211827	0.0299709	0.0228437		10	11	35	14	21	4		0.689451	-1.55463	-1.79083	-1.65233	-1.95824	-0.362341	-0.637789		0.499062	0.134209	0.0840967	0.160146	0.0628616	0.719416
ABplpaa	75	147.199	148.835	148.011	148.721	147.537	145.933		0.994458	n.s.	0.992041	n.s.	0.981252	n.s.	3.49575	2.73492	3.47547	3.21726	3.63561	3.01794		0.0243422	0.0187931	0.0236489	0.0220192	0.0249354	0.0219729		10	11	35	14	21	4		1.1867	0.0962047	1.13457	1.68812	0.81465	1.01173	1.60543		0.251619	0.924198	0.266926	0.153051	0.424362	0.319684
ABplpap	76	145.492	146.983	146.573	146.845	146.391	145.298		0.997206	n.s.	0.996913	n.s.	0.989464	n.s.	2.43915	2.62488	3.77036	3.57313	3.9726	3.55984		0.017184	0.0182642	0.0259072	0.0247672	0.0274599	0.0260316		10	11	35	14	21	4		1.34976	0.111825	0.504276	0.865483	0.404118	0.351416	0.76598		0.192967	0.911935	0.617993	0.432864	0.689677	0.727732
ABplppa	77	150.742	153.803	152.127	152.278	152.027	151.957		0.989109	n.s.	0.998358	n.s.	0.997894	n.s.	3.74138	3.49964	2.85862	2.93037	2.8782	4.40487		0.0254403	0.0232713	0.0189252	0.0195873	0.0191575	0.0307993		10	11	35	14	21	4		1.93073	1.16055	1.4456	0.755755	1.44336	0.249121	0.137164		0.0690013	0.259835	0.166204	0.487723	0.170251	0.805108
ABplppp	78	148.107	149.913	149.504	149.392	149.58	148.286		0.997277	n.s.	1.00126	n.s.	0.992595	n.s.	3.96462	3.01844	2.92876	2.84797	3.04877	4.47324		0.0274378	0.0205923	0.0197297	0.0194042	0.0206249	0.0320517		10	11	35	14	21	4		1.16544	0.43909	0.295543	0.673853	0.39409	-0.185744	0.468214		0.260134	0.665084	0.770537	0.536974	0.6986	0.853924
ABpraaa	79	145.959	147.906	148.732	148.426	148.936	149.123		1.00558	n.s.	1.00343	n.s.	1.00469	n.s.	2.27947	2.91748	3.61035	3.65567	3.65557	4.81047		0.0160076	0.0201735	0.0244477	0.0250694	0.0248369	0.0342746		10	11	35	14	21	4		1.71195	-0.395436	-0.867073	-0.47502	-0.771271	-0.404161	-0.268356		0.103517	0.696168	0.394208	0.660551	0.449327	0.689163
ABpraap	80	143.078	143.542	145.805	146.187	145.55	145.451		1.01577	n.s.	0.995646	n.s.	0.994967	n.s.	2.08677	2.6908	3.89808	4.32292	3.67619	3.61234		0.0149494	0.0191718	0.0269259	0.0300993	0.0255579	0.0263876		10	11	35	14	21	4		0.443227	-1.87369	-1.76049	-0.964374	-2.16546	0.452569	0.343137		0.662721	0.0743053	0.0898783	0.386123	0.0403345	0.654792
ABprapa	81	142.38	145.871	147.68	147.002	148.133	146.63		1.0124	n.s.	1.0077	n.s.	0.997472	n.s.	1.91592	2.7716	3.17356	2.86215	3.35546	2.80653		0.0137929	0.0194321	0.0216429	0.0198179	0.0229214	0.0203365		10	11	35	14	21	4		3.38309	-0.997496	-2.03537	-0.464412	-1.8216	-1.06844	0.232492		0.00335316	0.329402	0.0529358	0.660792	0.0843059	0.293602
ABprapp	82	144.312	147.459	147.962	147.196	148.473	147.78		1.00341	n.s.	1.00868	n.s.	1.00397	n.s.	1.63148	3.88225	3.01017	3.08842	2.9187	1.83235		0.0115879	0.0269261	0.0204895	0.0213564	0.0198921	0.0131741		10	11	35	14	21	4		2.46009	0.183623	-0.761139	-0.216164	-0.394388	-1.22513	-0.47384		0.0278461	0.856271	0.457583	0.832629	0.699242	0.231147
ABprpaa	83	147.389	149.287	149.568	150.036	149.256	146.765		1.00188	n.s.	0.994799	n.s.	0.978199	n.s.	1.79546	2.62103	3.0455	2.93605	3.14779	6.656		0.0124863	0.0179561	0.0205074	0.0199184	0.021341	0.0481859		10	11	35	14	21	4		1.95012	-0.672746	0.0297365	0.737203	-0.297945	0.748278	0.956598		0.067148	0.50794	0.976523	0.509331	0.768934	0.460246
ABprpap	84	145.961	149.188	147.73	149.008	146.878	146.077		0.99023	n.s.	0.985705	n.s.	0.980328	n.s.	1.91489	2.49472	3.18659	3.65964	2.57903	4.73854		0.0134472	0.0171021	0.0217244	0.0249986	0.017768	0.0344661		10	11	35	14	21	4		3.34118	0.145501	2.45851	1.25141	1.57548	1.88762	1.14358		0.00352587	0.885603	0.0227051	0.285472	0.129922	0.0726491
ABprppa	85	150.75	152.958	153.239	153.834	152.842	151.504		1.00184	n.s.	0.993553	n.s.	0.984859	n.s.	2.36485	2.85341	3.63065	3.45367	3.77393	5.01932		0.0160794	0.0190789	0.023862	0.0228516	0.0249857	0.0352005		10	11	35	14	21	4		1.93705	-0.694282	0.0971367	0.547757	-0.265909	0.801719	0.871074		0.067866	0.494485	0.923367	0.614966	0.792883	0.429083
ABprppp	86	147.406	149.667	150.357	150.525	150.245	147.953		1.00461	n.s.	0.99814	n.s.	0.982915	n.s.	2.63202	3.12192	2.85409	3.23634	2.64705	4.79558		0.0183019	0.0213332	0.0191177	0.0218843	0.017828	0.0344386		10	11	35	14	21	4		1.79923	-0.670889	-0.523026	0.665429	-0.651996	0.269206	1.00891		0.0879641	0.509284	0.607444	0.542463	0.523879	0.790065
Eal	87	177.804	177.975	155.987	157.197	155.14	138.798		0.876453	***	0.986915	n.s.	0.882959	n.s.	4.34459	5.48693	10.5265	5.02003	13.1673	18.3665		0.0250456	0.0316862	0.0679797	0.032505	0.085935	0.140595		10	9	34	14	20	4		0.074948	9.16027	6.58809	4.18395	8.55619	0.635718	1.98244		0.94123	8.87465e-08	4.59814e-07	0.021353	6.0315e-09	0.530502
Ear	88	178.749	178.001	156.234	157.488	155.357	141.411		0.877715	***	0.986468	n.s.	0.897914	n.s.	4.36645	4.417	10.2884	5.0647	12.819	17.442		0.0250385	0.0255037	0.0663363	0.0327335	0.0835445	0.131051		10	9	34	14	20	4		-0.370613	10.2566	7.0271	4.13715	9.47188	0.672296	1.82171		0.715572	3.64626e-09	1.82209e-07	0.0229862	9.36959e-11	0.507217
Epl	89	185.099	183.379	159.234	161.229	157.837	143.557		0.868332	***	0.978958	n.s.	0.89039	n.s.	5.88585	7.01267	11.2281	6.64675	13.5553	17.3931		0.0326817	0.0393037	0.0710317	0.0419617	0.0869555	0.128731		9	9	34	14	20	4		-0.563677	7.54423	6.67291	4.42207	7.97252	0.965647	1.99099		0.581022	9.63387e-07	4.22221e-07	0.0160169	1.11514e-07	0.342137
Epr	90	185.996	183.409	159.628	160.649	158.914	143.133		0.87034	***	0.989204	n.s.	0.890971	n.s.	5.27764	7.16173	10.615	6.45807	12.8788	15.5587		0.0292617	0.0401325	0.0669872	0.0409178	0.0820557	0.115495		8	9	34	14	20	4		-0.85377	7.72634	6.5484	4.94949	7.92122	0.516595	2.19807		0.407067	9.12193e-07	6.68714e-07	0.0102975	2.34024e-07	0.609286
Da	91	184.83	181.109	168.556	170.871	166.936	147.118		0.930691	***	0.976974	n.s.	0.860987	n.s.	4.43025	4.80169	7.12027	6.93227	6.96164	13.6185		0.0247184	0.0273413	0.0425533	0.0412947	0.0422237	0.0983547		8	8	34	14	20	4		-1.6109	4.07421	6.1531	4.84364	6.00248	1.6259	3.36599		0.129653	0.000643649	6.77827e-06	0.0126883	2.25757e-05	0.11509
Dp	92	185.727	181.797	167.898	169.325	166.899	146.073		0.923546	***	0.985677	n.s.	0.86268	n.s.	5.78638	3.94086	7.51921	6.00589	8.42431	13.3734		0.0321289	0.0223546	0.0451137	0.036103	0.0511063	0.0972751		8	8	34	14	20	4		-1.58755	5.86804	6.3584	5.23023	7.32126	0.979983	3.38124		0.137659	1.08148e-05	1.15738e-06	0.0109829	3.42897e-07	0.334452
MSaaa	93	162.72	165.424	157.171	157.108	157.214	150.446		0.950106	***	1.00068	n.s.	0.957595	n.s.	3.20963	2.64166	3.97871	2.6714	4.75465	6.78518		0.020218	0.0163682	0.0255007	0.0173072	0.0306211	0.0479193		10	10	34	14	20	4		2.0573	7.56794	6.07182	4.28702	7.65201	-0.0833168	1.92164		0.0550031	3.0167e-07	1.61431e-06	0.0183721	1.11742e-07	0.934138
MSaap	94	162.951	166.052	157.369	157.006	157.623	151.081		0.947705	***	1.00393	n.s.	0.962263	n.s.	3.72415	3.0002	4.22799	3.37813	4.80359	7.1387		0.0234258	0.0185195	0.0270644	0.0219002	0.0308562	0.0502041		10	10	34	14	20	4		2.05085	6.90764	5.88201	4.05374	7.2722	-0.439794	1.60925		0.0558177	8.29237e-07	3.17134e-06	0.0208745	4.04653e-07	0.663043
MSapa	95	169.157	173.499	164.391	164.552	164.272	155.267		0.947504	***	0.998295	n.s.	0.943572	n.s.	3.95223	3.18872	5.97977	3.85915	7.26483	7.08626		0.0239483	0.0188895	0.0366509	0.0238712	0.0448064	0.0484916		10	9	33	14	19	4		2.6461	6.04046	4.66774	4.92866	6.12202	0.143178	2.51624		0.017082	7.36019e-06	8.10882e-05	0.0106302	2.13631e-06	0.887153
MSapp	96	170.349	174.846	164.661	164.834	164.533	157.678		0.941747	***	0.998176	n.s.	0.956586	n.s.	3.68722	3.71268	5.66881	4.18552	6.6661	7.23768		0.0221863	0.0218239	0.0346881	0.0258458	0.0410484	0.0487707		10	9	33	14	19	4		2.64492	6.00176	5.24205	4.48889	6.43481	0.15868	1.88926		0.0171608	9.51729e-06	1.9742e-05	0.0128453	3.23295e-06	0.874972
MSpaa	97	164.604	165.752	157.956	157.459	158.304	151.134		0.952968	***	1.00537	n.s.	0.95983	n.s.	4.03341	2.48403	4.86815	4.25603	5.33458	8.72133		0.0251163	0.0153611	0.0310462	0.0275122	0.0341195	0.0613126		10	10	34	14	20	4		0.766243	5.99918	5.21447	3.29915	6.80059	-0.512857	1.40353		0.455446	5.53486e-06	1.55044e-05	0.0417141	1.45336e-07	0.611645
MSpap	98	163.197	164.958	157.368	156.508	157.97	149.267		0.95399	***	1.00934	n.s.	0.953731	n.s.	3.47106	2.66088	4.42524	3.69907	4.87071	7.59977		0.0218009	0.0165339	0.0283271	0.024057	0.0312185	0.0540961		10	10	34	14	20	4		1.27316	6.50855	5.07714	4.03166	6.69793	-0.993855	1.8443		0.220235	1.5153e-06	2.32198e-05	0.0229098	5.02275e-07	0.327813
MSppa	99	170.129	170.765	163.621	161.948	164.854	157.678		0.958164	***	1.01794	n.s.	0.973631	n.s.	3.63173	2.69514	5.09406	4.8895	5.0085	7.23768		0.0218806	0.0161773	0.0313692	0.0307309	0.0307813	0.0487707		10	10	33	14	19	4		0.444569	5.65154	4.13213	3.52019	5.80863	-1.66987	1.10989		0.662371	1.32399e-05	0.000312773	0.0328009	2.57815e-06	0.105877
MSppp	100	170.333	172.682	164.151	161.897	165.693	158.284		0.950597	***	1.02344	n.s.	0.977681	n.s.	3.78037	2.05846	5.09031	4.59505	4.93674	7.33276		0.0227488	0.0122185	0.0312523	0.0289284	0.0301866	0.0492221		10	10	32	13	19	4		1.72529	7.53611	5.35032	3.86655	7.68141	-2.22611	0.930905		0.106618	6.81028e-07	1.31284e-05	0.0273852	3.56359e-09	0.0344972
Caaa	101	197.284	193.51	181.923	185.251	179.964	178.113		0.94012	*	0.971462	n.s.	0.961464	n.s.	5.98818	6.11124	7.31152	5.90397	7.50092	7.52612		0.0314372	0.03316	0.0405624	0.0326668	0.042293	0.0448958		7	5	27	10	17	4		-1.06342	2.4952	4.12577	3.31071	3.76953	2.02808	1.6994		0.316363	0.0377752	0.00337175	0.0170597	0.00840796	0.0544482
Caap	102	217.171	210.523	196.676	200.415	194.663			0.934228	*	0.971298	n.s.			4.49105	5.64326	7.80387	6.33518	7.98825			0.0219723	0.0284813	0.0401748	0.0327392	0.0418255			4	4	20	7	13			-1.84375	2.73125	4.42084		4.17362	1.76331			0.11725	0.0290888	0.00291445		0.00679803	0.0980313
Capa	103				216.924	216.231					0.996804	n.s.						10.7382	8.43026						0.0519773	0.0402057						5	8								0.122677								0.905775
Capp	104	225.289	221.903	207.321	208.334	206.434			0.934285	.	0.990878	n.s.			3.43594	7.39957	8.72156	9.07808	8.92002			0.0162045	0.03543	0.0427691	0.0451308	0.0445604			4	4	15	7	8			-0.829974	2.68906	3.18197		3.3668	0.407769			0.450772	0.0289246	0.0146284		0.0173727	0.69025
Cpaa	105	193.089	189.143	179.766	181.352	178.894	183.408		0.950423	**	0.986447	n.s.	1.01134	n.s.	6.08645	4.98505	7.09582	6.08637	7.59921	22.8816		0.0325066	0.0271796	0.0397909	0.0343239	0.0430099	0.132555		8	8	31	11	20	4		-1.41846	3.06222	4.18644	0.495443	4.31138	0.982715	-0.177474		0.178766	0.00717179	0.000464819	0.652865	0.000595018	0.33521
Cpap	106	194.292	194.937	184.33	186.838	182.797	182.586		0.945589	**	0.978373	n.s.	0.977243	n.s.	4.68608	5.6688	6.40816	5.70365	6.47625	14.0557		0.0248725	0.0301188	0.0350643	0.031221	0.0359207	0.0817927		8	7	29	11	18	4		0.238253	2.94778	4.61446	1.68099	4.32776	1.75727	0.587665		0.815797	0.0113305	0.000536234	0.176637	0.00147178	0.0919414
Cppa	107	218.355	225.377	206.464	209.453	204.472			0.916085	**	0.976216	n.s.			5.27171	5.17587	8.10608	7.87156	8.06823			0.0256518	0.0244008	0.0399157	0.0391473	0.040555			4	4	15	6	9			1.90092	3.85927	5.6011		5.68224	1.18882			0.106051	0.00482719	0.000329869		0.000580423	0.259401
Cppp	108				216.009	214.153					0.991409	n.s.						8.70079	10.0629						0.0419581	0.0482946						6	9								0.379838								0.710728
ABalaaaa	109	213.792	216.208	219.324	217.618	220.786			1.01441	n.s.	1.01456	n.s.			4.8342	9.84884	7.49968	6.47785	8.49223			0.0240249	0.0483997	0.0348521	0.0310073	0.0398373			4	4	13	6	7			0.44024	-0.252403	-0.77894		-0.583014	-0.761714			0.680689	0.811299	0.467715		0.590218	0.462409
ABalaaap	110	205.708	209.062	210.037	208.803	211.271			1.00466	n.s.	1.01182	n.s.			3.53599	7.19737	5.58892	4.06327	6.90032			0.0182637	0.0361483	0.0270844	0.0201549	0.0338275			4	5	14	7	7			0.913329	0.0727189	-0.533171		-0.27469	-0.815468			0.396039	0.944461	0.60753		0.793035	0.434343
ABalaapa	111	214.336	216.169	214.94	215.066	214.846			0.994318	n.s.	0.99898	n.s.			4.2085	10.0149	8.18775	6.9588	9.48096			0.0208622	0.0492248	0.0387733	0.0337048	0.045508			4	4	14	6	8			0.337376	0.191571	0.21944		0.224766	0.0499312			0.752684	0.85571	0.833835		0.832629	0.960999
ABalaapp	112	207.407	211.764	210.254	209.539	210.881			0.992872	n.s.	1.0064	n.s.			2.30466	10.5709	6.43056	5.49602	7.47347			0.0118063	0.0530381	0.0310944	0.0271659	0.0365468			4	4	15	7	8			0.805398	0.391826	0.149462		0.272459	-0.399275			0.474812	0.7154	0.887565		0.800117	0.696335
ABalapaa	113	206.834	211.386	211.018	209.453	212.583			0.99826	n.s.	1.01494	n.s.			2.93558	7.90354	5.86918	3.27512	7.62853			0.01508	0.039726	0.0283103	0.016195	0.0371666			4	4	14	7	7			1.07963	0.466727	-0.244741		0.0864989	-0.997512			0.343823	0.667521	0.814594		0.93523	0.347245
ABalapap	114	202.508	207.316	206.095	205.48	206.633			0.994111	n.s.	1.00561	n.s.			3.62387	7.51947	6.57603	3.08011	8.81181			0.0187896	0.0380842	0.0324396	0.0155252	0.0439774			5	5	15	7	8			1.28777	0.515846	0.148994		0.3241	-0.346584			0.247115	0.628087	0.884604		0.756544	0.736966
ABalappa	115	210.867	213.782	213.215	213.426	213.004			0.997346	n.s.	0.998026	n.s.			3.49415	5.07634	6.24458	4.6237	7.93767			0.0176061	0.0252294	0.0298107	0.0224379	0.0385962			4	4	14	7	7			0.946224	0.115779	0.198011		0.186807	0.121357			0.38499	0.911693	0.847573		0.858069	0.905897
ABalappp	116	202.089	203.296	206.666	202.844	209.639			1.01658	n.s.	1.0335	n.s.			2.51025	5.75634	7.4178	2.63495	8.6737			0.0130426	0.0297308	0.0364535	0.013454	0.0425237			5	5	16	7	9			0.42974	0.163873	-1.63857		-1.06225	-2.22227			0.683798	0.876001	0.128602		0.317008	0.0509535
ABalpaaa	117	207.441	205.594	207.848	206.417	208.96			1.01096	n.s.	1.01232	n.s.			7.48006	4.34462	7.25164	5.00806	8.75245			0.0383123	0.0224528	0.0354343	0.0251283	0.0430492			4	4	16	7	9			-0.427155	-0.285772	-0.925548		-0.79661	-0.731277			0.687682	0.783092	0.375229		0.449037	0.477521
ABalpaap	118	196.901	196.271	197.358	196.646	197.927			1.00553	n.s.	1.00651	n.s.			5.93606	7.24536	5.08287	3.40261	6.24388			0.0312241	0.0387608	0.0261123	0.0178439	0.0323351			7	5	18	8	10			-0.159767	-0.108453	-0.436219		-0.314407	-0.55376			0.877233	0.917756	0.675656		0.765561	0.588254
ABalpapa	119	199.657	199.453	200.793	200.16	201.356			1.00672	n.s.	1.00597	n.s.			5.13784	7.30304	5.8009	3.96544	7.26532			0.0268056	0.0384461	0.0293148	0.0204304	0.0370843			6	5	17	8	9			-0.0524189	-0.198862	-0.467917		-0.376762	-0.427301			0.959655	0.849512	0.65182		0.720272	0.67635
ABalpapp	120	194.027	194.2	196.678	193.439	198.838			1.01276	n.s.	1.02791	n.s.			3.78894	5.50647	5.93099	2.04202	6.73702			0.0201382	0.0297723	0.0305328	0.0108863	0.0345879			8	5	20	8	12			0.061975	0.29676	-1.47781		-0.885858	-2.60246			0.952474	0.77932	0.17272		0.40708	0.0210418
ABalppaa	121	214.885	206.564	211.698	212.083	211.361			1.02485	n.s.	0.996595	n.s.			1.8137	6.72954	5.86928	4.01961	7.40065			0.00896787	0.0346147	0.0281869	0.0196299	0.0361085			4	4	15	7	8			-2.38785	-1.49494	-1.1254		-1.3912	0.238705			0.0860106	0.205004	0.299232		0.231796	0.815703
ABalppap	122	205.656	201.735	201.963	201.771	202.111			1.00113	n.s.	1.00168	n.s.			2.87052	6.94285	5.40979	4.41297	6.34121			0.0148303	0.0361364	0.0272046	0.0226523	0.0322464			4	5	16	7	9			-1.14612	-0.0102788	-0.100079		-0.0671155	-0.126156			0.298716	0.992117	0.922826		0.948818	0.901417
ABalpppa	123	203.933	201.704	201.487	200.189	202.641			0.998923	n.s.	1.01225	n.s.			2.86658	6.3899	5.28604	3.58319	6.43944			0.0147593	0.0332636	0.026621	0.0184584	0.0326603			5	5	17	8	9			-0.711614	0.484808	-0.262114		0.0693472	-0.983873			0.505509	0.646178	0.799515		0.947076	0.343449
ABalpppp	124	196.972	195.473	195.958	194.585	196.873			1.00248	n.s.	1.01176	n.s.			3.90807	5.0993	4.69504	3.52865	5.27901			0.0206674	0.0273913	0.024259	0.018701	0.027373			6	5	20	8	12			-0.538366	0.34173	-0.510153		-0.192878	-1.16151			0.606036	0.743459	0.624056		0.853608	0.260615
ABaraaaa	125	213.787	216.46	215.584	214.726	216.442			0.995953	n.s.	1.00799	n.s.			4.53284	8.0818	4.85109	4.38656	5.47974			0.0225277	0.0396697	0.0229039	0.0211582	0.0262215			4	4	14	7	7			0.576829	0.397061	0.00388544		0.206411	-0.647054			0.59048	0.711416	0.997062		0.847492	0.530354
ABaraaap	126	199.737	201.83	203.713	201.941	205.287			1.00933	n.s.	1.01657	n.s.			5.29727	4.82275	4.34064	2.81741	4.98086			0.0276263	0.0250899	0.021621	0.0143876	0.0249368			6	5	17	8	9			0.685246	-0.0469964	-1.27041		-0.784645	-1.72825			0.510651	0.964109	0.237116		0.462283	0.10781
ABaraapa	127	202.105	200.733	205.138	203.139	206.737			1.02194	n.s.	1.01771	n.s.			4.10901	3.53715	4.05539	2.42358	4.48379			0.0213477	0.0187225	0.0200437	0.0123034	0.0222306			5	4	18	8	10			-0.537705	-1.22442	-2.64872		-2.19117	-2.17168			0.607624	0.2814	0.0325152		0.0807005	0.0471444
ABaraapp	128	197.353	200.192	204.069	201.776	205.852			1.01936	n.s.	1.0202	n.s.			5.99951	4.39415	3.28765	2.84181	2.45662			0.0316665	0.0230471	0.0163622	0.014587	0.0122654			6	5	16	7	9			0.904014	-0.707444	-2.65846		-1.81997	-3.01728			0.389803	0.504346	0.0414463		0.12331	0.0107447
ABarapaa	129	205.45	203.738	207.383	205.195	209.571			1.01789	n.s.	1.02133	n.s.			3.6194	5.20124	6.13316	4.24051	7.18877			0.0184978	0.0268054	0.0300361	0.0213115	0.0353742			5	5	16	8	8			-0.603812	-0.526349	-1.69302		-1.30828	-1.48311			0.564657	0.614266	0.119565		0.227843	0.165284
ABarapap	130	198.19	199.478	201.285	198.696	203.586			1.00906	n.s.	1.02461	n.s.			4.6704	5.62295	6.03003	4.44282	6.54167			0.0245471	0.0295977	0.0303982	0.0230586	0.0330248			6	5	17	8	9			0.408103	0.263766	-1.23411		-0.621038	-1.81948			0.694107	0.79944	0.246603		0.554348	0.0901114
ABarappa	131	207.767	209.271	210.216	207.899	212.534			1.00452	n.s.	1.0223	n.s.			3.15127	6.91518	6.00376	2.20452	7.79128			0.0159257	0.0351095	0.0290699	0.0109825	0.0379682			5	4	14	7	7			0.40271	0.38578	-0.718522		-0.24808	-1.51461			0.707771	0.722856	0.495488		0.815264	0.173921
ABarappp	132	203.956	205.29	206.539	204.256	208.316			1.00609	n.s.	1.01988	n.s.			3.85	5.10624	4.86401	1.86596	5.79965			0.0198205	0.0261169	0.023918	0.00946169	0.028614			5	5	16	7	9			0.466514	0.432838	-1.01117		-0.482848	-1.97289			0.654206	0.683998	0.33731		0.645153	0.0766774
ABarpaaa	133	214.298	211.299	212.742	212.687	212.784			1.00683	n.s.	1.00046	n.s.			2.4802	6.73013	9.21645	7.13751	11.0163			0.012297	0.033842	0.0440958	0.0349571	0.0533899			4	4	14	6	8			-0.836344	-0.311798	-0.288544		-0.346142	-0.0199973			0.452321	0.764445	0.77927		0.739949	0.984379
ABarpaap	134	195.279	194.738	197.92	194.894	200.121			1.01634	n.s.	1.02682	n.s.			4.8616	4.79157	6.67675	3.96903	7.52068			0.0257848	0.025484	0.0341785	0.0210015	0.0384348			7	7	19	8	11			-0.209857	-0.0680435	-1.85488		-1.34154	-1.96014			0.837301	0.946896	0.0821515		0.199597	0.0678439
ABarpapa	135	202.99	201.635	204.438	202.287	206.895			1.0139	n.s.	1.02278	n.s.			2.61279	5.54612	8.62389	4.59866	11.6471			0.0135151	0.0292249	0.0428866	0.0234437	0.0583051			5	4	15	8	7			-0.450288	-0.202983	-1.01094		-0.788026	-0.981758			0.675482	0.846916	0.338729		0.455015	0.356331
ABarpapp	136	200.68	201.961	202.662	200.847	204.275			1.00347	n.s.	1.01707	n.s.			1.79821	5.36681	6.15917	3.60313	7.63483			0.0094086	0.0279022	0.0308384	0.0185003	0.0384135			5	5	17	8	9			0.506034	0.409985	-0.66142		-0.247854	-1.20444			0.634825	0.695425	0.521883		0.810966	0.252273
ABarppaa	137	209.722	207.898	209.016	207.526	210.319			1.00538	n.s.	1.01346	n.s.			4.2458	4.83447	5.62486	3.22753	7.08426			0.0215102	0.0244167	0.0273597	0.0161079	0.0347359			4	5	15	7	8			-0.601866	0.150048	-0.731771		-0.429057	-1.00279			0.566531	0.885267	0.479869		0.679256	0.339483
ABarppap	138	213.148	209.271	208.763	208.479	209.012			0.997575	n.s.	1.00255	n.s.			3.55238	6.91518	5.85437	4.03123	7.38016			0.0177079	0.0351095	0.0285105	0.020027	0.0364132			4	4	15	7	8			-0.997522	0.209436	0.0597779		0.134459	-0.1762			0.369293	0.843879	0.954132		0.899206	0.863315
ABarpppa	139	208.548	204.762	206.056	205.446	206.665			1.00632	n.s.	1.00593	n.s.			6.25626	6.42561	8.30739	4.06313	11.4248			0.0318741	0.0329499	0.0409462	0.0203951	0.0570093			4	5	16	8	8			-0.89129	-0.212922	-0.383886		-0.364828	-0.284325			0.403873	0.8384	0.708403		0.724008	0.78278
ABarpppp	140	212.604	207.748	209.565	210.146	209.057			1.00875	n.s.	0.994819	n.s.			4.87598	5.83769	5.83886	3.55347	7.53187			0.0243679	0.0298562	0.0283262	0.0175134	0.0371537			4	4	15	7	8			-1.27709	-0.746404	-0.331415		-0.553251	0.365061			0.250187	0.494103	0.749096		0.605157	0.722492
ABplaaaa	141	200.226	202.954	207.023	204.257	209.79			1.02005	n.s.	1.02709	n.s.			4.52371	6.81786	6.3669	4.95727	6.69304			0.0237227	0.0352728	0.031235	0.0250282	0.0329005			5	5	16	8	8			0.745445	-0.370548	-1.77126		-1.18323	-1.87899			0.480448	0.72247	0.112229		0.279106	0.0830193
ABplaaap	142	201.681	202.535	205.747	204.537	206.957			1.01586	n.s.	1.01183	n.s.			2.9131	6.52167	5.50599	4.0833	6.70402			0.0151663	0.0338102	0.0271792	0.0205875	0.0334057			5	5	16	8	8			0.267256	-0.615236	-1.17656		-0.995939	-0.87185			0.798948	0.561013	0.270121		0.358341	0.401027
ABplaapa	143	194.936	197.63	202.444	201.061	203.827			1.02436	n.s.	1.01376	n.s.			3.86392	4.86481	5.70235	3.67307	7.19812			0.0204409	0.0256414	0.0286076	0.0188393	0.0364184			8	6	16	8	8			1.11753	-1.4457	-1.91978		-1.96911	-0.968398			0.291646	0.182122	0.0791165		0.075768	0.354798
ABplaapp	144	191.381	192.548	196.227	195.197	196.913			1.0191	n.s.	1.00879	n.s.			4.37771	4.04591	6.20164	3.38391	7.60652			0.0235892	0.0217629	0.0319995	0.0178776	0.0394336			8	7	20	8	12			0.53663	-1.36416	-1.63126		-1.78191	-0.686371			0.600625	0.197965	0.121275		0.0932668	0.502156
ABplapaa	145	203.12	205.78	205.348	203.636	207.06			0.997902	n.s.	1.01681	n.s.			2.29061	4.56662	5.74092	4.59496	6.54327			0.011841	0.0233014	0.0283939	0.0232697	0.0325884			5	5	16	8	8			1.16388	0.821371	-0.414749		0.172985	-1.21101			0.289421	0.433419	0.686487		0.866768	0.248199
ABplapap	146	195.634	200.261	199.525	198.356	200.693			0.99632	n.s.	1.01179	n.s.			3.87633	5.38302	5.78469	4.72023	6.80456			0.0205219	0.028224	0.0294454	0.0245404	0.0349648			7	5	16	8	8			1.64215	0.650604	-0.126943		0.262385	-0.79845			0.145293	0.534119	0.901459		0.800414	0.439551
ABplappa	147	201.608	200.864	204.298	202.747	205.849			1.01709	n.s.	1.0153	n.s.			3.0636	6.11704	6.99841	5.3792	8.39746			0.0159556	0.0317225	0.0347911	0.0273607	0.0420691			5	6	16	8	8			-0.26111	-0.599752	-1.28487		-1.1261	-0.879822			0.800941	0.561931	0.223085		0.285707	0.396352
ABplappp	148	206.782	208.601	212.545	211.743	213.248			1.01891	n.s.	1.00711	n.s.			4.24759	7.62201	5.81998	4.47717	7.02532			0.0218252	0.0388223	0.0278386	0.0218995	0.0339739			4	4	15	7	8			0.417017	-0.753417	-1.02143		-0.962801	-0.500694			0.695025	0.491081	0.34876		0.390364	0.625649
ABplpaaa	149	202.787	204.483	205.518	203.648	207.388			1.00506	n.s.	1.01837	n.s.			2.65719	6.54079	6.39765	4.94083	7.43647			0.0139223	0.0335863	0.0316158	0.0250198	0.0369783			4	5	16	8	8			0.527871	0.245346	-0.73846		-0.310229	-1.18492			0.618162	0.813363	0.47804		0.765963	0.258669
ABplpaap	150	202.807	202.66	202.996	203.121	202.899			1.00166	n.s.	0.998908	n.s.			4.17109	5.15574	4.77607	4.12625	5.47509			0.0218522	0.0267123	0.0238955	0.0210398	0.0277339			4	5	16	7	9			-0.0472099	-0.165472	-0.0812044		-0.129341	0.092403			0.963667	0.87297	0.937087		0.901112	0.927687
ABplpapa	151	201.652	203.738	204.075	203.104	204.829			1.00165	n.s.	1.00849	n.s.			3.78225	5.95487	6.66802	3.84845	8.41396			0.0199286	0.0306894	0.033185	0.0196249	0.042219			4	5	16	7	9			0.638812	0.208972	-0.282043		-0.106996	-0.545968			0.543974	0.840999	0.783139		0.917619	0.595303
ABplpapp	152	197.421	199.921	199.963	198.939	200.708			1.00021	n.s.	1.00889	n.s.			4.95436	4.98628	5.61967	4.46178	6.43894			0.0261411	0.0261883	0.0284733	0.0231288	0.0328102			6	5	19	8	11			0.830396	0.359529	-0.266295		-0.0164343	-0.707329			0.428711	0.728646	0.795395		0.98735	0.488954
ABplppaa	153	213.165	218.643	215.483	213.339	217.091			0.985548	n.s.	1.01759	n.s.			13.0228	7.70171	7.41828	6.93044	7.81002			0.0641473	0.0374266	0.035041	0.0338391	0.0370999			5	4	14	6	8			0.784683	1.10996	0.327462		0.729533	-0.949115			0.459934	0.309145	0.754131		0.500215	0.361973
ABplppap	154	214.876	212.676	212.238	211.152	213.187			0.997937	n.s.	1.00964	n.s.			2.88175	7.98059	5.95754	3.29721	7.71084			0.0142495	0.0398699	0.028538	0.016173	0.0372996			4	4	15	7	8			-0.518418	0.364586	-0.105752		0.10258	-0.678948			0.633103	0.73583	0.919281		0.923306	0.512988
ABplpppa	155	204.511	205.904	207.359	206.47	208.05			1.00707	n.s.	1.00765	n.s.			5.10993	8.77077	4.9479	4.94396	5.13251			0.0265478	0.0452588	0.0242344	0.0248003	0.0253549			4	4	16	7	9			0.274487	-0.118788	-0.455906		-0.319303	-0.62357			0.79507	0.911011	0.672404		0.767667	0.543475
ABplpppa.1	156	204.511	205.904	207.359	206.47	208.05			1.00707	n.s.	1.00765	n.s.			5.10993	8.77077	4.9479	4.94396	5.13251			0.0265478	0.0452588	0.0242344	0.0248003	0.0253549			4	4	16	7	9			0.274487	-0.118788	-0.455906		-0.319303	-0.62357			0.79507	0.911011	0.672404		0.767667	0.543475
ABplpppp	157	206.238	205.904	206.685	205.48	207.622			1.00379	n.s.	1.01042	n.s.			4.71945	8.77077	4.76607	4.76067	4.83072			0.0243137	0.0452588	0.0234199	0.023996	0.0239133			4	4	16	7	9			-0.0671442	0.0893953	-0.367731		-0.171847	-0.886943			0.949285	0.933027	0.732454		0.873141	0.391057
ABpraaaa	158	209.139	209.377	210.95	209.822	212.078			1.00751	n.s.	1.01075	n.s.			2.9654	6.91382	7.12295	4.1485	9.47371			0.0150652	0.0350846	0.034369	0.0204776	0.0462663			4	4	14	7	7			0.0633065	-0.117138	-0.542525		-0.398444	-0.577022			0.952512	0.912055	0.601918		0.706781	0.579382
ABpraaap	159	201.615	202.78	203.163	202.325	204.121			1.00189	n.s.	1.00888	n.s.			1.68085	6.0107	5.35956	3.53869	7.09989			0.00875375	0.0314941	0.0268202	0.0180367	0.036025			5	4	15	8	7			0.375896	0.139769	-0.332814		-0.115788	-0.606563			0.729386	0.895476	0.748563		0.912955	0.559906
ABpraapa	160	201.165	202.712	202.908	202.454	203.305			1.00097	n.s.	1.0042	n.s.			1.60948	7.28813	6.8499	5.83835	8.01496			0.00840084	0.0382002	0.0343213	0.0298678	0.0406553			5	4	15	7	8			0.416446	0.0604652	-0.128461		-0.0484024	-0.236829			0.703188	0.95402	0.901566		0.963458	0.816584
ABpraapp	161	194.933	196.118	198.194	197.252	198.947			1.01058	n.s.	1.00859	n.s.			3.72877	6.1099	5.28512	3.9076	6.28236			0.0198117	0.0327119	0.0270368	0.0204292	0.0323676			7	5	18	8	10			0.385593	-0.370529	-0.837267		-0.691189	-0.700076			0.71284	0.723556	0.425853		0.516244	0.494436
ABprapaa	162	204.414	205.042	206.531	206.796	206.325			1.00726	n.s.	0.997718	n.s.			3.61692	5.01166	6.04725	5.09055	7.0016			0.0185788	0.0256641	0.0297376	0.0254954	0.0348775			5	5	16	7	9			0.227351	-0.593809	-0.396243		-0.550619	0.156006			0.826406	0.567489	0.699542		0.596885	0.878261
ABprapap	163	198.113	200.937	201.8	201.341	202.26			1.0043	n.s.	1.00457	n.s.			2.98753	4.3053	5.86537	4.64668	7.18643			0.0157083	0.0224974	0.0295193	0.0237999	0.0366409			6	5	16	8	8			1.23912	-0.159432	-0.415073		-0.356737	-0.303964			0.255465	0.876786	0.686069		0.729365	0.766369
ABprappa	164	206.335	205.448	205.351	206.206	204.495			0.999525	n.s.	0.991706	n.s.			4.24245	6.0658	5.24772	3.57057	6.72396			0.021589	0.03137	0.0260113	0.017934	0.034055			5	4	14	7	7			-0.247907	-0.228217	0.240785		0.0292053	0.594387			0.813684	0.830106	0.816648		0.977985	0.566682
ABprappp	165	208.523	214.199	213.568	212.748	214.271			0.997054	n.s.	1.00716	n.s.			2.28586	7.52151	5.00659	3.23217	6.33857			0.0116473	0.0373092	0.0238934	0.0158255	0.0306385			4	4	13	6	7			1.44412	0.364078	-0.016095		0.157416	-0.556765			0.230803	0.735391	0.987729		0.882814	0.591003
ABprpaaa	166	203.082	205.196	204.797	204.034	205.669			0.998058	n.s.	1.00801	n.s.			2.16889	8.68678	5.21644	2.87583	7.22369			0.0112139	0.04498	0.0258958	0.0145353	0.0363773			5	4	15	8	7			0.474932	0.260323	-0.0922572		0.0876227	-0.561032			0.664515	0.809881	0.92981		0.934833	0.590818
ABprpaap	167	202.559	203.818	204.795	204.516	205.039			1.00479	n.s.	1.00255	n.s.			2.15801	5.0948	4.16052	3.84399	4.67			0.0111864	0.0265591	0.0206541	0.0194668	0.0234879			5	4	15	7	8			0.462403	-0.238117	-0.402113		-0.353358	-0.237521			0.668631	0.821233	0.702432		0.741107	0.815964
ABprpapa	168	201.165	205.647	204.465	204.632	204.299			0.994252	n.s.	0.998371	n.s.			1.60948	5.78292	4.15713	3.14385	5.20433			0.00840084	0.0295266	0.0206494	0.0158436	0.0262702			5	5	16	8	8			1.66966	0.360691	0.424906		0.424073	0.155052			0.160704	0.731758	0.68222		0.688001	0.879466
ABprpapp	169	199.733	202.489	201.045	201.87	200.467			0.992869	n.s.	0.993052	n.s.			2.61043	5.67973	4.37362	3.85711	4.8154			0.0137231	0.0294521	0.0220743	0.0197893	0.0246214			5	5	17	7	10			0.98584	0.211324	0.682569		0.52456	0.665311			0.364748	0.839018	0.516852		0.620433	0.516206
ABprppaa	170	216.054	219.196	216.346	216.606	216.123			0.986996	n.s.	0.997772	n.s.			3.05762	7.1646	6.04632	3.56241	7.90031			0.0150366	0.0347287	0.0284849	0.0171318	0.0378602			4	4	13	6	7			0.806667	0.670005	0.658954		0.72062	0.145329			0.464484	0.539504	0.531168		0.507535	0.887799
ABprppap	171	211.444	212.191	213.216	213.528	212.905			1.00483	n.s.	0.997081	n.s.			2.99568	6.22187	5.80067	2.81865	8.04563			0.0150532	0.0311546	0.0276914	0.0136718	0.0391395			4	4	14	7	7			0.216313	-0.406474	-0.163986		-0.294894	0.193414			0.838579	0.706685	0.873872		0.780889	0.851802
ABprpppa	172	200.417	205.662	205.538	206.231	205.018			0.999398	n.s.	0.994121	n.s.			9.03791	5.50554	5.32914	2.84042	6.80145			0.0469745	0.028443	0.0263908	0.0143469	0.0342115			6	4	14	6	8			1.13932	-0.190476	0.176018		0.0399443	0.454114			0.287574	0.858035	0.864961		0.969764	0.659554
ABprpppp	173	203.933	207.224	206.682	207.212	206.217			0.997383	n.s.	0.995199	n.s.			2.84834	5.76236	5.64736	4.31841	6.87553			0.0146654	0.0295454	0.0277794	0.0215848	0.0343831			5	4	15	7	8			1.04461	0.00350522	0.267001		0.167914	0.339785			0.352957	0.997339	0.796932		0.873681	0.739935
MSaaaa	174	217.195	217.712	207.494	206.417	208.436			0.953067	n.s.	1.00978	n.s.			3.65058	6.06457	6.67424	5.14746	8.01283			0.0178583	0.0295969	0.032702	0.0258278	0.0396439			4	4	15	7	8			0.14604	3.13502	2.23521		2.92963	-0.587532			0.889682	0.0226263	0.0561171		0.0316118	0.567705
MSaaap	175	224.096	222.709	212.202	210.736	213.667			0.952823	*	1.01391	n.s.			2.90566	4.94138	7.51279	5.28955	9.4499			0.0137765	0.0235744	0.0360362	0.0259967	0.0458067			4	4	14	7	7			-0.483875	3.76694	2.08182		3.3002	-0.716066			0.649516	0.00746695	0.0670799		0.011855	0.491313
MSaapa	176	218.345	216.043	207.537	205.166	209.612			0.96063	n.s.	1.02167	n.s.			3.95854	5.65743	6.29495	4.48804	7.17262			0.0192629	0.0278232	0.0308371	0.0226564	0.0352879			4	4	15	7	8			-0.666745	3.29762	1.6928		2.60715	-1.45717			0.532516	0.0202652	0.130708		0.0461783	0.17097
MSaapp	177				221.28	223.692					1.0109	n.s.						5.52872	10.0567						0.0262345	0.0468309						5	6								-0.503237								0.628402
MSapaa	178				221.802	224.331					1.0114	n.s.						4.7083	14.2033						0.0222889	0.0655756						5	7								-0.438479								0.673059
MSapap	179				220.393	223.704					1.01503	n.s.						4.43619	11.6265						0.021135	0.0538288						5	7								-0.68682								0.511182
MSappa	180				225.507	229.02					1.01558	n.s.						5.28447	13.2823						0.0246054	0.0600677						5	7								-0.633147								0.543606
MSappp	181				229.816	229.553					0.998853	n.s.						4.94831	12.8002						0.0228773	0.057753						4	7								0.0485242								0.962433
MSpaaa	182	220.058	217.741	207.961	206.823	208.957			0.955085	*	1.01032	n.s.			1.79565	3.82074	6.53485	4.3934	8.1507			0.0086699	0.0186439	0.0319471	0.022001	0.0402255			4	4	15	7	8			-1.09761	4.31353	2.54057		3.83705	-0.641803			0.330458	0.00329239	0.0293374		0.00452275	0.534141
MSpaap	183				216.879	219.083					1.01016	n.s.						5.58187	9.18543						0.0268096	0.043424						6	7								-0.530768								0.607113
MSpapa	184	218.942	216.179	207.621	206.13	208.927			0.960413	.	1.01357	n.s.			4.35085	4.3828	6.80294	5.21214	8.06867			0.0211142	0.021541	0.0333122	0.0261888	0.0398265			4	4	15	7	8			-0.894641	3.41036	2.01623		3.04716	-0.806647			0.405437	0.0103802	0.0721095		0.0173397	0.435481
MSpapp	185	233.917	229.996	224.954					0.97808	n.s.					2.67541	2.81432	9.25687					0.0121523	0.0130012	0.0421788					4	4	10					-2.01967		1.06956		1.55223				0.0900632		0.318644		0.147099
MSppaa	186				217.768	223.372					1.02573	n.s.						4.38464	9.83298						0.0209734	0.0455929						6	7								-1.35832								0.209101
MSppap	187				215.724	220.874					1.02387	n.s.						6.40378	12.1242						0.0309219	0.0568525						6	7								-0.97616								0.353558
MSpppa	188				220.952	227.365					1.02902	n.s.						5.14371	11.3638						0.0244437	0.0517656						5	7								-1.31612								0.221221
MSpppp	189				222.204	231.558					1.0421	n.s.						7.20783	9.97175						0.0340598	0.0446016						5	7								-1.8862								0.0886766
Eala	190
Ealp	191
Eara	192
Earp	193
Epla	194
Eplp	195
Epra	196
Eprp	197
Z2	198				199.239	194.131					0.974364	n.s.						22.9636	25.3025						0.12246	0.136854						4	5								0.316845								0.760829
Z3	199
Daa	200
Dap	201
Dpa	202
[truncated: 12 more columns]

## Sheet: Net migration
	Order	WT.mean	C.mean	EQ.mean	EA.mean	ED.mean	INV.mean		EQ.over.C	EQ.C.sign	ED.over.EA	ED.EA.sign	INV.over.EA	INV.EA.sign		WT.sd	C.sd	EQ.sd	EA.sd	ED.sd	INV.sd		WT.vc	C.vc	EQ.vc	EA.vc	ED.vc	INV.vc		WT.n	C.n	EQ.n	EA.n	ED.n	INV.n		C.vs.WT.t.stat	C.vs.EA.t.stat	C.vs.ED.t.stat	C.vs.INV.t.stat	C.vs.EQ.t.stat	EA.vs.ED.t.stat	EA.vs.INV.t.stat		C.vs.WT.p.val	C.vs.EA.p.val	C.vs.ED.p.val	C.vs.INV.p.val	C.vs.EQ.p.val
AB	1
P1	2
ABa	3		4.48663	5.93481	5.5073	6.43357			1.32278	n.s.	1.16819	n.s.					1.50715	1.25306	1.51101	0.688631				0.347918	0.215197	0.284164	0.111497				7	13	7	6				-1.26534	-3.06485		-2.17022	-1.45512				0.229769	0.0140789		0.0537386
ABp	4		8.42734	10.2866	9.89681	10.7414			1.22063	n.s.	1.08534	n.s.					1.61569	1.9658	2.42919	1.31618				0.198568	0.194777	0.254218	0.127639				7	13	7	6				-1.33263	-2.84491		-2.27118	-0.793953				0.21101	0.0159605		0.0386168
EMS	5		8.36294	9.58136	8.87147	10.4096			1.14569	n.s.	1.17338	n.s.					1.67593	1.32661	1.11227	1.10023				0.207557	0.14112	0.129854	0.110098				7	13	7	6				-0.668892	-2.6356		-1.66327	-2.50011				0.5181	0.0241836		0.126774
P2	6		1.84573	2.72277	2.50668	2.97488			1.47517	n.s.	1.18678	n.s.					0.805991	0.808899	0.601552	0.997236				0.452273	0.3028	0.24855	0.349186				7	13	7	6				-1.73874	-2.22064		-2.31817	-1.00407				0.109699	0.0515829		0.0381909
ABal	7	5.60001	4.21843	4.49078	4.67603	4.35845	3.9179		1.06456	n.s.	0.932085	n.s.	0.837869	n.s.		1.9186	1.7997	1.41684	1.35813	1.46725	2.05122		0.351173	0.432552	0.317143	0.294076	0.339651	0.542249		10	18	48	20	28	7		-1.86624	-0.877135	-0.276303	0.340068	-0.578335	0.772241	0.91051		0.078658	0.387056	0.784146	0.740967	0.568146
ABar	8	11.256	9.70897	9.88247	9.80153	9.94028	9.08513		1.01787	n.s.	1.01416	n.s.	0.926909	n.s.		1.68063	1.51836	1.98012	1.85925	2.09388	1.72491		0.153042	0.158559	0.201411	0.192061	0.212527	0.196641		10	18	48	20	28	7		-2.4145	-0.168719	-0.433528	0.838819	-0.3788	-0.241744	0.926504		0.0272062	0.86697	0.666786	0.42147	0.706852
ABpl	9	11.7209	11.3333	10.1038	10.443	9.86153	7.52129		0.891517	n.s.	0.944317	n.s.	0.720221	n.s.		2.47086	2.03228	2.63181	2.66782	2.62727	2.74856		0.216078	0.18181	0.261833	0.258657	0.268795	0.378489		10	18	48	20	28	7		-0.422949	1.16366	2.13328	3.33224	2.01107	0.749224	2.43894		0.678015	0.252414	0.0387372	0.00921612	0.0511851
ABpr	10	7.49208	5.82163	7.27973	7.8825	6.84918	6.37688		1.25046	n.s.	0.86891	n.s.	0.808993	n.s.		2.00186	2.21816	2.65005	2.72573	2.5564	1.48011		0.273877	0.386312	0.365927	0.350117	0.376574	0.240396		10	18	48	20	28	7		-2.03458	-2.56643	-1.44347	-0.725154	-2.25083	1.32862	1.81989		0.0550771	0.0146234	0.156666	0.478462	0.0305444
MS	11	2.84802	4.71972	6.51906	6.53096	6.51056	6.23262		1.38124	*	0.996877	n.s.	0.954319	n.s.		1.15165	1.32788	2.79136	2.17501	3.19908	1.33085		0.414478	0.285485	0.430414	0.337195	0.495755	0.221155		10	17	48	20	28	7		3.84998	-3.10507	-2.61435	-2.53297	-3.48844	0.0262897	0.426391		0.000912582	0.00396442	0.0126231	0.0274582	0.000939757
E	12	6.78232	6.79971	5.53074	5.72622	5.39111	4.48668		0.813379	.	0.941478	n.s.	0.783532	n.s.		0.908936	1.6365	2.14534	1.89554	2.33126	1.30899		0.137366	0.244211	0.389914	0.335167	0.436287	0.30217		10	17	48	20	28	7		0.035492	1.84867	2.37542	3.64669	2.52075	0.548144	1.90264		0.97197	0.072971	0.0221731	0.00263394	0.0161815
C	13	8.7047	10.3755	9.8449	11.1255	8.93022	6.46455		0.948862	n.s.	0.802683	.	0.58106	n.s.		1.23929	1.67993	2.78978	1.57597	3.11735	3.27912		0.145929	0.164295	0.284849	0.143425	0.352196	0.525363		10	17	48	20	28	7		2.95543	-1.3922	2.0177	2.99769	0.926224	3.19783	3.61726		0.00698981	0.173111	0.0499544	0.0189385	0.359042
P3	14	3.83956	4.78181	4.36514	4.25322	4.44109	4.21071		0.912864	n.s.	1.04417	n.s.	0.990006	n.s.		0.917903	1.07817	1.36049	0.960869	1.58843	1.85245		0.245041	0.228996	0.313329	0.228888	0.360861	0.455649		10	16	47	19	28	7		2.37873	1.51806	0.844535	0.761213	1.24485	-0.504458	0.0579063		0.0266643	0.139321	0.403321	0.468801	0.222077
ABala	15	2.67635	6.54337	5.71155	6.14433	5.36893	7.00238		0.872876	n.s.	0.873803	n.s.	1.13965	n.s.		0.985396	2.0107	2.28422	2.07605	2.42439	1.68171		0.377392	0.31241	0.402256	0.342327	0.456263	0.250169		10	15	43	19	24	6		6.38651	0.566384	1.63744	-0.533274	1.33049	1.12894	-1.02689		2.19881e-06	0.575261	0.110778	0.604394	0.194253
ABalp	16	5.86774	3.27106	3.25647	2.86432	3.56693	3.03826		0.99554	n.s.	1.2453	n.s.	1.06073	n.s.		2.47838	1.66951	1.26494	1.13332	1.29963	1.41141		0.432933	0.518362	0.390696	0.400875	0.368152	0.4839		10	16	43	19	24	6		-2.92438	0.827153	-0.598255	0.327201	0.0317255	-1.89151	-0.275159		0.0109955	0.415771	0.554707	0.749859	0.97498
ABara	17	5.45214	4.23096	3.4689	3.77145	3.22938	3.18937		0.819884	n.s.	0.856268	n.s.	0.84566	n.s.		2.68485	1.44316	1.54307	1.58506	1.49876	1.18755		0.504751	0.346424	0.447415	0.425807	0.468937	0.38786		10	16	43	19	24	6		-1.32376	0.897038	2.11735	1.72355	1.76917	1.14071	0.960482		0.209652	0.376241	0.0418174	0.112864	0.0875197
ABarp	18	2.65213	3.27156	4.34336	3.8847	4.70647	5.01084		1.32761	n.s.	1.21154	n.s.	1.28989	n.s.		1.28697	1.3133	2.049	1.86786	2.15055	2.66888		0.49739	0.4077	0.474498	0.487152	0.461694	0.554813		10	16	43	19	24	6		1.18461	-1.13578	-2.61758	-1.52842	-2.3647	-1.33956	-0.961855		0.25037	0.264463	0.0126656	0.177823	0.0227261
ABpla	19	6.77498	5.44962	5.26276	5.09799	5.3932	5.06399		0.965711	n.s.	1.05791	n.s.	0.993331	n.s.		2.26458	1.22635	1.54307	1.65347	1.47248	1.92486		0.342613	0.22855	0.29491	0.328606	0.275869	0.395944		10	16	43	19	24	6		-1.70138	0.720935	0.131416	0.45717	0.483494	-0.609955	0.0389632		0.113887	0.476098	0.896178	0.662242	0.631872
ABplp	20	4.74535	4.40531	6.09958	5.80678	6.33138	6.34507		1.3846	*	1.09034	n.s.	1.0927	n.s.		1.11858	1.51787	2.03898	2.25066	1.87101	1.58272		0.241614	0.350297	0.336226	0.392692	0.298592	0.259834		10	15	43	19	24	6		-0.644099	-2.162	-3.51969	-2.56681	-3.38664	-0.81683	-0.650806		0.525971	0.0383656	0.00123995	0.0305438	0.00185062
ABpra	21	2.846	3.87939	4.53734	4.40447	4.64252	3.22344		1.1696	n.s.	1.05405	n.s.	0.731856	n.s.		1.45374	1.40552	1.7921	1.56373	1.98114	1.3808		0.52357	0.367966	0.397264	0.359705	0.431182	0.44621		10	16	43	19	24	6		1.78595	-1.04563	-1.42447	0.987507	-1.47803	-0.440365	1.76753		0.0902915	0.303371	0.162515	0.34871	0.14856
ABprp	22	5.82366	5.71173	5.19116	5.32471	5.08544	5.13389		0.908859	n.s.	0.955064	n.s.	0.964165	n.s.		1.77156	1.02247	1.69942	1.30935	1.97629	1.48016		0.311806	0.181809	0.329272	0.249136	0.392665	0.300323		10	16	43	19	24	6		-0.181759	0.981244	1.31141	0.880702	1.4301	0.475722	0.282762		0.858617	0.333646	0.197972	0.408205	0.159627
MSa	23	5.40245	6.65088	6.18973	6.61286	5.85858	6.18178		0.930663	n.s.	0.885938	n.s.	0.934812	n.s.		1.17866	1.49707	1.56389	1.03595	1.83205	1.52393		0.223626	0.229422	0.254199	0.158833	0.316111	0.256792		10	13	41	18	23	6		2.23745	0.0789273	1.40426	0.62716	0.9573	1.66368	0.644998		0.0362421	0.937873	0.170712	0.545108	0.349315
MSp	24	2.32504	2.86875	3.33748	2.94551	3.64424	2.93725		1.16339	n.s.	1.23722	n.s.	0.997193	n.s.		0.576139	1.1738	1.42193	0.847036	1.70226	1.76027		0.253992	0.417038	0.428648	0.291562	0.472187	0.624262		10	13	41	18	23	6		1.45739	-0.201017	-1.61012	-0.0868258	-1.18943	-1.71574	0.0110856		0.161957	0.842651	0.117054	0.933196	0.245811
Ea	25	8.98449	9.88243	9.43346	9.62231	9.31029	7.74691		0.954569	n.s.	0.967573	n.s.	0.805099	n.s.		1.10001	1.5294	2.1047	1.61683	2.39715	2.10683		0.125495	0.157736	0.224578	0.17083	0.260271	0.283289		10	13	38	15	23	6		1.63686	0.43706	0.872739	2.22678	0.82453	0.47912	1.96158		0.116601	0.665708	0.389042	0.0585648	0.416443
Ep	26	7.01841	6.48144	5.12579	5.62995	4.79699	4.96688		0.790841	**	0.85205	n.s.	0.882225	n.s.		0.837277	0.801118	1.52189	1.24675	1.6186	1.44862		0.12228	0.125979	0.298862	0.225141	0.341088	0.303808		10	13	38	15	23	6		-1.55353	2.17693	4.16866	2.39738	4.08151	1.7859	0.984755		0.13675	0.0394959	0.000202383	0.0505767	0.000207226
Ca	27	3.46807	3.31689	3.8186	2.96558	4.37492	4.13493		1.15126	n.s.	1.47523	*	1.39431	n.s.		1.13309	0.751006	1.20746	0.974936	1.01365	1.76859		0.334889	0.230773	0.318286	0.33423	0.234215	0.445541		10	13	38	15	23	6		-0.364747	1.07524	-3.56541	-1.08858	-1.75469	-4.28769	-1.52926		0.720446	0.292264	0.00119016	0.31914	0.0883251
Cp	28	3.30935	5.62943	5.02279	5.25759	4.86965	4.53469		0.892237	n.s.	0.926214	n.s.	0.862504	n.s.		1.08354	1.56004	1.16437	1.0471	1.233	2.19201		0.335604	0.282452	0.233342	0.202478	0.255954	0.503529		10	13	38	15	23	6		4.20366	0.728812	1.50959	1.10135	1.28496	1.0398	0.773291		0.000404848	0.474354	0.146355	0.305088	0.216227
D	29	8.3585	8.23375	5.46738	6.53406	4.77172	3.81735		0.664021	.	0.730283	n.s.	0.584222	n.s.		1.4972	3.36142	2.62726	2.93048	2.20503	2.42137		0.183601	0.416101	0.483696	0.455967	0.467126	0.660735		10	13	38	15	23	6		-0.11931	1.41558	3.33047	3.25022	2.69865	1.99048	2.18234		0.906393	0.169712	0.00372947	0.00609447	0.0150562
P4	30	14.613	13.6972	8.37424	9.40097	7.70463	4.97495		0.611384	*	0.819556	n.s.	0.529195	.		1.32207	3.4664	3.22726	2.99937	3.2564	1.64283		0.0927344	0.258826	0.387915	0.324366	0.427249	0.346731		10	11	38	15	23	5		-0.813534	3.30272	4.80806	6.82732	4.55362	1.64702	4.14622		0.430469	0.00359998	0.000127288	8.66486e-06	0.00035767
ABalaa	31	1.49356	2.38024	2.63365	2.498	2.72212	2.43153		1.10646	n.s.	1.08972	n.s.	0.973391	n.s.		0.57827	0.765381	1.33306	1.15121	1.45759	1.36429		0.396856	0.327741	0.509495	0.468533	0.541284	0.589135		10	13	38	15	23	5		3.16466	-0.322406	-0.922193	-0.079401	-0.83626	-0.527185	0.0979383		0.00467088	0.749881	0.362944	0.939792	0.408387
ABalap	32	2.57675	2.88516	2.77675	2.63328	2.87032	1.41802		0.962425	n.s.	1.09002	n.s.	0.5385	.		1.26338	1.37066	1.30816	1.15793	1.41479	0.374193		0.502555	0.484207	0.474211	0.447059	0.498262	0.277079		10	13	38	15	23	5		0.559238	0.520814	0.0308409	3.53227	0.249005	-0.564365	3.54692		0.582137	0.607334	0.975635	0.00291986	0.805894
ABalpa	33	3.20489	2.96925	3.74439	4.17206	3.46547	3.97009		1.26106	n.s.	0.830636	n.s.	0.951589	n.s.		0.850094	1.14984	1.62867	1.32634	1.77076	1.68296		0.27188	0.394697	0.437824	0.323209	0.516527	0.445104		10	13	38	15	23	5		-0.564965	-2.57037	-1.01709	-1.2244	-1.87172	1.4031	0.244257		0.578088	0.0162367	0.316468	0.270591	0.0711566
ABalpp	34	2.59453	4.12997	3.07407	3.37039	2.88083	2.42815		0.744334	*	0.854747	n.s.	0.720436	n.s.		1.00159	1.06694	1.01129	1.00295	0.99045	1.39212		0.395691	0.263309	0.33114	0.302538	0.347544	0.60199		10	13	38	15	23	5		3.54229	1.93166	3.46158	2.46883	3.12072	1.478	1.39739		0.00203374	0.0648582	0.00207054	0.0491354	0.00540854
ABaraa	35	3.82373	3.81586	2.74869	2.60147	2.84471	1.74325		0.720334	n.s.	1.0935	n.s.	0.670103	n.s.		1.12109	1.47097	1.27862	1.14594	1.37459	1.19048		0.300522	0.392901	0.468235	0.447838	0.488461	0.717054		10	13	38	15	23	5		-0.0145595	2.40963	1.9478	3.09003	2.33172	-0.59045	1.40901		0.988521	0.0245332	0.0634153	0.0128648	0.0311266
ABarap	36	1.74694	2.34558	2.89402	2.97454	2.84151	2.94888		1.23382	n.s.	0.955277	n.s.	0.991373	n.s.		0.958702	0.85199	0.959444	0.842773	1.04349	1.02654		0.56251	0.370217	0.333708	0.288051	0.371224	0.365519		10	13	38	15	23	5		1.55743	-1.95795	-1.54388	-1.16842	-1.93825	0.432308	0.0505089		0.136573	0.0613269	0.133301	0.285239	0.0648272
ABarpa	37	3.24005	3.32309	2.50131	2.24283	2.66988	3.25191		0.752705	n.s.	1.19041	n.s.	1.44992	n.s.		1.06002	1.24542	1.18844	0.968793	1.30493	2.54237		0.33534	0.381984	0.478252	0.43915	0.494073	0.820898		10	13	38	15	23	5		0.172532	2.53298	1.48554	0.0598991	2.07744	-1.15542	-0.866781		0.864693	0.0187398	0.149406	0.954669	0.0508493
ABarpp	38	1.67207	3.42164	3.89979	4.44732	3.54271	2.7082		1.13974	n.s.	0.796594	n.s.	0.608952	n.s.		1.02912	1.76004	1.62182	1.60159	1.56642	1.32186		0.630862	0.524276	0.41861	0.366126	0.446959	0.512499		10	13	38	15	23	5		2.98214	-1.60322	-0.206128	0.930595	-0.862258	1.71666	2.41064		0.00741674	0.12167	0.838531	0.374427	0.399051
ABplaa	39	1.96234	2.33021	3.30027	3.16689	3.38726	2.11659		1.4163	.	1.06959	n.s.	0.668349	n.s.		0.734815	1.04542	1.16955	1.28803	1.10665	0.411009		0.38382	0.457264	0.35671	0.413498	0.330259	0.203894		10	13	38	15	23	5		0.990041	-1.8963	-2.85259	0.622261	-2.79958	-0.544437	2.76407		0.333489	0.0691242	0.00834457	0.542599	0.0101541
ABplap	40	2.41652	3.54698	4.0062	4.54014	3.65797	3.07114		1.12947	n.s.	0.805695	n.s.	0.676441	n.s.		0.445992	0.780975	1.6538	2.0339	1.28304	1.4759		0.189173	0.224414	0.415525	0.455448	0.354565	0.504601		10	13	38	15	23	5		4.37361	-1.74832	-0.32244	0.684981	-1.33181	1.4968	1.74162		0.000305376	0.0969464	0.749109	0.524471	0.189827
ABplpa	41	1.50053	1.9074	2.71759	2.78485	2.67373	2.53913		1.42476	.	0.960097	n.s.	0.911763	n.s.		0.66487	0.793403	1.26253	1.36516	1.22055	1.55447		0.454167	0.423959	0.467634	0.498378	0.46146	0.642816		10	13	38	15	23	5		1.33686	-2.11164	-2.27773	-0.866354	-2.69511	0.255597	0.315263		0.195707	0.0458058	0.029312	0.427262	0.0109047
ABplpp	42	3.76806	4.68864	4.54112	4.74974	4.40506	3.07546		0.968536	n.s.	0.927431	n.s.	0.6475	n.s.		1.85664	1.55869	1.86126	2.06374	1.75128	0.800613		0.505049	0.338832	0.412565	0.441737	0.401883	0.273339		10	13	38	15	23	5		1.26261	-0.0890509	0.501125	2.8739	0.279766	0.53359	2.60802		0.223259	0.929735	0.62026	0.0121553	0.78199
ABpraa	43	2.64331	3.14213	2.33937	2.43057	2.27989	2.69999		0.744518	n.s.	0.93801	n.s.	1.11085	n.s.		0.591465	1.52112	1.33642	1.08022	1.50062	2.18867		0.229353	0.493413	0.575033	0.451839	0.66535	0.851151		10	13	38	15	23	5		1.08089	1.40696	1.64156	0.414817	1.69242	0.359457	-0.264725		0.295443	0.173866	0.11333	0.693801	0.107117
ABprap	44	2.65013	4.07525	4.85126	4.92143	4.8055	4.30541		1.19042	n.s.	0.976444	n.s.	0.87483	n.s.		0.696119	1.55588	1.96241	1.65646	2.17374	1.8079		0.26924	0.389129	0.407177	0.342191	0.457261	0.440909		10	13	38	15	23	5		2.94185	-1.39274	-1.16686	-0.251141	-1.44713	0.186025	0.673483		0.00891891	0.175583	0.251913	0.809541	0.159763
ABprpa	45	4.32844	4.67978	4.02962	3.57327	4.32723	3.13465		0.861071	n.s.	1.211	n.s.	0.877248	n.s.		1.25034	1.46338	1.69412	2.0221	1.41078	1.07716		0.296088	0.318716	0.423184	0.575328	0.329567	0.360811		10	13	38	15	23	5		0.620053	1.67322	0.703308	2.45295	1.32642	-1.25813	0.617447		0.541985	0.106623	0.488557	0.0340571	0.197238
ABprpp	46	5.41625	5.75908	6.26019	6.34894	6.20231	6.84176		1.08701	n.s.	0.976905	n.s.	1.07762	n.s.		0.993769	1.65776	1.57639	1.59909	1.59474	1.42727		0.188066	0.293387	0.253468	0.256064	0.259916	0.219042		10	13	38	15	23	5		0.615596	-0.954523	-0.78112	-1.37631	-0.952473	0.276581	-0.648288		0.5451	0.348907	0.4423	0.204021	0.352254
MSaa	47	2.73525	2.25823	2.3207	2.04627	2.48774	2.81438		1.02766	n.s.	1.21575	n.s.	1.37537	n.s.		1.59187	0.947305	1.08992	0.699098	1.25618	1.17651		0.596533	0.427557	0.472826	0.347746	0.510436	0.438938		10	13	37	14	23	5		-0.840069	0.657457	-0.618639	-0.945662	-0.196429	-1.37214	-1.3757		0.415185	0.517704	0.540673	0.380163	0.845926
MSap	48	4.28359	5.58444	4.64384	4.80898	4.54333	4.14288		0.831569	n.s.	0.944758	n.s.	0.861488	n.s.		0.7415	1.32799	1.51754	1.29937	1.65615	0.773837		0.17743	0.242375	0.328992	0.275022	0.368485	0.196127		10	13	37	14	23	5		2.97932	1.53186	2.06207	2.85235	2.11436	0.54244	1.35865		0.00757263	0.138236	0.0480127	0.0138259	0.0451247
MSpa	49	1.84221	2.40272	2.64683	2.68634	2.62277	2.99834		1.1016	n.s.	0.976336	n.s.	1.11614	n.s.		0.768106	0.906383	1.13735	1.14349	1.15865	1.11455		0.427371	0.384487	0.432605	0.433271	0.446567	0.390308		10	13	37	14	23	5		1.60344	-0.716741	-0.631159	-1.06696	-0.779169	0.163175	-0.533627		0.123951	0.480331	0.532669	0.326006	0.442843
MSpp	50	5.96755	5.83706	6.55785	6.36319	6.67634	6.05028		1.12348	n.s.	1.04921	n.s.	0.950825	n.s.		1.57023	1.3616	1.74252	1.76937	1.75496	3.7763		0.269707	0.237754	0.267511	0.283029	0.26572	0.65536		10	13	37	14	23	5		-0.209176	-0.869388	-1.59603	-0.12321	-1.52065	-0.523713	0.178423		0.83667	0.393175	0.120805	0.90736	0.14005
Caa	51	2.8113	2.72643	2.6736	3.01658	2.46483	2.77823		0.980622	n.s.	0.817094	n.s.	0.920988	n.s.		1.12471	0.583678	1.04052	1.24115	0.860803	1.32031		0.410071	0.218947	0.391815	0.418791	0.353031	0.498995		10	11	37	14	23	5		-0.213863	-0.772687	1.0407	-0.0840767	0.215268	1.46291	0.351927		0.833914	0.449041	0.30695	0.936439	0.831001
Cap	52	5.22462	5.66087	3.96136	4.23321	3.78837	4.45517		0.69978	*	0.894917	n.s.	1.05243	n.s.		1.38115	1.38856	1.31446	1.23726	1.36066	0.958128		0.270963	0.250866	0.334123	0.297494	0.363248	0.225813		10	11	36	14	22	5		0.721067	2.67601	3.67626	2.01261	3.59668	1.01126	-0.4101		0.479726	0.0144045	0.00152395	0.0688306	0.00244013
Cpa	53	2.69391	2.33136	2.88077	2.68003	3.00296	3.01382		1.23566	n.s.	1.1205	n.s.	1.12455	n.s.		1.28807	0.960721	1.1211	1.42141	0.906386	1.49817		0.490094	0.420671	0.391795	0.539844	0.305111	0.521954		10	12	37	14	23	5		-0.735722	-0.741283	-2.00113	-0.941151	-1.64991	-0.7611	-0.433385		0.472294	0.466066	0.0582859	0.386584	0.113445
Cpp	54	6.88322	6.81947	5.47056	6.03102	5.11391	5.85548		0.802198	n.s.	0.847935	n.s.	0.970893	n.s.		1.82286	1.36844	1.96176	1.89953	1.95905	2.11721		0.271447	0.205228	0.361094	0.320584	0.387435	0.379657		10	11	36	14	22	5		-0.0899312	1.20523	2.90505	0.933345	2.5623	1.39505	0.163393		0.929415	0.240437	0.00719213	0.389226	0.0171529
ABalaaa	55	2.75825	2.10809	2.55553	2.38914	2.66646	4.40991		1.21225	n.s.	1.11607	n.s.	1.84581	n.s.		1.53854	1.01228	1.23689	1.29133	1.21845	1.0676		0.571742	0.4911	0.487462	0.550154	0.462395	0.257221		10	11	35	14	21	4		-1.13201	-0.61001	-1.3794	-3.74342	-1.20943	-0.636532	-3.17906		0.275018	0.547836	0.180479	0.0128248	0.240412
ABalaap	56	4.91172	5.18353	4.70087	5.20198	4.3668	4.15025		0.906887	n.s.	0.839449	n.s.	0.797821	n.s.		1.22182	0.794827	2.11568	1.7504	2.30757	2.51655		0.254974	0.156822	0.453276	0.342496	0.534726	0.644259		10	11	35	14	21	4		0.597818	-0.0351104	1.46453	0.806682	1.12118	1.21512	0.783454		0.558748	0.972358	0.154477	0.475162	0.268529
ABalapa	57	2.65615	2.92167	2.30157	2.47061	2.18887	2.73168		0.787758	n.s.	0.885962	n.s.	1.10567	n.s.		0.89033	0.908323	1.01261	1.07627	0.978201	2.23732		0.343575	0.317957	0.443108	0.443407	0.452218	0.870215		10	11	35	14	21	4		0.676002	1.13567	2.1104	0.164963	1.92007	0.786558	-0.226024		0.507237	0.267867	0.0465244	0.87839	0.0703959
ABalapp	58	3.83415	4.16691	4.21951	4.10104	4.2985	2.55292		1.01262	n.s.	1.04815	n.s.	0.622506	n.s.		1.44447	0.465598	1.64204	1.41904	1.80511	1.29166		0.386156	0.114276	0.391934	0.352199	0.42494	0.537575		10	11	35	14	21	4		0.696342	0.162875	-0.314671	2.44206	-0.16913	-0.361105	2.06704		0.501068	0.872606	0.755664	0.0848501	0.866472
ABalpaa	59	2.39329	2.90934	2.26253	2.15083	2.33699	4.49536		0.777677	n.s.	1.08656	n.s.	2.09006	n.s.		1.05923	1.46728	1.12421	0.811711	1.30603	2.31284		0.453646	0.515795	0.50043	0.384134	0.565502	0.54665		10	11	35	14	21	4		0.92998	1.53941	1.08759	-1.28096	1.34337	-0.519768	-1.99265		0.364599	0.144903	0.290793	0.270788	0.200688
ABalpap	60	1.70823	1.78385	2.67275	1.98592	3.13064	4.98889		1.49831	.	1.57642	n.s.	2.51214	n.s.		1.00156	0.654766	1.44946	0.961752	1.55564	3.96617		0.600973	0.375394	0.546184	0.492934	0.502822	0.844688		10	11	35	14	21	4		0.202628	-0.623459	-3.42958	-1.60824	-2.8251	-2.6884	-1.50173		0.842099	0.539218	0.00182513	0.204388	0.0074901
ABalppa	61	4.71743	3.64539	3.07493	3.20344	2.98926	4.56635		0.843513	n.s.	0.93314	n.s.	1.42545	n.s.		1.43683	1.10955	1.21711	1.05979	1.33003	2.03413		0.312192	0.311287	0.398643	0.336737	0.450233	0.473302		10	11	35	14	21	4		-1.89998	1.00823	1.48146	-0.860169	1.45252	0.528137	-1.29092		0.074609	0.324753	0.151528	0.442228	0.163355
ABalppp	62	3.08613	2.01897	3.56561	2.70361	4.14028	5.1622		1.76605	**	1.53139	*	1.90938	n.s.		0.713414	0.791557	1.36034	0.864816	1.33898	2.66659		0.236947	0.400971	0.384242	0.325587	0.327253	0.548845		10	11	35	14	21	4		-3.24944	-2.06069	-5.62274	-2.32061	-4.66685	-3.85627	-1.8169		0.00421911	0.0511326	4.29642e-06	0.0976904	6.10076e-05
ABaraaa	63	2.12942	1.44092	2.44452	2.35842	2.50191	5.77379		1.6965	*	1.06084	n.s.	2.44816	n.s.		1.14246	0.639679	1.40937	1.5695	1.32927	1.33262		0.549926	0.454028	0.580663	0.677369	0.537627	0.24523		10	11	35	14	21	4		-1.68117	-1.98731	-3.04586	-6.24638	-3.27422	-0.281355	-4.33781		0.115135	0.062296	0.00481049	0.00509035	0.00226853
ABaraap	64	3.66929	2.24706	2.51166	3.0522	2.15129	2.87811		1.11775	n.s.	0.704833	n.s.	0.942964	n.s.		1.52455	1.22587	1.31713	1.67252	0.888849	1.57155		0.425876	0.55794	0.528152	0.557758	0.418088	0.580161		10	11	35	14	21	4		-2.34117	-1.38812	0.229439	-0.726713	-0.613212	1.84889	0.192569		0.0314313	0.178445	0.821495	0.504114	0.547458
ABarapa	65	2.3724	1.56057	2.82969	2.00518	3.37936	5.33822		1.81324	*	1.68532	.	2.66222	n.s.		1.49971	1.11698	1.42056	0.850641	1.47212	2.94817		0.647953	0.732015	0.505606	0.431797	0.440807	0.586792		10	11	35	14	21	4		-1.39569	-1.0942	-3.90783	-2.49834	-3.06835	-3.49176	-2.23467		0.181226	0.288082	0.000600707	0.0797488	0.00580142
ABarapp	66	6.14902	4.61291	3.6177	4.81706	2.81812	3.42995		0.784255	n.s.	0.585028	*	0.712042	n.s.		1.78581	1.04031	1.75828	1.24276	1.60422	2.62833		0.297682	0.230647	0.489495	0.262598	0.57603	0.81418		10	11	35	14	21	4		-2.37794	-0.446887	3.8184	0.875566	2.30316	4.14235	1.02333		0.0319811	0.659159	0.000670555	0.439555	0.0286053
ABarpaa	67	2.9436	2.59409	3.01277	2.95966	3.04995	5.13763		1.1614	n.s.	1.03051	n.s.	1.73589	n.s.		1.93796	0.983009	1.53689	1.67043	1.4798	2.35958		0.674822	0.387555	0.513878	0.574477	0.491253	0.487979		10	11	34	14	20	4		-0.513423	-0.6822	-1.02619	-2.09095	-1.05559	-0.162481	-1.72658		0.616231	0.502382	0.313661	0.117243	0.300525
ABarpap	68	3.87244	4.16119	3.56214	4.30411	3.0675	3.3932		0.856039	n.s.	0.712693	n.s.	0.788363	n.s.		1.36917	1.63677	1.42183	1.13892	1.39691	1.24168		0.362406	0.402281	0.402002	0.269337	0.460811	0.388805		10	11	35	14	21	4		0.439823	-0.246474	1.88548	0.968359	1.09133	2.87059	1.3174		0.665057	0.808242	0.0758036	0.364539	0.292283
ABarppa	69	2.47304	1.58457	3.54952	3.36182	3.67466	4.43423		2.24005	***	1.09306	n.s.	1.319	n.s.		1.32899	0.853493	1.44129	1.43943	1.46409	1.73386		0.550826	0.550868	0.408953	0.435816	0.403174	0.415457		10	11	35	14	21	4		-1.80293	-3.83988	-5.09477	-3.15116	-5.54498	-0.625581	-1.13069		0.0913851	0.000913468	1.85987e-05	0.0407544	5.53199e-06
ABarppp	70	3.24085	3.80715	3.14976	3.44248	2.95461	3.81555		0.827327	n.s.	0.85828	n.s.	1.10837	n.s.		1.45628	0.803938	1.37696	1.34887	1.39305	1.22956		0.460587	0.215964	0.440285	0.398829	0.477098	0.342391		10	11	35	14	21	4		1.08817	0.839456	2.19275	-0.0127152	1.95625	1.03457	-0.523481		0.295252	0.410385	0.0363294	0.990467	0.0599454
ABplaaa	71	3.65175	3.59501	3.65295	4.04413	3.39217	4.25998		1.01612	n.s.	0.838789	n.s.	1.05337	n.s.		1.67278	1.05858	1.43162	1.41117	1.41819	1.22071		0.469528	0.301151	0.394706	0.355174	0.423054	0.304463		10	11	35	14	21	4		-0.0918369	-0.909004	0.456251	-0.96545	-0.14467	1.33634	-0.300851		0.928046	0.372787	0.651983	0.380784	0.886254
ABplaap	72	1.81731	2.45411	2.93505	2.31883	3.34586	3.63241		1.19597	n.s.	1.44291	n.s.	1.56648	n.s.		0.457	1.1368	1.31567	0.751403	1.46036	2.31641		0.257758	0.473748	0.451463	0.32983	0.441665	0.677563		10	11	35	14	21	4		1.71195	0.340543	-1.90538	-0.975528	-1.17709	-2.72656	-1.11748		0.109936	0.737734	0.0681526	0.391146	0.253554
ABplapa	73	3.56831	3.86705	3.85649	4.44175	3.46632	3.68472		0.99727	n.s.	0.780394	n.s.	0.829564	n.s.		1.32018	1.15513	1.49576	1.10102	1.61736	1.27039		0.379224	0.305501	0.390627	0.252306	0.472148	0.36632		10	11	35	14	21	4		0.54947	-1.26044	0.808168	0.251693	0.0245308	2.12275	1.08141		0.589425	0.22127	0.426084	0.811411	0.980655
ABplapp	74	2.61184	2.57009	3.44245	3.3546	3.50101	3.90112		1.33942	n.s.	1.04365	n.s.	1.16292	n.s.		1.06391	1.19016	1.57749	1.27477	1.77908	1.45446		0.417525	0.473605	0.46152	0.386794	0.51421	0.396135		10	11	35	14	21	4		-0.0848699	-1.58544	-1.76087	-1.64132	-1.95127	-0.283463	-0.680531		0.933253	0.12698	0.0891958	0.167296	0.063809
ABplpaa	75	5.40861	3.95982	3.40974	3.94829	3.05071	4.37908		0.861086	n.s.	0.772668	n.s.	1.10911	n.s.		1.62277	1.15866	1.33154	0.952287	1.4444	1.49257		0.307536	0.299253	0.3933	0.245497	0.479098	0.362144		10	11	35	14	21	4		-2.33378	0.0266743	1.93212	-0.508811	1.32365	2.21558	-0.546351		0.0328416	0.978994	0.0648845	0.635373	0.201278
ABplpap	76	2.88534	2.07394	2.8882	2.09884	3.41445	4.16134		1.39262	n.s.	1.62683	n.s.	1.98269	n.s.		1.25993	1.20769	1.4887	0.931675	1.57367	2.52779		0.447582	0.595553	0.519125	0.451827	0.466373	0.645412		10	11	35	14	21	4		-1.50328	-0.0564435	-2.67824	-1.58701	-1.83964	-3.10155	-1.60109		0.149536	0.955596	0.0127524	0.197436	0.0803775
ABplppa	77	5.03151	5.43551	4.42754	4.91327	4.10372	4.61927		0.814559	n.s.	0.835234	n.s.	0.940163	n.s.		1.74712	1.42339	1.63263	1.45723	1.69582	2.32372		0.355917	0.26782	0.371379	0.301886	0.418158	0.53449		10	11	35	14	21	4		0.577479	0.901138	2.35015	0.659008	1.97549	1.50687	0.23992		0.571002	0.37734	0.0273932	0.547187	0.0629021
ABplppp	78	3.94557	3.51174	2.90332	2.58562	3.11513	4.32642		0.826749	n.s.	1.20479	n.s.	1.67326	n.s.		1.30471	1.32862	1.4599	1.4874	1.43785	1.51956		0.338945	0.386937	0.506429	0.585532	0.467066	0.37318		10	11	35	14	21	4		-0.754402	1.641	0.779427	-0.948496	1.29312	-1.04556	-2.0301		0.459918	0.114665	0.444066	0.388245	0.212096
ABpraaa	79	2.53874	2.43726	3.68266	3.0641	4.09503	6.36255		1.51099	n.s.	1.33645	n.s.	2.07648	n.s.		0.770727	1.4006	1.66416	0.783876	1.96526	2.90081		0.311176	0.587723	0.455118	0.260394	0.485626	0.484415		10	11	35	14	21	4		-0.208128	-1.32973	-2.75436	-2.59844	-2.45445	-2.15996	-2.2508		0.837784	0.20369	0.0104074	0.0683448	0.0235473
ABpraap	80	4.9527	2.88891	3.03854	3.60241	2.66262	3.82414		1.05179	n.s.	0.739123	n.s.	1.06155	n.s.		1.50712	0.88733	1.43835	1.52143	1.28122	1.98591		0.311909	0.314131	0.476751	0.429879	0.486916	0.551767		10	11	35	14	21	4		-3.77603	-1.46587	0.584771	-0.909427	-0.413894	1.90447	-0.206645		0.00197884	0.157183	0.563484	0.422191	0.682131
ABprapa	81	3.35708	2.82115	2.80592	2.4625	3.03487	3.55519		0.994603	n.s.	1.23244	n.s.	1.44373	n.s.		1.69498	1.42977	1.42094	1.3668	1.44241	1.21452		0.517519	0.518321	0.510027	0.564957	0.480938	0.36297		10	11	35	14	21	4		-0.779145	0.634729	-0.400402	-0.985666	0.0308546	-1.18702	-1.54191		0.446169	0.532417	0.692986	0.360597	0.975751
ABprapp	82	6.56909	5.80427	4.63028	5.30809	4.17841	3.23447		0.797738	n.s.	0.787179	n.s.	0.609347	n.s.		1.18204	2.2183	1.72298	1.55137	1.71649	2.00737		0.184439	0.390871	0.374769	0.297485	0.415691	0.659408		10	11	35	14	21	4		-0.998195	0.630522	2.1209	2.13062	1.6093	2.02175	1.90949		0.333477	0.536638	0.0494565	0.0778686	0.129856
ABprpaa	83	3.46361	2.50444	3.99509	2.94533	4.69493	5.1261		1.59521	*	1.59403	*	1.74042	n.s.		1.85984	1.10278	1.74032	1.05477	1.772	3.88656		0.550389	0.45034	0.438725	0.36451	0.381922	0.805578		10	11	35	14	21	4		-1.41971	-1.01142	-4.29525	-1.32977	-3.35771	-3.65621	-1.11059		0.177048	0.323254	0.000179523	0.271001	0.00235582
ABprpap	84	4.54198	3.08868	3.246	3.43258	3.12162	4.46962		1.05093	n.s.	0.909408	n.s.	1.30211	n.s.		1.72606	1.38588	1.52249	1.61211	1.48683	2.97508		0.389524	0.458892	0.472385	0.478034	0.481972	0.707224		10	11	35	14	21	4		-2.11416	-0.572977	-0.0622573	-0.893741	-0.320576	0.576547	-0.669623		0.0493159	0.572276	0.950927	0.428858	0.752173
ABprppa	85	2.84786	2.06129	3.81509	2.78948	4.49882	4.89841		1.85082	*	1.61278	n.s.	1.75603	n.s.		0.963595	1.11716	2.13448	1.921	2.02962	2.99247		0.346817	0.554287	0.56348	0.700956	0.456517	0.649089		10	11	35	14	21	4		-1.73171	-1.18591	-4.38063	-1.84987	-3.55315	-2.52096	-1.33318		0.0995656	0.248639	0.000134088	0.152785	0.00116435
ABprppp	86	3.69234	3.07994	3.93236	4.32011	3.67387	3.79578		1.27676	n.s.	0.850411	n.s.	0.878631	n.s.		1.14919	1.13459	1.33749	1.14296	1.42005	2.94467		0.319017	0.376754	0.342553	0.269292	0.39113	0.824259		10	11	35	14	21	4		-1.22702	-2.70408	-1.28672	-0.473578	-2.07883	1.48517	0.348694		0.234991	0.0130565	0.210074	0.665142	0.051027
Eal	87	4.50814	7.18295	4.30505	4.38405	4.24975	5.22247		0.599343	*	0.969367	n.s.	1.19124	n.s.		1.31129	2.18623	2.26374	1.63657	2.65709	2.42039		0.298143	0.312818	0.5297	0.379968	0.633048	0.492422		10	9	34	14	20	4		3.19015	3.2931	3.11959	1.38778	3.48539	0.182028	-0.651551		0.00720969	0.00546874	0.00572441	0.220639	0.00405419
Ear	88	4.34753	6.68773	5.33001	6.15127	4.75512	4.63875		0.796983	n.s.	0.77303	n.s.	0.754111	n.s.		1.52005	2.08938	2.39942	2.7154	2.02721	1.84608		0.358376	0.321098	0.453482	0.449319	0.43165	0.422843		10	9	34	14	20	4		2.76542	0.533338	2.32569	1.772	1.67839	1.63168	1.28817		0.0147825	0.599628	0.034391	0.122355	0.115221
Epl	89	4.02585	4.90004	4.10605	3.68821	4.41393	3.91431		0.837962	n.s.	1.19677	n.s.	1.0613	n.s.		1.11789	1.24077	2.10528	2.45845	1.81067	1.62253		0.285391	0.260249	0.516611	0.678474	0.415615	0.440419		9	9	33	14	19	4		1.57032	1.56086	0.829284	1.0825	1.43683	-0.933579	-0.216572		0.136112	0.134093	0.415761	0.332001	0.164779
Epr	90	2.47451	3.15295	4.90334	4.25696	5.3558	4.98967		1.55516	*	1.25813	n.s.	1.17212	n.s.		1.70469	1.42045	1.45841	1.57369	1.21508	1.32042		0.710428	0.463029	0.29962	0.376276	0.229707	0.28117		8	9	34	14	20	4		0.885183	-1.74324	-4.03526	-2.26074	-3.26878	-2.19455	-0.936014		0.391297	0.0978762	0.00131267	0.0626772	0.00619073
Da	91	5.67066	5.96618	6.55374	7.40271	5.95947	5.76987		1.09848	n.s.	0.805039	n.s.	0.779427	n.s.		1.70381	2.31243	3.24432	3.08422	3.29697	4.14427		0.30985	0.399702	0.498673	0.424074	0.560149	0.763151		8	8	34	14	20	4		0.291003	-1.23734	0.00609724	0.0881254	-0.594138	1.30507	0.732192		0.775686	0.231612	0.9952	0.934048	0.561681
Dp	92	4.9309	3.61731	5.01737	4.14323	5.62928	4.43704		1.38705	n.s.	1.35867	n.s.	1.07091	n.s.		1.97587	1.36204	2.10122	2.22642	1.82198	1.83619		0.413235	0.3883	0.421869	0.54696	0.327707	0.439696		8	8	34	14	20	4		-1.54818	-0.687043	-3.18969	-0.790695	-2.32779	-2.06068	-0.268551		0.146658	0.500017	0.00526383	0.466937	0.033393
MSaaa	93	2.2686	2.58512	2.3031	2.21533	2.36454	2.01993		0.890909	n.s.	1.06735	n.s.	0.911794	n.s.		0.874166	0.841168	1.64394	2.10805	1.28206	0.659124		0.394965	0.333524	0.719042	0.968567	0.548978	0.346705		10	10	34	14	20	4		0.825041	0.593518	0.564017	1.33451	0.727567	-0.236041	0.299375		0.420164	0.560163	0.57764	0.222868	0.472484
MSaap	94	3.97752	3.34932	3.91623	4.3793	3.59208	4.5002		1.16926	n.s.	0.820241	n.s.	1.02761	n.s.		1.16976	1.20143	1.83725	2.01331	1.67948	2.26698		0.301445	0.367678	0.472586	0.467943	0.473396	0.535236		10	10	34	14	20	4		-1.18469	-1.56368	-0.454434	-0.962704	-1.14856	1.19971	-0.0963583		0.251556	0.132507	0.653562	0.394356	0.262691
MSapa	95	2.21097	3.48318	3.19819	3.05061	3.30694	3.11966		0.918182	n.s.	1.08403	n.s.	1.02264	n.s.		0.74957	0.933852	1.4207	1.56656	1.33657	2.03234		0.347498	0.275551	0.447585	0.522694	0.409488	0.692176		10	9	33	14	19	4		3.25158	0.829124	0.403344	0.342044	0.71682	-0.493937	-0.0628307		0.00522414	0.416384	0.690607	0.751451	0.482045
MSapp	96	4.54358	4.5103	6.33572	6.21784	6.42257	6.17619		1.40472	*	1.03293	n.s.	0.993301	n.s.		1.53484	0.916053	2.3619	2.17471	2.54618	1.84304		0.346248	0.208744	0.375615	0.355999	0.401658	0.317062		10	9	33	14	19	4		-0.0580524	-2.60081	-2.90122	-1.71601	-3.56431	-0.248453	0.0382325		0.954478	0.0176357	0.00764855	0.167529	0.00108475
MSpaa	97	2.87958	3.63498	2.80314	2.60913	2.93894	4.97616		0.771156	n.s.	1.1264	n.s.	1.90721	n.s.		0.624011	1.82392	1.47445	1.07547	1.71388	2.19027		0.222119	0.514312	0.529868	0.419556	0.590451	0.467662		10	10	34	14	20	4		1.23918	1.59188	1.00514	-1.08358	1.32087	-0.688463	-2.09059		0.240888	0.134632	0.328827	0.330232	0.209914
MSpap	98	3.09491	3.51076	4.70691	4.31599	4.98056	7.82014		1.34071	n.s.	1.15398	n.s.	1.8119	n.s.		1.28767	1.33276	1.78686	1.67685	1.85208	3.91713		0.426463	0.389113	0.382416	0.395459	0.37651	0.532209		10	10	34	14	20	4		0.709606	-1.30888	-2.48748	-2.15103	-2.29547	-1.08908	-1.74407		0.487051	0.204283	0.0201702	0.112824	0.0329222
MSppa	99	3.19644	3.3534	3.38334	3.05704	3.62377	4.51889		1.00893	n.s.	1.18538	n.s.	1.47819	n.s.		1.64468	1.95924	1.41539	1.34548	1.45264	1.71497		0.527398	0.598862	0.421509	0.447985	0.406139	0.403229		10	10	33	14	19	4		0.194043	0.413702	-0.384315	-1.10171	-0.0449012	-1.15594	-1.57217		0.84838	0.68498	0.706376	0.310459	0.964925
MSppp	100	3.13603	4.45176	3.78279	3.39912	4.04531	6.34108		0.849731	n.s.	1.19011	n.s.	1.86551	n.s.		1.42821	1.99927	1.72191	2.07227	1.4368	2.62783		0.466803	0.460325	0.458751	0.621373	0.359851	0.440315		10	10	32	13	19	4		1.69339	1.23199	0.570056	-1.29574	0.953363	-0.975299	-2.05141		0.109416	0.232347	0.577649	0.257929	0.357231
Caaa	101	11.0758	12.659	8.47923	8.62931	8.39095	6.13288		0.669816	***	0.972378	n.s.	0.710704	n.s.		2.53385	0.850368	2.35488	2.51556	2.33013	2.93193		0.236945	0.0705335	0.280295	0.298802	0.28178	0.507946		7	5	27	10	17	4		1.53648	4.57031	6.26573	4.30915	7.06504	0.244271	1.49676		0.164169	0.000622471	5.72021e-06	0.0177068	1.4251e-06
Caap	102	16.6555	19.5362	14.2452	16.0144	13.2926			0.729173	***	0.830039	n.s.				3.26181	0.537911	3.91771	3.69994	3.82726			0.208081	0.029255	0.278456	0.239289	0.293461			4	4	20	7	13			1.74279	2.473	5.7017		5.77369	1.55029			0.174985	0.0455901	6.52912e-05		8.98073e-06
Capa	103				16.3199	15.6053					0.956213	n.s.							5.47005	4.72174						0.351934	0.312027						5	8								0.241288
Capp	104	6.85873	9.73179	10.6927	10.4969	10.8641			1.09874	n.s.	1.03499	n.s.				3.34163	1.09969	3.69631	4.71226	2.86709			0.517659	0.120062	0.351445	0.464954	0.272152			4	4	15	7	8			1.63338	-0.410449	-0.981921		-0.872452	-0.179213			0.184665	0.693631	0.349865		0.395554
Cpaa	105	6.14473	6.03323	4.27643	4.36174	4.22951	2.91178		0.708812	n.s.	0.969685	n.s.	0.667574	n.s.		1.87047	1.57768	2.19827	2.87911	1.80577	1.19121		0.313914	0.269671	0.518189	0.675086	0.432282	0.434668		8	8	31	11	20	4		-0.128882	1.61991	2.61939	3.82524	2.57072	0.138109	1.37728		0.899336	0.124727	0.0195288	0.0051124	0.021389
Cpap	106	8.17275	9.76362	7.9021	8.18004	7.73224	5.04701		0.809341	*	0.945257	n.s.	0.616991	.		1.89792	1.05572	2.51332	2.55508	2.54623	0.539853		0.239482	0.111989	0.320799	0.319454	0.333874	0.11365		8	7	29	11	18	4		2.03777	1.82526	2.81863	9.79063	3.03162	0.458546	3.83806		0.0659196	0.0888262	0.00980493	4.31957e-06	0.00575342
Cppa	107	6.29526	7.11689	4.81345	6.27003	3.8424			0.676342	.	0.612821	n.s.				1.48674	0.960338	2.72501	3.4114	1.75197			0.250929	0.143372	0.575559	0.56675	0.468621			4	4	15	6	9			0.92843	0.574869	4.33107		2.70412	1.6075			0.394755	0.585893	0.0014435		0.0163623
Cppp	108				10.8301	9.14507					0.844415	n.s.							3.18445	3.36893						0.306289	0.37862						6	9								0.980843
ABalaaaa	109	3.68243	3.38727	5.14968	5.40246	4.93302			1.5203	n.s.	0.913106	n.s.				1.47932	1.43152	1.85965	2.43265	1.36619			0.426831	0.449031	0.368065	0.469048	0.286838			4	4	13	6	7			-0.286761	-1.64616	-1.75139		-1.99767	0.41939			0.78395	0.138526	0.129563		0.0891452
ABalaaap	110	4.3937	4.79412	4.43239	5.00152	3.86326			0.924546	n.s.	0.772416	n.s.				2.37239	1.02103	1.62553	1.42185	1.71688			0.573699	0.223625	0.373289	0.294436	0.460285			4	5	14	7	7			0.315035	-0.294097	1.17316		0.573936	1.35096			0.768904	0.774707	0.26844		0.576974
ABalaapa	111	5.22826	8.66668	6.18168	6.44759	5.98225			0.71327	n.s.	0.927828	n.s.				0.566499	1.61957	2.3495	1.70175	2.84202			0.115125	0.198553	0.386861	0.274934	0.489921			4	4	14	6	8			4.00798	2.07982	2.08015		2.42506	0.380926			0.0184455	0.0771361	0.0653356		0.0452707
ABalaapp	112	8.33326	9.40204	6.38752	6.84585	5.98648			0.679376	n.s.	0.874468	n.s.				1.14842	1.94486	2.63642	2.04399	3.15064			0.146425	0.219783	0.419625	0.309236	0.542739			4	4	15	7	8			0.946405	2.05819	2.30991		2.53959	0.633945			0.388536	0.0806474	0.0455648		0.0420843
ABalapaa	113	3.52186	6.37469	6.06514	6.48386	5.64643			0.951442	n.s.	0.870844	n.s.				1.51897	3.59236	2.87896	3.24937	2.644			0.458255	0.598756	0.483149	0.519046	0.484984			4	4	14	7	7			1.46288	-0.0501726	0.354303		0.158411	0.528894			0.216656	0.961661	0.73782		0.881511
ABalapap	114	4.8508	8.11037	6.62519	7.32005	6.01719			0.816879	n.s.	0.822015	n.s.				2.04638	2.01477	2.94182	3.74988	2.08578			0.442958	0.26084	0.451436	0.530571	0.35747			5	5	15	7	8			2.53803	0.470574	1.79775		1.26025	0.815462			0.0348239	0.64856	0.106228		0.235569
ABalappa	115	6.16189	4.57503	4.92366	4.82991	5.0174			1.0762	n.s.	1.03882	n.s.				0.431437	1.21305	1.84036	1.61215	2.17229			0.0743931	0.281718	0.380455	0.345706	0.448413			4	4	14	7	7			-2.46504	-0.296465	-0.433371		-0.44645	-0.183375			0.0735702	0.774403	0.674964		0.667888
ABalappp	116	4.18375	3.59375	3.90679	2.89564	4.69325			1.08711	n.s.	1.6208	n.s.				0.589693	1.11654	1.9548	1.44341	2.00294			0.147996	0.326225	0.508176	0.516282	0.438625			5	5	16	7	9			-1.04482	0.943933	-1.31879		-0.448051	-2.08491			0.335916	0.367732	0.211923		0.661894
ABalpaaa	117	2.55458	6.41265	4.37978	4.60115	4.2076			0.682991	n.s.	0.914468	n.s.				1.68602	1.59104	1.83852	1.57199	2.09958			0.701249	0.263617	0.426334	0.353854	0.512857			4	4	16	7	9			3.32849	1.82442	2.0811		2.21262	0.428674			0.0159154	0.115549	0.0723038		0.0755679
ABalpaap	118	2.97898	2.14402	3.85062	3.50554	4.12668			1.79598	n.s.	1.17719	n.s.				1.71208	1.14441	1.38425	1.55808	1.24127			0.595247	0.560455	0.364481	0.458351	0.30831			7	5	18	8	10			-1.01203	-1.81072	-3.07396		-2.81177	-0.918304			0.335407	0.0987261	0.0137225		0.0239289
ABalpapa	119	4.45921	6.6957	4.78686	4.34594	5.17878			0.714915	n.s.	1.19164	n.s.				2.19997	1.38634	1.7578	1.62687	1.86993			0.51391	0.217401	0.372614	0.386041	0.371105			6	5	17	8	9			2.0493	2.77845	1.72544		2.53692	-0.981955			0.072562	0.0199844	0.113157		0.0341543
ABalpapp	120	4.16069	4.99759	4.47702	3.8993	4.86217			0.895836	n.s.	1.24693	n.s.				1.39221	1.48369	1.69741	1.5363	1.75218			0.345068	0.311725	0.383878	0.406306	0.367877			8	5	20	8	12			1.01298	1.28081	0.16231		0.681002	-1.2973			0.340037	0.232703	0.874684		0.518093
ABalppaa	121	3.32264	6.33535	5.30834	6.27775	4.4601			0.837891	n.s.	0.710462	n.s.				1.11851	1.7972	2.68767	2.03372	3.02323			0.357672	0.301408	0.514749	0.335527	0.69902			4	4	15	7	8			2.84644	0.0487155	1.34291		0.904571	1.3806			0.0358037	0.962489	0.210774		0.395333
ABalppap	122	3.15617	6.39962	5.70154	6.33664	5.20757			0.890919	n.s.	0.821819	n.s.				0.848748	0.701163	2.58505	3.40776	1.78677			0.285724	0.115041	0.460479	0.556993	0.352642			4	5	16	7	9			6.1469	0.047507	1.771		0.971826	0.795653			0.000927982	0.963495	0.103471		0.343377
ABalpppa	123	8.37957	8.03729	6.96479	6.82149	7.09218			0.86656	n.s.	1.03968	n.s.				1.23706	1.31835	1.76599	2.00567	1.6367			0.15501	0.172231	0.257289	0.303211	0.237186			5	5	17	8	9			-0.423349	1.31837	1.17657		1.47171	-0.302545			0.683236	0.214401	0.26639		0.176213
ABalpppp	124	7.16629	7.02977	5.88726	5.10785	6.40687			0.837476	n.s.	1.25432	n.s.				0.875386	2.15153	1.78332	1.86481	1.59492			0.127243	0.321362	0.306697	0.376497	0.254126			6	5	20	8	12			-0.133008	1.64773	0.583963		1.09693	-1.61538			0.899275	0.139638	0.580768		0.318693
ABaraaaa	125	6.5131	2.28828	3.95054	4.4795	3.42157			1.72642	n.s.	0.763828	n.s.				0.972418	0.813202	1.71372	2.22927	0.860601			0.158633	0.377589	0.441542	0.515435	0.260505			4	4	14	7	7			-6.66568	-2.34215	-2.17648		-2.7141	1.17132			0.000626355	0.0464087	0.0677225		0.0197713
ABaraaap	126	4.1124	2.88895	3.47221	3.93849	3.05773			1.20189	n.s.	0.776373	n.s.				2.56548	0.892947	1.46811	2.05042	0.470467			0.649835	0.324545	0.429036	0.536879	0.158135			6	5	17	8	9			-1.09149	-1.2681	-0.393416		-1.09014	1.18748			0.314492	0.232828	0.709438		0.298689
ABaraapa	127	7.09044	3.50622	4.18614	5.14043	3.42271			1.19392	n.s.	0.665841	n.s.				1.60538	0.666041	1.88641	1.9704	1.49831			0.237736	0.201833	0.456891	0.395292	0.4487			5	4	18	8	10			-4.52883	-2.11646	0.144192		-1.22395	2.03884			0.0048003	0.0620618	0.887824		0.239995
ABaraapp	128	5.91144	2.55299	3.56959	4.53634	2.81768			1.3982	n.s.	0.621136	n.s.				2.65719	0.74726	2.22868	2.67256	1.5819			0.468228	0.307335	0.634106	0.610185	0.577015			6	5	16	7	9			-2.95873	-1.86409	-0.424		-1.56472	1.50828			0.0256949	0.103099	0.67914		0.134439
ABarapaa	129	8.45453	2.99637	5.22515	6.5567	3.89361			1.74383	n.s.	0.593836	n.s.				3.57331	1.03591	2.91028	2.46485	2.83218			0.443782	0.363009	0.565677	0.387676	0.750124			5	5	16	8	8			-3.28048	-3.60742	-0.813224		-2.58397	2.00619			0.0242811	0.00471014	0.435891		0.0185401
ABarapap	130	7.19934	2.03428	3.99731	4.67775	3.39246			1.96498	*	0.725234	n.s.				4.86156	0.463132	2.06836	2.29794	1.74964			0.703414	0.239048	0.525049	0.5066	0.530069			6	5	17	8	9			-2.58836	-3.15289	-2.19452		-3.61697	1.28516			0.0479455	0.0137998	0.053374		0.00175974
ABarappa	131	7.2274	6.17723	5.67565	4.94898	6.40233			0.918802	n.s.	1.29367	n.s.				2.4722	0.977946	2.01214	1.68233	2.17021			0.359163	0.168209	0.360852	0.352075	0.351078			5	4	14	7	7			-0.868697	1.53124	-0.235718		0.690086	-1.40034			0.421675	0.160291	0.819046		0.504504
ABarappp	132	5.55908	6.82865	7.40787	6.57135	8.05849			1.08482	n.s.	1.22631	n.s.				0.636171	1.65687	2.46464	2.70954	2.18971			0.12016	0.254767	0.337904	0.427053	0.279275			5	5	16	7	9			1.59952	0.203556	-1.18243		-0.601037	-1.18253			0.168856	0.842836	0.26298		0.560997
ABarpaaa	133	5.71277	10.3173	7.77483	9.09553	6.7843			0.753572	n.s.	0.745894	n.s.				4.23583	2.6725	4.07888	4.67985	3.55498			0.787808	0.27522	0.533995	0.535961	0.540375			4	4	14	6	8			1.83871	0.524035	1.92589		1.47431	1.01064			0.124644	0.614586	0.090384		0.180829
ABarpaap	134	6.01329	8.35514	6.56213	6.91195	6.30771			0.7854	n.s.	0.91258	n.s.				2.8405	2.00825	2.4177	2.75424	2.24551			0.489242	0.248946	0.373281	0.410927	0.364086			7	7	19	8	11			1.7811	1.1689	2.01296		1.90725	0.509476			0.103004	0.26401	0.0637332		0.079014
ABarpapa	135	6.70263	8.05084	6.51507	7.31812	5.5973			0.809241	n.s.	0.764855	n.s.				1.29241	1.70987	2.60147	2.6565	2.3907			0.202462	0.225657	0.405955	0.374347	0.442371			5	4	15	8	7			1.30644	0.576923	1.97239		1.41255	1.32035			0.243312	0.578141	0.0828157		0.199222
ABarpapp	136	6.66527	7.33573	5.64296	6.20554	5.1429			0.769244	n.s.	0.828759	n.s.				0.699564	1.06317	2.142	2.65526	1.55222			0.110204	0.152176	0.38517	0.441257	0.310201			5	5	17	8	9			1.17798	1.074	3.12063		2.40367	0.991347			0.277738	0.308274	0.00952738		0.0304379
ABarppaa	137	5.0076	12.6989	9.36661	10.168	8.66536			0.737593	n.s.	0.852215	n.s.				3.14897	3.07118	3.58451	3.34464	3.86065			0.668141	0.253939	0.389069	0.340684	0.45945			4	5	15	7	8			3.68116	1.35579	2.08304		2.01199	0.807713			0.008982	0.207401	0.0634726		0.079092
ABarppap	138	7.50086	15.9349	12.0396	12.7066	11.456			0.755549	*	0.90158	n.s.				2.6563	0.990652	3.92672	2.90755	4.77053			0.376267	0.0660543	0.331586	0.236995	0.429436			4	4	15	7	8			5.94988	2.67817	2.54792		3.45205	0.62123			0.00463254	0.0279335	0.0338893		0.00305123
ABarpppa	139	3.91901	7.76221	4.55443	4.92735	4.18152			0.586744	.	0.848635	n.s.				1.15425	1.71205	2.0094	1.87069	2.19882			0.312932	0.23159	0.44809	0.39152	0.542276			4	5	16	8	8			4.00835	2.80191	3.28162		3.50294	0.730715			0.00532631	0.0201185	0.00799028		0.00837381
ABarpppp	140	5.19771	7.64285	6.87679	6.81503	6.93083			0.899768	n.s.	1.01699	n.s.				0.543915	1.80391	2.06001	1.71054	2.4438			0.111186	0.250777	0.304552	0.259959	0.363617			4	4	15	7	8			2.59552	0.745962	0.570063		0.731596	-0.107313			0.0681783	0.483554	0.584084		0.495406
ABplaaaa	141	6.48798	5.02158	5.80184	6.61611	4.98758			1.15538	n.s.	0.753854	n.s.				1.50307	1.18943	2.43901	2.40402	2.33506			0.243253	0.248707	0.426953	0.374714	0.482806			5	5	16	8	8			-1.71069	-1.59027	0.0346221		-0.964283	1.37441			0.127496	0.140893	0.973014		0.350536
ABplaaap	142	8.50034	7.49677	6.49862	7.30741	5.68983			0.866856	n.s.	0.778637	n.s.				1.6106	1.23059	2.59922	2.62936	2.4634			0.198948	0.172357	0.406215	0.371065	0.446479			5	5	16	8	8			-1.10713	0.175279	1.75389		1.17217	1.26983			0.302552	0.864192	0.107961		0.25929
ABplaapa	143	5.02964	4.39346	4.91579	4.88533	4.94624			1.11889	n.s.	1.01247	n.s.				1.6376	1.14544	1.7152	1.7845	1.76564			0.335764	0.271577	0.354367	0.376692	0.368122			8	6	16	8	8			-0.854822	-0.626343	-0.708728		-0.823274	-0.0686263			0.409424	0.543004	0.492212		0.42444
ABplaapp	144	4.56105	5.55345	5.19215	5.38664	5.06249			0.934941	n.s.	0.939824	n.s.				1.77737	1.15135	2.10091	2.56353	1.84283			0.401862	0.214725	0.40969	0.490778	0.3716			8	7	20	8	12			1.29833	0.165918	0.714342		0.564218	0.308438			0.21841	0.871535	0.484806		0.578977
ABplapaa	145	9.62858	12.3753	10.0756	10.1938	9.95743			0.814173	n.s.	0.976808	n.s.				4.11174	1.81275	3.30318	3.88753	2.86982			0.448386	0.153805	0.332961	0.393278	0.297215			5	5	16	8	8			1.3668	1.36707	1.86173		1.98725	0.138387			0.224928	0.20017	0.0896315		0.0685473
ABplapap	146	10.7886	12.0662	10.4577	11.6754	9.24008			0.866696	n.s.	0.791416	n.s.				2.10782	2.38041	3.54463	3.52992	3.32783			0.202352	0.207143	0.344245	0.311787	0.371406			7	5	16	8	8			0.960838	0.238253	1.78114		1.16125	1.41984			0.364597	0.816126	0.103375		0.272088
ABplappa	147	8.63472	10.4126	9.27205	9.26533	9.27877			0.890461	n.s.	1.00145	n.s.				3.14724	2.02876	2.82548	2.8233	3.0226			0.382711	0.202955	0.309493	0.314238	0.335934			5	6	16	8	8			1.08868	0.884549	0.838644		1.04781	-0.00918858			0.314359	0.393784	0.418175		0.314286
ABplappp	148	11.6242	13.5921	13.3413	13.9357	12.8212			0.981549	n.s.	0.920024	n.s.				2.25023	2.18699	3.69323	2.94321	4.38092			0.205681	0.170958	0.281441	0.218742	0.352371			4	4	15	7	8			1.25427	-0.220286	0.406592		0.172852	0.584442			0.25643	0.831106	0.692916		0.866922
ABplpaaa	149	4.76234	7.85024	5.73679	5.92882	5.54476			0.730779	n.s.	0.935222	n.s.				2.12698	1.52958	2.87023	3.0894	2.83278			0.47454	0.204587	0.508137	0.537365	0.526859			4	5	16	8	8			2.44201	1.49088	1.90088		2.13186	0.259158			0.055592	0.164898	0.0840649		0.0521527
ABplpaap	150	4.70926	7.26811	4.58277	4.76806	4.43865			0.630531	n.s.	0.930914	n.s.				1.088	1.8156	2.00746	2.44211	1.74059			0.245474	0.262294	0.444889	0.530474	0.403037			4	5	16	7	9			2.61815	2.03366	2.83526		2.81323	0.302143			0.0362728	0.0695332	0.0217658		0.0247398
ABplpapa	151	6.97873	9.67176	7.94523	7.77504	8.0776			0.821487	n.s.	1.03891	n.s.				0.471856	0.447316	2.86089	2.73993	3.1098			0.0718393	0.0485622	0.365703	0.364986	0.395686			4	5	16	7	9			8.70621	1.79828	1.51002		2.32476	-0.206484			8.95567e-05	0.118849	0.16694		0.0326888
ABplpapp	152	5.7339	7.1717	5.9488	5.5434	6.24364			0.829482	n.s.	1.12632	n.s.				1.17049	1.35949	1.84617	2.27268	1.51406			0.21264	0.199041	0.314427	0.422792	0.248007			6	5	19	8	11			1.85933	1.61601	1.22067		1.65042	-0.757725			0.0999421	0.134386	0.254339		0.135726
ABplppaa	153	4.38847	10.0001	8.79548	7.46322	9.79467			0.879537	n.s.	1.31239	n.s.				4.16163	2.36852	3.16156	4.21856	1.78578			0.995724	0.251652	0.365871	0.588798	0.188019			5	4	14	6	8			2.54385	1.21377	0.153091		0.828054	-1.27103			0.0410374	0.259863	0.884575		0.437217
ABplppap	154	3.15496	7.25214	7.3552	6.99223	7.6728			1.01421	n.s.	1.09733	n.s.				2.66324	1.77657	2.69654	3.73676	1.52548			0.896905	0.260283	0.372728	0.553502	0.205029			4	4	15	7	8			2.55961	0.155777	-0.404798		-0.0913171	-0.450165			0.0486172	0.879685	0.701421		0.929718
ABplpppa	155	3.24629	7.1734	6.27885	6.13588	6.39005			0.875297	n.s.	1.04142	n.s.				2.06724	2.37224	2.53772	3.59267	1.53712			0.676601	0.351368	0.410484	0.60643	0.247231			4	4	16	7	9			2.49611	0.575443	0.60628		0.665026	-0.175127			0.0475102	0.579706	0.575792		0.536152
ABplpppa.1	156	3.24629	7.1734	6.27885	6.13588	6.39005			0.875297	n.s.	1.04142	n.s.				2.06724	2.37224	2.53772	3.59267	1.53712			0.676601	0.351368	0.410484	0.60643	0.247231			4	4	16	7	9			2.49611	0.575443	0.60628		0.665026	-0.175127			0.0475102	0.579706	0.575792		0.536152
ABplpppp	157	3.45639	6.37052	7.08672	7.56466	6.71498			1.11242	n.s.	0.887678	n.s.				2.41585	2.27313	2.77219	3.87443	1.67204			0.742635	0.379122	0.397293	0.530467	0.255917			4	4	16	7	9			1.75701	-0.644191	-0.272116		-0.538009	0.542278			0.129612	0.53565	0.797523		0.61165
ABpraaaa	158	10.2516	7.844	6.74082	6.54732	6.93431			0.859359	n.s.	1.05911	n.s.				1.40026	2.13928	2.26016	2.30349	2.38214			0.145126	0.289773	0.341282	0.364387	0.355798			4	4	14	7	7			-1.8833	0.940184	0.650644		0.898055	-0.308987			0.116443	0.379312	0.53604		0.409555
ABpraaap	159	7.38027	4.73206	4.6441	4.62377	4.66733			0.981412	n.s.	1.00942	n.s.				1.67965	2.65765	2.13629	2.24417	2.18444			0.238965	0.596729	0.467667	0.500523	0.484744			5	4	15	8	7			-1.7349	0.0699666	0.0413748		0.0611354	-0.0380388			0.14507	0.946815	0.968494		0.954118
ABpraapa	160	4.75934	9.51507	6.18641	6.34825	6.0448			0.65017	n.s.	0.952199	n.s.				3.46397	2.93677	2.62825	2.99388	2.46646			0.764217	0.327934	0.431923	0.488451	0.420781			5	4	15	7	8			2.22806	1.70827	2.03201		2.05776	0.212411			0.0614525	0.13478	0.0955633		0.102721
ABpraapp	161	4.21522	5.87409	4.38308	4.01137	4.68045			0.746171	n.s.	1.16679	n.s.				2.19149	1.44706	2.03929	2.13054	2.02578			0.538466	0.258663	0.471727	0.547724	0.443638			7	5	18	8	10			1.57817	1.87571	1.31085		1.84961	-0.676634			0.145662	0.0879006	0.216639		0.0974587
ABprapaa	162	3.4752	7.93452	5.49526	5.81408	5.24728			0.692576	n.s.	0.902512	n.s.				2.90568	2.04776	2.59958	2.98967	2.41023			0.888377	0.270986	0.48045	0.532576	0.472088			4	5	16	7	9			2.59658	1.45786	2.20582		2.17218	0.408805			0.0463563	0.175559	0.0528284		0.0597546
ABprapap	163	4.70979	5.42044	4.29893	4.77422	3.82364			0.793095	n.s.	0.800892	n.s.				1.03681	2.04553	1.42853	0.889895	1.75062			0.229312	0.396243	0.337492	0.192221	0.47215			6	5	16	8	8			0.70503	0.66801	1.44572		1.14204	1.3691			0.508618	0.533933	0.188242		0.302574
ABprappa	164	5.14338	3.5016	3.103	3.06183	3.14417			0.886166	n.s.	1.02689	n.s.				1.89309	2.03392	1.59701	1.29548	1.96055			0.386466	0.617157	0.523858	0.438219	0.64582			5	4	14	7	7			-1.24073	0.389626	0.28406		0.361413	-0.0927044			0.258767	0.714817	0.785668		0.735564
ABprappp	165	5.27529	3.10996	5.2113	5.20863	5.21359			1.67568	n.s.	1.00095	n.s.				1.01121	1.62455	1.57083	1.77353	1.52113			0.203669	0.55502	0.307224	0.354685	0.302182			4	4	13	6	7			-2.26314	-1.9287	-2.11387		-2.27976	-0.00536539			0.0728391	0.0950629	0.0789094		0.0729289
ABprpaaa	166	9.94358	10.9204	7.26289	8.34743	6.02342			0.665077	*	0.72159	n.s.				1.62323	1.47317	2.63504	2.34428	2.53558			0.171406	0.143333	0.368856	0.289615	0.435988			5	4	15	8	7			0.944501	2.3204	4.05134		3.64754	1.83419			0.377129	0.0450621	0.00291801		0.00542622
ABprpaap	167	8.0076	8.10404	6.6524	7.24412	6.13465			0.820875	n.s.	0.846846	n.s.				1.90395	1.92906	1.76505	1.83356	1.64093			0.249656	0.252915	0.269747	0.262149	0.275845			5	4	15	7	8			0.0749561	0.724028	1.74968		1.36076	1.22756			0.942495	0.495926	0.137594		0.238553
ABprpapa	168	11.5686	11.384	9.22345	9.21375	9.23316			0.810209	n.s.	1.00211	n.s.				1.7121	1.39886	3.63778	4.63696	2.61834			0.155396	0.129023	0.400568	0.518992	0.292442			5	5	16	8	8			-0.186624	1.23684	1.92511		1.95736	-0.010307			0.856782	0.247933	0.0807401		0.066269
ABprpapp	169	8.32641	8.10748	6.42561	7.59508	5.60698			0.792554	n.s.	0.738239	n.s.				1.06396	1.06627	2.57553	2.88656	2.10464			0.13417	0.138093	0.406718	0.39363	0.384744			5	5	17	7	10			-0.325006	0.430342	3.05408		2.14015	1.55564			0.753513	0.678209	0.00927028		0.0471416
ABprppaa	170	13.3125	12.818	8.39212	9.31155	7.60404			0.654715	*	0.816625	n.s.				0.619044	1.50011	2.87699	2.59222	3.06342			0.0494074	0.124346	0.349413	0.289987	0.417255			4	4	13	6	7			-0.609413	2.70325	3.77937		4.04145	1.08854			0.575223	0.0271106	0.00440368		0.00220725
ABprppap	171	8.94773	9.56007	7.43169	7.82242	7.04096			0.777368	n.s.	0.900101	n.s.				0.848367	3.19528	2.15835	1.75973	2.57691			0.100739	0.355122	0.295611	0.232994	0.37906			4	4	14	7	7			0.370444	1.0041	1.34631		1.25303	0.662577			0.732823	0.37125	0.233117		0.281445
ABprpppa	172	6.44007	8.16362	6.29125	7.00758	5.75401			0.770645	n.s.	0.821112	n.s.				3.34619	2.43151	2.21827	2.02482	2.33244			0.545569	0.316462	0.358892	0.300987	0.418026			5	4	14	6	8			0.893923	0.786334	1.64026		1.38427	1.07361			0.401164	0.463173	0.153211		0.230481
ABprpppp	173	5.90623	8.38503	5.7542	6.55816	5.05073			0.686247	n.s.	0.770144	n.s.				1.95383	1.5925	2.27403	2.09429	2.31755			0.347349	0.201792	0.401781	0.330746	0.473193			5	4	15	7	8			2.09683	1.62712	2.91832		2.65922	1.32314			0.0743194	0.142513	0.0179309		0.0337347
MSaaaa	174	4.8386	7.48752	5.84765	5.29365	6.33239			0.780987	n.s.	1.19622	n.s.				1.42088	1.08889	2.04488	1.73262	2.28352			0.312009	0.154517	0.355521	0.33899	0.371879			4	4	15	7	8			2.95946	2.57608	1.18623		2.16224	-0.999222			0.0273621	0.0304811	0.262969		0.0573063
MSaaap	175	4.66882	6.94955	5.46223	5.57947	5.34499			0.785983	n.s.	0.957975	n.s.				0.931221	0.8956	1.53896	1.49132	1.6957			0.211922	0.136926	0.286777	0.276833	0.328582			4	4	14	7	7			3.53054	1.90318	2.05225		2.44615	0.274717			0.0123908	0.0898535	0.0703612		0.0376875
MSaapa	176	4.72161	3.36467	3.97135	4.52959	3.48289			1.18031	n.s.	0.768919	n.s.				1.65056	1.59672	1.99636	2.1142	1.88555			0.371425	0.504214	0.51107	0.483424	0.558294			4	4	15	7	8			-1.18176	-1.0313	-0.113665		-0.63841	1.00581			0.282059	0.332551	0.912629		0.547544
MSaapp	177				5.87036	4.78614					0.815306	n.s.							2.36407	1.86448						0.422848	0.40579						5	6								0.832257
MSapaa	178				6.09252	6.88763					1.13051	n.s.							1.12555	2.64189						0.193981	0.397269						5	7								-0.711039
MSapap	179				5.94606	6.22055					1.04616	n.s.							2.22921	2.44664						0.39365	0.407363						5	7								-0.201858
MSappa	180				5.96675	5.96091					0.999021	n.s.							1.64799	2.82262						0.290006	0.490433						5	7								0.00450475
MSappp	181				7.16475	7.38215					1.03034	n.s.							1.05425	3.69689						0.156341	0.518673						4	7								-0.145577
MSpaaa	182	5.57492	4.02776	5.67005	5.95641	5.41949			1.40774	n.s.	0.909859	n.s.				1.25002	1.11333	2.20543	2.41976	2.13432			0.238236	0.293689	0.395444	0.420753	0.40613			4	4	15	7	8			-1.84853	-1.80134	-1.48418		-2.06233	0.45283			0.114674	0.105763	0.168975		0.0656488
MSpaap	183				4.32363	4.1281					0.954775	n.s.							1.79168	1.58435						0.431659	0.397504						6	7								0.206846
MSpapa	184	4.70768	3.37032	3.48856	3.52582	3.45595			1.03508	n.s.	0.980182	n.s.				1.21741	1.49823	1.84069	1.74945	2.03724			0.274764	0.472319	0.536431	0.513902	0.607909			4	4	15	7	8			-1.38552	-0.155633	-0.0824018		-0.133281	0.0714641			0.217166	0.880548	0.936319		0.898549
MSpapp	185	4.20111	5.19704	4.93569					0.949711	n.s.						1.88532	1.74623	2.36788					0.476815	0.357004	0.49174					4	4	10					0.775109		0.018565		0.22722				0.467879		0.985626		0.826203
MSppaa	186				10.8029	9.34737					0.865264	n.s.							2.32314	3.08332						0.224008	0.341641						6	7								0.968723
MSppap	187				9.55781	7.82464					0.818665	n.s.							2.67997	2.65909						0.292079	0.351973						6	7								1.1666
MSpppa	188				9.769	8.07883					0.826987	n.s.							2.39571	2.68371						0.257498	0.344054						5	7								1.14557
MSpppp	189				10.911	10.1079					0.926394	n.s.							2.12723	4.85254						0.204711	0.497221						5	7								0.388701
Eala	190
Ealp	191
Eara	192
Earp	193
Epla	194
Eplp	195
Epra	196
Eprp	197
Z2	198				6.30824	4.63878					0.735352	n.s.							2.39517	3.97578						0.40342	0.899928						4	5								0.778767
Z3	199
Daa	200
Dap	201
Dpa	202
[truncated: 13 more columns]

## Sheet: Total trajectory length
	Order	WT.mean	C.mean	EQ.mean	EA.mean	ED.mean	INV.mean	EQ.over.C	EQ.C.sign	ED.over.EA	ED.EA.sign	INV.over.EA	INV.EA.sign	WT.sd	C.sd	EQ.sd	EA.sd	ED.sd	INV.sd	WT.vc	C.vc	EQ.vc	EA.vc	ED.vc	INV.vc	WT.n	C.n	EQ.n	EA.n	ED.n	INV.n	C.vs.WT.t.stat	C.vs.EA.t.stat	C.vs.ED.t.stat	C.vs.INV.t.stat	C.vs.EQ.t.stat	EA.vs.ED.t.stat	EA.vs.INV.t.stat	C.vs.WT.p.val	C.vs.EA.p.val	C.vs.ED.p.val	C.vs.INV.p.val	C.vs.EQ.p.val	EA.vs.ED.p.val	EA.vs.INV.p.val	C.vs.WT.p.adj	C.vs.EA.p.adj	C.vs.ED.p.adj	C.vs.INV.p.adj
AB	1
P1	2
ABa	3		18.8149	23.426	24.0827	22.6598		1.24508	n.s.	0.940919	n.s.				3.36487	3.7978	3.89294	3.88866			0.185228	0.165237	0.167422	0.178761			7	13	7	6			-2.70855	-1.89019		-2.7923	0.657331			0.0193117	0.0879362		0.0145516	0.524856			0.420029	0.617135
ABp	4		22.9698	26.2859	27.9228	24.3762		1.14437	n.s.	0.872987	n.s.				2.68783	4.37153	3.11808	5.10591			0.121195	0.169505	0.115656	0.21819			7	13	7	6			-3.18326	-0.606523		-2.09643	1.48108			0.0080699	0.562515		0.0508591	0.176748			0.280833	0.902015
EMS	5		18.5073	18.6967	18.185	19.2937		1.01023	n.s.	1.06097	n.s.				2.6753	2.34915	2.15495	2.6225			0.149716	0.128061	0.122734	0.141589			7	13	7	6			0.248258	-0.533974		-0.157427	-0.824168			0.80832	0.604213		0.877745	0.429559			0.921638	0.9042
P2	6		25.1013	24.1587	24.6174	23.6237		0.962449	n.s.	0.959634	n.s.				4.83573	2.67049	2.21668	3.25287			0.199529	0.112665	0.0932612	0.143433			7	13	7	6			0.240692	0.654047		0.477953	0.63286			0.815555	0.527151		0.645433	0.543222			0.921638	0.902015
ABal	7	20.176	18.7034	21.0126	22.1178	20.2232	19.5724	1.12346	n.s.	0.91434	n.s.	0.884919	n.s.	3.39827	3.37649	3.75505	4.69863	2.73101	3.01055	0.172642	0.183035	0.179636	0.215093	0.136249	0.15931	10	18	48	20	28	7	-1.10116	-2.59044	-1.60214	-0.625795	-2.39815	1.61854	1.64348	0.284862	0.0139605	0.119311	0.542916	0.0221482	0.116709	0.118923	0.386598	0.347019	0.682494	0.786838
ABar	8	19.7595	19.3268	19.9882	20.4596	19.6514	20.2713	1.03422	n.s.	0.960496	n.s.	0.990792	n.s.	2.68134	3.30682	3.39123	3.44102	3.37709	4.14767	0.139091	0.173477	0.170546	0.170288	0.173384	0.211916	10	18	48	20	28	7	-0.375659	-1.03433	-0.322219	-0.539456	-0.718575	0.808499	0.107874	0.710731	0.307913	0.749101	0.60247	0.477734	0.423515	0.916443	0.754876	0.754604	0.943113	0.786838
ABpl	9	18.68	22.5179	20.5747	20.785	20.4244	19.5791	0.913703	n.s.	0.982652	n.s.	0.941982	n.s.	2.40413	2.71222	4.02085	3.7039	4.29335	3.89855	0.131918	0.12212	0.196445	0.180428	0.212083	0.206229	10	18	48	20	28	7	3.86374	1.65631	2.02668	1.82965	2.25061	0.31099	0.713423	0.000916318	0.106692	0.0487828	0.103061	0.0292974	0.757268	0.491783	0.00870502	0.577808	0.557256	0.476043
ABpr	10	21.5339	21.079	20.1306	20.2577	20.0398	20.1092	0.955008	n.s.	0.989243	n.s.	0.992667	n.s.	3.59214	4.65329	3.52219	3.88209	3.31204	4.16815	0.170984	0.223821	0.175878	0.19403	0.166748	0.214679	10	18	48	20	28	7	-0.288095	0.587153	0.822903	0.505224	0.784513	0.203614	0.0825876	0.775853	0.561063	0.417515	0.622395	0.440206	0.839774	0.935824	0.813931	0.903935	0.849595	0.786838
MS	11	19.8483	21.0189	20.8521	21.5153	20.3785	20.7196	0.992066	n.s.	0.947163	n.s.	0.963017	n.s.	2.65515	2.83379	3.30675	2.85205	3.57097	2.86737	0.137116	0.136804	0.159407	0.134216	0.176797	0.143332	10	17	48	20	28	7	1.07888	-0.529407	0.664897	0.23325	0.199304	1.22434	0.632778	0.293457	0.599951	0.509951	0.819804	0.843264	0.227146	0.540442	0.39204	0.921638	0.902015	0.903648
E	12	20.5976	21.2764	19.7565	20.2419	19.4097	20.0088	0.928563	n.s.	0.958885	n.s.	0.988481	n.s.	2.47196	2.65313	3.13068	3.19996	3.09132	2.29088	0.123012	0.126532	0.159289	0.160062	0.160689	0.118583	10	17	48	20	28	7	0.67044	1.07496	2.14781	1.17504	1.93303	0.900956	0.207588	0.510197	0.28975	0.0381748	0.261094	0.0618661	0.372978	0.838378	0.589484	0.754604	0.557256	0.730572
C	13	20.5376	20.6478	20.9721	21.8768	20.3259	22.4269	1.01571	n.s.	0.929106	n.s.	1.02514	n.s.	2.38104	2.29081	2.94867	2.70478	2.99125	4.55547	0.118834	0.112579	0.141332	0.125183	0.148479	0.21038	10	17	48	20	28	7	0.117781	-1.49646	0.406149	-0.983333	-0.463357	1.87342	-0.301419	0.907517	0.143498	0.686769	0.356968	0.645893	0.0677559	0.771244	0.918915	0.577808	0.936171	0.769464
P3	14	26.4803	26.7153	27.9816	29.6411	26.8555	26.3401	1.0474	n.s.	0.906023	n.s.	0.888632	n.s.	3.91675	2.2405	4.36286	3.69892	4.47828	5.1216	0.15161	0.0851765	0.156748	0.126432	0.168243	0.201386	10	16	47	19	28	7	0.172852	-2.87758	-0.138232	0.186185	-1.49375	2.32426	1.56181	0.865484	0.00728797	0.890726	0.857561	0.141401	0.0248857	0.155062	0.896956	0.280833	0.962264	0.934645
ABala	15	14.2202	19.1562	19.2367	19.2936	19.1916	20.1197	1.0042	n.s.	0.994713	n.s.	1.04282	n.s.	1.26961	2.03176	3.61204	3.64161	3.66625	4.00585	0.0915143	0.10783	0.18886	0.191231	0.193024	0.207396	10	15	43	19	24	6	7.47189	-0.139311	-0.0387506	-0.561037	-0.105816	0.0909527	-0.449859	1.37377e-07	0.890162	0.9693	0.594897	0.916209	0.927997	0.665047	2.34914e-05	0.950234	0.997258	0.786838
ABalp	16	19.6269	18.1428	18.056	17.827	18.2373	15.7073	0.995219	n.s.	1.02301	n.s.	0.881092	n.s.	2.82541	3.67719	3.03638	3.27445	2.89258	3.26404	0.147555	0.205847	0.169142	0.186096	0.16026	0.216463	10	16	43	19	24	6	-1.15767	0.265953	-0.0865235	1.50444	0.0842768	-0.429387	1.38574	0.258978	0.79207	0.93169	0.162999	0.933564	0.670182	0.201316	0.362993	0.921638	0.970511	0.577538
ABara	17	14.5727	18.1197	18.9951	19.2131	18.8226	16.9204	1.04832	n.s.	0.979674	n.s.	0.880667	n.s.	2.96895	3.02133	2.29478	2.1519	2.4335	1.77341	0.208827	0.169348	0.121511	0.113475	0.130633	0.109176	10	16	43	19	24	6	2.94359	-1.21175	-0.777521	1.14627	-1.05166	0.557633	2.61643	0.00817601	0.236294	0.443505	0.268924	0.304491	0.580168	0.0255163	0.0377864	0.741762	0.872061	0.730572
ABarp	18	14.3365	18.0404	20.0947	20.501	19.773	19.7158	1.11387	n.s.	0.964487	n.s.	0.961698	n.s.	1.41591	3.08947	3.14338	3.54537	2.82166	3.0204	0.101232	0.173929	0.157338	0.175212	0.144189	0.15958	10	16	43	19	24	6	4.14875	-2.19376	-1.79826	-1.15148	-2.25986	0.730507	0.531583	0.000402488	0.035414	0.082131	0.278518	0.0320015	0.470098	0.606873	0.00529426	0.44168	0.617135	0.730572
ABpla	19	16.4841	18.0764	19.1819	19.706	18.767	18.9278	1.06115	n.s.	0.952349	n.s.	0.960512	n.s.	1.85821	3.25738	2.99998	3.16456	2.86194	3.39627	0.115546	0.183016	0.157306	0.162702	0.154087	0.186909	10	16	43	19	24	6	1.58568	-1.49366	-0.689021	-0.529484	-1.1835	1.00767	0.49719	0.12596	0.145166	0.496223	0.609713	0.247711	0.320196	0.632509	0.202814	0.577808	0.902015	0.786838
ABplp	20	17.3035	17.4151	18.3829	18.6175	18.1972	18.9544	1.05557	n.s.	0.977422	n.s.	1.0181	n.s.	2.13739	2.49181	2.9001	3.31702	2.58191	1.64622	0.126612	0.145468	0.158678	0.180511	0.143364	0.0904702	10	15	43	19	24	6	0.119593	-1.20664	-0.940353	-1.65454	-1.23963	0.454103	-0.331864	0.905921	0.236431	0.354381	0.120058	0.225311	0.652692	0.743851	0.918915	0.741762	0.793506	0.495014
ABpra	21	15.6417	16.8424	17.6005	17.6925	17.5276	16.7557	1.04501	n.s.	0.990684	n.s.	0.947054	n.s.	1.89836	2.03136	2.90622	3.2113	2.70928	1.86957	0.124399	0.122494	0.166082	0.183895	0.156182	0.116227	10	16	43	19	24	6	1.52697	-0.950002	-0.91264	0.094549	-1.12467	0.178922	0.883044	0.142226	0.349502	0.36728	0.926584	0.267682	0.859023	0.391116	0.219105	0.800176	0.793506	0.946604
ABprp	22	15.4207	18.5134	19.9965	19.9777	20.0113	19.2118	1.08011	n.s.	1.00169	n.s.	0.961664	n.s.	1.40541	2.71506	3.10853	2.94549	3.29469	2.17716	0.0934165	0.148945	0.156358	0.149379	0.166356	0.118046	10	16	43	19	24	6	3.81192	-1.52883	-1.56769	-0.624501	-1.79134	-0.0353119	0.685938	0.000873715	0.135924	0.125662	0.544749	0.0831347	0.972005	0.506471	0.00870502	0.577808	0.687215	0.786838
MSa	23	16.2482	19.9934	21.3087	22.6363	20.2698	20.6461	1.06579	n.s.	0.895453	n.s.	0.91208	n.s.	1.96533	4.07196	3.24761	3.76091	2.38243	2.968	0.123981	0.207582	0.153337	0.168453	0.118814	0.149745	10	13	41	18	23	6	2.90534	-1.84081	-0.223959	-0.394045	-1.06241	2.32891	1.32562	0.00937852	0.0776842	0.825498	0.699801	0.302805	0.0275122	0.212154	0.0395622	0.515664	0.950897	0.798596
MSp	24	15.3997	18.0735	20.9402	21.4654	20.5293	17.8409	1.15862	n.s.	0.95639	n.s.	0.831149	n.s.	1.38133	2.9178	3.73462	3.1638	4.14993	3.70943	0.0919409	0.164545	0.179434	0.149438	0.204344	0.21658	10	13	41	18	23	6	2.90756	-3.08227	-2.07279	0.135455	-2.87384	0.819483	2.14717	0.00939993	0.00466919	0.0462804	0.895602	0.00804213	0.417493	0.0658966	0.0395622	0.280833	0.557256	0.944276
Ea	25	26.8845	33.6723	30.8048	32.181	29.9073	29.6487	0.914842	n.s.	0.929344	n.s.	0.921309	n.s.	2.18886	4.5166	4.15337	3.98176	4.09749	3.37016	0.0834527	0.136714	0.135716	0.125792	0.138496	0.118406	10	13	38	15	23	6	4.74274	0.920188	2.48301	2.16239	2.01595	1.70097	1.47441	0.000158287	0.366557	0.0207417	0.0498112	0.0578526	0.0990594	0.168594	0.00365858	0.804151	0.557256	0.371669
Ep	26	31.5994	33.8881	31.0257	31.412	30.7738	26.3403	0.915535	n.s.	0.979683	n.s.	0.838542	n.s.	1.40427	2.61863	3.62024	4.03853	3.39044	3.69209	0.0455508	0.0787589	0.117453	0.130709	0.11137	0.146009	10	13	38	15	23	6	2.68858	1.94852	3.07267	4.51116	3.06458	0.506589	2.76717	0.0145029	0.0630262	0.00443487	0.00238136	0.00469573	0.616665	0.0197034	0.0506121	0.45694	0.194026	0.115496
Ca	27	14.1298	17.8426	18.5468	18.0447	18.8742	18.8329	1.03946	n.s.	1.04597	n.s.	1.04368	n.s.	1.36517	1.96037	3.06183	2.5886	3.34941	3.78933	0.0990315	0.111983	0.166173	0.145846	0.179389	0.209592	10	13	38	15	23	6	5.34789	-0.234516	-1.16548	-0.603928	-0.95613	-0.858076	-0.46774	2.71071e-05	0.816451	0.251958	0.567081	0.34597	0.396716	0.654274	0.0015451	0.921638	0.793506	0.786838
Cp	28	16.4998	18.6099	19.4186	20.0469	19.0089	17.7303	1.04346	n.s.	0.948221	n.s.	0.884444	n.s.	2.2286	2.95172	3.55963	4.03611	3.24024	2.76345	0.138445	0.16166	0.184516	0.204689	0.172313	0.162354	10	13	38	15	23	6	1.95336	-1.08434	-0.375882	0.630998	-0.807249	0.835771	1.50833	0.0642299	0.288421	0.709935	0.541602	0.427164	0.411081	0.154298	0.12481	0.754604	0.936171	0.786838
D	29	21.8374	24.8758	22.1457	22.4682	21.9354	20.819	0.89025	n.s.	0.976286	n.s.	0.926596	n.s.	2.25233	2.13692	3.08798	3.50142	2.84925	3.5945	0.10572	0.0875553	0.140357	0.158436	0.131305	0.179849	10	13	38	15	23	6	3.27918	2.22719	3.50394	2.5634	3.51813	0.492531	0.956875	0.00395424	0.0357644	0.00141372	0.0388355	0.00139596	0.626532	0.363491	0.0226821	0.44168	0.1237	0.342459
P4	30	46.0653	42.7651	30.4876	32.4651	29.1978	22.5397	0.712907	n.s.	0.89936	n.s.	0.694274	n.s.	4.8177	8.97524	6.46114	8.29687	4.69024	3.99099	0.107199	0.214643	0.213321	0.259822	0.162382	0.185918	10	11	38	15	23	5	-1.06268	2.98427	4.71506	6.23909	4.23069	1.38743	3.55962	0.304101	0.00715521	0.000431631	2.18085e-05	0.000958787	0.180659	0.00286359	0.394385	0.280833	0.0755354	0.00211543
ABalaa	31	14.9935	18.0482	18.5483	18.8663	18.3409	18.9296	1.02771	n.s.	0.972154	n.s.	1.00336	n.s.	2.22778	3.15284	3.86247	4.67738	3.32481	2.93746	0.152298	0.178049	0.209609	0.252055	0.183248	0.162937	10	13	38	15	23	5	2.72036	-0.548642	-0.262283	-0.558527	-0.46485	0.377267	-0.0355096	0.0128531	0.58819	0.795156	0.592116	0.646012	0.709412	0.972292	0.0467636	0.913796	0.950897	0.786838
ABalap	32	17.4002	20.6394	19.7485	20.3507	19.3558	20.8265	0.956834	n.s.	0.951112	n.s.	1.02338	n.s.	2.5743	2.43063	3.52685	4.01466	3.20226	4.08398	0.151645	0.120031	0.179763	0.200562	0.16724	0.2059	10	13	38	15	23	5	3.06464	0.233509	1.35285	-0.0960926	1.00761	0.806883	-0.226571	0.00640391	0.817393	0.185927	0.927087	0.321597	0.427266	0.827426	0.0316293	0.921638	0.741435	0.946604
ABalpa	33	14.8202	19.7348	19.7474	20.6285	19.1727	18.4609	1.00063	n.s.	0.929426	n.s.	0.894919	n.s.	1.51995	3.31346	3.55501	3.88227	3.28466	2.71497	0.105124	0.171128	0.181209	0.191336	0.173182	0.154419	10	13	38	15	23	5	4.73891	-0.657169	0.490476	0.836631	-0.0115415	1.19917	1.37674	0.000171162	0.516848	0.6281	0.424645	0.990895	0.241093	0.198673	0.00365858	0.881683	0.9042	0.785997
ABalpp	34	15.5988	19.2206	18.3925	18.9218	18.0473	17.9766	0.956913	n.s.	0.953782	n.s.	0.950048	n.s.	2.23928	3.58865	3.24773	3.69086	2.95888	2.1287	0.147144	0.190299	0.177741	0.19831	0.165734	0.124336	10	13	38	15	23	5	2.96504	0.216873	1.00201	0.903245	0.735393	0.770334	0.70169	0.00757375	0.830025	0.327599	0.383429	0.470998	0.448219	0.495772	0.0359753	0.921638	0.793506	0.785997
ABaraa	35	14.1374	18.4602	19.1193	18.1122	19.776	15.5088	1.0357	n.s.	1.09186	n.s.	0.856258	n.s.	2.29112	2.79848	3.25478	3.3476	3.08913	5.38074	0.166112	0.15451	0.171356	0.187906	0.157904	0.364296	10	13	38	15	23	5	4.07135	0.299571	-1.30451	1.16733	-0.702031	-1.54344	1.01823	0.000553067	0.766888	0.202994	0.297159	0.48941	0.133828	0.35463	0.00675532	0.921638	0.741435	0.730572
ABarap	36	13.1321	16.7056	17.6263	17.5172	17.6974	16.7127	1.05511	n.s.	1.01029	n.s.	0.95407	n.s.	2.07331	1.78694	2.75672	3.2856	2.42857	3.99036	0.161828	0.109024	0.157427	0.19069	0.138719	0.250701	10	13	38	15	23	5	4.34791	-0.826065	-1.39972	-0.00380609	-1.37918	-0.182371	0.407181	0.00039444	0.417567	0.171387	0.997122	0.177255	0.856834	0.698175	0.00529426	0.830841	0.741435	0.997122
ABarpa	37	15.3522	19.6503	19.2875	18.9907	19.4811	17.4009	0.981537	n.s.	1.02582	n.s.	0.916284	n.s.	1.63155	1.95025	3.2442	2.91668	3.49114	5.78216	0.108932	0.101156	0.169309	0.156145	0.181154	0.348906	10	13	38	15	23	5	5.74998	0.711426	0.18659	0.85148	0.480742	-0.468223	0.590291	1.08243e-05	0.483526	0.853091	0.438801	0.633672	0.642642	0.58224	0.000925477	0.857327	0.950897	0.785997
ABarpp	38	17.8174	20.8267	20.3856	21.1362	19.8961	19.8187	0.978822	n.s.	0.941329	n.s.	0.937669	n.s.	1.86779	3.1575	4.70041	4.02734	5.11877	4.74528	0.107451	0.154524	0.232092	0.193718	0.260072	0.251406	10	13	38	15	23	5	2.84891	-0.227663	0.674029	0.439045	0.37985	0.832196	0.557476	0.00995112	0.821704	0.504898	0.677567	0.706625	0.411006	0.597203	0.0395731	0.921638	0.902015	0.798596
ABplaa	39	16.1604	16.9329	18.5762	19.3602	18.065	17.9076	1.09705	n.s.	0.9331	n.s.	0.924972	n.s.	2.11562	2.39787	3.59897	4.42892	2.93413	3.35393	0.134186	0.144333	0.195015	0.232577	0.164186	0.196655	10	13	38	15	23	5	0.818909	-1.83483	-1.25272	-0.594046	-1.85692	0.998677	0.770126	0.422241	0.0800169	0.220176	0.575457	0.0726812	0.328803	0.460706	0.515486	0.515664	0.755506	0.786838
ABplap	40	15.6986	18.0412	20.495	21.4012	19.904	17.0989	1.13601	n.s.	0.930041	n.s.	0.798967	n.s.	2.11155	3.07108	3.6101	5.03878	2.19932	2.48751	0.137868	0.1735	0.177305	0.239368	0.111697	0.152752	10	13	38	15	23	5	2.16444	-2.16074	-1.92564	0.672566	-2.37388	1.08535	2.51338	0.042214	0.0411255	0.0691766	0.518062	0.0258513	0.292472	0.0242168	0.105081	0.44168	0.557256	0.786838
ABplpa	41	13.2103	18.2947	18.3579	18.0775	18.5408	19.6379	1.00346	n.s.	1.02563	n.s.	1.08631	n.s.	2.32643	3.39424	3.52503	4.09889	3.18087	2.20497	0.18051	0.189099	0.19328	0.230519	0.173426	0.117896	10	13	38	15	23	5	4.25559	0.153341	-0.213705	-0.985217	-0.057395	-0.370935	-1.07868	0.000359309	0.879316	0.832606	0.344888	0.95476	0.713844	0.29972	0.00529426	0.94445	0.950897	0.760321
ABplpp	42	17.6678	19.3531	20.9548	20.125	21.496	22.3815	1.08276	n.s.	1.06812	n.s.	1.11213	n.s.	1.88016	3.16804	3.19788	3.24094	3.12076	3.38098	0.109078	0.166845	0.153613	0.163725	0.146757	0.158614	10	13	38	15	23	5	1.58853	-0.636114	-1.95982	-1.73171	-1.56968	-1.29333	-1.30577	0.127904	0.53035	0.0613843	0.127581	0.131438	0.206019	0.235	0.202814	0.887316	0.557256	0.495014
ABpraa	43	13.3975	20.1001	20.1471	20.6773	19.8014	17.8064	1.00234	n.s.	0.95764	n.s.	0.861158	n.s.	2.23102	4.13883	2.95349	2.96087	2.9623	2.68752	0.170688	0.209871	0.147561	0.145581	0.151227	0.158477	10	13	38	15	23	5	4.97452	-0.418498	0.229145	1.38008	-0.0378198	0.891173	2.01545	8.24672e-05	0.679754	0.821194	0.193914	0.970288	0.379908	0.0807847	0.0027479	0.921638	0.950897	0.626987
ABprap	44	14.8277	19.5307	19.7692	19.189	20.1475	19.5448	1.01221	n.s.	1.04995	n.s.	1.01854	n.s.	1.9119	2.77176	2.84116	3.84339	1.9485	1.69146	0.132165	0.144648	0.144662	0.203629	0.0977631	0.0908701	10	13	38	15	23	5	4.80865	0.272141	-0.709421	-0.0131085	-0.266094	-0.893831	-0.285106	9.64174e-05	0.787727	0.486752	0.989753	0.792727	0.382742	0.779211	0.0027479	0.921638	0.902015	0.997122
ABprpa	45	15.0981	19.0766	18.5909	19.457	18.0261	17.3434	0.974538	n.s.	0.926457	n.s.	0.891371	n.s.	2.5515	2.36133	3.45411	3.84193	3.1349	3.89075	0.17322	0.126161	0.187018	0.200749	0.175799	0.235552	10	13	38	15	23	5	3.8285	-0.319993	1.13537	0.932258	0.563548	1.2045	1.05526	0.0011627	0.751786	0.264916	0.392593	0.57716	0.239366	0.327262	0.00946773	0.921638	0.793506	0.785997
ABprpp	46	15.6339	18.4909	19.9778	20.6746	19.5233	19.7986	1.08041	n.s.	0.944315	n.s.	0.957627	n.s.	1.21853	3.3569	3.28528	3.67284	3.00343	1.82024	0.0798905	0.185035	0.165529	0.180611	0.15551	0.0965347	10	13	38	15	23	5	2.83537	-1.64319	-0.920154	-1.05738	-1.38604	1.01304	0.700961	0.0120244	0.112425	0.367137	0.308798	0.180669	0.320464	0.494377	0.0456925	0.577808	0.793506	0.730572
MSaa	47	15.5476	20.1354	18.0007	18.3895	17.764	17.8053	0.893983	n.s.	0.965984	n.s.	0.968232	n.s.	1.68759	2.74603	3.3249	3.8823	3.00481	2.6141	0.111257	0.139001	0.185958	0.214884	0.17099	0.154157	10	13	37	14	23	5	4.9332	1.35641	2.40454	1.66997	2.2771	0.516088	0.373746	7.81298e-05	0.187903	0.0233222	0.135169	0.0314881	0.61084	0.71587	0.0027479	0.653902	0.557256	0.504285
MSap	48	17.895	21.698	20.417	20.438	20.4043	17.9042	0.940963	n.s.	0.998351	n.s.	0.876026	n.s.	1.94412	4.33243	3.84639	3.63474	4.04999	1.18932	0.111357	0.203509	0.189664	0.181018	0.200645	0.0697484	10	13	37	14	23	5	2.81758	0.815471	0.880887	2.8871	0.943403	0.0261829	2.28783	0.0116185	0.42298	0.387248	0.0110565	0.357269	0.979285	0.0352338	0.0451537	0.830841	0.808674	0.178746
MSpa	49	16.7009	18.4747	18.4323	18.9067	18.1436	18.0145	0.997705	n.s.	0.959641	n.s.	0.952815	n.s.	2.00032	2.19393	2.78248	2.65781	2.87482	1.95759	0.122767	0.121037	0.151977	0.143086	0.16017	0.114101	10	13	37	14	23	5	2.02089	-0.461813	0.387655	0.43161	0.0556876	0.820971	0.791304	0.0566677	0.64826	0.700939	0.677198	0.956007	0.418288	0.447672	0.123877	0.921638	0.936171	0.798596
MSpp	50	18.6847	21.2583	22.9292	23.3923	22.6472	20.4688	1.0786	n.s.	0.96815	n.s.	0.875022	n.s.	2.43799	3.78006	4.14232	3.45131	4.56288	2.60515	0.133742	0.181235	0.181878	0.150175	0.203666	0.133638	10	13	37	14	23	5	1.97761	-1.52819	-0.981059	0.503744	-1.33651	0.562238	1.96738	0.0615764	0.139369	0.334643	0.624603	0.19451	0.577732	0.0791751	0.123877	0.577808	0.793506	0.786838
Caa	51	18.3982	22.3294	22.4519	23.9578	21.5353	20.4386	1.00549	n.s.	0.898885	n.s.	0.85311	n.s.	2.9511	4.21668	3.82435	3.20798	3.94085	2.70872	0.164411	0.193132	0.171486	0.136292	0.184984	0.139156	10	11	37	14	23	5	2.49264	-1.06191	0.524572	1.0767	-0.0863809	2.03989	2.37127	0.0227106	0.302119	0.606069	0.30297	0.932289	0.0497062	0.0438401	0.0693484	0.754604	0.9042	0.730572
Cap	52	25.1421	28.8778	25.6571	27.4884	24.4916	22.2865	0.888471	n.s.	0.89098	n.s.	0.810759	n.s.	2.5389	3.66858	4.57097	5.52734	3.5002	3.60037	0.103506	0.129926	0.179394	0.204669	0.144538	0.169627	10	11	36	14	22	5	2.73315	0.752839	3.28718	3.37413	2.39799	1.81071	2.3806	0.0137416	0.459359	0.00382049	0.00980212	0.0261414	0.0854746	0.0361997	0.0489544	0.838153	0.194026	0.178746
Cpa	53	18.9273	21.9309	21.7057	21.035	22.1139	23.3395	0.98973	n.s.	1.05129	n.s.	1.10956	n.s.	2.38649	3.3501	3.09272	2.3491	3.45404	4.49395	0.12924	0.155939	0.143447	0.11367	0.15789	0.202175	10	12	37	14	23	5	2.44854	0.777063	-0.151784	-0.63154	0.206151	-1.1293	-1.0945	0.023899	0.446531	0.880678	0.55116	0.83905	0.266572	0.325545	0.0697915	0.835446	0.962264	0.786838
Cpp	54	24.7296	27.5857	26.6167	27.0439	26.3448	23.1403	0.964871	n.s.	0.974149	n.s.	0.855658	n.s.	3.3322	3.15942	3.45794	3.83478	3.25982	4.16234	0.138114	0.117134	0.130819	0.14433	0.125143	0.188867	10	11	36	14	22	5	2.01068	0.387224	1.05236	2.12592	0.87037	0.564562	1.83702	0.0591142	0.702162	0.304773	0.0761691	0.395575	0.577505	0.111343	0.123877	0.921638	0.793506	0.410467
ABalaaa	55	16.7639	17.7415	18.7121	18.4692	18.874	16.2693	1.0547	n.s.	1.02192	n.s.	0.880891	n.s.	2.84394	2.84857	4.23386	5.69631	3.05181	1.27271	0.173888	0.164208	0.22788	0.31393	0.163619	0.0831166	10	11	35	14	21	4	0.78613	-0.416264	-1.04198	1.3773	-0.868111	-0.243623	1.3332	0.44158	0.681658	0.308883	0.193631	0.393545	0.810274	0.201319	0.531761	0.921638	0.793506	0.626987
ABalaap	56	20.6425	24.2121	21.6829	22.3535	21.2358	17.8901	0.89554	n.s.	0.950001	n.s.	0.800326	n.s.	2.68467	3.76708	4.06424	5.08474	3.27881	2.37483	0.133307	0.159123	0.188779	0.231532	0.156238	0.141042	10	11	35	14	21	4	2.51724	1.04939	2.21713	3.84741	1.90535	0.727738	2.4733	0.0214989	0.304924	0.0396615	0.00409638	0.0728827	0.475127	0.0301449	0.0678141	0.754604	0.557256	0.132449
ABalapa	57	15.7996	19.6143	18.6111	19.3163	18.141	19.2634	0.948854	n.s.	0.939152	n.s.	0.997259	n.s.	2.65705	2.94521	3.37723	3.97829	2.91925	4.43988	0.172377	0.153569	0.182759	0.209633	0.162836	0.244889	10	11	35	14	21	4	3.12036	0.215096	1.34812	0.146772	0.950279	0.94827	0.0215134	0.00563343	0.831593	0.192503	0.890402	0.353892	0.353223	0.983761	0.0291914	0.921638	0.741435	0.944276
ABalapp	58	15.7053	20.6028	19.9949	20.6811	19.5374	17.0388	0.970494	n.s.	0.9447	n.s.	0.823881	n.s.	2.519	5.39651	3.78842	4.56387	3.21099	2.15229	0.164402	0.267884	0.190823	0.224619	0.166307	0.134212	10	11	35	14	21	4	2.70337	-0.0385016	0.601377	1.82697	0.347659	0.81303	2.23921	0.0167731	0.969677	0.557329	0.0914474	0.733559	0.425123	0.0460784	0.0562392	0.996001	0.902015	0.45146
ABalpaa	59	16.316	18.9309	18.0886	18.4888	17.8218	16.9082	0.955503	n.s.	0.963921	n.s.	0.914508	n.s.	1.97804	3.09212	3.35492	3.58541	3.25447	3.85785	0.124264	0.167049	0.186797	0.197386	0.184786	0.242425	10	11	35	14	21	4	2.32914	0.330706	0.946423	0.94416	0.771948	0.559277	0.733878	0.0323117	0.743893	0.35451	0.393051	0.450139	0.580743	0.498698	0.0850047	0.921638	0.793506	0.785997
ABalpap	60	17.3942	19.8735	17.8118	17.2898	18.1598	18.7744	0.896261	n.s.	1.05032	n.s.	1.08587	n.s.	2.07427	2.51591	3.32551	3.44241	3.28326	1.4463	0.122232	0.129474	0.188036	0.202656	0.182951	0.0818502	10	11	35	14	21	4	2.47224	2.16673	1.64231	1.04867	2.18362	-0.746092	-1.26868	0.0231364	0.040901	0.112749	0.319735	0.0399178	0.462041	0.227107	0.0694091	0.44168	0.682494	0.738436
ABalppa	61	17.2781	18.8354	17.7031	18.6053	17.1016	18.2015	0.939884	n.s.	0.919179	n.s.	0.978295	n.s.	1.41969	3.31986	3.3362	4.02996	2.72312	3.32993	0.0842212	0.180262	0.189799	0.22047	0.161127	0.194382	10	11	35	14	21	4	1.41961	0.156489	1.48942	0.326313	0.985572	1.22242	0.20365	0.177903	0.877018	0.154462	0.756567	0.33828	0.23518	0.845582	0.269216	0.94445	0.741435	0.843529
ABalppp	62	17.7203	18.9058	19.1246	18.3715	19.6267	19.3706	1.01158	n.s.	1.06832	n.s.	1.05438	n.s.	1.74073	3.23901	3.26085	2.24776	3.75906	1.16195	0.10069	0.175218	0.171723	0.124535	0.193808	0.0637345	10	11	35	14	21	4	1.05748	0.465948	-0.565279	-0.409078	-0.195178	-1.23453	-1.1955	0.306382	0.647128	0.577289	0.689177	0.847583	0.225799	0.259041	0.394385	0.921638	0.902015	0.798596
ABaraaa	63	14.7901	17.9555	18.7239	19.3431	18.311	16.8786	1.04279	n.s.	0.946642	n.s.	0.872588	n.s.	2.0836	2.63814	3.96644	4.9967	3.17325	4.25493	0.1444	0.150266	0.213352	0.262932	0.175361	0.267846	10	11	35	14	21	4	3.06459	-0.892736	-0.337126	0.474132	-0.738618	0.686111	0.981159	0.00647383	0.382356	0.738951	0.660884	0.46689	0.500524	0.366789	0.0316293	0.811341	0.943113	0.798596
ABaraap	64	15.3027	16.7402	17.7055	18.7918	16.9813	15.1607	1.05766	n.s.	0.903657	n.s.	0.806774	n.s.	2.61714	3.31616	3.29031	4.23731	2.31454	5.09601	0.1753	0.202597	0.187162	0.229514	0.137922	0.35714	10	11	35	14	21	4	1.10751	-1.35804	-0.215245	0.577052	-0.843699	1.46006	1.30223	0.282142	0.187627	0.832427	0.59507	0.410778	0.161305	0.258728	0.38597	0.653902	0.950897	0.786838
ABarapa	65	16.0297	17.9391	18.7649	18.3875	19.0165	15.999	1.04603	n.s.	1.03421	n.s.	0.8701	n.s.	1.55079	3.17433	3.06951	3.47886	2.82568	3.72216	0.0991636	0.180971	0.164746	0.192576	0.15036	0.247191	10	11	35	14	21	4	1.77554	-0.335995	-0.946233	0.927096	-0.758459	-0.563775	1.14811	0.0963602	0.739999	0.356268	0.399004	0.458986	0.57815	0.306898	0.16644	0.921638	0.793506	0.785997
ABarapp	66	15.9881	19.8381	18.5783	18.8421	18.4025	16.9545	0.936498	n.s.	0.976667	n.s.	0.899816	n.s.	3.5266	3.45198	2.90409	2.19829	3.33392	1.96635	0.226091	0.177962	0.157432	0.118752	0.183324	0.123227	10	11	35	14	21	4	2.52386	0.833327	1.13053	2.01407	1.09473	0.470147	1.64813	0.0208199	0.416831	0.271765	0.072265	0.291216	0.641342	0.15623	0.0671736	0.830841	0.793506	0.410467
ABarpaa	67	14.0541	16.5422	17.3032	17.8649	16.9101	14.9574	1.04601	n.s.	0.946554	n.s.	0.837253	n.s.	2.02144	3.16119	3.12245	4.17489	2.14779	2.46735	0.147429	0.195442	0.181782	0.237866	0.1286	0.175268	10	11	34	14	20	4	2.168	-0.901365	-0.344723	1.01652	-0.696148	0.786001	1.74789	0.0445003	0.376743	0.735024	0.343637	0.495854	0.44218	0.116028	0.107833	0.8093	0.943113	0.760321
ABarpap	68	15.444	19.7852	19.3652	19.7926	19.0803	18.1222	0.978775	n.s.	0.964013	n.s.	0.915604	n.s.	2.10962	4.31989	3.66685	4.90993	2.641	3.291	0.140013	0.223302	0.190704	0.252499	0.140062	0.192951	10	11	35	14	21	4	2.96648	-0.00401617	0.494875	0.792421	0.29113	0.496979	0.793668	0.00971703	0.996831	0.628348	0.453771	0.774987	0.625199	0.452267	0.0395622	0.996831	0.9042	0.785997
ABarppa	69	15.1412	17.229	19.5886	19.5558	19.6104	16.2586	1.13695	n.s.	1.00279	n.s.	0.831393	n.s.	2.96056	2.82567	4.3369	5.92486	3.02589	5.27687	0.200418	0.167734	0.222981	0.308382	0.156137	0.344844	10	11	35	14	21	4	1.64934	-1.294	-2.20932	0.350022	-2.09936	-0.0318386	1.07153	0.115866	0.210787	0.0380173	0.745592	0.0456103	0.97496	0.329554	0.190511	0.692019	0.557256	0.840959
ABarppp	70	16.4123	19.4464	19.8739	20.0556	19.7528	18.7097	1.02198	n.s.	0.9849	n.s.	0.932893	n.s.	1.66645	2.8995	3.13817	4.43539	1.97889	1.58627	0.104075	0.152491	0.159032	0.225104	0.101376	0.0900819	10	11	35	14	21	4	2.97235	-0.4136	-0.314198	0.624083	-0.41806	0.240035	0.943623	0.00888536	0.683104	0.75769	0.546276	0.680848	0.813261	0.360736	0.0395622	0.921638	0.947113	0.786838
ABplaaa	71	15.3637	18.3379	18.5582	18.8952	18.3335	17.2018	1.01201	n.s.	0.970277	n.s.	0.91038	n.s.	1.84388	3.28204	3.99118	4.82046	3.44147	2.10711	0.123016	0.183044	0.216599	0.259672	0.189949	0.130149	10	11	35	14	21	4	2.58945	-0.34306	0.00347742	0.785988	-0.183967	0.376618	1.0175	0.0197555	0.734721	0.997258	0.452946	0.855876	0.710114	0.328478	0.0649653	0.921638	0.997258	0.785997
ABplaap	72	14.099	17.8533	17.796	18.5721	17.2787	15.1543	0.996794	n.s.	0.930359	n.s.	0.815974	n.s.	2.41864	2.46318	3.55535	3.32554	3.68752	0.804322	0.175835	0.141104	0.20121	0.182259	0.215955	0.0563926	10	11	35	14	21	4	3.52152	-0.620581	0.524728	3.19565	0.0599172	1.07876	3.50343	0.0022998	0.54099	0.603905	0.00702689	0.952711	0.289302	0.00294981	0.0170985	0.890796	0.9042	0.170402
ABplapa	73	16.171	18.4662	18.9471	19.227	18.7605	17.7337	1.02604	n.s.	0.975734	n.s.	0.922332	n.s.	3.43269	2.27525	3.87398	4.40434	3.57951	2.53019	0.217581	0.126011	0.205924	0.233161	0.193072	0.151594	10	11	35	14	21	4	1.78739	-0.5584	-0.283019	0.509021	-0.507023	0.330256	0.864182	0.0935532	0.582682	0.779197	0.632836	0.615926	0.744078	0.410166	0.163241	0.913796	0.950897	0.786988
ABplapp	74	15.4387	19.7165	18.6385	20.2988	17.5317	17.0297	0.945326	n.s.	0.863684	n.s.	0.838954	n.s.	2.20869	2.70447	3.28907	3.02645	3.03665	1.6945	0.146638	0.140285	0.177727	0.151758	0.175271	0.105721	10	11	35	14	21	4	3.9843	-0.506937	2.07933	2.28488	1.09228	2.64629	2.79082	0.000807748	0.617119	0.0491111	0.048639	0.287583	0.0131859	0.0206053	0.00863281	0.921638	0.557256	0.371669
ABplpaa	75	15.8843	18.3095	18.3289	18.625	18.1315	18.0999	1.00106	n.s.	0.973502	n.s.	0.971806	n.s.	1.88411	2.14106	3.66711	4.43666	3.15661	2.16684	0.12158	0.119595	0.201502	0.242464	0.176168	0.127198	10	11	35	14	21	4	2.76061	-0.233699	0.188553	0.166192	-0.0216816	0.359888	0.326932	0.0124511	0.817641	0.851816	0.874153	0.982848	0.722417	0.749919	0.0462855	0.921638	0.950897	0.942143
ABplpap	76	15.7724	19.4028	18.8626	18.271	19.257	18.4862	0.97216	n.s.	1.05397	n.s.	1.01178	n.s.	2.03858	2.94931	3.52113	3.21391	3.73562	2.28855	0.132481	0.155459	0.188006	0.179044	0.196297	0.131535	10	11	35	14	21	4	3.30535	0.91543	0.120829	0.632485	0.504814	-0.83266	-0.150411	0.00397931	0.369725	0.904791	0.547287	0.619263	0.411457	0.884784	0.0226821	0.804151	0.963521	0.786838
ABplppa	77	15.7287	21.0002	19.5692	20.4056	19.0117	19.1547	0.931859	n.s.	0.931689	n.s.	0.938696	n.s.	2.24534	3.01438	3.57563	4.2505	3.02907	2.68973	0.146323	0.146803	0.184022	0.21202	0.161224	0.149198	10	11	35	14	21	4	4.5706	0.408714	1.76945	1.137	1.31103	1.06058	0.710588	0.000226872	0.68656	0.0916886	0.29896	0.204949	0.300554	0.497822	0.00403283	0.921638	0.617135	0.730572
ABplppp	78	16.2371	20.6786	19.1442	18.6458	19.4765	18.2664	0.925799	n.s.	1.04456	n.s.	0.979652	n.s.	1.38608	2.71677	3.46631	4.01736	3.10575	3.37409	0.0874987	0.134367	0.182356	0.219304	0.16136	0.196261	10	11	35	14	21	4	4.78071	1.50526	1.13065	1.28625	1.52352	-0.654303	0.18973	0.000235838	0.146112	0.269861	0.260471	0.142395	0.519394	0.856088	0.00403283	0.577808	0.793506	0.730572
ABpraaa	79	15.2461	16.9512	19.34	19.0019	19.5653	17.8395	1.14092	n.s.	1.02965	n.s.	0.938827	n.s.	2.05674	4.40851	3.28479	4.31753	2.46834	0.433631	0.138275	0.265982	0.171058	0.231273	0.127661	0.0258265	10	11	35	14	21	4	1.15226	-1.16505	-1.82271	-0.659588	-1.65828	-0.442435	0.990044	0.267931	0.256819	0.0907749	0.523702	0.120018	0.663248	0.339123	0.372489	0.744775	0.617135	0.786838
ABpraap	80	16.8636	20.0645	19.4809	20.1817	19.0137	16.8668	0.970915	n.s.	0.942129	n.s.	0.835749	n.s.	2.26765	3.79569	3.59585	3.90685	3.38925	2.48455	0.137832	0.193474	0.185902	0.197041	0.180375	0.156511	10	11	35	14	21	4	2.37006	-0.075635	0.771122	1.89315	0.450353	0.912763	2.04267	0.0302256	0.940396	0.45038	0.0930845	0.658476	0.370019	0.0761079	0.0819689	0.979814	0.875738	0.45146
ABprapa	81	15.7496	18.3272	19.6317	18.8692	20.14	16.5022	1.07118	n.s.	1.06735	n.s.	0.874555	n.s.	1.80329	3.44707	3.75213	4.491	3.18515	3.65216	0.11736	0.19236	0.192491	0.242257	0.160033	0.235146	10	11	35	14	21	4	2.17428	-0.341395	-1.4499	0.868582	-1.07142	-0.916229	1.08321	0.0456794	0.735906	0.16336	0.424071	0.298061	0.369663	0.320999	0.107833	0.921638	0.741435	0.785997
ABprapp	82	17.1668	22.1254	20.7092	20.5131	20.8399	18.6784	0.935992	n.s.	1.01594	n.s.	0.910564	n.s.	1.98929	4.07439	2.85729	3.60086	2.3251	2.16752	0.118777	0.188335	0.138958	0.178675	0.112898	0.123297	10	11	35	14	21	4	3.59276	1.03319	0.967143	2.10411	1.07288	-0.300463	1.26579	0.0027156	0.313733	0.350473	0.0604165	0.302494	0.766892	0.239595	0.0189717	0.758189	0.793506	0.410467
ABprpaa	83	15.9845	19.2019	18.8421	19.1521	18.6355	18.0536	0.981264	n.s.	0.973025	n.s.	0.942644	n.s.	1.9637	3.81023	4.03527	5.45197	2.87213	2.05307	0.125922	0.20294	0.215692	0.28975	0.155956	0.120828	10	11	35	14	21	4	2.46373	0.0268302	0.43281	0.745323	0.269268	0.325703	0.616303	0.0260949	0.978829	0.670886	0.472663	0.790846	0.748435	0.547531	0.0731513	0.996001	0.925883	0.786838
ABprpap	84	16.0322	19.5281	18.1543	18.6493	17.8243	16.4204	0.929648	n.s.	0.955762	n.s.	0.880482	n.s.	1.61647	2.23828	3.8149	3.94645	3.78572	1.84762	0.103348	0.117223	0.211639	0.215393	0.214919	0.119552	10	11	35	14	21	4	4.1294	0.70186	1.59726	2.71644	1.47185	0.615787	1.5897	0.000621082	0.490399	0.120899	0.0321454	0.15169	0.543156	0.139151	0.00708034	0.857327	0.682494	0.342459
ABprppa	85	17.1064	19.8359	20.459	20.3831	20.5096	18.8877	1.03141	n.s.	1.00621	n.s.	0.926639	n.s.	2.1824	2.56148	4.10798	4.5873	3.87343	1.67559	0.130767	0.132068	0.202225	0.229073	0.191108	0.0942575	10	11	35	14	21	4	2.63532	-0.377583	-0.588352	0.832151	-0.59989	-0.0849637	1.007	0.0163375	0.70952	0.560991	0.428247	0.553504	0.932976	0.330575	0.0558743	0.921638	0.902015	0.785997
ABprppp	86	17.4936	19.6051	18.4139	19.0295	18.0035	16.9743	0.93924	n.s.	0.946079	n.s.	0.891996	n.s.	2.43003	3.16146	3.19431	3.46976	3.01304	0.90244	0.142382	0.164922	0.174712	0.185591	0.169352	0.056488	10	11	35	14	21	4	1.72453	0.432778	1.38313	2.49455	1.08734	0.902643	1.99292	0.101256	0.669309	0.182208	0.027067	0.292121	0.375258	0.0636131	0.171433	0.921638	0.741435	0.342459
Eal	87	26.5848	32.0062	28.0045	28.2364	27.8421	24.5601	0.874972	n.s.	0.986036	n.s.	0.869802	n.s.	2.32405	4.22855	4.55362	4.22864	4.86952	5.50333	0.0896057	0.135787	0.163799	0.152433	0.177084	0.23808	10	9	34	14	20	4	3.41048	2.08658	2.33788	2.40842	2.48334	0.251251	1.23586	0.00508693	0.052103	0.0313248	0.0646563	0.0270057	0.80331	0.283038	0.0271833	0.44168	0.557256	0.410467
Ear	88	25.9494	29.4514	27.2623	29.2747	25.8536	24.5087	0.92567	n.s.	0.883139	n.s.	0.837197	n.s.	2.92115	3.94433	5.48306	7.08337	3.57963	2.85269	0.115385	0.137647	0.202601	0.246283	0.140188	0.12367	10	9	34	14	20	4	2.17944	0.0766684	2.33735	2.54797	1.35428	1.66446	2.01072	0.0460338	0.939623	0.0345511	0.0340234	0.193185	0.113645	0.0650292	0.107833	0.979814	0.557256	0.342459
Epl	89	24.8282	28.0367	26.3945	27.7938	25.3635	23.9374	0.941428	n.s.	0.91256	n.s.	0.861251	n.s.	2.97552	2.304	4.73569	5.04857	4.33784	3.93732	0.123174	0.0844607	0.180779	0.184888	0.173277	0.174764	9	9	33	14	19	4	2.55776	0.156448	2.12655	1.93986	1.45751	1.44955	1.61579	0.0218116	0.877291	0.043312	0.125326	0.156172	0.159356	0.155934	0.0678141	0.94445	0.557256	0.495014
Epr	90	23.8388	25.6772	25.4563	25.1544	25.6677	24.9421	0.991399	n.s.	1.02041	n.s.	0.991562	n.s.	3.06329	4.09094	4.28071	3.79244	4.67672	2.3895	0.132516	0.163748	0.169395	0.153459	0.18448	0.101789	8	9	34	14	20	4	1.05569	0.307689	0.00552029	0.405424	0.1426	-0.352461	0.135467	0.308236	0.762232	0.995658	0.693945	0.888785	0.726862	0.89562	0.394385	0.921638	0.997258	0.798596
Da	91	23.7872	26.1884	30.2285	30.9845	29.6993	24.8764	1.15427	n.s.	0.958523	n.s.	0.802866	n.s.	1.98607	4.94959	5.22474	5.54727	5.06375	2.8232	0.0861023	0.194906	0.174112	0.182231	0.172632	0.120582	8	8	34	14	20	4	1.27345	-2.09114	-1.68446	0.58354	-2.05499	0.688906	2.98377	0.234101	0.0526509	0.115518	0.57299	0.0644388	0.496885	0.0132225	0.336397	0.44168	0.682494	0.786838
Dp	92	24.1856	28.5952	29.0262	29.926	28.3963	24.7364	1.01507	n.s.	0.948881	n.s.	0.826583	n.s.	3.81511	3.51252	4.61235	5.39816	3.99962	2.69716	0.162672	0.126675	0.160072	0.183604	0.142611	0.115851	8	8	34	14	20	4	2.40505	-0.699139	0.129976	2.10487	-0.292721	0.901237	2.62786	0.0306784	0.492717	0.898348	0.0691567	0.77423	0.376957	0.0241656	0.0819689	0.857327	0.963521	0.410467
MSaaa	93	15.4082	19.0845	18.4054	19.3561	17.7399	17.5074	0.964416	n.s.	0.9165	n.s.	0.90449	n.s.	2.15737	2.0482	3.80258	4.01537	3.59863	1.59108	0.143515	0.110006	0.20812	0.211152	0.205391	0.0965603	10	10	34	14	20	4	3.90802	-0.216692	1.30171	1.53734	0.738865	1.20495	1.3839	0.00103533	0.830611	0.203873	0.166712	0.46603	0.239041	0.188808	0.00894162	0.921638	0.741435	0.577538
MSaap	94	17.2803	18.8463	18.32	19.1477	17.7406	18.0127	0.972074	n.s.	0.926513	n.s.	0.940726	n.s.	2.35633	2.93847	3.13986	3.27408	2.98837	3.42302	0.139769	0.159816	0.17265	0.174044	0.170554	0.201911	10	10	34	14	20	4	1.31475	-0.236153	0.966057	0.428008	0.490043	1.27803	0.590441	0.205866	0.81563	0.346552	0.686847	0.630932	0.212348	0.582138	0.300882	0.921638	0.793506	0.798596
MSapa	95	17.0567	20.2031	18.4189	20.1798	17.1214	17.6942	0.911689	n.s.	0.848441	n.s.	0.876827	n.s.	2.47858	3.96077	3.35521	3.32261	2.802	3.52685	0.148947	0.201494	0.183541	0.16759	0.165809	0.21178	10	9	33	14	19	4	2.04921	0.0146077	2.09861	1.13889	1.23584	2.7899	1.25893	0.0608968	0.988538	0.0577921	0.294765	0.241529	0.00990097	0.267609	0.123877	0.996831	0.557256	0.730572
MSapp	96	18.7779	20.1086	21.0991	21.7614	20.611	21.5887	1.04925	n.s.	0.947137	n.s.	0.992063	n.s.	3.73888	3.77938	3.25007	3.87353	2.71102	3.6602	0.204089	0.193169	0.155206	0.181179	0.133263	0.180139	10	9	33	14	19	4	0.77024	-1.01359	-0.35757	-0.666141	-0.717167	0.95253	0.0821465	0.451886	0.324562	0.726846	0.530043	0.487661	0.351174	0.937653	0.536614	0.76316	0.943113	0.786838
MSpaa	97	14.9106	19.2855	17.9668	19.2473	17.0705	17.3926	0.931621	n.s.	0.886902	n.s.	0.903636	n.s.	2.38129	2.84319	3.73539	4.09453	3.27255	1.26116	0.163697	0.151112	0.209433	0.216531	0.194104	0.0770436	10	10	34	14	20	4	3.73034	0.0269938	1.91078	1.72374	1.19452	1.65359	1.46854	0.0016003	0.978708	0.070055	0.111258	0.246886	0.111261	0.161821	0.0124387	0.996001	0.557256	0.490548
MSpap	98	17.3517	19.6248	19.7798	20.8135	19.0562	18.0575	1.0079	n.s.	0.91557	n.s.	0.867586	n.s.	1.2974	1.74391	3.22381	3.07474	3.2006	4.92226	0.0766404	0.0910841	0.164184	0.150367	0.170056	0.289626	10	10	34	14	20	4	3.30707	-1.2011	0.629347	0.62142	-0.198455	1.61261	1.06216	0.00426785	0.242991	0.534284	0.574562	0.844104	0.117718	0.352584	0.023542	0.741762	0.902015	0.786838
MSppa	99	16.8	18.7798	19.4433	20.5819	18.6043	17.2229	1.03533	n.s.	0.903915	n.s.	0.836797	n.s.	2.21966	2.04921	2.92778	3.36667	2.3025	3.45364	0.135425	0.111845	0.151721	0.166495	0.12539	0.213059	10	10	33	14	19	4	2.07242	-1.62522	0.209921	0.844137	-0.804784	1.8954	1.72508	0.0529593	0.118624	0.835809	0.447507	0.429842	0.0714711	0.147942	0.120747	0.577808	0.950897	0.785997
MSppp	100	17.1126	21.2695	20.9818	21.5698	20.5794	19.8075	0.986471	n.s.	0.954083	n.s.	0.918297	n.s.	2.56581	2.7914	3.1832	3.57235	2.91932	1.5567	0.153685	0.13452	0.152898	0.168803	0.143723	0.0835033	10	10	32	13	19	4	3.4671	-0.226315	0.622816	1.24229	0.274874	0.828163	1.39872	0.00277365	0.823147	0.540745	0.242182	0.786728	0.416331	0.18634	0.0189717	0.921638	0.902015	0.730572
Caaa	101	21.2349	25.3551	21.2434	21.3387	21.1874	20.2909	0.837837	n.s.	0.992907	n.s.	0.950894	n.s.	1.62872	3.64228	2.94273	3.49859	2.67916	2.1197	0.0794394	0.150833	0.139807	0.168054	0.12831	0.110995	7	5	27	10	17	4	2.36616	2.03972	2.37654	2.60595	2.38424	0.117973	0.683939	0.0627317	0.0765923	0.0602009	0.0372973	0.0626899	0.907628	0.510546	0.124734	0.515664	0.557256	0.342459
Caap	102	28.9131	35.2332	28.3637	29.2567	27.8829		0.805027	n.s.	0.953043	n.s.			1.78443	4.99729	3.46492	4.71617	2.67811		0.0655742	0.150699	0.123687	0.166957	0.0978955		4	4	20	7	13		2.38212	1.9472	2.81979		2.62596	0.711406		0.0800724	0.0990649	0.0549675		0.0650927	0.496707		0.14883	0.574577	0.557256
Capa	103				35.037	33.0598				0.943569	n.s.						4.44875	2.76691					0.133322	0.0863094					5	8							0.891806							0.40701
Capp	104	22.8499	30.0044	26.7951	26.8592	26.739		0.89304	n.s.	0.995525	n.s.			4.40564	4.3905	2.96996	3.09923	3.06603		0.204858	0.155474	0.112687	0.119509	0.118248		4	4	15	7	8		2.30054	1.26401	1.33372		1.38013	0.075316		0.0610556	0.264602	0.245464		0.243827	0.941137		0.123877	0.754604	0.793506
Cpaa	105	20.2114	21.4044	20.5741	20.4839	20.6237	23.6251	0.961209	n.s.	1.00682	n.s.	1.15335	n.s.	1.72406	3.16185	3.40649	3.88219	3.22223	2.52142	0.0879672	0.152336	0.166907	0.193831	0.158192	0.113397	8	8	31	11	20	4	0.937003	0.56869	0.587007	-1.31795	0.651538	-0.101688	-1.8259	0.369192	0.577132	0.567115	0.226017	0.527419	0.920149	0.103081	0.464205	0.913796	0.902015	0.707214
Cpap	106	20.792	24.0615	22.7756	23.7643	22.1714	23.9195	0.946558	n.s.	0.932971	n.s.	1.00653	n.s.	3.0177	2.96857	3.36962	3.84467	2.99786	1.97151	0.149673	0.127781	0.149224	0.165461	0.137091	0.0875743	8	7	29	11	18	4	2.11162	0.18422	1.42544	0.0950753	1.00093	1.17333	-0.101994	0.0549831	0.856271	0.181569	0.926434	0.340229	0.256478	0.920626	0.123712	0.937082	0.741435	0.946604
Cppa	107	24.251	27.5498	27.568	27.6153	27.5365		1.00066	n.s.	0.997146	n.s.			3.95951	2.89993	2.86052	3.3131	2.73062		0.173476	0.11184	0.105492	0.124972	0.101918		4	4	15	6	9		1.34429	-0.0329996	0.00782149		-0.0111475	0.0483495		0.231646	0.974569	0.994035		0.991564	0.962454		0.335691	0.996001	0.997258
Cppp	108				31.9296	32.4495				1.01628	n.s.						5.34001	2.47459					0.174212	0.078378					6	9							-0.223052							0.830392
ABalaaaa	109	20.0845	29.4195	23.0617	22.2654	23.7443		0.783893	n.s.	1.06642	n.s.			2.16386	2.29303	6.2474	2.4448	8.47948		0.114471	0.082814	0.276109	0.114378	0.369871		4	4	13	6	7		5.92166	4.70636	1.66729		3.06001	-0.440566		0.0010458	0.00228354	0.137117		0.00845537	0.672559		0.00894162	0.280833	0.727134
ABalaaap	110	18.9408	22.857	19.7402	19.0144	20.466		0.863639	n.s.	1.07635	n.s.			1.55918	3.31601	3.21473	1.82424	4.22306		0.0874637	0.15233	0.16576	0.0993663	0.213714		4	5	14	7	7		2.33748	2.34964	1.09741		1.81858	-0.834903		0.0586594	0.0590182	0.298601		0.112436	0.427528		0.123877	0.446485	0.793506
ABalaapa	111	22.1214	26.5901	22.3549	22.0178	22.6078		0.840726	n.s.	1.02679	n.s.			2.36516	3.63558	3.96643	2.9848	4.76273		0.1136	0.145272	0.180598	0.141211	0.217251		4	4	14	6	8		2.06063	2.08927	1.60715		2.01259	-0.283818		0.092681	0.084816	0.147297		0.097633	0.781492		0.163241	0.522648	0.741435
ABalaapp	112	20.9653	24.7487	22.1461	21.4811	22.728		0.894838	n.s.	1.05805	n.s.			2.76929	2.69525	3.99815	4.70988	3.48241		0.140345	0.115711	0.183544	0.227088	0.158009		4	4	15	7	8		1.95812	1.46353	1.10702		1.53315	-0.576099		0.0979854	0.177496	0.301349		0.168897	0.576184		0.167555	0.643422	0.793506
ABalapaa	113	20.2795	21.0831	23.0858	21.9915	24.18		1.09499	n.s.	1.09952	n.s.			1.69629	3.83583	3.07227	3.46475	2.37747		0.0888731	0.19331	0.135457	0.163176	0.101835		4	4	14	7	7		0.383187	-0.391139	-1.4622		-0.959904	-1.378		0.720491	0.709618	0.211838		0.389414	0.196531		0.760518	0.921638	0.741435
ABalapap	114	17.962	20.3355	20.9184	21.0652	20.79		1.02867	n.s.	0.986935	n.s.			1.94548	3.67228	2.86761	2.84099	3.08023		0.113726	0.189614	0.13937	0.139683	0.152789		5	5	15	7	8		1.27708	-0.37189	-0.230648		-0.323587	0.179949		0.248164	0.720584	0.823782		0.757745	0.859978		0.353634	0.921638	0.950897
ABalappa	115	21.4624	21.6807	21.7463	20.6094	22.8832		1.00303	n.s.	1.11033	n.s.			1.63626	1.50268	3.62309	2.91805	4.11223		0.0810038	0.0736413	0.169582	0.146645	0.186123		4	4	14	7	7		0.196539	0.802708	-0.696587		-0.0535747	-1.19306		0.850722	0.442848	0.50525		0.95809	0.258349		0.887033	0.835446	0.902015
ABalappp	116	16.5255	18.8154	18.235	17.2029	19.0377		0.969154	n.s.	1.10665	n.s.			0.351242	4.39208	4.10061	3.87895	4.31122		0.0223173	0.245102	0.22839	0.233535	0.232747		5	5	16	7	9		1.1621	0.657861	-0.091355		0.261946	-0.893722		0.30905	0.529018	0.929391		0.801654	0.386979		0.394385	0.887316	0.970511
ABalpaaa	117	19.9645	23.6157	20.5436	19.4344	21.4063		0.869916	n.s.	1.10146	n.s.			1.90086	4.39509	3.85565	3.57386	4.04729		0.101162	0.197741	0.190613	0.190461	0.194322		4	4	16	7	9		1.52496	1.62094	0.856782		1.2802	-1.0329		0.200513	0.162482	0.427944		0.266116	0.319531		0.295583	0.601528	0.853382
ABalpaap	118	18.6291	18.4135	18.0012	16.4541	19.2389		0.977609	n.s.	1.16925	n.s.			3.28264	3.10345	3.01461	3.08476	2.43618		0.182503	0.176969	0.169793	0.193336	0.129793		7	5	18	8	10		-0.115827	1.11007	-0.519986		0.264426	-2.0856		0.910311	0.297065	0.620133		0.799929	0.057009		0.918915	0.754604	0.9042
ABalpapa	119	16.4547	18.1901	17.6136	16.6748	18.4482		0.96831	n.s.	1.10635	n.s.			2.49289	3.51852	2.85523	2.9216	2.67785		0.157813	0.203103	0.164487	0.180686	0.149187		6	5	17	8	9		0.926021	0.805036	-0.142669		0.335302	-1.29902		0.385003	0.445876	0.890781		0.749501	0.214418		0.480551	0.835446	0.962264
ABalpapp	120	17.8642	21.0443	17.8645	16.745	18.6108		0.848901	n.s.	1.11142	n.s.			2.65899	3.01773	3.81703	3.15016	4.16317		0.153496	0.150569	0.216337	0.194004	0.228357		8	5	20	8	12		1.9335	2.45698	1.34661		1.99132	-1.13867		0.0902796	0.0365195	0.206543		0.0835692	0.270102		0.162503	0.44168	0.741435
ABalppaa	121	21.3647	22.3083	22.9104	22.9687	22.8593		1.02699	n.s.	0.995236	n.s.			3.21752	3.25384	3.03452	3.41751	2.89817		0.160012	0.154974	0.134659	0.154104	0.130745		4	4	15	7	8		0.412392	-0.317928	-0.286592		-0.333429	0.0663609		0.694384	0.760285	0.784943		0.753774	0.948193		0.742122	0.921638	0.950897
ABalppap	122	17.6179	22.6238	19.4246	18.902	19.831		0.85859	n.s.	1.04915	n.s.			3.5207	2.24694	2.95172	3.2379	2.83697		0.212326	0.104283	0.154332	0.177417	0.147031		4	5	16	7	9		2.46962	2.35037	2.02396		2.56614	-0.600691		0.0577161	0.0406154	0.0699165		0.0309225	0.559152		0.123877	0.44168	0.557256
ABalpppa	123	19.178	23.8886	20.3858	19.3924	21.2688		0.853369	n.s.	1.09676	n.s.			1.44783	4.52928	4.55078	4.93659	4.26982		0.0792689	0.19908	0.226516	0.262519	0.206332		5	5	17	8	9		2.21515	1.68159	1.05824		1.5185	-0.83319		0.0797408	0.126084	0.321018		0.175356	0.418734		0.14883	0.577808	0.793506
ABalpppp	124	19.584	22.1911	19.682	18.8038	20.2675		0.886932	n.s.	1.07784	n.s.			0.919969	2.2845	3.16232	3.20106	3.1333		0.0489328	0.108094	0.162679	0.175555	0.157818		6	5	20	8	12		2.39512	2.22167	1.40972		2.01939	-1.01032		0.0611989	0.048955	0.187808		0.0766581	0.328444		0.123877	0.44168	0.741435
ABaraaaa	125	22.3644	24.1485	23.1404	23.0422	23.2386		0.958251	n.s.	1.00852	n.s.			1.80145	5.93683	3.54798	3.65235	3.72989		0.0855843	0.261212	0.156062	0.164168	0.166237		4	4	14	7	7		0.575156	0.337961	0.276913		0.323531	-0.0995402		0.59967	0.751127	0.794392		0.76404	0.922354		0.67022	0.921638	0.950897
ABaraaap	126	18.6264	19.5724	18.9647	18.3033	19.5527		0.968955	n.s.	1.06826	n.s.			2.41627	2.29939	3.14606	3.3324	3.04174		0.135128	0.123356	0.16833	0.187755	0.159888		6	5	17	8	9		0.663824	0.811523	0.0136045		0.474517	-0.803809		0.523826	0.434619	0.989399		0.646508	0.434639		0.601169	0.835446	0.997258
ABaraapa	127	17.7176	21.6132	18.6601	17.7268	19.4068		0.863367	n.s.	1.09477	n.s.			2.40392	3.96652	2.51069	2.16436	2.62095		0.142463	0.194994	0.136417	0.125911	0.13843		5	4	18	8	10		1.72682	1.82825	1.02648		1.42683	-1.48933		0.148296	0.142929	0.361396		0.235269	0.155887		0.226416	0.577808	0.793506
ABaraapp	128	17.2905	18.0688	19.2322	19.636	18.9181		1.06439	n.s.	0.96344	n.s.			2.27102	3.23757	2.40768	2.91834	2.05621		0.136817	0.188139	0.127146	0.15393	0.111709		6	5	16	7	9		0.452684	-0.861005	-0.530165		-0.741933	0.552811		0.664454	0.413823	0.615517		0.488805	0.592111		0.728344	0.830841	0.9042
ABarapaa	129	20.7657	19.8759	20.6083	20.4532	20.7634		1.03685	n.s.	1.01517	n.s.			4.11795	2.1085	3.41321	3.81846	3.21382		0.208221	0.111387	0.168211	0.192527	0.15962		5	5	16	8	8		-0.43007	-0.350575	-0.601052		-0.57591	-0.175787		0.682254	0.732565	0.560088		0.57604	0.863051		0.738389	0.921638	0.902015
ABarapap	130	18.0099	19.0424	18.7636	17.4396	19.9406		0.985363	n.s.	1.14341	n.s.			3.12123	2.8151	3.55617	2.69974	3.95016		0.180527	0.155225	0.192312	0.159643	0.203599		6	5	17	8	9		0.576398	1.01449	-0.493051		0.182646	-1.53785		0.578611	0.338856	0.631695		0.859518	0.146141		0.650938	0.786146	0.9042
ABarappa	131	19.5139	27.0083	22.9417	21.1966	24.6869		0.849431	n.s.	1.16467	n.s.			2.11062	2.59249	3.73746	2.54285	4.08567		0.113568	0.101988	0.16582	0.12425	0.17141		5	4	14	7	7		4.67381	3.60156	1.15141		2.485	-1.91893		0.00373059	0.0105522	0.280059		0.0416804	0.0838359		0.0226821	0.306014	0.793506
ABarappp	132	18.6814	22.6711	22.4831	21.5187	23.2332		0.991709	n.s.	1.07967	n.s.			2.82303	1.9951	3.01567	3.21447	2.80278		0.15867	0.0924021	0.136226	0.154715	0.123988		5	5	16	7	9		2.58074	0.764458	-0.435089		0.160922	-1.1186		0.0355758	0.462429	0.671926		0.875254	0.285136		0.0921736	0.838153	0.925883
ABarpaaa	133	23.8773	26.9822	25.4322	26.6972	24.4834		0.942555	n.s.	0.917078	n.s.			4.11994	4.1338	4.76162	4.28005	5.15963		0.18333	0.16278	0.190572	0.166999	0.217325		4	4	14	6	8		1.06397	0.105295	0.906405		0.638578	0.876382		0.328275	0.919202	0.392785		0.548643	0.398292		0.415815	0.975251	0.808674
ABarpaap	134	18.1024	21.1302	18.9561	18.3359	19.4072		0.897111	n.s.	1.05842	n.s.			2.16347	2.75727	3.15862	4.03024	2.46106		0.123781	0.13515	0.16882	0.226669	0.129694		7	7	19	8	11		2.2857	1.58285	1.3468		1.71278	-0.666815		0.0424012	0.138687	0.203331		0.111927	0.518936		0.105081	0.577808	0.741435
ABarpapa	135	19.7663	23.4345	20.2104	18.7099	21.9252		0.862419	n.s.	1.17185	n.s.			3.24441	3.20134	3.9364	3.67221	3.74031		0.172345	0.145146	0.198017	0.202405	0.176687		5	4	15	8	7		1.6979	2.29239	0.706727		1.70041	-1.67517		0.135867	0.0558446	0.5017		0.14249	0.118395		0.213149	0.44168	0.902015
ABarpapp	136	16.7491	21.9084	20.2509	18.7838	21.555		0.924346	n.s.	1.14753	n.s.			1.94513	2.04561	4.01919	3.92154	3.84524		0.12194	0.0980399	0.201388	0.215296	0.183347		5	5	17	8	9		4.08692	1.88103	0.224392		1.23983	-1.46767		0.0035193	0.087108	0.826228		0.235716	0.163279		0.0222889	0.522648	0.950897
ABarppaa	137	21.2888	28.0148	24.5731	24.0907	24.9951		0.877147	n.s.	1.03754	n.s.			2.55195	3.14715	2.53255	2.64626	2.52765		0.127365	0.117956	0.10478	0.113769	0.104286		4	5	15	7	8		3.54045	2.27265	1.81122		2.21769	-0.674291		0.00949639	0.0537287	0.111797		0.0696699	0.512357		0.0395622	0.44168	0.682494
ABarppap	138	24.5084	29.3275	26.054	25.071	26.914		0.88838	n.s.	1.07351	n.s.			2.3215	4.16299	3.24074	4.35648	1.71044		0.100643	0.15082	0.126459	0.179972	0.0655378		4	4	15	7	8		2.02207	1.60377	1.11344		1.45919	-1.05066		0.102708	0.155174	0.335772		0.217845	0.325634		0.172187	0.586963	0.793506
ABarpppa	139	20.2421	21.331	19.8374	19.1208	20.554		0.92998	n.s.	1.07495	n.s.			3.40044	2.43584	3.58343	2.49121	4.48737		0.178488	0.119902	0.183462	0.134359	0.225144		4	5	16	8	8		0.539275	1.57771	0.403747		1.05898	-0.789778		0.61158	0.149884	0.694198		0.314473	0.446437		0.674711	0.579552	0.936171
ABarpppp	140	22.7386	22.9355	22.0721	24.2088	20.2025		0.962357	n.s.	0.834511	n.s.			2.1622	2.71366	4.4932	4.03605	4.22551		0.101032	0.125712	0.206962	0.172673	0.215694		4	4	15	7	8		0.113466	-0.6237	1.3542		0.483617	1.87633		0.913541	0.549102	0.208662		0.641513	0.0834568		0.918915	0.892933	0.741435
ABplaaaa	141	17.6708	20.5604	20.8572	18.7762	22.9383		1.01444	n.s.	1.22167	n.s.			2.5765	2.79864	4.06185	2.85402	4.16049		0.153096	0.142924	0.197788	0.156752	0.187046		5	5	16	8	8		1.69854	1.10983	-1.2312		-0.184165	-2.33332		0.128093	0.29657	0.244267		0.857617	0.0372188		0.202814	0.754604	0.793506
ABplaaap	142	18.9736	19.72	19.571	18.3353	20.8066		0.992442	n.s.	1.13478	n.s.			1.1539	2.34355	4.09003	4.07565	3.96808		0.0638571	0.124784	0.21225	0.22923	0.196673		5	5	16	8	8		0.638899	0.777126	-0.620497		0.101786	-1.22882		0.547144	0.453495	0.547573		0.920571	0.23941		0.619613	0.838153	0.902015
ABplaapa	143	17.9641	20.5547	20.2458	19.1777	21.3139		0.984974	n.s.	1.11139	n.s.			1.95744	2.09367	3.96504	4.0304	3.8519		0.112369	0.106103	0.198905	0.216728	0.18637		8	6	16	8	8		2.35552	0.828677	-0.472221		0.235967	-1.08379		0.0391633	0.42497	0.645857		0.816253	0.296807		0.0999541	0.830841	0.9042
ABplaapp	144	16.9568	17.766	17.3847	17.0527	17.606		0.978536	n.s.	1.03244	n.s.			2.8636	3.00329	3.06822	3.36768	2.98492		0.174153	0.175085	0.178696	0.203658	0.173073		8	7	20	8	12		0.531971	0.433581	0.11229		0.287495	-0.376417		0.604043	0.671707	0.91236		0.779209	0.712316		0.670723	0.921638	0.963521
ABplapaa	145	23.1333	25.0281	22.2685	21.7496	22.7874		0.889739	n.s.	1.04772	n.s.			3.71047	5.52219	3.27158	4.12469	2.30371		0.168415	0.231671	0.149211	0.19557	0.104255		5	5	16	8	8		0.636841	1.14313	0.861676		1.06078	-0.621306		0.544483	0.29161	0.429129		0.338159	0.54708		0.619613	0.754604	0.853382
ABplapap	146	20.4622	24.9663	21.3078	21.6922	20.9233		0.853463	n.s.	0.964553	n.s.			2.16235	7.48957	3.96268	3.59502	4.51518		0.109449	0.314987	0.188879	0.170907	0.22254		7	5	16	8	8		1.30639	0.913898	1.08963		1.04742	0.376822		0.25446	0.401354	0.318706		0.345543	0.712236		0.359609	0.830841	0.793506
ABplappa	147	18.7598	22.1763	21.9675	21.692	22.243		0.990583	n.s.	1.0254	n.s.			2.81211	5.03743	3.39273	4.53569	1.97983		0.157396	0.236618	0.156857	0.215629	0.0917906		5	6	16	8	8		1.41729	0.185715	-0.0306812		0.0938756	-0.314889		0.19399	0.856299	0.976493		0.927922	0.759601		0.290901	0.937082	0.997258
ABplappp	148	22.834	27.3664	26.6592	25.3668	27.7901		0.97416	n.s.	1.09553	n.s.			3.80772	3.25964	4.13116	3.05358	4.79676		0.177179	0.126555	0.157545	0.124676	0.178001		4	4	15	7	8		1.80847	1.00122	-0.180134		0.36304	-1.18126		0.1217	0.355324	0.861191		0.729249	0.260406		0.198198	0.80294	0.951473
ABplpaaa	149	16.262	21.4024	19.8258	19.0299	20.6218		0.926337	n.s.	1.08365	n.s.			1.57727	4.54692	4.13494	3.81971	4.53869		0.103053	0.223071	0.211822	0.206994	0.22697		4	5	16	8	8		2.35688	0.971923	0.301366		0.69114	-0.758999		0.0636189	0.36148	0.770276		0.514418	0.460803		0.12481	0.804151	0.950897
ABplpaap	150	18.0956	21.3755	20.7043	20.8791	20.5684		0.968603	n.s.	0.985117	n.s.			2.02304	2.95426	3.1991	3.91731	2.76272		0.118784	0.145119	0.156928	0.194319	0.13805		4	5	16	7	9		1.97111	0.250124	0.501148		0.434558	0.178216		0.0899306	0.807594	0.629932		0.676592	0.861985		0.162503	0.921638	0.9042
ABplpapa	151	15.7516	20.1712	19.5981	19.1556	19.9422		0.971585	n.s.	1.04106	n.s.			0.745396	3.85059	2.90209	2.4187	3.33159		0.0502797	0.20044	0.150394	0.130775	0.171703		4	5	16	7	9		2.50845	0.520903	0.111791		0.30673	-0.546795		0.060937	0.620392	0.913969		0.770326	0.593149		0.123877	0.921638	0.963521
ABplpapp	152	17.7131	18.9563	18.7755	18.384	19.0602		0.990459	n.s.	1.03678	n.s.			2.72279	3.05905	3.02097	3.44985	2.80792		0.160121	0.169442	0.163017	0.193519	0.150667		6	5	19	8	11		0.705304	0.312279	-0.0645625		0.11793	-0.455449		0.500222	0.761597	0.950272		0.909837	0.656176		0.585876	0.921638	0.98401
ABplppaa	153	19.2506	25.04	21.7315	21.4851	21.9163		0.867872	n.s.	1.02007	n.s.			2.63038	4.83485	3.62748	4.22346	3.40664		0.143471	0.205153	0.169903	0.204767	0.160296		5	4	14	6	8		2.15343	1.19722	1.15655		1.27026	-0.205042		0.0913143	0.277019	0.304499		0.272556	0.841883		0.162654	0.754604	0.793506
ABplppap	154	20.7155	22.3809	21.4027	21.399	21.406		0.956294	n.s.	1.00033	n.s.			0.754895	4.25353	5.07193	6.7241	3.56293		0.0387186	0.20193	0.240926	0.325448	0.171647		4	4	15	7	8		0.77101	0.296298	0.394412		0.391647	-0.00246666		0.493802	0.773909	0.708936		0.709947	0.998087		0.582346	0.921638	0.936171
ABplpppa	155	18.2376	22.5076	20.7819	19.7843	21.5577		0.923325	n.s.	1.08963	n.s.			1.90087	2.12398	4.16125	5.21567	3.24304		0.110743	0.100265	0.203363	0.273041	0.154614		4	4	16	7	9		2.99614	1.21619	0.626857		1.16086	-0.78876		0.0244883	0.256428	0.546551		0.27339	0.449475		0.0697915	0.744775	0.902015
ABplpppa.1	156	18.2376	22.5076	20.7819	19.7843	21.5577		0.923325	n.s.	1.08963	n.s.			1.90087	2.12398	4.16125	5.21567	3.24304		0.110743	0.100265	0.203363	0.273041	0.154614		4	4	16	7	9		2.99614	1.21619	0.626857		1.16086	-0.78876		0.0244883	0.256428	0.546551		0.27339	0.449475		0.0697915	0.744775	0.902015
ABplpppp	157	16.8728	21.352	21.2644	20.3152	22.0027		0.995898	n.s.	1.08307	n.s.			2.4836	1.76891	3.65074	4.27571	3.14273		0.156395	0.0880231	0.174365	0.217986	0.146801		4	4	16	7	9		2.93799	0.562807	-0.474636		0.0689095	-0.876251		0.0293395	0.58795	0.645275		0.946365	0.400162		0.0809203	0.913796	0.9042
ABpraaaa	158	20.1027	22.1815	22.7194	21.0791	24.3597		1.02425	n.s.	1.15563	n.s.			1.66567	1.41855	3.84224	3.37668	3.78232		0.0880365	0.0679493	0.172137	0.165912	0.160815		4	4	14	7	7		1.90023	0.754983	-1.36495		-0.43105	-1.71188		0.107369	0.470356	0.208074		0.672868	0.112941		0.178253	0.843731	0.741435
ABpraaap	159	19.3514	21.2527	20.3914	18.1673	22.9331		0.959472	n.s.	1.26232	n.s.			2.47987	2.45873	4.25113	3.57495	3.62296		0.134557	0.122921	0.211952	0.202928	0.163622		5	4	15	8	7		1.14831	1.74985	-0.913147		0.522624	-2.55741		0.290783	0.115698	0.3863		0.614538	0.0242296		0.391527	0.577808	0.808674
ABpraapa	160	18.0547	21.7174	20.0962	17.9374	21.9852		0.92535	n.s.	1.22566	n.s.			2.19956	2.21717	3.69331	3.40158	2.93683		0.127919	0.108473	0.186844	0.196409	0.137757		5	4	15	7	8		2.47134	2.22664	-0.17628		1.10866	-2.44932		0.0450931	0.0541085	0.864481		0.299299	0.0306271		0.107833	0.44168	0.951473
ABpraapp	161	19.7504	19.7864	20.0794	18.824	21.0837		1.01481	n.s.	1.12004	n.s.			2.70385	3.13281	3.64338	3.87721	3.29542		0.141791	0.166248	0.183969	0.212408	0.16021		7	5	18	8	10		0.0207915	0.491007	-0.742936		-0.17827	-1.31228		0.983928	0.633959	0.477562		0.86334	0.210782		0.983928	0.921638	0.902015
ABprapaa	162	21.8845	20.1436	20.4911	20.336	20.6117		1.01725	n.s.	1.01355	n.s.			2.39238	3.72686	3.85397	3.22628	4.47275		0.116151	0.194265	0.191019	0.164315	0.223029		4	5	16	7	9		-0.848575	-0.0931504	-0.209289		-0.180465	-0.143113		0.425049	0.928098	0.838501		0.861963	0.888247		0.515486	0.978722	0.950897
ABprapap	163	16.6683	21.2378	19.0161	18.1853	19.8468		0.895388	n.s.	1.09137	n.s.			2.08515	1.71532	3.17147	2.79044	3.49131		0.130309	0.0848057	0.169385	0.15824	0.18141		6	5	16	8	8		3.98765	2.44257	0.957083		2.01385	-1.05151		0.00316931	0.0326884	0.359715		0.065006	0.311685		0.0208443	0.44168	0.793506
ABprappa	164	20.9286	22.5402	21.5851	21.2987	21.8714		0.957624	n.s.	1.02689	n.s.			2.14823	1.94385	3.25817	2.81819	3.85578		0.107778	0.0916291	0.153641	0.137043	0.182589		5	4	14	7	7		1.17931	0.861001	0.381805		0.731958	-0.317271		0.2777	0.413018	0.71149		0.483914	0.756985		0.382957	0.830841	0.936171
ABprappp	165	21.8971	26.4933	24.0813	25.197	23.1251		0.908958	n.s.	0.917771	n.s.			1.51612	3.57054	4.30334	1.98924	5.6061		0.0735658	0.143195	0.182137	0.0822372	0.251084		4	4	13	6	7		2.36973	0.660973	1.21566		1.12318	0.913058		0.0760793	0.542669	0.255939		0.304405	0.38893		0.144551	0.890796	0.793506
ABprpaaa	166	18.7792	23.2231	19.6035	19.2269	20.0339		0.844137	n.s.	1.04198	n.s.			2.45474	3.55139	3.57567	3.5317	3.8569		0.137252	0.162483	0.18544	0.189426	0.199394		5	4	15	8	7		2.12871	1.84095	1.38815		1.80858	-0.420472		0.0847747	0.114702	0.208555		0.133169	0.68137		0.155876	0.577808	0.741435
ABprpaap	167	19.4499	21.8032	20.4304	19.5301	21.2182		0.937035	n.s.	1.08644	n.s.			1.95807	2.15185	3.68265	3.42193	3.94551		0.105706	0.104862	0.183258	0.181471	0.19176		5	4	15	7	8		1.69645	1.35116	0.332088		0.956092	-0.887428		0.138836	0.210451	0.74685		0.36568	0.390972		0.215826	0.692019	0.943113
ABprpapa	168	20.643	20.887	19.6357	17.3867	21.8847		0.940092	n.s.	1.25871	n.s.			3.26023	2.44362	6.05424	7.24875	3.79977		0.165831	0.122842	0.313146	0.429943	0.179053		5	5	16	8	8		0.133905	1.25635	-0.576121		0.670275	-1.55448		0.89704	0.239814	0.57619		0.511585	0.149461		0.918915	0.741762	0.902015
ABprpapp	169	18.0275	20.0994	20.0604	20.8143	19.5326		0.998061	n.s.	0.938421	n.s.			2.243	3.49227	3.96104	4.23367	3.8977		0.130642	0.182438	0.200359	0.210666	0.204537		5	5	17	7	10		1.11618	-0.319757	0.284861		0.021258	0.634569		0.30212	0.755941	0.782208		0.983606	0.5373		0.394385	0.921638	0.950897
ABprppaa	170	23.7276	23.0469	21.5551	20.3076	22.6244		0.935274	n.s.	1.11408	n.s.			1.93265	2.5685	3.75013	1.85753	4.72879		0.0865421	0.118412	0.177324	0.0952808	0.216477		4	4	13	6	7		-0.423569	1.83664	0.191954		0.902658	-1.19326		0.687738	0.124705	0.85204		0.395037	0.26678		0.739643	0.577808	0.950897
ABprppap	171	22.5113	24.405	22.0307	21.8869	22.1745		0.902714	n.s.	1.01314	n.s.			2.98782	2.9875	3.13907	2.4897	3.88624		0.141021	0.130065	0.14503	0.117816	0.181517		4	4	14	7	7		0.896362	1.42631	1.06468		1.38585	-0.164875		0.404586	0.208688	0.318442		0.223607	0.87226		0.501335	0.692019	0.793506
ABprpppa	172	21.3791	23.2439	21.42	22.3858	20.6957		0.921531	n.s.	0.924502	n.s.			2.36984	3.94709	3.63792	2.78091	4.20182		0.116391	0.180425	0.17287	0.129403	0.209374		5	4	14	6	8		0.832479	0.376919	1.0316		0.82904	0.903924		0.445465	0.721741	0.339257		0.448193	0.383988		0.532689	0.921638	0.793506
ABprpppp	173	19.8393	24.0861	21.3646	19.7209	22.8029		0.887012	n.s.	1.15628	n.s.			3.46052	2.38446	4.00225	2.88814	4.45202		0.183148	0.105185	0.190453	0.151681	0.201341		5	4	15	7	8		2.17383	2.70038	0.649869		1.7249	-1.60892		0.0667368	0.0286977	0.530706		0.121873	0.133418		0.128225	0.44168	0.902015
MSaaaa	174	15.8299	19.2062	17.3266	17.4909	17.1829		0.902138	n.s.	0.982396	n.s.			2.26357	3.88656	3.10734	3.95044	2.42571		0.15193	0.215007	0.182328	0.233924	0.145581		4	4	15	7	8		1.50135	0.699946	0.952514		0.894008	0.178821		0.195635	0.508367	0.392215		0.420871	0.861755		0.290901	0.8758	0.808674
MSaaap	175	17.1738	19.3155	19.0107	19.3009	18.7205		0.984219	n.s.	0.969928	n.s.			3.91374	2.84645	2.81052	2.99514	2.81908		0.242134	0.156576	0.150479	0.160724	0.155966		4	4	14	7	7		0.885135	0.00803279	0.334682		0.189412	0.373349		0.413232	0.993826	0.748705		0.857489	0.715424		0.508365	0.996831	0.943113
MSaapa	176	16.5918	19.1029	17.5357	17.1689	17.8566		0.917958	n.s.	1.04006	n.s.			1.30199	1.55627	3.50573	4.40589	2.77295		0.0833759	0.086559	0.203252	0.265786	0.160142		4	4	15	7	8		2.47513	1.05219	0.995722		1.31297	-0.355892		0.0493628	0.322973	0.343682		0.213886	0.729415		0.114068	0.76316	0.793506
MSaapp	177				25.2717	22.0607				0.872939	n.s.						4.3999	3.54773					0.182809	0.167518					5	6							1.31425							0.226559
MSapaa	178				20.0145	20.9168				1.04508	n.s.						2.29736	5.13994					0.120524	0.25451					5	7							-0.410556							0.691221
MSapap	179				18.9443	20.1921				1.06587	n.s.						3.64867	2.65596					0.20223	0.136232					5	7							-0.651319							0.535809
MSappa	180				22.3112	21.3967				0.959011	n.s.						4.24292	2.7903					0.199679	0.135066					5	7							0.421267							0.687255
MSappp	181				23.0488	22.7795				0.988316	n.s.						4.63448	4.32554					0.21364	0.196669					4	7							0.0949605							0.927444
MSpaaa	182	16.4466	18.7364	17.8131	17.9737	17.6725		0.950722	n.s.	0.98324	n.s.			1.89912	3.48734	3.71689	3.92704	3.78993		0.122689	0.197759	0.212138	0.226291	0.221155		4	4	15	7	8		1.15328	0.333051	0.483789		0.463894	0.150645		0.304772	0.748758	0.644166		0.662239	0.882642		0.394385	0.921638	0.9042
MSpaap	183				20.4456	20.8378				1.01918	n.s.						3.07402	3.14075					0.156616	0.156107					6	7							-0.227007							0.824671
MSpapa	184	18.4143	19.8788	17.7507	17.2821	18.1607		0.892947	n.s.	1.05084	n.s.			0.729795	3.87347	2.96605	2.87707	3.17618		0.042109	0.207033	0.16988	0.172423	0.180358		4	4	15	7	8		0.743077	1.16907	0.767417		1.02181	-0.562079		0.508046	0.295632	0.476785		0.364766	0.583643		0.589484	0.754604	0.902015
MSpapp	185	21.7434	22.6105	23.0446				1.0192	n.s.					3.45567	1.87061	5.13313				0.168863	0.0879024	0.228317				4	4	10				0.44137		-0.49789		-0.231671			0.678833		0.632322		0.820697			0.738389		0.9042
MSppaa	186				21.4579	21.7828				1.01514	n.s.						2.43245	5.95276					0.118082	0.283038					6	7							-0.13211							0.898084
MSppap	187				22.5481	20.2473				0.897959	n.s.						3.27055	4.58127					0.151091	0.234347					6	7							1.05226							0.31584
MSpppa	188				20.9395	21.1952				1.01221	n.s.						2.9287	6.83245					0.146858	0.333872					5	7							-0.0883104							0.931646
MSpppp	189				22.903	25.784				1.12579	n.s.						4.53003	5.63993					0.207682	0.22655					5	7							-0.97965							0.350885
Eala	190
Ealp	191
Eara	192
Earp	193
Epla	194
Eplp	195
Epra	196
Eprp	197
Z2	198				29.0771	33.1314				1.13943	n.s.						4.18796	7.14306					0.153031	0.226378					4	5							-1.06144							0.32599
Z3	199
Daa	200
Dap	201
Dpa	202
[truncated: 7 more columns]

## Sheet: Positional deviation - pOV
	Order	WT.mean	C.mean	EQ.mean	EA.mean	ED.mean	INV.mean	EQ.over.C	EQ.C.sign	ED.over.EA	ED.EA.sign	INV.over.EA	INV.EA.sign	WT.sd	C.sd	EQ.sd	EA.sd	ED.sd	INV.sd	WT.vc	C.vc	EQ.vc	EA.vc	ED.vc	INV.vc	WT.n	C.n	EQ.n	EA.n	ED.n	INV.n	C.vs.WT.t.stat	C.vs.EA.t.stat	C.vs.ED.t.stat	C.vs.INV.t.stat	C.vs.EQ.t.stat	EA.vs.ED.t.stat	EA.vs.INV.t.stat	C.vs.WT.p.val	C.vs.EA.p.val	C.vs.ED.p.val	C.vs.INV.p.val	C.vs.EQ.p.val	EA.vs.ED.p.val	EA.vs.INV.p.val	C.vs.WT.p.adj	C.vs.EA.p.adj	C.vs.ED.p.adj	C.vs.INV.p.adj
AB	1		1.28726	2.46402	2.00676	2.99748		1.91415	*	1.49369	n.s.				0.42461	1.26335	1.4654	0.787033			0.3436	0.522579	0.756311	0.273505			6	13	7	6			-1.23975	-4.68446		-3.01019	-1.54723			0.254208	0.00175302		0.00818793	0.154661			0.508416	0.0104913
P1	2		1.80104	2.53737	2.44723	2.64253		1.40883	.	1.0798	n.s.				0.723288	0.637454	0.773248	0.482798			0.415937	0.256058	0.327253	0.190316			7	13	7	6			-1.61471	-2.49682		-2.26168	-0.554007			0.132458	0.0306627		0.0447595	0.591542			0.42097	0.0661865
ABa	3	3.0366	2.35648	2.5165	2.76132	2.33289	3.13632	1.06791	n.s.	0.844845	n.s.	1.1358	n.s.	1.18056	1.11365	1.33276	1.40142	1.27334	0.435924	0.398498	0.479155	0.532312	0.513561	0.550697	0.143956	10	18	49	21	28	7	-1.49029	-1.00453	0.0662398	-2.5163	-0.493496	1.10097	-1.07952	0.15366	0.32168	0.947518	0.0193068	0.624655	0.277357	0.290272	0.364556	0.556008	0.958347	0.131846
ABp	4	3.20035	2.36557	3.59744	3.98898	3.30378	6.31282	1.52075	*	0.828227	n.s.	1.58256	.	2.65954	1.3707	1.58756	1.47129	1.63354	1.19532	0.851789	0.587483	0.443553	0.37323	0.49886	0.19611	10	18	49	21	28	7	-0.926562	-3.56419	-2.09957	-7.10679	-3.12075	1.53838	-4.19276	0.372845	0.001034	0.0419951	9.6865e-06	0.00361146	0.130903	0.00112064	0.556231	0.181984	0.080392	0.000978337
EMS	5	2.85641	2.45352	2.58456	2.46876	2.66727	2.0779	1.05341	n.s.	1.08041	n.s.	0.841676	n.s.	0.834562	1.63309	1.40174	1.37519	1.43962	0.641478	0.299476	0.674856	0.545177	0.563999	0.544555	0.319741	10	18	48	20	28	7	-0.863274	-0.030945	-0.453484	0.825685	-0.301348	-0.483487	0.998149	0.395904	0.975497	0.653165	0.417489	0.765462	0.631249	0.328836	0.567896	0.98671	0.684084	0.479164
P2	6	1.82984	2.01959	2.53113	2.80787	2.32358	3.40427	1.25329	n.s.	0.827523	n.s.	1.2124	n.s.	0.654785	1.20855	1.02343	0.833701	1.11489	1.47737	0.366782	0.606726	0.4064	0.30045	0.484098	0.449474	10	18	49	21	28	7	0.53881	-2.3322	-0.857965	-2.20892	-1.59763	1.73975	-1.01552	0.594602	0.0267078	0.396878	0.0535869	0.12199	0.088449	0.342259	0.715683	0.325841	0.43632	0.155762
ABal	7	3.2498	2.48048	2.88172	2.52287	3.13805	3.27561	1.16176	n.s.	1.24384	n.s.	1.29836	n.s.	1.17154	1.14339	1.41414	1.33339	1.43752	2.36622	0.369507	0.46736	0.493284	0.535126	0.462186	0.748176	10	18	48	20	28	7	-1.67928	-0.105491	-1.71839	-0.851252	-1.18687	-1.52512	-0.798453	0.110063	0.916573	0.0931117	0.422339	0.24272	0.134575	0.449538	0.355762	0.943971	0.13734	0.479283
ABar	8	5.55509	3.41684	3.2903	3.57863	3.08435	4.80747	0.962966	n.s.	0.861879	n.s.	1.34338	n.s.	1.17153	2.33928	1.68789	2.07354	1.35209	3.2638	0.216165	0.694143	0.515663	0.586666	0.442286	0.703149	10	18	48	20	28	7	-3.21892	-0.224583	0.547129	-1.02917	0.209922	0.933662	-0.932449	0.00345241	0.823639	0.589264	0.331741	0.835504	0.357853	0.379182	0.202816	0.884305	0.624549	0.394186
ABpl	9	3.60393	3.94928	4.52215	5.31687	3.95449	6.51399	1.14506	n.s.	0.743762	n.s.	1.22516	n.s.	1.31346	2.45616	2.70651	2.86677	2.48313	3.22252	0.373565	0.630564	0.601618	0.545924	0.633534	0.512375	10	18	48	20	28	7	0.484697	-1.58332	-0.00699386	-1.90179	-0.820266	1.7149	-0.869758	0.631951	0.122115	0.994458	0.0901556	0.417864	0.0946651	0.405757	0.731524	0.42097	0.994458	0.190543
ABpr	10	5.02991	3.76462	3.49302	2.82611	3.96938	5.78061	0.927853	n.s.	1.40454	n.s.	2.04543	.	2.34414	1.99487	1.93988	1.52756	2.08418	1.77583	0.47769	0.537259	0.558252	0.547273	0.529753	0.318177	10	18	48	20	28	7	-1.44138	1.61488	-0.333827	-2.45999	0.496308	-2.1929	-3.92303	0.16841	0.116229	0.740366	0.0296182	0.623314	0.033415	0.00327088	0.364556	0.42097	0.770852	0.132081
MS	11	1.57494	2.47284	3.46332	2.62472	4.06231	3.92114	1.40054	n.s.	1.54771	n.s.	1.49393	n.s.	0.687236	1.32497	2.80697	1.65147	3.30199	1.27995	0.447267	0.543688	0.814706	0.637062	0.820094	0.33808	10	17	48	20	28	7	2.31455	-0.310261	-2.26452	-2.49372	-1.91536	-1.98261	-2.13013	0.0292212	0.758208	0.0292328	0.0288191	0.0604091	0.05399	0.0519744	0.355762	0.849965	0.0638792	0.132081
E	12	2.52243	2.48541	4.07411	2.80781	4.97862	5.61009	1.63921	*	1.77313	n.s.	1.99803	n.s.	1.06779	1.46176	3.81587	1.62844	4.6308	2.67957	0.433902	0.596786	0.941491	0.587218	0.938443	0.494693	10	17	48	20	28	7	-0.0756086	-0.634369	-2.64048	-2.91198	-2.42545	-2.29019	-2.60374	0.940367	0.529979	0.0122855	0.0208865	0.0181905	0.0280369	0.0327796	0.964824	0.683167	0.035861	0.131846
C	13	2.11995	2.38597	3.77127	3.26537	4.13262	4.76559	1.5806	*	1.26559	n.s.	1.45943	n.s.	1.30946	1.10738	2.56518	1.51311	3.08516	3.4543	0.633129	0.470946	0.683733	0.469172	0.753204	0.750729	10	17	48	20	28	7	0.538989	-2.03573	-2.72094	-1.78524	-3.02859	-1.28653	-1.11232	0.597084	0.0495578	0.0098746	0.120566	0.00361177	0.205381	0.303649	0.715683	0.342895	0.0301346	0.217086
P3	14	3.02734	2.76432	3.91616	3.39512	4.26972	5.20993	1.41668	.	1.2576	n.s.	1.53453	n.s.	1.25942	1.43357	2.92733	1.20341	3.64874	3.73892	0.426418	0.526702	0.751476	0.359115	0.862194	0.743283	10	16	47	19	28	7	-0.490912	-1.39435	-1.93714	-1.67747	-2.0662	-1.17749	-1.26038	0.628543	0.173644	0.0600903	0.138705	0.0437127	0.246946	0.251125	0.731524	0.436082	0.101617	0.237434
ABala	15	2.20248	3.07798	3.34749	2.82992	3.75723	3.05757	1.08756	n.s.	1.32768	n.s.	1.08045	n.s.	1.26936	1.72388	1.7892	1.68899	1.79353	1.81863	0.590739	0.569402	0.537599	0.604686	0.482327	0.61958	10	15	43	19	24	6	1.4607	0.420349	-1.17859	0.0235734	-0.516222	-1.73954	-0.271833	0.15781	0.677236	0.247593	0.981717	0.610181	0.0896858	0.792693	0.364556	0.791422	0.288315	0.981717
ABalp	16	2.27645	3.69239	3.69602	3.27029	4.03306	3.50782	1.00098	n.s.	1.23324	n.s.	1.07263	n.s.	0.775655	2.38928	1.98556	1.62452	2.20582	2.41636	0.349248	0.657193	0.540339	0.503287	0.552632	0.717551	10	16	43	19	24	6	2.19281	0.599525	-0.455429	0.160043	-0.00542342	-1.305	-0.225249	0.0405959	0.554071	0.65203	0.876406	0.995719	0.199201	0.82871	0.355762	0.701557	0.684084	0.894111
ABara	17	2.65654	4.11773	4.33783	2.80073	5.5547	5.43959	1.05345	n.s.	1.9833	**	1.9422	.	1.62443	2.63981	2.40727	1.51711	2.29867	1.4068	0.626769	0.6511	0.558174	0.548812	0.418134	0.269398	10	16	43	19	24	6	1.74718	1.76516	-1.77459	-1.51094	-0.291458	-4.71402	-3.92947	0.0933927	0.0908015	0.0864147	0.149141	0.773118	2.95136e-05	0.00345377	0.355762	0.380501	0.133003	0.239099
ABarp	18	4.58751	2.9061	4.38685	3.16774	5.35198	4.89098	1.50953	*	1.68953	.	1.544	n.s.	1.85708	1.7324	2.92866	1.34483	3.47092	2.41156	0.414933	0.605442	0.671482	0.430126	0.655286	0.513607	10	16	43	19	24	6	-2.30427	-0.492032	-2.94546	-1.84543	-2.38014	-2.82654	-1.67025	0.0331845	0.626524	0.0056415	0.107277	0.021555	0.0081505	0.14579	0.355762	0.755261	0.0213437	0.208366
ABpla	19	3.8526	3.66582	4.1177	3.66358	4.47722	4.24823	1.12327	n.s.	1.22209	n.s.	1.15958	n.s.	0.970542	1.91619	1.68877	1.93368	1.40584	1.48616	0.258216	0.530885	0.412509	0.534758	0.317269	0.364407	10	16	43	19	24	6	-0.328306	0.00343559	-1.45303	-0.753395	-0.830846	-1.54	-0.777871	0.745613	0.99728	0.158388	0.466146	0.414182	0.133438	0.453185	0.795623	0.99728	0.201689	0.514907
ABplp	20	3.02461	3.27548	4.32042	4.13255	4.46915	4.47889	1.31902	*	1.08145	n.s.	1.08381	n.s.	0.682904	1.07562	2.25616	2.48503	2.10003	1.99438	0.231427	0.333859	0.525245	0.609242	0.47479	0.463838	10	15	43	19	24	6	0.713087	-1.35152	-2.337	-1.39888	-2.36324	-0.471906	-0.348446	0.482971	0.188308	0.025127	0.209825	0.0220139	0.6399	0.73445	0.645191	0.436082	0.0577594	0.286382
ABpra	21	4.76041	3.46249	4.41767	3.4744	5.16442	5.33893	1.27586	n.s.	1.48642	n.s.	1.53665	n.s.	2.07324	1.66555	2.95767	1.83783	3.46612	2.43035	0.446404	0.488542	0.673401	0.535924	0.678144	0.47418	10	16	43	19	24	6	-1.67114	-0.0200837	-2.07312	-1.74387	-1.55603	-2.05195	-1.72954	0.113957	0.984098	0.045541	0.125668	0.126341	0.0474256	0.127917	0.355762	0.989722	0.0839662	0.218835
ABprp	22	5.26442	3.28999	3.77172	2.87941	4.47814	9.23922	1.14642	n.s.	1.55523	.	3.20872	n.s.	1.23791	1.46339	2.29827	1.28186	2.67975	4.176	0.241025	0.451752	0.612885	0.451038	0.60464	0.470819	10	16	43	19	24	6	-3.68497	0.874715	-1.8055	-3.41192	-0.950835	-2.57427	-3.67614	0.00132169	0.388643	0.0791674	0.0165178	0.347076	0.0144992	0.0129366	0.202816	0.609017	0.12624	0.131846
MSa	23	1.9152	2.13399	4.93823	3.47094	6.08655	6.75768	2.31408	***	1.75358	*	1.94693	n.s.	0.578796	0.82263	2.61439	1.9239	2.53517	2.25299	0.309766	0.392902	0.532646	0.561986	0.421048	0.347289	10	13	41	18	23	6	0.747986	-2.63371	-6.865	-4.87908	-5.99554	-3.75553	-3.20505	0.462809	0.0144191	1.50188e-07	0.00330858	1.95875e-07	0.000564818	0.0134103	0.631858	0.321541	2.65833e-05	0.0592346
MSp	24	1.9112	2.58769	4.41512	2.98302	5.53589	5.36346	1.7062	**	1.8558	*	1.798	n.s.	0.743568	0.858816	2.53888	1.27957	2.73192	3.0042	0.398785	0.338267	0.578548	0.434909	0.498857	0.583462	10	13	41	18	23	6	2.0212	-1.02866	-4.77487	-2.22172	-3.95076	-3.96063	-1.88475	0.0564168	0.312174	4.83282e-05	0.0731596	0.000237292	0.000380038	0.11176	0.355762	0.553926	0.000777645	0.172692
Ea	25	3.45718	3.32902	4.95978	3.84669	5.68571	4.41274	1.48986	*	1.47808	n.s.	1.14715	n.s.	1.15375	1.40368	3.24879	2.19783	3.64436	2.3387	0.342068	0.429758	0.659337	0.58088	0.647936	0.552072	10	13	38	15	23	6	-0.240208	-0.752224	-2.76016	-1.05104	-2.48886	-1.93906	-0.509645	0.812513	0.459212	0.00959566	0.329542	0.0164887	0.0603953	0.622882	0.856565	0.66213	0.0301346	0.394186
Ep	26	2.98816	2.66244	4.25887	4.06495	4.38534	3.97475	1.59961	*	1.07882	n.s.	0.97781	n.s.	1.33405	1.04937	2.41628	1.79723	2.77872	2.55478	0.457605	0.401716	0.571084	0.449496	0.640526	0.669532	10	13	38	15	23	6	-0.635519	-2.56045	-2.65718	-1.21193	-3.26998	-0.431605	0.0790145	0.533672	0.0174796	0.0123589	0.272632	0.00204205	0.668602	0.939209	0.669589	0.325841	0.035861	0.353024
Ca	27	2.30865	2.27786	4.10683	3.86346	4.26555	5.61465	1.80294	**	1.10407	n.s.	1.45327	n.s.	0.967407	1.26383	1.65674	1.58905	1.71542	5.17957	0.429511	0.565502	0.406065	0.418156	0.406527	0.960948	10	13	38	15	23	6	-0.0661929	-2.9383	-3.96898	-1.55677	-4.14077	-0.738702	-0.812998	0.94785	0.00685903	0.000391246	0.177212	0.000301013	0.46552	0.450681	0.964824	0.241438	0.00437263	0.259397
Cp	28	2.25024	2.57202	3.81127	3.77436	3.83535	5.13568	1.48182	*	1.01616	n.s.	1.36068	n.s.	0.933455	0.825682	1.94348	1.13024	2.35329	2.77906	0.425196	0.327199	0.513283	0.304442	0.620247	0.563674	10	13	38	15	23	6	0.861291	-3.24124	-2.33302	-2.21497	-3.1803	-0.106829	-1.16206	0.400307	0.00332086	0.0265384	0.0735224	0.00262026	0.915558	0.291743	0.569543	0.194824	0.0601086	0.172692
D	29	4.05701	4.45185	3.98047	3.00124	4.61911	7.33013	0.894116	n.s.	1.53907	n.s.	2.44237	n.s.	1.51977	2.29349	2.78297	1.58276	3.21732	4.52716	0.383969	0.525084	0.703754	0.536158	0.704096	0.643344	10	13	38	15	23	6	0.495267	1.91865	-0.180913	-1.47256	0.604316	-2.05959	-2.28697	0.625643	0.0687919	0.857578	0.189596	0.551064	0.0471606	0.0661829	0.731524	0.342895	0.872363	0.269707
P4	30	5.98421	4.61063	5.55708	5.14957	5.82284	7.37488	1.20527	n.s.	1.13074	n.s.	1.43213	n.s.	1.52302	2.41552	2.43469	2.27622	2.5466	1.70316	0.260869	0.535808	0.441007	0.449388	0.442101	0.242488	10	11	38	15	23	5	-1.57313	-0.575874	-1.34491	-2.62302	-1.14235	-0.85001	-2.31306	0.134073	0.570842	0.193145	0.0237245	0.269748	0.401551	0.0452818	0.355762	0.71254	0.23577	0.132081
ABalaa	31	2.63301	2.94587	3.62153	3.33135	3.81077	2.89254	1.22936	n.s.	1.14391	n.s.	0.868279	n.s.	0.90715	1.67047	1.75347	1.37273	1.96901	1.44122	0.353143	0.57796	0.487366	0.418933	0.522313	0.523167	10	13	38	15	23	5	0.574133	-0.66082	-1.39716	0.0671871	-1.2428	-0.883904	0.596565	0.572543	0.515206	0.173106	0.947996	0.227175	0.382649	0.570647	0.700665	0.676688	0.215773	0.957475
ABalap	32	2.54242	2.54241	3.3054	2.44231	3.86828	3.43118	1.3001	n.s.	1.58386	*	1.40489	n.s.	1.44241	1.19775	1.53161	1.18848	1.48569	1.62586	0.581522	0.480167	0.466415	0.494733	0.388244	0.497542	10	13	38	15	23	5	-1.30778e-05	0.221352	-2.91896	-1.1118	-1.83926	-3.27025	-1.25299	0.99999	0.82659	0.00663786	0.310461	0.0771109	0.00244726	0.260826	0.99999	0.884305	0.023498	0.382397
ABalpa	33	1.94997	2.54745	3.65841	3.42093	3.81328	2.28129	1.43611	.	1.11469	n.s.	0.666862	n.s.	0.650699	1.34523	1.73761	1.89482	1.65214	1.38606	0.34204	0.538224	0.478087	0.563121	0.43797	0.637956	10	13	38	15	23	5	1.40227	-1.41967	-2.49269	0.367884	-2.37583	-0.655713	1.44318	0.177688	0.167999	0.0185317	0.723665	0.0249297	0.51754	0.181173	0.374254	0.436082	0.0468586	0.753506
ABalpp	34	2.19089	2.94651	3.76558	3.78288	3.75429	2.61599	1.27798	n.s.	0.992443	n.s.	0.691534	n.s.	1.1694	1.01899	1.948	1.93555	1.9994	1.39423	0.5471	0.352482	0.520721	0.520188	0.538353	0.55961	10	13	38	15	23	5	1.62348	-1.45676	-1.60381	0.482799	-1.932	0.0439256	1.46029	0.121887	0.159445	0.118065	0.647122	0.0604068	0.965247	0.175981	0.355762	0.436082	0.160318	0.687993
ABaraa	35	2.18455	3.0984	4.46883	3.24023	5.2701	5.0257	1.4423	*	1.62646	*	1.55103	n.s.	1.42062	1.57756	2.19367	1.81946	2.07032	1.64264	0.666558	0.518945	0.494112	0.570879	0.397114	0.343189	10	13	38	15	23	5	1.45726	-0.220932	-3.53322	-2.25406	-2.42993	-3.18157	-2.04761	0.160265	0.826871	0.00131838	0.0586035	0.0215211	0.00319927	0.0767404	0.364556	0.884305	0.00972304	0.155762
ABarap	36	3.11144	3.32613	4.6469	3.46315	5.41891	4.6444	1.39709	.	1.56473	.	1.34109	n.s.	1.62686	1.40384	2.53446	1.54327	2.77651	2.55898	0.535937	0.430181	0.548997	0.453053	0.517945	0.578532	10	13	38	15	23	5	0.332751	-0.24595	-2.99958	-1.09053	-2.3325	-2.78274	-0.974789	0.743195	0.807658	0.00505111	0.325624	0.0250341	0.00859663	0.374369	0.795623	0.884305	0.0198677	0.394186
ABarpa	37	3.46625	2.57974	4.31395	3.33909	4.94973	4.98399	1.67225	*	1.48236	n.s.	1.49262	n.s.	1.78003	1.26767	2.67009	1.90837	2.93294	2.66815	0.526371	0.500847	0.623014	0.58105	0.598987	0.562111	10	13	38	15	23	5	-1.33576	-1.25447	-3.35968	-1.93276	-3.10858	-2.05082	-1.27416	0.200777	0.221516	0.00200826	0.114605	0.00330818	0.0476183	0.254367	0.39506	0.465129	0.0111374	0.214353
ABarpp	38	3.27793	3.32583	4.7024	3.53943	5.46086	6.08299	1.4139	*	1.54286	n.s.	1.71863	n.s.	2.05874	1.1484	3.01008	2.0092	3.33852	2.63252	0.643763	0.351936	0.644327	0.577124	0.618	0.454406	10	13	38	15	23	5	0.0661003	-0.35088	-2.78893	-2.26066	-2.3612	-2.21319	-1.97707	0.948285	0.728904	0.00912693	0.0779304	0.0223014	0.0333383	0.0984359	0.964824	0.833033	0.0293721	0.178886
ABplaa	39	2.93799	2.577	4.10905	3.97334	4.19755	3.87463	1.59451	*	1.05643	n.s.	0.975155	n.s.	1.1779	1.41302	1.98924	1.98853	2.02928	1.3591	0.410943	0.558863	0.487297	0.508809	0.488699	0.368309	10	13	38	15	23	5	-0.667661	-2.16181	-2.80985	-1.79428	-3.01786	-0.336995	0.124071	0.511684	0.0403574	0.00834665	0.112584	0.00521524	0.738428	0.903658	0.658416	0.325841	0.0284107	0.214353
ABplap	40	4.09287	2.96051	4.68335	5.11863	4.39947	4.50438	1.58194	*	0.8595	n.s.	0.879996	n.s.	0.96589	1.60466	2.46345	3.3136	1.73368	1.57313	0.241893	0.552446	0.529463	0.658149	0.398348	0.366707	10	13	38	15	23	5	-2.09779	-2.23778	-2.50964	-1.85454	-2.88031	0.774294	0.554547	0.0488075	0.0363001	0.0184575	0.103535	0.00699712	0.448257	0.587311	0.355762	0.325841	0.0468586	0.205039
ABplpa	41	3.60349	3.0484	5.35165	5.76872	5.07965	4.37298	1.75556	*	0.880549	n.s.	0.75805	n.s.	1.33917	1.6832	3.21887	3.51638	3.05957	2.83535	0.380921	0.562778	0.605429	0.619719	0.608866	0.680798	10	13	38	15	23	5	-0.880689	-2.6646	-2.56949	-0.980291	-3.28836	0.620985	0.894971	0.388475	0.0146155	0.0147429	0.370911	0.00209513	0.539809	0.3954	0.566527	0.321541	0.0401459	0.430598
ABplpp	42	2.61884	3.28361	5.27585	5.4082	5.18954	5.6233	1.60672	**	0.959569	n.s.	1.03977	n.s.	1.49794	1.24868	2.85187	2.99276	2.82119	3.88326	0.586285	0.387588	0.544108	0.562598	0.549539	0.725095	10	13	38	15	23	5	1.1329	-2.509	-2.79202	-1.32123	-3.44737	0.225153	-0.11316	0.272579	0.0211846	0.00868078	0.252033	0.00122459	0.823451	0.913798	0.479288	0.325841	0.0289905	0.334939
ABpraa	43	4.10778	2.79584	5.39518	4.36441	6.06742	6.35539	1.92972	**	1.3902	n.s.	1.45619	n.s.	1.92575	1.27251	3.69121	2.28941	4.28748	2.8527	0.480527	0.463898	0.688669	0.533306	0.714322	0.471305	10	13	38	15	23	5	-1.86394	-2.27836	-3.40384	-2.68913	-3.73972	-1.58898	-1.416	0.0822795	0.0325679	0.00201354	0.0469556	0.000483186	0.121072	0.207955	0.355762	0.325841	0.0111374	0.155762
ABprap	44	4.06857	3.36152	5.19128	3.96617	5.99027	4.08419	1.54433	*	1.51034	n.s.	1.02976	n.s.	1.94182	1.22609	3.4206	1.86281	3.9723	2.26499	0.489204	0.371757	0.663248	0.477502	0.670334	0.582305	10	13	38	15	23	5	-1.00731	-1.0265	-2.93593	-0.676348	-2.81155	-2.11327	-0.105247	0.330467	0.314731	0.00650482	0.529234	0.00708054	0.0421373	0.919655	0.531101	0.553926	0.023497	0.568645
ABprpa	45	4.44506	3.59614	5.10073	3.94115	5.85698	10.2653	1.41839	*	1.48611	.	2.60464	n.s.	2.10714	1.61685	2.4898	1.80131	2.61654	5.65324	0.485891	0.458253	0.491338	0.464669	0.451595	0.578249	10	13	38	15	23	5	-1.05694	-0.534012	-3.20128	-2.59736	-2.49305	-2.67229	-2.46016	0.3058	0.597877	0.00298529	0.0566434	0.0179521	0.0112635	0.065656	0.509666	0.735849	0.014281	0.155762
ABprpp	46	3.40245	3.38413	4.20571	3.80964	4.46402	10.3165	1.24277	n.s.	1.17177	n.s.	2.70798	n.s.	1.47194	1.34155	1.89766	1.51514	2.10211	5.9319	0.443426	0.404048	0.454179	0.40434	0.476019	0.603744	10	13	38	15	23	5	-0.0307481	-0.788141	-1.87823	-2.58785	-1.70129	-1.11381	-2.42654	0.9758	0.437747	0.069112	0.0585333	0.0993873	0.272833	0.0695822	0.981408	0.645626	0.113267	0.155762
MSaa	47	2.23732	2.21905	4.11605	2.84413	4.89027	4.99159	1.85487	**	1.71942	*	1.75505	n.s.	1.27663	0.985297	2.16048	1.23507	2.25399	1.38061	0.584872	0.452557	0.528437	0.442006	0.465924	0.290416	10	13	37	14	23	5	-0.0374878	-1.45869	-4.91338	-4.10626	-4.23305	-3.56268	-3.06725	0.970545	0.157366	2.45404e-05	0.00718087	0.000113778	0.00108969	0.0200857	0.981408	0.436082	0.000577588	0.0906585
MSap	48	2.0683	2.77607	7.08383	4.78045	8.48589	9.89495	2.55175	***	1.77512	.	2.06988	n.s.	1.461	1.45981	4.56726	3.30566	4.71654	3.00752	0.724036	0.535968	0.6491	0.703844	0.561852	0.319142	10	13	37	14	23	5	1.15214	-2.06247	-5.36865	-5.06818	-5.04979	-2.80286	-3.17826	0.263191	0.0537604	9.51478e-06	0.00448545	6.84879e-06	0.00828723	0.0135745	0.479288	0.342895	0.000438321	0.0647187
MSpa	49	2.63983	3.41361	4.76307	3.48587	5.5405	4.89119	1.39532	*	1.58942	*	1.40315	n.s.	0.832085	1.24892	2.28223	1.03703	2.49353	1.31992	0.323083	0.372902	0.482389	0.302807	0.454948	0.283349	10	13	37	14	23	5	1.7788	-0.162881	-3.40436	-2.1589	-2.64267	-3.48719	-2.15503	0.0899854	0.87201	0.00172835	0.0679721	0.0117954	0.00144506	0.0755924	0.355762	0.920529	0.0104913	0.172692
MSpp	50	3.5742	3.9406	6.11163	4.35319	7.18199	5.83162	1.55094	*	1.64982	*	1.33962	n.s.	1.37244	2.63328	2.84075	1.99194	2.77402	1.4043	0.393583	0.681094	0.467951	0.465752	0.390444	0.252847	10	13	37	14	23	5	0.43128	-0.456509	-3.4792	-1.96321	-2.50438	-3.59844	-1.79574	0.671159	0.652435	0.0017773	0.0701731	0.0199599	0.00100921	0.102188	0.762597	0.775869	0.0104913	0.172692
Caa	51	2.77076	2.67756	4.91981	4.29172	5.30212	7.24932	1.83742	**	1.23543	n.s.	1.68914	n.s.	0.996392	1.55774	2.20237	1.60798	2.45059	6.06655	0.3686	0.594997	0.450679	0.381361	0.467214	0.878686	10	11	37	14	23	5	-0.164794	-2.53553	-3.78155	-1.66041	-3.78099	-1.51331	-1.07672	0.871031	0.0188692	0.000717697	0.168089	0.000959418	0.139249	0.339494	0.901955	0.325841	0.00696341	0.253388
Cap	52	3.31853	4.04244	4.85167	4.38072	5.15136	7.3375	1.20018	n.s.	1.17592	n.s.	1.67495	n.s.	1.37253	2.20737	2.315	1.93637	2.52367	5.40018	0.423937	0.558459	0.480469	0.449915	0.495471	0.772769	10	11	36	14	22	5	0.911072	-0.401244	-1.29573	-1.31536	-1.05191	-1.03229	-1.19715	0.375059	0.692475	0.208077	0.249878	0.307319	0.309517	0.292089	0.556231	0.801813	0.248379	0.334939
Cpa	53	3.36835	2.9941	4.73647	4.07019	5.14203	4.80781	1.58194	*	1.26334	n.s.	1.18123	n.s.	1.16919	1.50522	2.24367	1.84418	2.40279	2.40285	0.355787	0.513204	0.476902	0.461186	0.472364	0.52477	10	12	37	14	23	5	-0.655978	-1.63772	-3.23877	-1.56474	-3.05696	-1.52508	-0.623924	0.519341	0.11455	0.00281631	0.174484	0.00486474	0.13678	0.556477	0.658585	0.42097	0.0138469	0.25916
Cpp	54	3.78591	3.48542	4.93759	4.93905	4.93666	5.37292	1.41664	*	0.999515	n.s.	1.08784	n.s.	1.53615	1.28696	2.38237	2.24189	2.51954	3.35813	0.415898	0.377632	0.485847	0.462016	0.516174	0.656261	10	11	36	14	22	5	-0.483314	-2.03635	-2.19002	-1.21686	-2.61567	0.00297488	-0.268329	0.634806	0.0543281	0.036186	0.283058	0.0134882	0.997646	0.798518	0.731524	0.342895	0.0719654	0.361884
ABalaaa	55	3.77449	2.5309	4.31434	4.37324	4.27507	4.9088	1.70466	.	0.977554	n.s.	1.12246	n.s.	1.62542	2.02731	2.24617	2.60755	2.03797	2.22785	0.4414	0.819226	0.524347	0.6069	0.482386	0.482215	10	11	35	14	21	4	-1.55712	-1.98745	-2.30735	-1.87145	-2.47847	0.11874	-0.407589	0.136175	0.0589072	0.031572	0.120846	0.0230886	0.906502	0.69867	0.355762	0.342895	0.0673283	0.217086
ABalaap	56	2.09475	2.43532	3.77819	3.22194	4.14902	4.14327	1.55142	.	1.28774	n.s.	1.28595	n.s.	0.799743	1.59142	2.39859	2.74095	2.12983	2.03493	0.391329	0.668327	0.639385	0.865903	0.519444	0.521838	10	11	35	14	21	4	0.627886	-0.898275	-2.56536	-1.51827	-2.13771	-1.06862	-0.73486	0.539497	0.379025	0.016402	0.196925	0.0422854	0.296264	0.488034	0.669589	0.605469	0.0433307	0.272458
ABalapa	57	2.89695	2.18935	4.41175	3.09625	5.28876	5.38149	2.0151	**	1.70812	.	1.73807	n.s.	1.75689	0.898359	2.43278	1.90917	2.38183	2.71528	0.621623	0.419658	0.55537	0.627618	0.455718	0.536094	10	11	35	14	21	4	-1.14483	-1.56988	-5.28817	-2.3058	-4.51334	-3.01023	-1.57564	0.272737	0.132642	1.2382e-05	0.0978625	4.96299e-05	0.0050829	0.192233	0.479288	0.42097	0.000438321	0.201717
ABalapp	58	1.84829	2.14979	3.31978	2.44593	3.90235	4.12253	1.54423	*	1.59544	.	1.68546	n.s.	0.548968	1.21576	1.67025	1.28637	1.66615	0.707847	0.30444	0.578375	0.506713	0.535313	0.432044	0.182433	10	11	35	14	21	4	0.743375	-0.589264	-3.39447	-3.87161	-2.5287	-2.91056	-3.39795	0.46938	0.561647	0.00217548	0.00335935	0.0187642	0.00649948	0.0074181	0.631858	0.706071	0.0113253	0.0592346
ABalpaa	59	2.87715	2.56257	4.11902	3.27055	4.68468	5.28452	1.60738	.	1.43238	n.s.	1.61579	n.s.	1.56127	1.97259	2.09676	1.8697	2.08847	1.83693	0.556213	0.787263	0.512678	0.581888	0.451116	0.369331	10	11	35	14	21	4	-0.406964	-0.911388	-2.83215	-2.48757	-2.24808	-2.09094	-1.92614	0.688661	0.372417	0.00984087	0.0491075	0.0375614	0.0450798	0.112756	0.767615	0.605469	0.0301346	0.155762
ABalpap	60	2.91163	2.37948	4.78736	3.80646	5.44129	5.37222	2.01193	**	1.42949	n.s.	1.41134	n.s.	0.71092	1.67346	2.44425	2.01356	2.52953	1.99153	0.250269	0.719271	0.51421	0.538431	0.470411	0.393878	10	11	35	14	21	4	-0.963366	-1.93438	-4.09414	-2.68093	-3.69227	-2.12065	-1.38332	0.351987	0.0655165	0.000324204	0.0471886	0.00110581	0.0418366	0.226139	0.535633	0.342895	0.00409886	0.155762
ABalppa	61	2.52907	3.09584	4.44378	3.99074	4.74581	5.29996	1.43541	n.s.	1.18921	n.s.	1.32807	n.s.	1.70476	2.13828	2.19163	1.58399	2.50902	2.34426	0.690918	0.706394	0.496713	0.404004	0.534975	0.46996	10	11	35	14	21	4	0.674403	-1.16028	-1.95072	-1.64765	-1.8128	-1.09101	-1.05055	0.508303	0.261162	0.0631088	0.160885	0.0874106	0.283182	0.355349	0.658416	0.516456	0.10538	0.253388
ABalppp	62	2.68885	2.88168	4.08399	4.05005	4.10662	5.5214	1.41723	n.s.	1.01397	n.s.	1.36329	n.s.	1.51246	1.82518	1.84699	1.9115	1.85013	1.46084	0.576556	0.64777	0.455481	0.480399	0.455887	0.281114	10	11	35	14	21	4	0.264481	-1.55597	-1.79471	-2.88643	-1.90028	-0.0868862	-1.65071	0.794278	0.133945	0.0873408	0.0244989	0.074538	0.931395	0.147492	0.842417	0.42097	0.13327	0.132081
ABaraaa	63	3.29784	2.63374	4.67757	3.55108	5.42857	4.57605	1.77602	*	1.52871	n.s.	1.28864	n.s.	1.8972	1.54283	2.77348	2.18901	2.91232	0.795726	0.589668	0.599109	0.597167	0.627444	0.542867	0.184757	10	11	35	14	21	4	-0.87478	-1.22731	-3.54864	-3.17309	-3.09469	-2.17351	-1.4487	0.393601	0.232231	0.00129892	0.00909232	0.00413973	0.0371501	0.168801	0.567896	0.480855	0.00972304	0.0940931
ABaraap	64	3.35531	2.83869	4.84129	3.28253	5.88046	5.16061	1.70547	**	1.79144	*	1.57215	n.s.	1.32486	1.0817	2.51363	1.63935	2.48186	1.19229	0.404727	0.389717	0.522916	0.508337	0.427077	0.245476	10	11	35	14	21	4	-0.973032	-0.812597	-4.81135	-3.41697	-3.7388	-3.72934	-2.53854	0.343836	0.424986	4.15195e-05	0.0193118	0.000587291	0.000720312	0.0403536	0.532489	0.633918	0.000734896	0.131846
ABarapa	65	3.36076	2.73024	5.89082	3.88231	7.22982	7.47434	2.15762	**	1.86225	*	1.92523	n.s.	2.45404	1.48488	3.47504	2.13089	3.58763	3.18024	0.748458	0.556223	0.594121	0.558672	0.502134	0.452081	10	11	35	14	21	4	-0.703767	-1.59034	-4.98922	-2.87182	-4.27939	-3.45777	-2.12669	0.492697	0.125565	2.61057e-05	0.0534274	0.000115315	0.00153286	0.104122	0.650563	0.42097	0.000577588	0.155762
ABarapp	66	4.15745	2.89705	5.92568	4.0378	7.18427	9.69269	2.04542	**	1.77925	*	2.40049	n.s.	2.05736	1.62873	3.20616	2.13784	3.21656	3.12089	0.507231	0.574979	0.544927	0.538909	0.453053	0.342108	10	11	35	14	21	4	-1.54627	-1.51415	-5.00467	-4.15409	-4.14122	-3.47653	-3.40295	0.140278	0.143616	2.29972e-05	0.0175153	0.00021344	0.00144508	0.0289604	0.36101	0.435801	0.000577588	0.131846
ABarpaa	67	3.50479	2.30145	4.68769	3.26508	5.68352	5.73252	2.03684	**	1.7407	n.s.	1.75571	n.s.	2.37733	1.11456	3.16921	2.46618	3.27843	3.24096	0.695267	0.495294	0.681041	0.768808	0.584041	0.600698	10	11	34	14	20	4	-1.4613	-1.30248	-4.19385	-2.07321	-3.73425	-2.45322	-1.41045	0.168598	0.208342	0.000287615	0.122514	0.000554317	0.0198304	0.230403	0.364556	0.458353	0.00391598	0.217086
ABarpap	68	3.53879	2.88818	4.13447	2.78413	5.0347	6.0094	1.43152	n.s.	1.80835	*	2.15844	n.s.	1.79976	1.70254	2.31834	1.66278	2.2831	2.15975	0.521296	0.602882	0.564739	0.607899	0.458871	0.381857	10	11	35	14	21	4	-0.848884	0.153236	-3.00065	-2.61042	-1.92981	-3.37107	-2.76197	0.406767	0.87965	0.00585838	0.053507	0.0661785	0.0019375	0.0497093	0.574067	0.921538	0.0216028	0.155762
ABarppa	69	3.78867	2.62702	4.94315	3.24457	6.07553	6.13949	1.88165	*	1.87252	.	1.89224	n.s.	2.1694	1.28166	3.46414	2.09678	3.76519	4.1293	0.586918	0.498962	0.705801	0.657782	0.627108	0.714616	10	11	35	14	21	4	-1.47534	-0.907206	-3.79804	-1.6722	-3.30136	-2.8465	-1.35318	0.161769	0.374185	0.000747485	0.187016	0.00195276	0.00763002	0.257766	0.364556	0.605469	0.00696341	0.269707
ABarppp	70	3.82898	3.54435	4.83565	2.95326	6.09058	6.51634	1.36433	n.s.	2.06233	*	2.20649	n.s.	1.56109	1.49823	3.44689	1.75238	3.7507	3.27265	0.417896	0.432316	0.7179	0.603968	0.623151	0.533611	10	11	35	14	21	4	-0.425366	0.908401	-2.72366	-1.75077	-1.75154	-3.32698	-2.09343	0.675443	0.373171	0.0108676	0.165755	0.0876926	0.002314	0.114169	0.762597	0.605469	0.0326029	0.253388
ABplaaa	71	3.73573	2.87054	4.766	4.00977	5.27015	4.94531	1.66031	*	1.31433	n.s.	1.23332	n.s.	1.09687	1.43841	2.23294	1.58903	2.48351	1.60193	0.300955	0.512483	0.471862	0.403365	0.47685	0.344175	10	11	35	14	21	4	-1.55794	-1.87682	-3.45707	-2.27785	-3.29682	-1.83056	-1.03194	0.136206	0.073586	0.00167651	0.0729083	0.00279245	0.0762176	0.350924	0.355762	0.342895	0.0104913	0.172692
ABplaap	72	3.16778	2.94356	4.04096	4.04926	4.03542	3.72538	1.37281	n.s.	0.996582	n.s.	0.920014	n.s.	0.922562	1.62807	2.26009	2.52334	2.13186	1.55331	0.298514	0.565667	0.56329	0.634288	0.534575	0.443014	10	11	35	14	21	4	-0.392654	-1.32558	-1.61446	-0.850929	-1.76425	0.0168945	0.314881	0.69973	0.198405	0.118653	0.429642	0.090815	0.986657	0.760754	0.775018	0.447684	0.160318	0.482154
ABplapa	73	4.35408	3.07459	5.15747	5.01514	5.25235	5.5896	1.67745	*	1.0473	n.s.	1.11455	n.s.	1.20702	1.53962	2.51568	2.67889	2.46381	1.1143	0.284147	0.512136	0.491258	0.543698	0.474671	0.211812	10	11	35	14	21	4	-2.12899	-2.27421	-3.06589	-3.46804	-3.30862	-0.264938	-0.63322	0.0468272	0.0333924	0.00467699	0.00931615	0.00258139	0.793119	0.537618	0.355762	0.325841	0.0197102	0.0940931
ABplapp	74	4.28603	2.95775	4.81447	5.17319	4.57533	4.84652	1.62775	.	0.884432	n.s.	0.936854	n.s.	1.575	2.46402	3.23933	3.8857	2.80612	1.93709	0.37666	0.852006	0.677638	0.764536	0.620617	0.424668	10	11	35	14	21	4	-1.48505	-1.73504	-1.68014	-1.54732	-2.01182	0.495905	0.230039	0.155671	0.0966203	0.106514	0.166597	0.0566945	0.624904	0.822431	0.364556	0.386481	0.149627	0.253388
ABplpaa	75	4.4494	3.10857	5.40565	5.61625	5.26525	6.20036	1.73895	*	0.937502	n.s.	1.104	n.s.	2.05031	2.26628	3.53988	4.26623	3.06921	4.38807	0.472326	0.745612	0.659526	0.773188	0.589859	0.751944	10	11	35	14	21	4	-1.42345	-1.8865	-2.25402	-1.34544	-2.5291	0.265436	-0.236234	0.170821	0.0734275	0.0327447	0.256967	0.0176813	0.793164	0.823079	0.364556	0.342895	0.0681861	0.33706
ABplpap	76	3.9957	3.2687	5.12302	5.29142	5.01075	5.86093	1.56729	.	0.946958	n.s.	1.10763	n.s.	2.46651	2.29602	3.60808	4.4163	3.06927	4.70434	0.632724	0.71839	0.709318	0.84952	0.61983	0.852827	10	11	35	14	21	4	-0.6971	-1.47822	-1.80852	-1.05722	-2.00987	0.206813	-0.216406	0.494428	0.15466	0.0820776	0.357252	0.0546114	0.838121	0.837873	0.650563	0.436082	0.128808	0.419563
ABplppa	77	4.75957	3.23965	5.42498	5.68384	5.25242	5.83479	1.67456	.	0.924097	n.s.	1.02656	n.s.	2.70284	2.32418	3.95286	4.90853	3.28994	6.56096	0.582072	0.733724	0.733845	0.879016	0.633823	1.19473	10	11	35	14	21	4	-1.37516	-1.64338	-2.00627	-0.773632	-2.257	0.288488	-0.0427264	0.186058	0.116396	0.0549068	0.491112	0.0316276	0.775837	0.967961	0.374254	0.42097	0.097185	0.533359
ABplppp	78	3.69949	3.23228	5.41713	6.05344	4.99293	6.95197	1.67595	.	0.824808	n.s.	1.14843	n.s.	2.27052	2.15901	3.89631	4.42296	3.55248	5.85299	0.629081	0.683132	0.724395	0.743698	0.719973	0.894538	10	11	35	14	21	4	-0.482078	-2.09057	-1.73929	-1.24071	-2.35941	0.75022	-0.284683	0.635381	0.0497301	0.0925338	0.295568	0.0247171	0.460495	0.789904	0.731524	0.342895	0.13734	0.373155
ABpraaa	79	5.00434	2.75112	5.81666	4.23758	6.86939	7.46689	2.11429	*	1.62106	n.s.	1.76207	n.s.	2.75077	1.77681	4.56483	3.39796	5.001	3.77078	0.563418	0.660528	0.790391	0.816183	0.736679	0.536562	10	11	35	14	21	4	-2.20557	-1.40979	-3.38754	-2.40598	-3.2635	-1.85372	-1.54313	0.0432547	0.173659	0.00213645	0.0831215	0.00220005	0.0727457	0.189851	0.355762	0.436082	0.0113253	0.182506
ABpraap	80	4.53024	3.24704	5.99709	4.02448	7.31216	9.00523	1.84694	*	1.81692	n.s.	2.23762	n.s.	3.33589	2.10983	4.32421	3.11272	4.57716	2.01686	0.754771	0.664538	0.726203	0.78726	0.633417	0.237963	10	11	35	14	21	4	-1.04167	-0.742349	-3.43282	-4.82944	-2.83808	-2.5292	-3.80999	0.314114	0.465521	0.00177819	0.00351889	0.00744896	0.0163977	0.00560536	0.518584	0.66213	0.0104913	0.0592346
ABprapa	81	4.7805	3.58338	5.53188	4.28005	6.36643	7.11899	1.54376	n.s.	1.48747	n.s.	1.66329	n.s.	2.64708	2.51462	3.90878	2.25048	4.56654	3.6286	0.567568	0.717693	0.711639	0.535195	0.725824	0.541563	10	11	35	14	21	4	-1.05995	-0.719861	-2.22263	-1.79806	-1.93751	-1.7925	-1.48527	0.302756	0.479798	0.0339639	0.144788	0.0634235	0.0828445	0.217523	0.509445	0.664917	0.0699025	0.239099
ABprapp	82	4.03246	4.17385	4.72562	3.42463	5.59294	7.92587	1.1322	n.s.	1.63315	n.s.	2.31437	n.s.	1.30177	2.09874	3.48384	1.39399	4.17078	3.26664	0.330894	0.514259	0.742489	0.414315	0.754599	0.437909	10	11	35	14	21	4	0.187297	1.02029	-1.28019	-2.14202	-0.638315	-2.20483	-2.68686	0.853659	0.322232	0.210293	0.0998817	0.52836	0.0364666	0.0669414	0.889228	0.556008	0.248379	0.201761
ABprpaa	83	5.46038	3.84037	6.71226	4.55656	8.1494	12.7775	1.74782	*	1.7885	.	2.80419	n.s.	3.03935	1.94717	4.17752	3.28144	4.15297	4.54359	0.570533	0.51855	0.626817	0.733018	0.515671	0.377819	10	11	35	14	21	4	-1.43841	-0.678614	-3.99058	-3.8088	-3.12736	-2.84893	-3.37586	0.170747	0.504583	0.000395266	0.0253514	0.00342589	0.00761628	0.028542	0.364556	0.670713	0.00437263	0.132081
ABprpap	84	5.25697	3.09774	6.08507	3.78683	7.61723	12.8279	1.96436	**	2.01151	*	3.38751	n.s.	1.58355	1.79404	3.65967	2.14468	3.69004	4.5647	0.308759	0.592307	0.605713	0.576465	0.4902	0.378081	10	11	35	14	21	4	-2.92924	-0.874346	-4.65904	-4.14832	-3.63537	-3.87534	-3.842	0.00861053	0.391016	6.11971e-05	0.0205622	0.000873258	0.000486514	0.0250217	0.301369	0.609017	0.000902657	0.131846
ABprppa	85	4.09199	3.3769	5.95863	4.08442	7.2081	12.657	1.76452	*	1.76478	.	3.09884	n.s.	2.00886	2.32214	4.22724	2.13922	4.82759	5.61298	0.503197	0.703282	0.7145	0.533103	0.677718	0.471187	10	11	35	14	21	4	-0.756389	-0.782716	-3.02882	-3.20831	-2.58073	-2.60608	-2.99306	0.458711	0.442656	0.00502219	0.0414331	0.0147158	0.0142007	0.0523276	0.631858	0.645626	0.0198677	0.155762
ABprppp	86	3.97177	2.91837	4.78371	2.84199	6.07819	10.9295	1.63917	*	2.13871	*	3.84573	n.s.	0.354309	1.69092	3.46662	1.82272	3.72445	4.30728	0.0914368	0.592576	0.729847	0.652805	0.62005	0.418727	10	11	35	14	21	4	-2.01802	0.10831	-3.29349	-3.61978	-2.40159	-3.41533	-3.66275	0.0687402	0.914719	0.00256506	0.0303034	0.0216734	0.00180491	0.0297696	0.355762	0.943971	0.0129719	0.132081
Eal	87	2.21206	3.23997	5.5158	4.50498	6.22338	7.61301	1.70243	*	1.38144	n.s.	1.68991	n.s.	1.01687	1.9662	2.61785	1.5851	2.98393	3.64819	0.471188	0.623714	0.478099	0.358138	0.485464	0.509155	10	9	34	14	20	4	1.40803	-1.621	-3.18988	-2.25617	-2.86476	-2.17422	-1.6597	0.185109	0.126524	0.00409919	0.0905549	0.0110275	0.0376465	0.186466	0.374254	0.42097	0.0178836	0.190543
Ear	88	2.6361	3.87929	4.41195	3.94975	4.73548	5.19813	1.13731	n.s.	1.19893	n.s.	1.31607	n.s.	0.772939	2.2886	2.48035	1.75323	2.8835	2.98069	0.300544	0.60634	0.566323	0.451809	0.616525	0.609255	10	9	34	14	20	4	1.55193	-0.0787012	-0.857177	-0.787721	-0.609828	-0.985798	-0.79908	0.152872	0.938388	0.401837	0.469025	0.552152	0.33174	0.473446	0.364556	0.95466	0.439044	0.514907
Epl	89	2.71514	4.01084	4.02978	3.81392	4.18883	4.26213	1.00472	n.s.	1.0983	n.s.	1.11752	n.s.	1.53562	2.07286	2.1189	2.14918	2.14078	2.38649	0.581286	0.53117	0.529795	0.57357	0.517794	0.594923	9	9	33	14	19	4	1.5068	0.21916	-0.209957	-0.182245	-0.0241737	-0.496079	-0.338452	0.152979	0.829036	0.836307	0.86237	0.981083	0.623696	0.750249	0.364556	0.884305	0.855643	0.888769
Epr	90	1.88381	2.63642	3.54079	3.28543	3.71954	4.92109	1.34303	n.s.	1.13213	n.s.	1.49785	n.s.	1.26167	1.83537	1.70981	1.17521	2.01268	2.34926	0.690676	0.715499	0.48644	0.364092	0.547875	0.507222	8	9	34	14	20	4	0.994016	-0.943734	-1.4261	-1.72506	-1.33302	-0.790987	-1.34523	0.33687	0.363549	0.172034	0.148605	0.207391	0.434924	0.260364	0.531101	0.605469	0.215773	0.239099
Da	91	4.0165	3.1138	5.71972	4.82267	6.34766	10.7172	1.83689	*	1.31621	n.s.	2.22226	n.s.	3.32697	1.45831	3.20907	2.78107	3.40386	7.67331	0.85421	0.482973	0.565179	0.586964	0.542942	0.760729	8	8	34	14	20	4	-0.702872	-1.8891	-3.51766	-1.96412	-3.45551	-1.43346	-1.50833	0.498835	0.0735066	0.00163912	0.14105	0.00196412	0.161692	0.222306	0.651463	0.342895	0.0104913	0.237434
Dp	92	3.62678	2.67169	4.26733	3.03015	5.13335	9.79826	1.59724	*	1.69409	.	3.23359	n.s.	3.25589	0.941279	2.72095	1.46927	3.07645	5.53677	0.925788	0.363326	0.642314	0.493542	0.606798	0.600394	8	8	34	14	20	4	-0.79706	-0.696403	-3.22128	-2.55587	-2.78396	-2.65521	-2.42056	0.44798	0.494352	0.00350542	0.0811699	0.00872576	0.0127552	0.0907763	0.627172	0.670713	0.0159092	0.182181
MSaaa	93	3.05547	2.75826	4.36463	3.35743	5.06967	3.22524	1.58238	*	1.50999	n.s.	0.960629	n.s.	0.875258	1.2045	2.90798	2.06698	3.23935	2.23143	0.293617	0.447605	0.671161	0.626639	0.646954	0.735106	10	10	34	14	20	4	-0.631233	-0.892928	-2.82435	-0.396099	-2.55981	-1.87961	0.106175	0.536571	0.381858	0.00885628	0.713673	0.0147154	0.0693502	0.919928	0.669589	0.605469	0.0290289	0.750843
MSaap	94	3.24372	2.43938	4.74288	3.75003	5.43787	4.46573	1.9443	**	1.45009	n.s.	1.19085	n.s.	0.911604	0.884837	2.9872	1.95756	3.41201	2.42726	0.288063	0.371799	0.63446	0.531333	0.635296	0.577501	10	10	34	14	20	4	-2.00214	-2.20907	-3.68982	-1.62698	-3.94615	-1.8245	-0.541546	0.0605859	0.0394944	0.00117589	0.193314	0.000296878	0.0777163	0.615678	0.355762	0.325841	0.00972304	0.271177
MSapa	95	3.26691	2.90973	7.59058	5.48311	9.14345	10.1645	2.60869	***	1.66757	n.s.	1.85378	n.s.	2.54759	1.5254	4.81254	3.93491	4.89815	4.68322	0.79931	0.538803	0.638818	0.730456	0.542749	0.48954	10	9	33	14	19	4	-0.374932	-2.20301	-5.0541	-3.02763	-4.77644	-2.3783	-1.82373	0.712983	0.0407302	3.67774e-05	0.0501414	2.55006e-05	0.0238004	0.137371	0.782572	0.325841	0.000723289	0.155762
MSapp	96	3.8725	1.92438	8.05696	5.67123	9.81487	11.5184	4.18678	***	1.73064	n.s.	2.03103	n.s.	3.13094	1.43441	5.59888	4.54059	5.75759	6.31362	0.828719	0.766095	0.700176	0.814934	0.594338	0.582392	10	9	33	14	19	4	-1.77182	-2.87264	-5.61697	-3.00488	-5.649	-2.3101	-1.7289	0.100031	0.0106998	1.16705e-05	0.0542292	1.47247e-06	0.0277491	0.160118	0.355762	0.313861	0.000438321	0.155762
MSpaa	97	3.45976	3.17843	6.32802	4.62433	7.52059	8.07572	1.99092	***	1.62631	.	1.74635	n.s.	1.67834	1.11475	3.17118	2.56194	3.0561	2.7493	0.497231	0.35949	0.504819	0.563906	0.411443	0.361718	10	10	34	14	20	4	-0.44154	-1.87749	-5.64703	-3.45091	-4.85967	-2.99395	-2.24738	0.664863	0.0759825	5.75444e-06	0.0336248	1.81237e-05	0.0053851	0.0790664	0.760464	0.342895	0.000438321	0.135844
MSpap	98	2.74412	3.28143	5.73401	5.23102	6.08611	7.88202	1.74741	**	1.16347	n.s.	1.50679	n.s.	1.47495	0.970072	2.65212	1.8428	3.09451	3.03651	0.550931	0.303016	0.465925	0.358574	0.514811	0.409323	10	10	34	14	20	4	0.962472	-3.36002	-3.70546	-2.97017	-4.4705	-1.00678	-1.66088	0.350534	0.00302625	0.00104361	0.0534543	6.35848e-05	0.321746	0.178758	0.535633	0.194824	0.00923591	0.155762
MSppa	99	3.23773	4.13328	7.43915	4.72931	9.43587	9.39908	1.79982	*	1.99519	*	1.98741	**	2.49821	2.72501	4.5344	2.99691	4.48844	0.826362	0.790883	0.675767	0.61415	0.645006	0.481937	0.0934144	10	10	33	14	19	4	0.76605	-0.506617	-3.94915	-5.51012	-2.82892	-3.6078	-5.18144	0.45365	0.617799	0.000525978	0.00014461	0.00899078	0.00107982	9.19117e-05	0.630069	0.754553	0.00547636	0.00486854
MSppp	100	3.27901	2.86309	5.43143	4.36842	6.15876	5.83557	1.89705	**	1.40984	n.s.	1.33585	n.s.	1.73323	1.28641	3.27254	2.61074	3.53916	0.417732	0.541798	0.46054	0.607225	0.609133	0.582215	0.0760578	10	10	32	13	19	4	-0.609351	-1.81248	-3.62901	-6.50027	-3.63162	-1.64567	-1.94682	0.550538	0.0863212	0.00127477	3.06479e-05	0.000836295	0.11035	0.0723547	0.67848	0.37055	0.00972304	0.00154772
Caaa	101	5.39929	5.13755	4.88493	4.5261	5.096	8.25819	0.950827	n.s.	1.12591	n.s.	1.82457	n.s.	1.42998	1.15506	2.27528	2.6199	2.10326	4.97208	0.274305	0.236067	0.470088	0.593312	0.418798	0.639709	7	5	27	10	17	4	-0.350093	0.626277	0.0572376	-1.22901	0.373059	-0.585751	-1.42421	0.733709	0.542013	0.955253	0.300331	0.716229	0.566297	0.233205	0.792586	0.691263	0.960681	0.374487
Caap	102	8.20817	7.88996	6.74961	6.61447	6.82237		0.855468	n.s.	1.03143	n.s.			1.58647	0.418619	3.39192	3.5311	3.45915		0.205359	0.0563732	0.508817	0.55291	0.516781		4	4	20	7	13		-0.387877	0.944149	1.0872		1.44934	-0.126486		0.721039	0.379927	0.29662		0.161857	0.901412		0.783738	0.605469	0.33655
Capa	103				7.38824	10.3709				1.40371	n.s.						2.28628	3.76239					0.324921	0.374119					5	8							-1.77778							0.103068
Capp	104	5.56539	4.7761	6.10043	5.4485	6.67087		1.27728	n.s.	1.22435	n.s.			2.10349	0.647571	3.43438	3.33278	3.64313		0.401581	0.14406	0.572357	0.633533	0.563192		4	4	15	7	8		-0.717238	-0.516978	-1.42666		-1.40286	-0.678487		0.517408	0.621649	0.192266		0.17908	0.509397		0.658585	0.754553	0.23577
Cpaa	105	4.14214	3.56979	4.94513	4.54757	5.16378	7.43506	1.38527	.	1.1355	n.s.	1.63495	n.s.	1.18162	1.36748	2.37689	2.17467	2.5079	2.22545	0.294182	0.395042	0.48453	0.489073	0.491743	0.318025	8	8	31	11	20	4	-0.89574	-1.20023	-2.1528	-3.18596	-2.13237	-0.714201	-2.23569	0.385847	0.246748	0.0420119	0.0313856	0.0459502	0.482169	0.0730282	0.566527	0.504972	0.080392	0.132081
Cpap	106	4.55016	3.81428	4.50144	4.09065	4.75247	8.32632	1.18015	n.s.	1.16179	n.s.	2.03545	n.s.	3.09585	1.93142	2.6962	2.93529	2.59407	2.55588	0.701644	0.52445	0.604128	0.733869	0.553417	0.326149	8	7	29	11	18	4	-0.559331	-0.240903	-0.985251	-3.06577	-0.776272	-0.615248	-2.72482	0.586333	0.812702	0.340335	0.0278411	0.452159	0.545598	0.0336116	0.712558	0.884305	0.378863	0.132081
Cppa	107	3.15767	3.3275	4.53539	4.42132	4.61143		1.363	n.s.	1.043	n.s.			1.03032	1.0853	1.81041	1.95856	1.82264		0.346684	0.346547	0.405826	0.461438	0.406222		4	4	15	6	9		0.226964	-1.13194	-1.57614		-1.68647	-0.18931		0.828006	0.290928	0.147386		0.129525	0.85353		0.867671	0.544715	0.193239
Cppp	108				4.11627	4.06024				0.986387	n.s.						2.45119	1.06947					0.620301	0.270718					6	9							0.0527477							0.959569
ABalaaaa	109	4.27857	1.68445	3.42896	2.5968	4.14224		2.03565	*	1.59513	n.s.			2.02947	0.118343	1.92245	1.42481	2.10092		0.50398	0.0746472	0.571434	0.57154	0.525309		4	4	13	6	7		-2.55211	-1.56043	-3.0866		-3.25185	-1.57004		0.0832262	0.178236	0.0211779		0.00673728	0.145948		0.355762	0.436082	0.0520623
ABalaaap	110	7.21432	2.54167	3.44719	3.59067	3.30371		1.35627	n.s.	0.920082	n.s.			4.88556	1.10764	2.82543	3.75699	1.77019		0.719528	0.457582	0.834269	1.08369	0.554955		4	5	14	7	7		-1.87469	-0.697506	-0.915384		-1.00268	0.182807		0.150464	0.506846	0.381718		0.330406	0.859216		0.364556	0.670713	0.422276
ABalaapa	111	7.8802	3.10608	5.86512	5.36609	6.2394		1.88827	*	1.16275	n.s.			4.66971	1.00751	2.84904	3.86864	2.00265		0.629624	0.344639	0.494434	0.750983	0.330999		4	4	14	6	8		-1.99873	-1.36329	-3.60581		-3.02197	-0.504565		0.131676	0.221994	0.00484923		0.00874939	0.629336		0.355762	0.465129	0.0198677
ABalaapp	112	7.66355	3.7713	5.22781	4.37351	5.97531		1.38621	n.s.	1.36625	n.s.			3.76877	1.28842	2.82238	3.29714	2.29023		0.522514	0.362992	0.548876	0.780813	0.395259		4	4	15	7	8		-1.95447	-0.42927	-2.13005		-1.49744	-1.07782		0.128229	0.678487	0.060002		0.16112	0.305194		0.355762	0.791422	0.101617
ABalapaa	113	5.7807	3.57119	4.76579	4.53941	4.99217		1.33451	n.s.	1.09974	n.s.			3.6772	1.79823	2.40932	2.35825	2.62606		0.675874	0.535009	0.514572	0.538059	0.544823		4	4	14	7	7		-1.07956	-0.764755	-1.06103		-1.0802	-0.339394		0.336436	0.4665	0.317977		0.318647	0.740245		0.531101	0.66213	0.356215
ABalapap	114	4.78876	4.09352	4.43128	4.34574	4.50613		1.08251	n.s.	1.03691	n.s.			3.12939	1.80432	2.55165	1.8254	3.18623		0.686162	0.462814	0.585424	0.435045	0.729183		5	5	15	7	8		-0.430362	-0.23757	-0.297765		-0.324234	-0.121416		0.681061	0.817631	0.771445		0.752535	0.905481		0.764011	0.884305	0.79819
ABalappa	115	6.77957	2.68045	4.02191	3.67821	4.3656		1.50046	n.s.	1.18688	n.s.			3.0102	1.27698	2.55768	2.56736	2.70311		0.47176	0.506182	0.647294	0.722918	0.641299		4	4	14	7	7		-2.50722	-0.858967	-1.39871		-1.43413	-0.487831		0.0655511	0.412747	0.195804		0.180361	0.634484		0.355762	0.628283	0.237379
ABalappp	116	5.0695	3.01276	4.3153	3.71419	4.78282		1.43234	n.s.	1.28772	n.s.			2.2216	1.23148	2.77877	2.44904	3.06879		0.460141	0.429192	0.653996	0.682924	0.659451		5	5	16	7	9		-1.81056	-0.651219	-1.52359		-1.46927	-0.774611		0.118239	0.530734	0.154869		0.161108	0.451478		0.355762	0.683167	0.200087
ABalpaaa	117	3.29822	2.07445	4.28834	2.64664	5.56522		2.06722	n.s.	2.10275	.			1.28939	2.11249	2.61092	1.38644	2.67348		0.415369	1.08198	0.618354	0.542558	0.493735		4	4	16	7	9		-0.988942	-0.48528	-2.52595		-1.78301	-2.82312		0.368424	0.650066	0.0377809		0.128691	0.0148551		0.555812	0.775869	0.0743024
ABalpaap	118	3.2312	1.64842	3.91533	2.37552	5.14719		2.3752	*	2.16676	n.s.			1.18876	0.874761	2.79988	0.869724	3.22888		0.38104	0.5572	0.725038	0.377561	0.642992		7	5	18	8	10		-2.65677	-1.46124	-3.19979		-2.95488	-2.59919		0.0241097	0.179521	0.00820125		0.00772995	0.0254135		0.355762	0.436082	0.0284107
ABalpapa	119	2.67841	3.02316	4.59901	3.09276	5.93789		1.52126	n.s.	1.91993	n.s.			0.963155	1.14756	2.88522	1.33468	3.28707		0.374583	0.398569	0.636583	0.445035	0.568952		6	5	17	8	9		0.533239	-0.0998319	-2.40902		-1.81593	-2.38489		0.608543	0.922517	0.0349577		0.0865122	0.0365401		0.724456	0.943971	0.0711209
ABalpapp	120	3.52553	2.74682	4.40931	3.21925	5.20268		1.60524	.	1.61611	n.s.			1.3444	0.945908	2.77555	1.17468	3.27286		0.39325	0.361583	0.637345	0.376297	0.642179		8	5	20	8	12		-1.22381	-0.79692	-2.37241		-2.21344	-1.92184		0.247253	0.443868	0.0322328		0.0385791	0.074103		0.475486	0.645626	0.0679192
ABalppaa	121	5.45907	2.62588	5.88062	4.7449	6.87438		2.23948	*	1.44879	n.s.			0.84718	1.55184	2.00515	1.14208	2.12243		0.164887	0.627915	0.346659	0.249294	0.318393		4	4	15	7	8		-3.20491	-2.38651	-3.93592		-3.48926	-2.45986		0.0265065	0.0635957	0.00414253		0.0129579	0.0316963		0.355762	0.342895	0.0178836
ABalppap	122	5.39873	2.44865	5.14546	4.23817	5.85113		2.10135	**	1.38058	n.s.			2.39831	0.953091	2.184	1.52528	2.43273		0.472	0.408694	0.431085	0.372744	0.427319		4	5	16	7	9		-2.31806	-2.49599	-3.71407		-3.89335	-1.62115		0.0854947	0.0318588	0.00326442		0.00126028	0.128058		0.355762	0.325841	0.0152053
ABalpppa	123	5.06244	2.2566	3.77011	3.5943	3.92639		1.67071	n.s.	1.09239	n.s.			2.32223	1.48845	2.25642	2.7418	1.88326		0.481654	0.692581	0.607304	0.786657	0.492966		5	5	17	8	9		-2.27461	-1.13758	-1.82496		-1.75635	-0.287548		0.0581059	0.279656	0.0972999		0.1093	0.77851		0.355762	0.529242	0.140017
ABalpppp	124	5.22699	2.42883	3.57072	3.22474	3.80138		1.47014	n.s.	1.17882	n.s.			1.25542	1.25681	2.29	2.78934	1.99041		0.250188	0.543326	0.649343	0.89201	0.534511		6	5	20	8	12		-3.67863	-0.70118	-1.70762		-1.50182	-0.505217		0.00545583	0.498621	0.11348		0.159646	0.622787		0.238693	0.670713	0.155705
ABaraaaa	125	7.36059	2.55584	4.28046	3.81292	4.74801		1.67478	n.s.	1.24524	n.s.			3.355	1.0675	3.01029	2.72256	3.42222		0.484294	0.443773	0.715821	0.739537	0.746512		4	4	14	7	7		-2.7294	-1.08442	-1.56664		-1.78627	-0.565734		0.0588569	0.30818	0.15696		0.0947517	0.582517		0.355762	0.553926	0.201319
ABaraaap	126	8.35484	2.34419	5.12206	4.56519	5.61705		2.185	.	1.23041	n.s.			4.91784	1.63837	3.40609	3.91011	3.03962		0.613147	0.733854	0.674764	0.883272	0.556173		6	5	17	8	9		-2.81237	-1.41953	-2.6175		-2.5157	-0.613696		0.0291939	0.185888	0.0224955		0.0240309	0.549842		0.355762	0.436082	0.0545438
ABaraapa	127	6.55859	2.63072	5.53696	4.56246	6.31657		2.10473	*	1.38446	n.s.			3.45781	1.43058	3.34421	2.35034	3.91265		0.553579	0.577785	0.612367	0.531245	0.634913		5	4	18	8	10		-2.30536	-1.76186	-2.57902		-2.7304	-1.17691		0.064099	0.110848	0.0241415		0.0186542	0.257546		0.355762	0.42097	0.0569739
ABaraapp	128	8.14329	2.39789	5.41176	4.94444	5.77523		2.25688	*	1.16802	n.s.			2.92224	1.04521	3.24894	2.83262	3.66528		0.373805	0.457683	0.609729	0.59335	0.652285		6	5	16	7	9		-4.48402	-2.17985	-2.58181		-3.21605	-0.511416		0.00347685	0.0606048	0.0271677		0.00458565	0.617031		0.202816	0.342895	0.0601086
ABarapaa	129	11.7088	2.64751	7.02669	6.59091	7.46247		2.65407	*	1.13224	n.s.			5.37144	1.99098	4.36384	4.98813	3.93588		0.481691	0.78962	0.630742	0.78047	0.543905		5	5	16	8	8		-3.53695	-1.99605	-2.91458		-3.1098	-0.387972		0.0161888	0.0741656	0.0143856		0.00689173	0.704184		0.355762	0.342895	0.0397853
ABarapap	130	10.6955	2.52447	6.12054	5.79749	6.40769		2.42448	*	1.10525	n.s.			5.9836	1.74113	3.83215	4.49209	3.39368		0.582762	0.724186	0.63532	0.799047	0.544337		6	5	17	8	9		-3.18695	-1.85041	-2.82764		-2.96583	-0.312942		0.0189508	0.0946487	0.0152507		0.00930103	0.759296		0.355762	0.386481	0.0408996
ABarappa	131	9.9105	4.65463	6.16622	5.34936	6.98309		1.32475	n.s.	1.30541	n.s.			6.06345	2.42338	3.3611	4.18817	2.3193		0.642412	0.553179	0.554817	0.81089	0.343994		5	4	14	7	7		-1.76961	-0.348498	-1.55693		-1.00215	-0.902862		0.132003	0.735526	0.169504		0.350912	0.389235		0.355762	0.835177	0.214301
ABarappp	132	8.5966	3.91521	7.5963	6.07946	8.77607		1.9402	*	1.44356	n.s.			5.31101	1.64581	3.75317	3.47597	3.71092		0.648694	0.441381	0.501799	0.592177	0.434591		5	5	16	7	9		-1.88266	-1.43716	-3.37703		-3.08679	-1.49439		0.121378	0.184426	0.00566753		0.00700231	0.158186		0.355762	0.436082	0.0213437
ABarpaaa	133	6.66287	4.87315	5.6638	5.8867	5.49663		1.16225	n.s.	0.933737	n.s.			1.61189	1.17804	2.32969	2.56339	2.30466		0.257041	0.25685	0.418675	0.453599	0.432389		4	4	14	6	8		-1.79287	-0.844004	-0.620114		-0.922471	0.294102		0.1277	0.425014	0.549173		0.377106	0.774568		0.355762	0.633918	0.589089
ABarpaap	134	5.60658	3.77836	5.40819	4.14104	6.32975		1.43136	n.s.	1.52854	n.s.			2.54285	0.882752	3.47063	2.20954	4.00567		0.469746	0.241978	0.650181	0.550245	0.647214		7	7	19	8	11		-1.797	-0.426955	-2.03624		-1.88791	-1.52165		0.112949	0.679004	0.0654852		0.0718477	0.147501		0.355762	0.791422	0.108326
ABarpapa	135	6.75247	4.33849	5.12067	4.74384	5.55133		1.18029	n.s.	1.17022	n.s.			4.53698	0.490676	2.7085	2.99224	2.50316		0.705494	0.120167	0.537751	0.650475	0.467017		5	4	15	8	7		-1.18114	-0.373247	-1.24088		-1.05539	-0.568951		0.301258	0.719003	0.255906		0.306461	0.579098		0.509445	0.827089	0.296048
ABarpapp	136	6.81964	3.23261	5.42619	4.57786	6.18026		1.67858	*	1.35003	n.s.			4.17286	0.657292	3.37513	2.48248	4.00391		0.642482	0.213498	0.631155	0.559227	0.66585		5	5	17	8	9		-1.89874	-1.45338	-2.15689		-2.52204	-1.00315		0.127052	0.182135	0.0602038		0.0206894	0.3334		0.355762	0.436082	0.101617
ABarppaa	137	6.87705	5.42719	6.04731	5.31321	6.68964		1.11426	n.s.	1.25906	n.s.			2.16168	2.0262	3.87103	1.46255	5.20825		0.333978	0.392009	0.650794	0.285097	0.802884		4	5	15	7	8		-1.02796	0.107382	-0.615148		-0.459651	-0.71593		0.341538	0.917544	0.552479		0.652918	0.49382		0.532489	0.943971	0.589089
ABarppap	138	6.32497	5.60493	6.54348	5.37354	7.56718		1.16745	n.s.	1.40823	n.s.			0.993185	0.71789	5.29556	1.64904	7.15462		0.16684	0.136087	0.822775	0.317842	0.975026		4	4	15	7	8		-1.17511	0.321712	-0.768039		-0.663925	-0.842024		0.288616	0.755247	0.466649		0.516401	0.424707		0.500078	0.849965	0.50364
ABarpppa	139	7.11116	3.81495	6.01122	4.59036	7.43207		1.5757	.	1.61906	n.s.			2.83002	0.66914	4.14953	2.01925	5.31085		0.422842	0.18417	0.701084	0.453635	0.736917		4	5	16	8	8		-2.27905	-1.00171	-1.90238		-2.03418	-1.41462		0.0997382	0.342157	0.0968563		0.0576952	0.190895		0.355762	0.579035	0.140017
ABarpppp	140	5.71502	3.22909	6.32303	4.61091	7.82114		1.95815	n.s.	1.69623	n.s.			2.80203	1.57806	5.13957	1.67879	6.70212		0.520936	0.519246	0.826381	0.377095	0.883702		4	4	15	7	8		-1.54605	-1.36473	-1.83868		-2.004	-1.30868		0.186055	0.21622	0.101494		0.0620859	0.227021		0.374254	0.464081	0.143715
ABplaaaa	141	6.20856	2.95566	6.31138	5.44547	7.1773		2.13535	*	1.31803	n.s.			3.85024	1.20705	3.20767	2.3978	3.81901		0.651157	0.428804	0.516177	0.45409	0.548724		5	5	16	8	8		-1.80265	-2.47736	-2.9032		-3.4714	-1.08627		0.134012	0.031196	0.017477		0.00274341	0.299096		0.355762	0.325841	0.0454916
ABplaaap	142	7.22975	3.137	5.55901	5.47677	5.64125		1.77208	*	1.03003	n.s.			3.81124	1.16147	2.1135	2.13424	2.23639		0.553518	0.38876	0.386134	0.401867	0.408824		5	5	16	8	8		-2.29695	-2.55416	-2.64711		-3.26888	-0.150495		0.0729581	0.0269374	0.0229896		0.00616824	0.882525		0.355762	0.325841	0.0549885
ABplaapa	143	6.04874	2.51701	5.84661	5.13107	6.56215		2.32283	*	1.27891	n.s.			4.36194	1.11335	4.35724	3.32385	5.33526		0.743667	0.460759	0.756904	0.668033	0.838443		8	6	16	8	8		-2.19667	-2.07465	-2.08481		-2.82089	-0.643934		0.0585642	0.0679541	0.0714756		0.0109323	0.532016		0.355762	0.342895	0.116066
ABplaapp	144	5.97761	2.3787	4.93277	4.98957	4.89491		2.07373	*	0.981029	n.s.			3.4021	0.55862	3.54182	3.42519	3.76803		0.586926	0.24323	0.726992	0.707923	0.785822		8	7	20	8	12		-2.94699	-2.12394	-2.27087		-3.11611	0.0581517		0.0200962	0.0690679	0.0426941		0.00513487	0.954341		0.355762	0.342895	0.080392
ABplapaa	145	8.46585	4.79303	6.27369	6.27192	6.27547		1.30892	n.s.	1.00057	n.s.			3.94668	1.61892	3.63286	2.78161	4.53248		0.489497	0.354653	0.588111	0.457362	0.744825		5	5	16	8	8		-1.92523	-1.211	-0.843041		-1.27481	-0.00188762		0.10881	0.251286	0.420011		0.220629	0.998526		0.355762	0.50835	0.456085
ABplapap	146	6.09611	4.28682	5.11367	5.44806	4.77927		1.19288	n.s.	0.877243	n.s.			3.78069	1.23912	3.8924	3.49846	4.46891		0.64233	0.303506	0.77307	0.662216	0.964281		7	5	16	8	8		-1.1805	-0.856782	-0.294118		-0.738376	0.333299		0.27307	0.412814	0.775643		0.469373	0.744129		0.479288	0.628283	0.79819
ABplappa	147	7.08883	3.61715	5.50513	5.694	5.31625		1.52195	n.s.	0.933658	n.s.			5.96241	0.823551	3.93705	4.15462	3.98404		0.883155	0.237166	0.726334	0.752449	0.772828		5	6	16	8	8		-1.29175	-1.37826	-1.1733		-1.81518	0.185617		0.264034	0.20673	0.275322		0.0862219	0.855412		0.479288	0.458353	0.316442
ABplappp	148	8.47979	5.07776	7.29327	7.57866	7.04354		1.43632	n.s.	0.929391	n.s.			4.57192	1.08947	3.8797	3.78558	4.20334		0.572852	0.227967	0.540823	0.517345	0.615414		4	4	15	7	8		-1.44769	-1.63351	-1.24197		-1.94298	0.259398		0.234607	0.143261	0.246889		0.069081	0.799397		0.45618	0.435801	0.288315
ABplpaaa	149	8.28225	3.34471	5.97252	5.09959	6.84545		1.78566	.	1.34235	n.s.			4.07752	1.21992	4.17407	3.07266	5.11388		0.523091	0.382968	0.709799	0.621359	0.770393		4	5	16	8	8		-2.33952	-1.44358	-1.85367		-2.23164	-0.827697		0.0902664	0.179816	0.0999428		0.0378807	0.424727		0.355762	0.436082	0.14266
ABplpaap	150	10.0952	3.73974	5.52101	5.73869	5.35171		1.47631	n.s.	0.932567	n.s.			6.10697	0.649407	4.16164	4.28712	4.31455		0.642745	0.182333	0.76556	0.773736	0.828595		4	5	16	7	9		-2.07204	-1.21428	-1.09866		-1.64905	0.178613		0.128369	0.267654	0.301596		0.11745	0.860978		0.355762	0.523412	0.340016
ABplpapa	151	8.95302	3.97343	6.23109	5.59738	6.72397		1.56819	n.s.	1.20127	n.s.			5.42921	1.41522	3.8461	3.29428	4.35569		0.644312	0.373979	0.626889	0.609558	0.66578		4	5	16	7	9		-1.78646	-1.16267	-1.73662		-1.96126	-0.589016		0.16288	0.276083	0.111472		0.0654331	0.565235		0.364556	0.528158	0.154145
ABplpapp	152	5.8238	3.52884	5.96977	5.1907	6.53637		1.69171	.	1.25925	n.s.			4.42748	1.37954	3.93673	3.94562	4.01993		0.791916	0.410479	0.668121	0.783887	0.628988		6	5	19	8	11		-1.20161	-1.08951	-2.21136		-2.2317	-0.72818		0.273879	0.30313	0.0447134		0.0375115	0.477423		0.479288	0.553926	0.0833081
ABplppaa	153	8.8598	4.63249	7.53006	7.66084	7.43198		1.62549	*	0.970126	n.s.			4.98876	0.532374	4.01114	4.6309	3.81265		0.591232	0.122105	0.542195	0.629676	0.529038		5	4	14	6	8		-1.88143	-1.58619	-2.03746		-2.62325	0.0985672		0.131088	0.171352	0.078175		0.0196759	0.923509		0.355762	0.436082	0.125791
ABplppap	154	9.24634	2.80945	6.1253	6.29523	5.97661		2.18025	*	0.949388	n.s.			5.31283	1.17109	4.30569	5.12697	3.80698		0.610499	0.44289	0.71465	0.843507	0.656884		4	4	15	7	8		-2.36634	-1.72193	-2.15773		-2.63896	0.13504		0.091151	0.128581	0.0588418		0.0173467	0.895021		0.355762	0.42097	0.101617
ABplpppa	155	6.76394	4.015	6.69847	5.59623	7.55576		1.66836	n.s.	1.35015	n.s.			4.0195	1.07364	5.21232	5.37719	5.23117		0.631396	0.284121	0.790295	0.995175	0.711573		4	4	16	7	9		-1.32147	-0.752221	-1.94069		-1.90408	-0.731739		0.267671	0.477142	0.0829609		0.0730652	0.477452		0.479288	0.664917	0.128808
ABplpppa.1	156	6.76394	4.015	6.69847	5.59623	7.55576		1.66836	n.s.	1.35015	n.s.			4.0195	1.07364	5.21232	5.37719	5.23117		0.631396	0.284121	0.790295	0.995175	0.711573		4	4	16	7	9		-1.32147	-0.752221	-1.94069		-1.90408	-0.731739		0.267671	0.477142	0.0829609		0.0730652	0.477452		0.479288	0.664917	0.128808
ABplpppp	157	11.0479	3.6702	6.32733	5.63984	6.86204		1.72397	.	1.21671	n.s.			5.37161	1.37153	4.25241	4.70398	4.07121		0.516601	0.397049	0.682571	0.86385	0.609775		4	4	16	7	9		-2.66152	-1.0336	-2.09921		-2.10034	-0.546437		0.0669897	0.333159	0.0602815		0.0517797	0.594798		0.355762	0.569281	0.101617
ABpraaaa	158	12.87	3.33487	5.80092	5.53055	6.07129		1.73948	n.s.	1.09777	n.s.			6.31572	1.46631	4.42503	4.9882	4.16804		0.521403	0.467173	0.776437	0.934148	0.711035		4	4	14	7	7		-2.94126	-1.08541	-1.57481		-1.77228	-0.220091		0.0532755	0.310946	0.153396		0.0963994	0.829616		0.355762	0.553926	0.199641
ABpraaap	159	9.57966	3.11122	5.91887	6.04219	5.77794		1.90243	.	0.956265	n.s.			6.63438	1.15173	3.86385	3.58079	4.45338		0.727176	0.393323	0.663681	0.61115	0.798283		5	4	15	8	7		-2.1402	-2.10737	-1.499		-2.43738	0.125468		0.0942811	0.0634581	0.175889		0.0265292	0.902312		0.355762	0.342895	0.217709
ABpraapa	160	7.36546	3.85282	6.06303	5.08355	6.92008		1.57366	n.s.	1.36127	n.s.			6.02883	1.12133	3.9094	4.35604	3.53606		0.859454	0.309233	0.65554	0.887493	0.526953		5	4	15	7	8		-1.27554	-0.707612	-2.23864		-1.91417	-0.888379		0.266083	0.501216	0.0512548		0.0730009	0.392376		0.479288	0.670713	0.0925725
ABpraapp	161	5.3235	3.29196	6.56093	4.42823	8.26708		1.99301	.	1.8669	n.s.			4.98695	0.364286	5.56765	3.68032	6.38285		0.970238	0.116192	0.860393	0.857075	0.791382		7	5	18	8	10		-1.07379	-0.866487	-2.45685		-2.47203	-1.59853		0.323612	0.414096	0.036025		0.0239525	0.131111		0.529271	0.628283	0.0719654
ABprapaa	162	9.15704	3.64056	5.35222	4.87781	5.72121		1.47017	n.s.	1.17291	n.s.			4.91987	0.741301	4.2458	4.35109	4.38762		0.570857	0.213804	0.805673	0.923875	0.788206		4	5	16	7	9		-2.22244	-0.737496	-1.38744		-1.53925	-0.383224		0.109652	0.486654	0.199447		0.141684	0.707701		0.355762	0.669149	0.24015
ABprapap	163	5.40586	3.85153	5.6293	4.04763	7.21097		1.46158	n.s.	1.78153	n.s.			3.42582	1.18662	4.50114	3.04272	5.33277		0.660128	0.323495	0.812084	0.775221	0.762647		6	5	16	8	8		-1.03908	-0.163486	-1.71516		-1.42892	-1.45727		0.336546	0.873456	0.124356		0.16934	0.172694		0.531101	0.920529	0.165496
ABprappa	164	7.36307	2.54683	5.8653	4.87927	6.85133		2.30298	.	1.40417	n.s.			4.28073	1.45709	4.19692	3.76609	4.65962		0.610447	0.607876	0.728329	0.799421	0.704394		5	4	14	7	7		-2.35129	-1.45864	-2.2585		-2.48108	-0.870861		0.0644497	0.18101	0.0547831		0.0255854	0.401653		0.355762	0.436082	0.097185
ABprappp	165	6.02868	2.54578	6.23773	3.63355	8.46987		2.45022	n.s.	2.33102	n.s.			3.23065	0.399461	6.58757	2.1457	8.38814		0.569372	0.166718	1.07639	0.615128	1.02572		4	4	13	6	7		-2.13987	-1.21072	-1.86486		-2.00873	-1.47036		0.119188	0.275376	0.111086		0.0670714	0.185519		0.355762	0.528158	0.154145
ABprpaaa	166	8.97588	3.45991	5.91186	5.80197	6.03745		1.70868	n.s.	1.04059	n.s.			6.87968	1.72065	3.4454	4.07856	2.87349		0.804786	0.528393	0.592509	0.724929	0.492942		5	4	15	8	7		-1.7266	-1.3948	-1.86031		-1.98128	-0.13044		0.149733	0.193478	0.09617		0.0748296	0.898294		0.364556	0.442236	0.140017
ABprpaap	167	9.16033	2.85478	6.23469	6.45742	6.03981		2.18395	*	0.935328	n.s.			6.15165	1.01219	3.99932	5.23745	2.89551		0.705131	0.376718	0.652154	0.840042	0.494386		5	4	15	7	8		-2.25418	-1.7632	-2.78903		-2.93912	0.187388		0.0830278	0.122801	0.020034		0.00918365	0.855476		0.355762	0.42097	0.049944
ABprpapa	168	10.6332	3.41125	6.47786	5.65825	7.29747		1.89897	n.s.	1.2897	n.s.			6.73149	2.12001	4.68018	5.29412	4.16823		0.664715	0.652551	0.733777	0.964885	0.589038		5	5	16	8	8		-2.2882	-1.07093	-2.21775		-2.03633	-0.688089		0.0731647	0.309586	0.0490615		0.0589148	0.503249		0.355762	0.553926	0.0895246
ABprpapp	169	9.58284	2.94685	5.9488	5.46622	6.2866		2.0187	*	1.15008	n.s.			5.98412	1.46713	3.43815	4.13806	3.04816		0.655685	0.522759	0.586457	0.784061	0.496989		5	5	17	7	10		-2.40833	-1.4854	-2.86421		-2.82921	-0.446536		0.0668667	0.176072	0.0132941		0.0117916	0.664346		0.355762	0.436082	0.0373502
ABprppaa	170	14.0766	3.24184	6.98852	7.46358	6.58133		2.15573	.	0.881792	n.s.			6.72398	1.6632	4.78887	5.87858	4.08037		0.507524	0.545107	0.698426	0.820453	0.642135		4	4	13	6	7		-3.12845	-1.66216	-1.90593		-2.39091	0.309267		0.0446014	0.146527	0.0907527		0.0309712	0.764364		0.355762	0.436082	0.136129
ABprppap	171	9.24326	3.25484	6.40568	5.91399	6.89736		1.96805	.	1.16628	n.s.			4.74808	1.46968	3.74604	2.96785	4.58609		0.545786	0.479757	0.595243	0.519758	0.688651		4	4	14	7	7		-2.40966	-1.98296	-1.93472		-2.5371	-0.476279		0.0813218	0.0788409	0.0897937		0.0240811	0.643841		0.355762	0.3469	0.135842
ABprpppa	172	5.14835	2.17414	5.5514	4.55898	6.29572		2.55338	*	1.38095	n.s.			3.44457	1.39148	3.16586	1.58317	3.91738		0.702516	0.680014	0.580465	0.361734	0.641674		5	4	14	6	8		-1.75959	-2.51134	-2.6592		-3.08306	-1.13633		0.133515	0.039431	0.0248182		0.00927895	0.283021		0.355762	0.325841	0.0577594
ABprpppp	173	7.59818	1.93047	6.02034	5.91843	6.1095		3.11859	**	1.03228	n.s.			5.26021	0.680303	3.76586	2.59511	4.75094		0.726913	0.374428	0.635948	0.454139	0.801932		5	4	15	7	8		-2.38449	-3.84136	-2.43845		-3.97028	-0.0982297		0.0730432	0.00584641	0.0423781		0.00104292	0.923504		0.355762	0.241438	0.080392
MSaaaa	174	2.0585	1.89496	3.90734	2.54206	5.10196		2.06196	*	2.00702	n.s.			0.693966	0.493286	2.74537	1.10456	3.24551		0.358192	0.276584	0.714329	0.450032	0.65601		4	4	15	7	8		-0.38415	-1.33449	-2.73245		-2.68125	-2.09648		0.715494	0.215615	0.0269375		0.0160934	0.0661994		0.782572	0.464081	0.0601086
MSaaap	175	3.12033	2.67548	3.63157	3.05179	4.21136		1.35735	n.s.	1.37997	n.s.			0.598808	0.956718	1.75026	1.22753	2.08476		0.203899	0.379936	0.490563	0.416598	0.512711		4	4	14	7	7		-0.788277	-0.564683	-1.66617		-1.42901	-1.26811		0.465992	0.58809	0.130653		0.185114	0.234308		0.631858	0.728901	0.172579
MSaapa	176	7.45378	3.08483	4.79681	4.90955	4.69817		1.55497	n.s.	0.956945	n.s.			2.65238	1.90653	2.35826	1.82407	2.87177		0.378084	0.656661	0.499824	0.384804	0.630354		4	4	15	7	8		-2.67501	-1.55104	-1.15843		-1.5135	0.172238		0.0404504	0.170898	0.277129		0.183097	0.866127		0.355762	0.436082	0.316463
MSaapp	177				5.84724	4.68273				0.800845	n.s.						2.52973	1.66892					0.454269	0.371248					5	6							0.881765							0.408332
MSapaa	178				4.47592	7.87388				1.75917	n.s.						3.43338	5.46325					0.805431	0.718624					5	7							-1.32051							0.216319
MSapap	179				5.45535	7.66177				1.40445	n.s.						5.36705	5.9666					1.03301	0.806562					5	7							-0.669943							0.519127
MSappa	180				5.43391	5.9038				1.08647	n.s.						3.54832	4.21151					0.685645	0.738833					5	7							-0.209058							0.838767
MSappp	181				7.2319	7.62624				1.05453	n.s.						5.20097	5.16699					0.764118	0.701726					4	7							-0.121253							0.907248
MSpaaa	182	4.87263	3.08023	5.47788	3.4127	7.28491		1.7784	n.s.	2.13465	n.s.			2.66971	1.53536	3.62373	2.98184	3.26265		0.582143	0.529611	0.672546	0.904953	0.461859		4	4	15	7	8		-1.164	-0.243806	-3.03451		-1.98108	-2.40108		0.299118	0.812854	0.0125831		0.0698682	0.0320701		0.509445	0.884305	0.0359226
MSpaap	183				3.62038	5.95739				1.64552	n.s.						1.27846	2.89754					0.367843	0.503749					6	7							-1.92635							0.0880483
MSpapa	184	7.30514	4.70201	6.23834	5.50491	6.8801		1.32674	n.s.	1.24981	n.s.			3.00882	1.85677	3.08908	2.10115	3.78048		0.43762	0.419569	0.503429	0.395318	0.566652		4	4	15	7	8		-1.47252	-0.657195	-1.33839		-1.25523	-0.884517		0.200916	0.531783	0.21049		0.244333	0.395028		0.39506	0.683167	0.248379
MSpapp	185	7.04799	4.73923	7.43804				1.56946	n.s.					2.15593	2.15386	3.5299				0.325011	0.48288	0.486439				4	4	10				-1.51519		-1.70331		-1.73997			0.180503		0.122818		0.114694			0.374254		0.164687
MSppaa	186				6.03849	9.56692				1.58432	n.s.						2.20948	3.70689					0.381145	0.401308					6	7							-2.11749							0.0604064
MSppap	187				6.11853	9.74274				1.59233	n.s.						1.17379	4.46953					0.199835	0.475139					6	7							-2.06393							0.0781969
MSpppa	188				5.54278	9.1978				1.65942	n.s.						2.34045	4.54843					0.443364	0.512175					5	7							-1.81597							0.101526
MSpppp	189				5.43634	10.1815				1.87286	n.s.						1.24152	4.16292					0.239793	0.423472					5	7							-2.84394							0.0234428
Eala	190
Ealp	191
Eara	192
Earp	193
Epla	194
Eplp	195
Epra	196
Eprp	197
Z2	198				5.07281	6.28136				1.23824	n.s.						2.16673	1.63335					0.453822	0.273033					4	5							-0.924943							0.393797
Z3	199
Daa	200
Dap	201
Dpa	202
[truncated: 7 more columns]

## Sheet: pAP
	Order	WT.mean	C.mean	EQ.mean	EA.mean	ED.mean	INV.mean	EQ.over.C	EQ.C.sign	ED.over.EA	ED.EA.sign	INV.over.EA	INV.EA.sign	WT.sd	C.sd	EQ.sd	EA.sd	ED.sd	INV.sd	WT.vc	C.vc	EQ.vc	EA.vc	ED.vc	INV.vc	WT.n	C.n	EQ.n	EA.n	ED.n	INV.n	C.vs.WT.t.stat	C.vs.EA.t.stat	C.vs.ED.t.stat	C.vs.INV.t.stat	C.vs.EQ.t.stat	EA.vs.ED.t.stat	EA.vs.INV.t.stat	C.vs.WT.p.val	C.vs.EA.p.val	C.vs.ED.p.val	C.vs.INV.p.val	C.vs.EQ.p.val	EA.vs.ED.p.val	EA.vs.INV.p.val	C.vs.WT.p.adj	C.vs.EA.p.adj	C.vs.ED.p.adj	C.vs.INV.p.adj
AB	1
P1	2
ABa	3		0.219272	0.180633	0.186715	0.173537		0.823783	n.s.	0.929425	n.s.				0.0515264	0.0401134	0.0533439	0.0183008			0.243381	0.226342	0.295901	0.109851			7	13	7	6			1.16144	2.19257		1.72275	0.612853			0.268071	0.0609916		0.115594	0.557886			0.602435	0.217827
ABp	4		0.488818	0.462767	0.455978	0.470688		0.946707	n.s.	1.03226	n.s.				0.028266	0.032525	0.0401664	0.0215196			0.0598904	0.0716354	0.0912344	0.0476244			7	13	7	6			1.769	1.31074		1.86306	-0.838614			0.105157	0.216926		0.0835103	0.422448			0.374455	0.372362
EMS	5		0.577437	0.571015	0.58713	0.552215		0.988879	n.s.	0.940532	n.s.				0.0401289	0.0247469	0.0180797	0.0170239			0.0719769	0.0441718	0.0318931	0.0321129			7	13	7	6			-0.582669	1.51178		0.385736	3.58227			0.575529	0.167504		0.709135	0.00437978			0.828259	0.311842
P2	6		0.82382	0.817473	0.819963	0.814567		0.992296	n.s.	0.993419	n.s.				0.0232672	0.0230406	0.030509	0.0117606			0.0292517	0.0287272	0.0385366	0.0150395			7	13	7	6			0.265929	0.923454		0.583857	0.431992			0.795119	0.379514		0.569873	0.677192			0.979263	0.524147
ABal	7	0.153599	0.160913	0.166982	0.17227	0.163205	0.172293	1.03771	n.s.	0.947381	n.s.	1.00013	n.s.	0.0138646	0.024411	0.0345018	0.026461	0.0392925	0.0450585	0.0925212	0.15381	0.207696	0.155522	0.242905	0.270863	10	18	48	20	28	7	1.01109	-1.37601	-0.243963	-0.633033	-0.797516	0.954718	-0.00127897	0.321311	0.177324	0.808394	0.545737	0.42951	0.344723	0.999013	0.549442	0.453309	0.862616	0.661706
ABar	8	0.395053	0.308439	0.298697	0.307915	0.292114	0.245161	0.968416	n.s.	0.948685	n.s.	0.796197	.	0.0192592	0.0421094	0.0381576	0.0355809	0.0391887	0.0418726	0.0499697	0.13842	0.128412	0.116999	0.135353	0.176896	10	18	48	20	28	7	-7.43796	0.0412362	1.31827	3.3873	0.858222	1.45366	3.5427	7.79701e-08	0.967352	0.196104	0.00603034	0.398027	0.153248	0.0060425	1.33329e-05	0.990986	0.350187	0.0531766
ABpl	9	0.400367	0.438117	0.413725	0.404236	0.420503	0.398127	0.944326	n.s.	1.04024	n.s.	0.984888	n.s.	0.026298	0.0403506	0.0274983	0.0323528	0.021572	0.0295619	0.0673268	0.0933792	0.0668112	0.081035	0.0517586	0.0769043	10	18	48	20	28	7	2.98804	2.83536	1.70219	2.72539	2.36682	-1.95899	0.458924	0.0061889	0.00780176	0.102012	0.0156019	0.0266643	0.059221	0.654879	0.0962093	0.104424	0.256457	0.0740117
ABpr	10	0.660762	0.612422	0.618357	0.619458	0.617572	0.552833	1.00969	n.s.	0.996956	n.s.	0.892447	.	0.021264	0.0469654	0.0394463	0.0267441	0.0469442	0.0428415	0.0329856	0.0777532	0.0641244	0.043713	0.0766929	0.080262	10	18	48	20	28	7	-3.73222	-0.559219	-0.363038	3.03792	-0.476848	0.17627	3.85969	0.000965869	0.580733	0.718676	0.0103187	0.637377	0.860888	0.00517134	0.0330327	0.828259	0.811498	0.0664001
MS	11	0.481377	0.507741	0.454987	0.464368	0.448287	0.435329	0.896101	*	0.96537	n.s.	0.937466	n.s.	0.0139784	0.0441533	0.063022	0.0349252	0.0770957	0.0277556	0.0297643	0.0882391	0.139235	0.0761503	0.173514	0.0660349	10	17	48	20	28	7	2.27572	3.2725	3.28806	4.83038	3.75453	0.972785	2.22039	0.0335421	0.00266307	0.00201847	0.000138703	0.000548893	0.3365	0.0444767	0.163877	0.0772291	0.0267491	0.00672707
E	12	0.72482	0.756697	0.703481	0.728649	0.685504	0.670465	0.929674	**	0.940788	n.s.	0.920147	*	0.0213845	0.0378846	0.0668451	0.0275911	0.0802375	0.0273146	0.0302408	0.050802	0.0955154	0.0383394	0.118094	0.0421948	10	17	48	20	28	7	2.79411	2.53425	4.01536	6.23939	3.99413	2.63553	4.83785	0.00984651	0.016978	0.000245938	1.32691e-05	0.000213024	0.0123978	0.000575305	0.113562	0.134281	0.00860782	0.0012871
C	13	0.669927	0.655494	0.655813	0.629102	0.674893	0.711692	1.00049	n.s.	1.07279	n.s.	1.13128	n.s.	0.0218853	0.0312427	0.0630876	0.031906	0.0728411	0.086192	0.0334848	0.0483637	0.0966985	0.0513507	0.108894	0.125434	10	17	48	20	28	7	-1.40636	2.53588	-1.23451	-1.6802	-0.0269232	-2.95337	-2.4765	0.172403	0.0159409	0.22427	0.138997	0.978617	0.00527743	0.044533	0.382884	0.134281	0.381042	0.24968
P3	14	0.901399	0.907423	0.866408	0.879729	0.85737	0.840137	0.954801	***	0.974584	n.s.	0.954995	n.s.	0.0118874	0.0135981	0.0476567	0.0220885	0.0577454	0.0582319	0.0135174	0.0152195	0.0552975	0.0254387	0.0679532	0.0717878	10	16	47	19	28	7	1.18846	4.5384	4.37907	3.02129	5.30026	1.85832	1.75299	0.247782	8.30766e-05	0.000119739	0.0220441	1.73884e-06	0.07103	0.125325	0.466181	0.0142558	0.00815729	0.0829289
ABala	15	0.120176	0.115537	0.118198	0.116201	0.119778	0.110628	1.02303	n.s.	1.03079	n.s.	0.95204	n.s.	0.015364	0.0168406	0.0244781	0.0166955	0.0294976	0.022463	0.131043	0.148189	0.208299	0.145569	0.248833	0.21151	10	15	43	19	24	6	-0.711386	-0.114507	-0.571047	0.483732	-0.464228	-0.501347	0.560763	0.484798	0.909597	0.571438	0.642623	0.645298	0.619056	0.592847	0.694086	0.990986	0.689667	0.716488
ABalp	16	0.217613	0.200574	0.208062	0.199124	0.215137	0.209963	1.03733	n.s.	1.08042	n.s.	1.05444	n.s.	0.0237871	0.0508972	0.0519198	0.0511081	0.0525364	0.0697856	0.112042	0.257722	0.250991	0.260042	0.246743	0.346219	10	16	43	19	24	6	-1.1527	0.0838341	-0.875152	-0.300909	-0.4996	-1.00781	-0.351841	0.261032	0.93371	0.387814	0.772105	0.621346	0.319723	0.735634	0.479961	0.990986	0.530214	0.814068
ABara	17	0.321099	0.308837	0.281812	0.289074	0.276063	0.259544	0.912495	n.s.	0.954993	n.s.	0.897846	n.s.	0.0231928	0.0708278	0.0559819	0.0357577	0.0681484	0.03242	0.0740351	0.232921	0.199805	0.125325	0.249429	0.130116	10	16	43	19	24	6	-0.639808	1.01272	1.45546	2.22976	1.37478	0.805629	1.89641	0.529696	0.322555	0.155461	0.0381462	0.182826	0.425719	0.0896877	0.747414	0.66771	0.292533	0.0971195
ABarp	18	0.42974	0.358294	0.342137	0.334853	0.347904	0.321343	0.954907	n.s.	1.03897	n.s.	0.959655	n.s.	0.0317915	0.0509887	0.0759051	0.0445464	0.0942848	0.042199	0.0758279	0.144533	0.223146	0.134783	0.273831	0.136792	10	16	43	19	24	6	-4.40086	1.43473	0.450089	1.72417	0.938324	-0.598907	0.674444	0.00019071	0.161668	0.65529	0.112919	0.353685	0.553169	0.517287	0.0108705	0.433741	0.762369	0.216416
ABpla	19	0.270277	0.300283	0.276305	0.272077	0.279652	0.262506	0.920147	n.s.	1.02784	n.s.	0.964823	n.s.	0.0185945	0.0355426	0.0417259	0.0409305	0.0429155	0.0586536	0.0705179	0.120213	0.151892	0.152417	0.155059	0.232747	10	16	43	19	24	6	2.81614	2.18184	1.65348	1.4791	2.19403	-0.589852	0.372108	0.00967802	0.0363559	0.106907	0.186348	0.0357598	0.558646	0.721449	0.113562	0.208944	0.256457	0.311652
ABplp	20	0.488132	0.510729	0.493307	0.485157	0.499759	0.492655	0.965887	n.s.	1.0301	n.s.	1.01546	n.s.	0.0190396	0.0421014	0.0524731	0.051967	0.0530678	0.0325608	0.0399802	0.0838077	0.106989	0.108523	0.107293	0.0688464	10	15	43	19	24	6	1.81846	1.58501	0.714857	1.05256	1.29073	-0.906495	-0.419926	0.083387	0.122808	0.479473	0.313267	0.206555	0.370224	0.681005	0.249302	0.395714	0.607834	0.427984
ABpra	21	0.598577	0.56635	0.542449	0.539475	0.544803	0.527579	0.957798	n.s.	1.00988	n.s.	0.977948	n.s.	0.0388446	0.0518417	0.0689774	0.0447582	0.0843055	0.0529367	0.0665172	0.0929667	0.127899	0.0840579	0.156357	0.10452	10	16	43	19	24	6	-1.80478	1.62533	1.00017	1.53857	1.4319	-0.265881	0.497204	0.0841905	0.114582	0.323585	0.158816	0.160863	0.791831	0.633463	0.249302	0.383408	0.478602	0.273127
ABprp	22	0.77784	0.73033	0.708341	0.72106	0.698271	0.570328	0.969892	n.s.	0.968395	n.s.	0.790957	.	0.0211538	0.0385873	0.046136	0.0372128	0.0506328	0.0767306	0.0278754	0.0536611	0.0655112	0.0522875	0.073267	0.140144	10	16	43	19	24	6	-4.04715	0.719557	2.26756	4.88155	1.84163	1.70002	4.64255	0.000475665	0.477092	0.0292514	0.00279355	0.0748233	0.0967371	0.00392004	0.0203347	0.772513	0.150559	0.0320624
MSa	23	0.345441	0.322515	0.32247	0.305868	0.335464	0.286072	0.999862	n.s.	1.09676	n.s.	0.935282	n.s.	0.0231702	0.0232017	0.0545421	0.0329705	0.0645506	0.0331973	0.0687513	0.0733234	0.17017	0.10929	0.194514	0.12088	10	13	41	18	23	6	-2.351	1.64991	-0.867947	2.42902	0.00416807	-1.90424	1.26708	0.0293573	0.109754	0.392245	0.0438557	0.996692	0.0653203	0.238525	0.156878	0.374455	0.532115	0.103756
MSp	24	0.513692	0.508639	0.479926	0.491896	0.470557	0.444918	0.943549	.	0.95662	n.s.	0.904496	n.s.	0.0203336	0.024331	0.0514641	0.0245008	0.0643639	0.0528708	0.0405729	0.0487554	0.107887	0.0505006	0.138269	0.123784	10	13	41	18	23	6	-0.542093	1.88504	2.53505	2.81767	2.73598	1.46049	2.10253	0.593512	0.070595	0.0165224	0.0304401	0.00895006	0.154695	0.0823551	0.789689	0.308356	0.111209	0.0894756
Ea	25	0.562958	0.557708	0.516487	0.533664	0.505285	0.530592	0.926088	.	0.946822	n.s.	0.994245	n.s.	0.0177797	0.0438382	0.0558203	0.0420645	0.0614983	0.0417475	0.0323723	0.0801159	0.108788	0.0801357	0.123033	0.0819592	10	13	38	15	23	6	-0.391913	1.47484	2.96663	1.29519	2.71907	1.68875	0.151968	0.700089	0.152691	0.00565856	0.223597	0.0114278	0.0999426	0.882446	0.855125	0.428519	0.0582499	0.358883
Ep	26	0.734382	0.745033	0.70989	0.712829	0.707973	0.71879	0.952831	.	0.993188	n.s.	1.00836	n.s.	0.014442	0.0356609	0.0463403	0.0327661	0.0540244	0.0112487	0.0201571	0.0487853	0.0657076	0.0467324	0.077138	0.0163015	10	13	38	15	23	6	0.977701	2.47428	2.47216	2.4066	2.8288	0.344686	-0.61917	0.342213	0.0205941	0.0187544	0.0285818	0.00871169	0.732343	0.543205	0.562677	0.143335	0.121215	0.0894333
Ca	27	0.571933	0.576493	0.556396	0.550295	0.560375	0.598342	0.96514	n.s.	1.01832	n.s.	1.08731	n.s.	0.023822	0.026739	0.0531043	0.0336883	0.0630769	0.127584	0.042693	0.0472741	0.0960713	0.062239	0.113785	0.222113	10	13	38	15	23	6	0.431408	2.29193	1.06745	-0.4153	1.76798	-0.639275	-0.909866	0.67068	0.0303129	0.293697	0.694493	0.0843907	0.526812	0.402507	0.849528	0.188373	0.458902	0.765521
Cp	28	0.768146	0.801961	0.773376	0.759619	0.782348	0.788333	0.964356	n.s.	1.02992	n.s.	1.0378	n.s.	0.0211774	0.0353665	0.0469759	0.0352943	0.0520138	0.0545547	0.0282587	0.0449481	0.061141	0.0472376	0.0672069	0.072086	10	13	38	15	23	6	2.84707	3.16246	1.34123	0.559975	2.30131	-1.60444	-1.19323	0.00996155	0.00402139	0.1891	0.592913	0.0291447	0.117378	0.273045	0.113562	0.0873052	0.341161	0.684673
D	29	0.845693	0.861229	0.890668	0.893647	0.888725	0.86681	1.03418	n.s.	0.994493	n.s.	0.96997	n.s.	0.0293086	0.0481299	0.0517436	0.0317095	0.062073	0.0919154	0.0355227	0.0569599	0.0584775	0.0360746	0.0706041	0.110457	10	13	38	15	23	6	0.95602	-2.07014	-1.47881	-0.140131	-1.86692	0.321355	0.69874	0.350407	0.0514223	0.149454	0.892928	0.0751519	0.749883	0.513242	0.563204	0.255643	0.289275	0.902229
P4	30	0.653565	0.698922	0.795594	0.792216	0.797797	0.834458	1.13832	*	1.00704	n.s.	1.05332	n.s.	0.0236284	0.0710918	0.0623383	0.0655463	0.0615531	0.0469221	0.0370569	0.104028	0.0788699	0.0841168	0.0779925	0.0590422	10	11	38	15	23	5	1.99809	-3.41603	-3.95759	-4.5184	-4.07889	-0.262749	-1.56693	0.0681698	0.00264832	0.000973613	0.000759907	0.00101992	0.794622	0.149073	0.228569	0.0772291	0.0212965	0.0147422
ABalaa	31	0.0812994	0.0937504	0.0989798	0.0949414	0.101614	0.08084	1.05578	n.s.	1.07028	n.s.	0.851473	n.s.	0.0162073	0.025809	0.0290624	0.0235882	0.0323737	0.017588	0.204337	0.280589	0.295551	0.252591	0.322059	0.228444	10	13	38	15	23	5	1.41428	-0.126721	-0.799177	1.21393	-0.61011	-0.733861	1.41752	0.17241	0.900191	0.430486	0.250463	0.547706	0.467858	0.189017	0.382884	0.990986	0.558378	0.379609
ABalap	32	0.166196	0.157074	0.155178	0.1709	0.144925	0.136555	0.987929	n.s.	0.848007	n.s.	0.799033	n.s.	0.0159531	0.0208697	0.0331569	0.0281725	0.032641	0.0417826	0.0983894	0.13542	0.215075	0.167595	0.227675	0.321275	10	13	38	15	23	5	-1.18803	-1.48731	1.35985	1.04895	0.239963	2.60756	1.71284	0.248085	0.149223	0.183001	0.34422	0.811819	0.0135741	0.144411	0.466181	0.426121	0.333616	0.457388
ABalpa	33	0.135832	0.125739	0.133772	0.125885	0.138915	0.121264	1.06388	n.s.	1.1035	n.s.	0.96329	n.s.	0.0176802	0.0236714	0.0353414	0.0320935	0.0370824	0.0262836	0.133416	0.191879	0.26593	0.259191	0.269845	0.227584	10	13	38	15	23	5	-1.17041	-0.0138359	-1.29895	0.332379	-0.921578	-1.14963	0.321332	0.254951	0.989069	0.202865	0.749805	0.363783	0.258546	0.755834	0.473876	0.990986	0.355014	0.808124
ABalpp	34	0.297755	0.27978	0.262476	0.261058	0.263401	0.256332	0.938151	n.s.	1.00897	n.s.	0.981894	n.s.	0.0247543	0.0342875	0.0397757	0.0311802	0.045165	0.0387678	0.0852148	0.124908	0.152537	0.121428	0.173332	0.158803	10	13	38	15	23	5	-1.45934	1.50259	1.22383	1.18582	1.50574	-0.189073	0.247275	0.159305	0.145699	0.230273	0.276798	0.145212	0.851102	0.813168	0.368124	0.426121	0.383788	0.403542
ABaraa	35	0.205601	0.209819	0.199499	0.207821	0.194071	0.184895	0.950813	n.s.	0.933837	n.s.	0.889684	n.s.	0.0199415	0.0436992	0.0450824	0.0406865	0.0478196	0.0349315	0.0994162	0.212276	0.227465	0.199039	0.24908	0.198372	10	13	38	15	23	5	0.30875	0.124575	1.00342	1.26057	0.729076	0.949334	1.21781	0.761126	0.901864	0.32457	0.238633	0.473856	0.349278	0.258119	0.873576	0.990986	0.478602	0.367419
ABarap	36	0.374757	0.378887	0.351915	0.363857	0.344127	0.333258	0.928812	n.s.	0.945775	n.s.	0.915904	n.s.	0.0220266	0.0470457	0.0620333	0.0425232	0.0718368	0.0361529	0.0602452	0.126556	0.177433	0.118816	0.21102	0.113907	10	13	38	15	23	5	0.279242	0.8814	1.74982	2.1962	1.63688	1.06236	1.56566	0.783264	0.386671	0.0894135	0.0539916	0.1131	0.295194	0.155823	0.886655	0.708219	0.252366	0.119027
ABarpa	37	0.322681	0.2829	0.283649	0.288516	0.280476	0.231718	1.00265	n.s.	0.972134	n.s.	0.803137	n.s.	0.0257345	0.0417041	0.0632571	0.0499543	0.0715196	0.0382861	0.081746	0.150251	0.224479	0.176028	0.257765	0.173489	10	13	38	15	23	5	-2.81281	-0.324107	0.128475	2.47705	-0.0484343	0.40776	2.64958	0.0106753	0.748453	0.898532	0.0385268	0.961672	0.68588	0.0264949	0.114092	0.958485	0.908919	0.0971195
ABarpp	38	0.498064	0.462293	0.456074	0.462604	0.451815	0.391519	0.986546	n.s.	0.976677	n.s.	0.846336	n.s.	0.0312513	0.0544503	0.0715004	0.0568531	0.0805794	0.0407643	0.0643142	0.120048	0.157805	0.124946	0.180285	0.109324	10	13	38	15	23	5	-1.98197	-0.0147528	0.463825	2.98969	0.326623	0.483575	3.03709	0.0616305	0.988343	0.645843	0.0138289	0.746448	0.63164	0.0129466	0.219559	0.990986	0.762369	0.0740117
ABplaa	39	0.219237	0.249288	0.225459	0.229635	0.222735	0.219925	0.904412	n.s.	0.969949	n.s.	0.957713	n.s.	0.0283639	0.0397353	0.0305089	0.035608	0.0271829	0.0403254	0.13261	0.162461	0.13621	0.157647	0.123368	0.192528	10	13	38	15	23	5	2.11483	1.36929	2.14262	1.38931	1.97245	0.638924	0.479718	0.0466171	0.183388	0.0456883	0.206134	0.0649501	0.528821	0.647809	0.189798	0.455849	0.192746	0.338899
ABplap	40	0.381063	0.424113	0.377022	0.374741	0.378509	0.35718	0.888965	*	1.01006	n.s.	0.953138	n.s.	0.0265419	0.039391	0.0381323	0.0432481	0.0353464	0.0187993	0.0713934	0.0946648	0.101806	0.117332	0.0943983	0.0552641	10	13	38	15	23	5	3.12473	3.16039	3.4604	4.85532	3.75085	-0.281666	1.25635	0.00517976	0.00398276	0.00213993	0.000216898	0.0012371	0.780451	0.226829	0.0885739	0.0873052	0.0267491	0.00701304
ABplpa	41	0.448454	0.459042	0.426795	0.418881	0.431957	0.431209	0.929752	n.s.	1.03121	n.s.	1.02943	n.s.	0.0124266	0.0358714	0.0533365	0.0479379	0.0570217	0.0326053	0.0284027	0.079647	0.125792	0.11635	0.133443	0.0793945	10	13	38	15	23	5	0.989827	2.52895	1.74707	1.57673	2.4457	-0.76182	-0.644525	0.337429	0.0179788	0.0897899	0.15345	0.0202883	0.451487	0.53331	0.560197	0.136014	0.252366	0.27063
ABplpp	42	0.614876	0.625927	0.598592	0.597562	0.599263	0.5815	0.956328	n.s.	1.00285	n.s.	0.97312	n.s.	0.0273877	0.0441687	0.062475	0.0632129	0.0634061	0.031126	0.0456553	0.0719223	0.105057	0.107548	0.106957	0.0562034	10	13	38	15	23	5	0.736612	1.38993	1.47936	2.39593	1.7193	-0.0809741	0.748781	0.469807	0.176817	0.148726	0.0364857	0.0960167	0.935998	0.465844	0.686642	0.453309	0.289275	0.0971195
ABpraa	43	0.493535	0.487168	0.48934	0.485519	0.491831	0.445381	1.00446	n.s.	1.013	n.s.	0.91733	n.s.	0.0310018	0.0475279	0.0753707	0.0461968	0.0904403	0.0279153	0.0643861	0.0994356	0.155039	0.0967352	0.185883	0.0658111	10	13	38	15	23	5	-0.387548	0.0928007	-0.202663	2.30167	-0.120755	-0.282907	2.32461	0.702334	0.926795	0.84061	0.039048	0.904606	0.778941	0.0387423	0.855125	0.990986	0.870454	0.0971195
ABprap	44	0.684663	0.670329	0.661952	0.658676	0.664089	0.622432	0.987504	n.s.	1.00822	n.s.	0.944974	n.s.	0.0308449	0.0507033	0.0835388	0.0545017	0.0991694	0.0330372	0.0461775	0.077094	0.127031	0.0841235	0.150955	0.0557315	10	13	38	15	23	5	-0.837543	0.585751	0.249527	2.34822	0.428923	-0.216422	1.77633	0.412128	0.563122	0.804463	0.0378417	0.670617	0.829907	0.101489	0.625603	0.828259	0.862616	0.0971195
ABprpa	45	0.724284	0.688696	0.66503	0.682803	0.653439	0.513578	0.965637	n.s.	0.956995	n.s.	0.752161	n.s.	0.0324654	0.0602689	0.0563992	0.0416927	0.0623509	0.108043	0.0459447	0.0891945	0.0853649	0.0620788	0.0964567	0.220893	10	13	38	15	23	5	-1.8142	0.296392	1.66491	3.42508	1.24193	1.73963	3.41847	0.0853628	0.769852	0.108046	0.0187891	0.228851	0.0904807	0.0230519	0.249302	0.970682	0.256457	0.0828428
ABprpp	46	0.888208	0.863378	0.835359	0.851778	0.824652	0.688132	0.967548	n.s.	0.968154	n.s.	0.807878	n.s.	0.0190493	0.049962	0.0452713	0.0321145	0.0498689	0.121244	0.0219831	0.0589809	0.0545503	0.0383314	0.0611299	0.185003	10	13	38	15	23	5	-1.64331	0.718368	2.23534	3.13136	1.78659	2.03958	2.98337	0.119592	0.480864	0.0345668	0.0296148	0.0898069	0.0487836	0.0383067	0.303375	0.772513	0.172834	0.0894756
MSaa	47	0.32154	0.289131	0.282925	0.267562	0.292277	0.240312	0.978536	n.s.	1.09237	n.s.	0.898153	n.s.	0.0227341	0.0340206	0.0559771	0.0324347	0.0653005	0.039221	0.0724715	0.119928	0.199188	0.123388	0.225848	0.171369	10	13	37	14	23	5	-2.73205	1.68339	-0.189891	2.45116	0.470854	-1.53117	1.3928	0.0125968	0.104941	0.850528	0.046811	0.640659	0.13498	0.212473	0.11967	0.374455	0.875543	0.108111
MSap	48	0.44951	0.440098	0.428866	0.411163	0.439642	0.375539	0.974478	n.s.	1.06926	n.s.	0.913358	n.s.	0.021438	0.0384632	0.0689265	0.0462782	0.0786625	0.0419231	0.0488843	0.0890776	0.161804	0.114564	0.180869	0.117216	10	13	37	14	23	5	-0.74463	1.77152	0.0233321	2.99285	0.721725	-1.38629	1.58606	0.465409	0.0888045	0.981524	0.0209469	0.474863	0.174431	0.152424	0.686077	0.351182	0.981524	0.0829289
MSpa	49	0.479524	0.466102	0.438407	0.440403	0.437192	0.421074	0.940582	n.s.	0.992709	n.s.	0.956112	n.s.	0.0318992	0.0451658	0.0581162	0.0284034	0.0710353	0.0480665	0.0681857	0.0987646	0.133458	0.0656458	0.164247	0.11986	10	13	37	14	23	5	-0.834553	1.7545	1.4903	1.80981	1.75791	0.192931	0.847858	0.41341	0.0946938	0.14553	0.113786	0.0901055	0.848255	0.434954	0.625603	0.366149	0.289275	0.216416
MSpp	50	0.668075	0.640441	0.624236	0.63519	0.617568	0.595056	0.974697	n.s.	0.972257	n.s.	0.936816	n.s.	0.0271731	0.0443306	0.0616317	0.0396752	0.0718518	0.0688131	0.0416906	0.0705501	0.0993986	0.0635773	0.117611	0.121424	10	13	37	14	23	5	-1.84225	0.32342	1.18016	1.36952	1.01715	0.960071	1.233	0.0801898	0.749161	0.246215	0.225689	0.317403	0.343645	0.272539	0.249302	0.958485	0.405435	0.358883
Caa	51	0.520648	0.51836	0.485784	0.479867	0.489386	0.542552	0.937156	n.s.	1.01984	n.s.	1.13063	n.s.	0.024413	0.0382643	0.062084	0.0304437	0.0756553	0.166794	0.048062	0.0754957	0.128665	0.0645748	0.156273	0.322796	10	11	37	14	23	5	-0.164816	2.72656	1.48251	-0.320511	2.11477	-0.536248	-0.835404	0.871017	0.0134679	0.148044	0.763924	0.0437681	0.595555	0.449458	0.893532	0.13019	0.289275	0.814068
Cap	52	0.662854	0.674897	0.641467	0.631976	0.647506	0.687265	0.950466	n.s.	1.02457	n.s.	1.08749	n.s.	0.0279689	0.0357508	0.0540331	0.0311414	0.064555	0.132748	0.0432495	0.0541761	0.0848187	0.0501562	0.100831	0.202811	10	11	36	14	22	5	0.863692	3.15172	1.56681	-0.20497	2.38007	-0.965602	-0.922295	0.398747	0.00501754	0.127465	0.847007	0.0251489	0.341438	0.406712	0.614286	0.0873052	0.278829	0.883437
Cpa	53	0.703421	0.752003	0.718349	0.710649	0.723035	0.72722	0.955248	n.s.	1.01743	n.s.	1.02332	n.s.	0.0294411	0.0423361	0.0606341	0.0386418	0.0712254	0.0671782	0.0429005	0.0574707	0.084978	0.0553463	0.0995796	0.0969956	10	12	37	14	23	5	3.16213	2.58452	1.50607	0.764091	2.1339	-0.684759	-0.521634	0.00502182	0.0167139	0.141774	0.476973	0.0421317	0.498046	0.624285	0.0885739	0.134281	0.289275	0.600862
Cpp	54	0.84638	0.889762	0.870731	0.868057	0.872433	0.883538	0.978611	n.s.	1.00504	n.s.	1.01783	n.s.	0.0168809	0.0230992	0.0364954	0.0423014	0.0332314	0.0223831	0.0204435	0.0265511	0.0422045	0.0496013	0.0385233	0.0266001	10	11	36	14	22	5	4.94375	1.63459	1.74427	0.510411	2.05811	-0.327972	-1.02521	0.000101425	0.117152	0.0923123	0.623454	0.0494843	0.745897	0.322896	0.00867187	0.384613	0.252366	0.703198
ABalaaa	55	0.0856219	0.0841579	0.0897037	0.0939039	0.0869037	0.0773873	1.0659	n.s.	0.925453	n.s.	0.824112	n.s.	0.014174	0.021286	0.0253489	0.0324143	0.019719	0.0184072	0.16968	0.258678	0.284603	0.35135	0.229607	0.252724	10	11	35	14	21	4	-0.187025	-0.903963	-0.355351	0.603417	-0.718674	0.723694	1.30675	0.853791	0.37563	0.726224	0.567677	0.48076	0.477874	0.22358	0.893532	0.702792	0.811498	0.671455
ABalaap	56	0.189852	0.193612	0.1916	0.202932	0.184044	0.168855	0.989604	n.s.	0.906926	n.s.	0.832076	n.s.	0.0182968	0.0299241	0.0349407	0.0345335	0.0339183	0.0253827	0.0987831	0.158069	0.183666	0.173212	0.186488	0.159717	10	11	35	14	21	4	0.350802	-0.722079	0.819877	1.58991	0.186657	1.59649	2.17157	0.730106	0.477609	0.420768	0.160497	0.853872	0.121741	0.0688801	0.855125	0.772513	0.558378	0.273127
ABalapa	57	0.141996	0.143827	0.129751	0.1492	0.116786	0.0857209	0.902131	n.s.	0.782747	n.s.	0.574538	n.s.	0.0200895	0.0186735	0.0389544	0.0259487	0.0412397	0.0389811	0.145016	0.132783	0.302368	0.177025	0.357327	0.483166	10	11	35	14	21	4	0.215772	-0.601393	2.54743	2.86416	1.62479	2.85299	3.06844	0.831533	0.553493	0.0162868	0.053325	0.112893	0.00742857	0.0400645	0.893532	0.828259	0.111209	0.119027
ABalapp	58	0.263218	0.26471	0.249828	0.270605	0.235976	0.196212	0.943778	n.s.	0.87203	n.s.	0.725088	.	0.0195131	0.0227563	0.0415541	0.029115	0.0433684	0.0247837	0.0759862	0.0879207	0.167519	0.109514	0.185971	0.134205	10	11	35	14	21	4	0.161639	-0.568243	2.45816	4.83583	1.51568	2.82642	5.08411	0.873302	0.575376	0.0199622	0.00478026	0.139509	0.00793498	0.00271788	0.893532	0.828259	0.121215	0.0463685
ABalpaa	59	0.0877619	0.0863	0.10162	0.0883717	0.110452	0.116947	1.17752	n.s.	1.24986	n.s.	1.32336	n.s.	0.0171338	0.0161099	0.0338707	0.0306162	0.033708	0.0411595	0.200111	0.190916	0.335688	0.352634	0.308815	0.373946	10	11	35	14	21	4	-0.200894	-0.217718	-2.73998	-1.44937	-2.04047	-2.00682	-1.29028	0.842972	0.829805	0.010264	0.234155	0.048605	0.053905	0.266483	0.893532	0.982218	0.0855331	0.36634
ABalpap	60	0.190334	0.1682	0.201103	0.178875	0.215922	0.214486	1.19562	n.s.	1.20711	n.s.	1.19909	n.s.	0.0252727	0.033821	0.0584111	0.0529559	0.0583172	0.08481	0.1361	0.205646	0.292528	0.301336	0.2733	0.420123	10	11	35	14	21	4	-1.70843	-0.611969	-2.92641	-1.06129	-2.31814	-1.94647	-0.796599	0.104407	0.54677	0.00653292	0.358934	0.0274868	0.0610678	0.47372	0.287962	0.828259	0.0635145	0.465772
[truncated: 142 more rows]
[truncated: 7 more columns]

## Sheet: pDV
	Order	WT.mean	C.mean	EQ.mean	EA.mean	ED.mean	INV.mean	EQ.over.C	EQ.C.sign	ED.over.EA	ED.EA.sign	INV.over.EA	INV.EA.sign	WT.sd	C.sd	EQ.sd	EA.sd	ED.sd	INV.sd	WT.vc	C.vc	EQ.vc	EA.vc	ED.vc	INV.vc	WT.n	C.n	EQ.n	EA.n	ED.n	INV.n	C.vs.WT.t.stat	C.vs.EA.t.stat	C.vs.ED.t.stat	C.vs.INV.t.stat	C.vs.EQ.t.stat	EA.vs.ED.t.stat	EA.vs.INV.t.stat	C.vs.WT.p.val	C.vs.EA.p.val	C.vs.ED.p.val	C.vs.INV.p.val	C.vs.EQ.p.val	EA.vs.ED.p.val	EA.vs.INV.p.val	C.vs.WT.p.adj	C.vs.EA.p.adj	C.vs.ED.p.adj	C.vs.INV.p.adj
[truncated: 202 more rows]
[truncated: 7 more columns]

[truncated: 8 more sheets: pLR, aMean - deviation, aAP, aDV, aLR, V.rel, sisterRatio, asynchrony]
