# Supplementary material for: Physically asymmetric division of the C. elegans zygote ensures invariably successful embryogenesis
Source: bioRxiv preprint, doi:10.1101/2021.01.04.425207, version 1 (2021-01-04)
Supplement: Supplementary File 7 [file 425207_file32.xlsx]

## Sheet: four
variable	inclusion.frequency	oneSE.model.coef
EMS.EndTime	0	0
EMS.pOV	0	0
EMS.pAP	0	0
EMS.pDV	0.088	0.696775
EMS.pLR	0.004	0
EMS.aMean	0	0
EMS.aAP	0	0
EMS.aDV	0.076	-0.383506
EMS.aLR	0.004	0
ABp.EndTime	0.024	0.0693413
ABp.pOV	0.052	0.299925
ABp.pAP	0.068	0.322522
ABp.pDV	0	0
ABp.pLR	0	0
ABp.aMean	0.012	0
ABp.aAP	0.04	0.180631
ABp.aDV	0	0
ABp.aLR	0	0

## Sheet: eight
variable	inclusion.frequency	oneSE.model.coef
MS.LifeTime	0	0
MS.EndTime	0	0
MS.netdis	0	0
MS.totdis	0	0
MS.pOV	0	0
MS.pAP	0	0
MS.pDV	0	0
MS.pLR	0	0
MS.aMean	0.708	-0.22374
MS.aAP	0	0
MS.aDV	0	0
MS.aLR	0	0
E.LifeTime	0	0
E.EndTime	0	0
E.netdis	0	0
E.totdis	0	0
E.pOV	0	0
E.pAP	0	0
E.pDV	0	0
E.pLR	0	0
E.aMean	0	0
E.aAP	0	0
E.aDV	0	0
E.aLR	0	0
C.LifeTime	0	0
C.EndTime	0	0
C.netdis	0	0
C.totdis	0	0
C.pOV	0	0
C.pAP	0	0
C.pDV	0	0
C.pLR	0	0
C.aMean	0	0
C.aAP	0	0
C.aDV	0	0
C.aLR	0	0
ABpr.LifeTime	0	0
ABpr.EndTime	0	0
ABpr.netdis	0	0
ABpr.totdis	0	0
ABpr.pOV	0	0
ABpr.pAP	0	0
ABpr.pDV	0	0
ABpr.pLR	0	0
ABpr.aMean	0	0
ABpr.aAP	0	0
ABpr.aDV	0.876	0.424915
ABpr.aLR	0	0
ABpl.LifeTime	0	0
ABpl.EndTime	0	0
ABpl.netdis	0	0
ABpl.totdis	0	0
ABpl.pOV	0	0
ABpl.pAP	0	0
ABpl.pDV	0	0
ABpl.pLR	0	0
ABpl.aMean	0	0
ABpl.aAP	0	0
ABpl.aDV	0.528	0.192061
ABpl.aLR	0	0
ABar.LifeTime	0	0
ABar.EndTime	0	0
ABar.netdis	0	0
ABar.totdis	0	0
ABar.pOV	0	0
ABar.pAP	0	0
ABar.pDV	0.528	-0.0418845
ABar.pLR	0	0
ABar.aMean	0	0
ABar.aAP	0	0
ABar.aDV	0	0
ABar.aLR	0	0

## Sheet: fifteen
variable	inclusion.frequency	oneSE.model.coef
MSp.LifeTime	0	0
MSp.EndTime	0	0
MSp.netdis	0	0
MSp.totdis	0	0
MSp.pOV	0	0
MSp.pAP	0	0
MSp.pDV	0	0
MSp.pLR	0	0
MSp.aMean	0	0
MSp.aAP	0	0
MSp.aDV	0	0
MSp.aLR	0	0
MSa.LifeTime	0	0
MSa.EndTime	0	0
MSa.netdis	0	0
MSa.totdis	0	0
MSa.pOV	0	0
MSa.pAP	0	0
MSa.pDV	0	0
MSa.pLR	0	0
MSa.aMean	0	0
MSa.aAP	0	0
MSa.aDV	0	0
MSa.aLR	0	0
Ep.LifeTime	0	0
Ep.EndTime	0	0
Ep.netdis	0	0
Ep.totdis	0	0
Ep.pOV	0	0
Ep.pAP	0	0
Ep.pDV	0	0
Ep.pLR	0	0
Ep.aMean	0	0
Ep.aAP	0	0
Ep.aDV	0	0
Ep.aLR	0	0
Ea.LifeTime	0	0
Ea.EndTime	0	0
Ea.netdis	0	0
Ea.totdis	0	0
Ea.pOV	0	0
Ea.pAP	0	0
Ea.pDV	0	0
Ea.pLR	0	0
Ea.aMean	0	0
Ea.aAP	0	0
Ea.aDV	0	0
Ea.aLR	0	0
Cp.LifeTime	0	0
Cp.EndTime	0	0
Cp.netdis	0	0
Cp.totdis	0	0
Cp.pOV	0	0
Cp.pAP	0	0
Cp.pDV	0	0
Cp.pLR	0	0
Cp.aMean	0	0
Cp.aAP	0	0
Cp.aDV	0	0
Cp.aLR	0	0
Ca.LifeTime	0	0
Ca.EndTime	0	0
Ca.netdis	0.988	-0.564006
Ca.totdis	0	0
Ca.pOV	0	0
Ca.pAP	0	0
Ca.pDV	0	0
Ca.pLR	0	0
Ca.aMean	0	0
Ca.aAP	0	0
Ca.aDV	0	0
Ca.aLR	0	0
ABprp.LifeTime	0	0
ABprp.netdis	0	0
ABprp.totdis	0	0
ABprp.pOV	0	0
ABprp.pAP	0	0
ABprp.pDV	0	0
ABprp.pLR	0	0
ABprp.aMean	0	0
ABprp.aAP	0.008	0.0105531
ABprp.aDV	0	0
ABprp.aLR	0	0
ABpra.LifeTime	0	0
ABpra.netdis	0	0
ABpra.totdis	0	0
ABpra.pOV	0	0
ABpra.pAP	0	0
ABpra.pDV	0	0
ABpra.pLR	0	0
ABpra.aMean	0	0
ABpra.aAP	0	0
ABpra.aDV	0	0
ABpra.aLR	0	0
ABplp.LifeTime	0	0
ABplp.EndTime	0	0
ABplp.netdis	0	0
ABplp.totdis	0	0
ABplp.pOV	0	0
ABplp.pAP	0	0
ABplp.pDV	0	0
ABplp.pLR	0	0
ABplp.aMean	0	0
ABplp.aAP	0	0
ABplp.aDV	0	0
ABplp.aLR	0	0
ABpla.LifeTime	0	0
ABpla.netdis	0	0
ABpla.totdis	0	0
ABpla.pOV	0	0
ABpla.pAP	0	0
ABpla.pDV	0	0
ABpla.pLR	0	0
ABpla.aMean	0	0
ABpla.aAP	0	0
ABpla.aDV	0	0
ABpla.aLR	0	0
ABarp.LifeTime	0	0
ABarp.netdis	0	0
ABarp.totdis	0	0
ABarp.pOV	0	0
ABarp.pAP	0	0
ABarp.pDV	0	0
ABarp.pLR	0	0
ABarp.aMean	0	0
ABarp.aAP	0	0
ABarp.aDV	0	0
ABarp.aLR	0.032	0.066472
ABara.LifeTime	0	0
ABara.netdis	0	0
ABara.totdis	0	0
ABara.pOV	0.92	-0.38343
ABara.pAP	0	0
ABara.pDV	0.992	-0.580283
ABara.pLR	0	0
ABara.aMean	0	0
ABara.aAP	0	0
ABara.aDV	0	0
ABara.aLR	0	0
ABalp.LifeTime	0	0
ABalp.netdis	0	0
ABalp.totdis	0	0
ABalp.pOV	0	0
ABalp.pAP	0	0
ABalp.pDV	0	0
ABalp.pLR	0	0
ABalp.aMean	0	0
ABalp.aAP	0	0
ABalp.aDV	0	0
ABalp.aLR	0	0

## Sheet: twentyeight
variable	inclusion.frequency	oneSE.model.coef
MSpp.LifeTime	0	0
MSpp.EndTime	0	0
MSpp.netdis	0	0
MSpp.totdis	0	0
MSpp.pOV	0	0
MSpp.pAP	0	0
MSpp.pDV	0	0
MSpp.pLR	0	0
MSpp.aMean	0	0
MSpp.aAP	0	0
MSpp.aDV	0	0
MSpp.aLR	0	0
MSpa.LifeTime	0	0
MSpa.EndTime	0	0
MSpa.netdis	0	0
MSpa.totdis	0	0
MSpa.pOV	0	0
MSpa.pAP	0	0
MSpa.pDV	0	0
MSpa.pLR	0	0
MSpa.aMean	0	0
MSpa.aAP	0	0
MSpa.aDV	0	0
MSpa.aLR	0	0
MSap.LifeTime	0	0
MSap.EndTime	0	0
MSap.netdis	0	0
MSap.totdis	0	0
MSap.pOV	0	0
MSap.pAP	0	0
MSap.pDV	0	0
MSap.pLR	0	0
MSap.aMean	0	0
MSap.aAP	0	0
MSap.aDV	0	0
MSap.aLR	0	0
MSaa.LifeTime	0	0
MSaa.EndTime	0	0
MSaa.netdis	0	0
MSaa.totdis	0	0
MSaa.pOV	0	0
MSaa.pAP	0	0
MSaa.pDV	0	0
MSaa.pLR	0	0
MSaa.aMean	0	0
MSaa.aAP	0	0
MSaa.aDV	0	0
MSaa.aLR	0	0
Ep.LifeTime	0	0
Ep.EndTime	0	0
Ep.netdis	0	0
Ep.totdis	0	0
Ep.pOV	0	0
Ep.pAP	0	0
Ep.pDV	0	0
Ep.pLR	0	0
Ep.aMean	0	0
Ep.aAP	0	0
Ep.aDV	0	0
Ep.aLR	0	0
Ea.LifeTime	0	0
Ea.EndTime	0	0
Ea.netdis	0	0
Ea.totdis	0	0
Ea.pOV	0	0
Ea.pAP	0	0
Ea.pDV	0	0
Ea.pLR	0	0
Ea.aMean	0	0
Ea.aAP	0	0
Ea.aDV	0	0
Ea.aLR	0	0
D.LifeTime	0	0
D.EndTime	0	0
D.netdis	0	0
D.totdis	0	0
D.pOV	0	0
D.pAP	0	0
D.pDV	0	0
D.pLR	0	0
D.aMean	0	0
D.aAP	0	0
D.aDV	0	0
D.aLR	0	0
Cpp.LifeTime	0	0
Cpp.EndTime	0	0
Cpp.netdis	0	0
Cpp.totdis	0	0
Cpp.pOV	0	0
Cpp.pAP	0	0
Cpp.pDV	0	0
Cpp.pLR	0	0
Cpp.aMean	0	0
Cpp.aAP	0	0
Cpp.aDV	0	0
Cpp.aLR	0	0
Cpa.LifeTime	0	0
Cpa.EndTime	0	0
Cpa.netdis	0	0
Cpa.totdis	0	0
Cpa.pOV	0	0
Cpa.pAP	0	0
Cpa.pDV	0	0
Cpa.pLR	0	0
Cpa.aMean	0	0
Cpa.aAP	0	0
Cpa.aDV	0	0
Cpa.aLR	0	0
Cap.LifeTime	0	0
Cap.EndTime	0	0
Cap.netdis	0	0
Cap.totdis	0	0
Cap.pOV	0	0
Cap.pAP	0	0
Cap.pDV	0	0
Cap.pLR	0.056	0.0670121
Cap.aMean	0	0
Cap.aAP	0	0
Cap.aDV	0	0
Cap.aLR	0	0
Caa.LifeTime	0.34	0.306699
Caa.EndTime	0	0
Caa.netdis	0	0
Caa.totdis	0.004	0
Caa.pOV	0	0
Caa.pAP	0	0
Caa.pDV	0	0
Caa.pLR	0	0
Caa.aMean	0	0
Caa.aAP	0	0
Caa.aDV	0	0
Caa.aLR	0	0
ABprpp.LifeTime	0	0
ABprpp.netdis	0	0
ABprpp.totdis	0	0
ABprpp.pOV	0	0
ABprpp.pAP	0	0
ABprpp.pDV	0	0
ABprpp.pLR	0	0
ABprpp.aMean	0	0
ABprpp.aAP	0	0
ABprpp.aDV	0	0
ABprpp.aLR	0	0
ABprpa.LifeTime	0	0
ABprpa.netdis	0	0
ABprpa.totdis	0	0
ABprpa.pOV	0	0
ABprpa.pAP	0	0
ABprpa.pDV	0	0
ABprpa.pLR	0	0
ABprpa.aMean	0	0
ABprpa.aAP	0	0
ABprpa.aDV	0	0
ABprpa.aLR	0	0
ABprap.LifeTime	0	0
ABprap.netdis	0	0
ABprap.totdis	0	0
ABprap.pOV	0	0
ABprap.pAP	0	0
ABprap.pDV	0	0
ABprap.pLR	0	0
ABprap.aMean	0	0
ABprap.aAP	0	0
ABprap.aDV	0	0
ABprap.aLR	0	0
ABpraa.LifeTime	0	0
ABpraa.netdis	0	0
ABpraa.totdis	0	0
ABpraa.pOV	0	0
ABpraa.pAP	0	0
ABpraa.pDV	0	0
ABpraa.pLR	0	0
ABpraa.aMean	0	0
ABpraa.aAP	0	0
ABpraa.aDV	0	0
ABpraa.aLR	0	0
ABplpp.LifeTime	0	0
ABplpp.netdis	0	0
ABplpp.totdis	0	0
ABplpp.pOV	0	0
ABplpp.pAP	0	0
ABplpp.pDV	0	0
ABplpp.pLR	0	0
ABplpp.aMean	0	0
ABplpp.aAP	0	0
ABplpp.aDV	0	0
ABplpp.aLR	0	0
ABplpa.LifeTime	0	0
ABplpa.netdis	0	0
ABplpa.totdis	0	0
ABplpa.pOV	0	0
ABplpa.pAP	0	0
ABplpa.pDV	0	0
ABplpa.pLR	0	0
ABplpa.aMean	0	0
ABplpa.aAP	0	0
ABplpa.aDV	0	0
ABplpa.aLR	0	0
ABplap.LifeTime	0	0
ABplap.netdis	0	0
ABplap.totdis	0	0
ABplap.pOV	0	0
ABplap.pAP	0	0
ABplap.pDV	0	0
ABplap.pLR	0	0
ABplap.aMean	0	0
ABplap.aAP	0	0
ABplap.aDV	0	0
ABplap.aLR	0	0
ABplaa.LifeTime	0	0
ABplaa.netdis	0	0
ABplaa.totdis	0	0
ABplaa.pOV	0	0
ABplaa.pAP	0	0
ABplaa.pDV	0	0
ABplaa.pLR	0	0
ABplaa.aMean	0	0
ABplaa.aAP	0	0
ABplaa.aDV	0	0
ABplaa.aLR	0	0
ABarpp.LifeTime	0	0
ABarpp.netdis	0	0
ABarpp.totdis	0	0
ABarpp.pOV	0	0
ABarpp.pAP	0	0
ABarpp.pDV	0	0
ABarpp.pLR	0	0
ABarpp.aMean	0	0
ABarpp.aAP	0	0
ABarpp.aDV	0	0
ABarpp.aLR	0	0
ABarpa.LifeTime	0	0
ABarpa.netdis	0	0
ABarpa.totdis	0	0
ABarpa.pOV	0	0
ABarpa.pAP	0	0
ABarpa.pDV	0	0
ABarpa.pLR	0	0
ABarpa.aMean	0	0
ABarpa.aAP	0	0
ABarpa.aDV	0	0
ABarpa.aLR	0	0
ABarap.LifeTime	0.476	-0.308109
ABarap.netdis	0	0
ABarap.totdis	0	0
ABarap.pOV	0	0
ABarap.pAP	0	0
ABarap.pDV	0.984	-0.80374
ABarap.pLR	0	0
ABarap.aMean	0	0
ABarap.aAP	0	0
ABarap.aDV	0	0
ABarap.aLR	0	0
ABaraa.LifeTime	0	0
ABaraa.netdis	0	0
ABaraa.totdis	0	0
ABaraa.pOV	0	0
ABaraa.pAP	0	0
ABaraa.pDV	0.856	-0.369239
ABaraa.pLR	0	0
ABaraa.aMean	0	0
ABaraa.aAP	0	0
ABaraa.aDV	0	0
ABaraa.aLR	0	0
ABalpp.LifeTime	0	0
ABalpp.netdis	0	0
ABalpp.totdis	0	0
ABalpp.pOV	0	0
ABalpp.pAP	0	0
ABalpp.pDV	0	0
ABalpp.pLR	0	0
ABalpp.aMean	0	0
ABalpp.aAP	0	0
ABalpp.aDV	0	0
ABalpp.aLR	0	0
ABalpa.LifeTime	0	0
ABalpa.netdis	0	0
ABalpa.totdis	0	0
ABalpa.pOV	0	0
ABalpa.pAP	0	0
ABalpa.pDV	0	0
ABalpa.pLR	0	0
ABalpa.aMean	0	0
ABalpa.aAP	0	0
ABalpa.aDV	0	0
ABalpa.aLR	0	0
ABalap.LifeTime	0	0
ABalap.netdis	0	0
ABalap.totdis	0	0
ABalap.pOV	0.236	-0.0488977
ABalap.pAP	0	0
ABalap.pDV	0	0
ABalap.pLR	0	0
ABalap.aMean	0	0
ABalap.aAP	0	0
ABalap.aDV	0	0
ABalap.aLR	0	0

## Sheet: Data-Values
embryo	Outcome	Experiment	Group	AB.rel	Size	EMS.EndTime	EMS.pOV	EMS.pAP	EMS.pDV	EMS.pLR	EMS.aMean	EMS.aAP	EMS.aDV	EMS.aLR	P4.LifeTime	P4.EndTime	P4.netdis	P4.totdis	P4.pOV	P4.pAP	P4.pDV	P4.pLR	P4.aMean	P4.aAP	P4.aDV	P4.aLR	P3.LifeTime	P3.EndTime	P3.netdis	P3.totdis	P3.pOV	P3.pDV	P3.pLR	P3.aMean	P3.aAP	P3.aDV	P3.aLR	P2.EndTime	P2.pOV	P2.pAP	P2.pDV	P2.pLR	P2.aMean	P2.aAP	P2.aDV	P2.aLR	MSpp.LifeTime	MSpp.EndTime	MSpp.netdis
EM01	hatched	meta	alive	0.506181	1537	3.816	2.44532	0.535352	0.312116	0.576179	7.97516	158.598	72.1702	78.5495	83.952	133.56	13.2685	42.1938	3.54054	0.743497	0.217515	0.667379	26.9814	163.076	93.3675	106.566	41.976	49.608	3.96468	28.6125	4.36085	0.592853	0.663397	25.5195	90.3863	172.713	82.7235	7.632	3.24739	0.815574	0.587319	0.546802	38.2009	102.538	165.323	97.5061	45.792	114.48	6.33796
EM5	hatched	meta	alive	0.507792	1540	5.634	3.66864	0.510134	0.270308	0.623177	4.33586	162.249	75.1538	80.4896	93.9	144.606	15.2012	49.0434	10.1498	0.62601	0.18791	0.816465	49.9716	155.223	114.637	92.465	39.438	50.706	3.07133	26.8924	4.61556	0.476057	0.684097	21.0126	82.921	164.937	76.7731	11.268	3.7417	0.803751	0.535803	0.639965	26.1376	107.771	161.475	84.938	45.072	112.68	5.81804
EM6	died	meta	dead	0.507645	1674.4	5.862	2.82383	0.606407	0.298043	0.512162	11.6907	156.526	76.5943	71.1001	60.574	107.47	12.4776	29.0866	6.35594	0.76508	0.152317	0.749179	72.6818	112.55	65.0052	34.7928	37.126	46.896	3.97644	25.1704	2.727	0.508872	0.627858	17.6347	76.3948	153.679	67.9227	9.77	2.53952	0.833963	0.54077	0.581197	26.872	102.199	167.198	86.1773	42.988	111.378	7.22125
EM9	died	meta	dead	0.506851	1656.7	4.58	0.868174	0.587658	0.279962	0.620451	6.06923	160.71	73.1689	80.8502	68.7	116.79	3.08161	24.4315	9.28533	0.883984	0.400832	0.411644	30.7943	149.506	64.7746	74.0108	38.93	48.09	3.61513	30.082	0.437476	0.520113	0.518407	48.6036	94.3075	163.679	105.712	9.16	2.32331	0.818761	0.559979	0.528676	26.0269	116.914	151.508	81.341	45.8	109.92	4.45038
GM13	hatched	meta	alive	0.505573	1344.15	4.385	0.537923	0.568552	0.294041	0.60099	14.0386	164.065	75.2748	95.9559	61.39	109.625	10.9932	22.8986	5.12528	0.815825	0.124146	0.536225	23.8637	159.518	71.4731	81.5734	39.465	48.235	5.35941	29.1506	4.28406	0.626783	0.459954	17.6396	102.029	157.672	71.4798	8.77	4.46037	0.777778	0.580055	0.611069	49.7295	89.7331	162.483	107.514	43.85	111.817	5.18821
GM14	hatched	meta	alive	0.507439	1328.65	4.62	0.640522	0.565439	0.280963	0.603834	37.9144	128.706	53.031	60.1787	76.23	122.43	6.11328	29.7312	7.26539	0.858641	0.172753	0.679814	45.5455	133.997	57.944	60.9485	36.96	46.2	3.76455	24.4686	1.84256	0.474013	0.564439	30.3143	86.2419	175.298	87.1781	9.24	2.4738	0.857065	0.44596	0.547455	15.4297	92.3365	135.563	45.6584	43.89	108.57	4.81668
GM18	hatched	meta	alive	0.519296	1384.99	4.62	6.82921	0.574554	0.323748	0.347904	8.71454	163.875	83.9494	75.1108	97.02	147.84	10.3817	44.9552	6.08967	0.75371	0.400556	0.681534	51.9345	141.546	116.916	115.239	41.58	50.82	4.04255	28.7387	3.95985	0.616301	0.473025	29.1395	101.467	119.175	31.7663	9.24	2.46537	0.793581	0.547733	0.49413	78.8317	111.096	126.192	136.248	48.51	115.5	8.2566
GM20	died	meta	dead	0.518121	1559.56	4.62	0.483651	0.585522	0.287474	0.599128	9.4292	157.428	73.5663	74.9638	69.3	117.81	8.1668	30.6335	3.44588	0.811891	0.219417	0.518694	73.9714	85.7144	76.2306	165.554	39.27	48.51	4.42412	32.8489	2.05182	0.529556	0.562633	24.6777	79.2312	164.684	79.2398	9.24	1.44124	0.814107	0.522505	0.487651	13.9016	97.21	160.974	72.4904	46.2	113.19	6.69089
GM21	hatched	meta	alive	0.502703	1294	4.85	1.46689	0.556647	0.305933	0.62489	12.8385	161.672	71.9778	93.2256	65.475	111.55	8.61478	27.6968	2.40514	0.756734	0.18179	0.490716	64.5956	124.264	71.4211	40.3087	38.8	46.075	3.83438	25.5765	2.20114	0.464044	0.50166	20.9727	86.4819	167.223	77.7329	7.275	3.32277	0.800511	0.528634	0.624008	49.7242	128.571	139.053	101.648	46.075	111.55	5.27103
GM22	hatched	meta	alive	0.48913	1242	4.62	3.497	0.545405	0.370895	0.6541	13.353	157.438	67.448	89.3724	57.75	106.26	5.79396	20.6094	9.32767	0.911149	0.33758	0.620535	95.7423	84.9819	60.4758	30.0327	39.27	48.51	4.52988	28.1565	5.333	0.63518	0.494219	32.3254	121.329	142.833	72.0839	9.24	3.29599	0.812093	0.573603	0.450563	30.6867	70.3961	139.205	55.9007	41.58	108.57	3.95199
GM25	died	meta	dead	0.489988	1668	2.135	3.26399	0.519835	0.255806	0.624753	10.0523	159.43	69.7366	86.6098	57.645	102.48	3.91875	23.9636	5.5878	0.851816	0.242578	0.587935	50.1403	130.833	58.9761	56.3628	38.43	44.835	3.58785	28.5979	3.29111	0.436781	0.509405	23.137	67.9833	143.451	62.4374	6.405	1.36296	0.798702	0.467201	0.497556	24.0906	104.912	123.07	37.1066	42.7	104.615	5.25388
GM3	hatched	meta	alive	0.515847	1555.5	2.125	1.66597	0.589531	0.32807	0.623697	10.658	157.684	68.4539	84.4637	68	110.5	9.19657	28.0528	4.12462	0.825373	0.215983	0.536395	32.5727	127.49	72.5812	137.292	36.125	42.5	3.99345	30.7364	2.62209	0.525437	0.453553	18.0667	87.5517	164.763	74.9702	6.375	1.90557	0.805678	0.536915	0.490918	16.7458	112.855	150.43	72.2766	48.875	110.5	8.75975
GM51	died	meta	dead	0.516325	1318	4.85	0.807801	0.568875	0.29959	0.616142	16.0972	154.761	64.7617	90.2207	72.75	121.25	7.58061	33.5345	3.85179	0.793671	0.174791	0.460182	39.9729	120.625	74.0003	144.605	41.225	48.5	4.41697	29.5052	2.86685	0.474396	0.467096	17.0653	83.1791	161.194	72.5606	7.275	1.24217	0.812741	0.485092	0.473808	36.0028	84.2415	116.375	27.0928	43.65	109.125	6.85593
GM54	hatched	meta	alive	0.494898	1372	2.02	3.08261	0.567898	0.337471	0.692766	63.9675	103.255	53.2618	39.8366	60.6	105.04	7.29822	29.9983	7.17057	0.819047	0.259747	0.768511	85.7487	92.5021	118.097	151.772	36.36	44.44	6.53566	34.6442	3.80646	0.542993	0.583068	31.4748	59.4867	135.868	61.5432	8.08	3.26916	0.760095	0.486292	0.492227	49.9906	59.4463	114.876	41.2861	45.0548	111.383	6.44233
MM4	hatched	meta	alive	0.526073	1430.6	10.164	2.45191	0.554693	0.312172	0.592043	17.6885	152.412	70.5854	76.6507	83.16	132.132	10.2633	29.9025	3.27812	0.748563	0.13972	0.527133	115.882	79.6545	94.0998	11.145	40.656	48.972	5.56883	39.1538	2.82175	0.430581	0.509864	18.9481	83.2204	163.155	74.6536	8.316	1.58514	0.805599	0.529402	0.507047	10.1444	98.7285	157.164	69.0714	42.504	108.108	3.9243
MM5	died	meta	dead	0.520025	1598	3.816	4.10037	0.599438	0.227238	0.46749	9.96417	156.621	71.5453	76.1566	78.228	125.928	11.7538	33.8399	4.37784	0.83124	0.236712	0.560767	38.0812	117.809	62.6366	139.087	40.068	47.7	4.01394	29.0059	5.22074	0.61563	0.379242	14.3914	105.205	146.009	60.4147	7.632	5.35366	0.83521	0.589142	0.361641	14.4231	93.0766	160.843	71.1112	45.792	114.48	5.96034
PM01	hatched	meta	alive	0.510621	1224	5.08	1.08585	0.568453	0.313754	0.581908	13.3846	156.117	66.3157	87.0985	96.52	147.32	12.1774	33.1705	3.47409	0.771698	0.180758	0.637458	34.6335	134.304	86.1945	135.444	40.64	50.8	5.57755	25.196	3.42144	0.591775	0.569597	29.8434	111.604	156.013	80.0753	10.16	1.27633	0.824201	0.524865	0.527432	12.3672	88.7289	152	62.034	48.26	116.84	7.59913
PM02	died	meta	dead	0.513974	1467	2.405	3.37542	0.542831	0.324534	0.692341	6.57424	173.02	83.8097	86.7876	79.365	127.465	6.34351	32.514	4.12091	0.825931	0.270099	0.544401	23.5349	144.02	81.4028	124.622	40.885	48.1	3.32319	31.5571	1.74961	0.502891	0.518599	13.621	91.5771	160.756	70.826	7.215	1.86502	0.786552	0.490854	0.49765	8.63252	107.573	148.986	65.3216	48.1	115.44	8.25252
PM03	died	meta	dead	0.51294	1507	4.81	0.792643	0.584861	0.269074	0.580106	1.70448	164.875	77.4389	81.7106	62.53	108.225	12.0567	23.8874	6.63794	0.768663	0.176788	0.771364	74.7453	107.847	60.0801	35.8328	36.075	45.695	4.83534	25.6782	1.83322	0.539427	0.495177	11.7226	93.5528	158.369	68.6918	9.62	0.996985	0.835896	0.496248	0.505497	9.9505	99.592	156.786	69.0705	48.1	113.035	8.38306
PM06	hatched	meta	alive	0.500701	1426	4.85	2.96378	0.53695	0.330673	0.652389	16.693	152.531	77.653	65.8757	67.9	116.4	7.79426	25.269	5.74417	0.847342	0.254486	0.630726	119.798	73.9921	91.365	16.0691	38.8	48.5	3.19514	34.8713	3.68453	0.555466	0.444303	25.7451	116.205	134.995	56.4723	9.7	1.75782	0.789033	0.473949	0.498205	28.2001	127.564	126.971	58.9111	46.075	113.975	6.3299
PM07	died	meta	dead	0.500687	1456	2.5025	5.41885	0.50254	0.310982	0.464333	10.7406	159.145	80.3327	71.7045	75.075	122.623	5.95323	28.4419	5.1558	0.803599	0.316619	0.403443	95.7762	58.5921	65.0008	137.86	40.04	47.5475	5.77814	29.8925	2.29699	0.53308	0.461868	36.2021	85.0255	174.213	92.9496	7.5075	1.5149	0.817467	0.524692	0.484769	18.3329	89.699	163.494	73.4966	47.5475	117.618	8.43593
PM08	died	meta	dead	0.498284	1457	5.005	0.603984	0.567531	0.279622	0.585604	2.65812	165.58	79.8452	79.8708	87.5875	137.637	9.77782	33.7072	4.3832	0.805929	0.213285	0.427234	11.5942	161.547	77.7968	103.626	40.04	50.05	3.78582	27.3621	2.34963	0.547401	0.481676	17.8973	99.253	160.835	73.368	10.01	2.94442	0.784445	0.516083	0.441847	7.43262	106.91	148.343	64.0962	47.5475	117.618	5.39243
PM09	died	meta	dead	0.518149	1405	5.195	1.66346	0.553979	0.248311	0.604793	10.3469	163.219	73.2573	91.1026	88.315	137.667	11.5661	35.0021	3.42044	0.743873	0.173775	0.636743	41.7531	129.505	91.4688	140.456	38.9625	49.3525	5.64095	27.1071	2.51258	0.491401	0.469863	30.3321	107.552	161.156	83.3594	10.39	0.652489	0.819574	0.465177	0.526501	25.4676	95.3056	171.897	83.8925	46.755	114.29	7.09927
PM11	died	meta	dead	0.48497	1497	4.85	3.59851	0.512995	0.319744	0.606833	13.1496	163.94	89.2149	73.9604	67.9	116.4	6.92835	24.9042	8.79346	0.898623	0.318913	0.429416	46.5651	139.281	67.3242	58.2472	38.8	48.5	3.85959	28.0057	5.44437	0.638153	0.460951	14.3855	89.8806	161.554	71.5544	9.7	3.35385	0.766552	0.534674	0.484579	25.3859	102.741	166.162	84.6891	46.075	111.55	8.32938
PM13	died	meta	dead	0.517656	1331	2.655	1.29967	0.572005	0.291986	0.550758	19.9144	146.803	65.8413	68.672	79.65	124.785	7.56389	34.2723	4.67406	0.827293	0.219803	0.464628	113.704	85.6662	102.667	13.4112	37.17	45.135	6.81047	25.4693	1.69509	0.504857	0.528779	32.1826	106.661	162.817	85.915	7.965	0.803644	0.809161	0.490446	0.497397	73.804	75.3634	139.05	127.209	42.48	108.855	7.56142
PM16	hatched	meta	alive	0.485507	1242	2.425	1.7524	0.549157	0.29241	0.563667	18.7148	148.173	67.9314	68.2811	67.9	116.4	8.86712	30.0527	4.86846	0.82526	0.164515	0.5841	46.2771	124.905	92.9894	144.929	41.225	48.5	3.59736	30.0766	2.68178	0.544366	0.535908	2.32517	90.9877	149.519	59.5385	7.275	2.83434	0.806917	0.513942	0.421222	24.5626	99.0376	168.936	83.6707	43.65	109.125	9.18461
PM18	died	meta	dead	0.514706	1360	4.81	2.61581	0.539577	0.239098	0.561668	10.8694	168.09	89.038	78.1302	57.72	105.82	12.0946	31.1878	2.4626	0.770963	0.186115	0.586285	49.7034	135.398	65.6908	55.33	38.48	48.1	4.70617	29.8786	3.9413	0.585418	0.476641	17.6063	95.7063	129.982	40.5566	9.62	3.59112	0.770475	0.405711	0.517515	15.7714	85.8979	154.014	64.3883	50.505	120.25	7.32596
PM19	hatched	meta	alive	0.515432	1296	2.31	2.23866	0.542937	0.297848	0.551056	7.36224	166.987	84.99	78.0215	71.61	117.81	11.1722	31.7092	4.88111	0.788091	0.207368	0.699752	20.2033	149.503	81.9933	119.21	39.27	46.2	4.62901	31.1318	2.70096	0.588731	0.516975	7.73927	98.6898	146.37	57.8039	6.93	3.78317	0.780222	0.51636	0.407057	18.7225	89.1327	163.529	73.5528	41.58	106.26	8.31204
PM20	died	meta	dead	0.511046	1358	2.5025	5.08754	0.532686	0.359609	0.740779	13.1346	169.072	80.5508	95.4396	67.5675	112.612	4.63958	25.2555	6.68266	0.849087	0.308775	0.673872	63.702	114.065	50.9419	48.6377	37.5375	45.045	4.69835	26.2571	1.84529	0.511836	0.562235	9.98629	85.003	154.77	65.3379	7.5075	2.15895	0.788104	0.499808	0.56464	12.7037	101.622	134.603	46.9294	50.05	117.618	10.2879
PM21	died	meta	dead	0.492114	1268	2.405	1.34661	0.551665	0.286016	0.596478	15.587	153.279	76.9914	67.092	62.53	108.225	8.12754	25.8416	10.2756	0.90798	0.371122	0.37806	58.5841	95.9343	56.9413	146.275	38.48	45.695	5.09608	31.2683	2.86163	0.592518	0.534436	4.93648	95.1393	149.434	59.9617	7.215	1.75998	0.798939	0.528844	0.509544	36.3322	72.371	160.614	82.1923	45.695	108.225	7.28404
PM25	died	meta	dead	0.513889	1368	4.62	3.87551	0.508554	0.304805	0.638469	30.2904	137.362	66.9133	56.4738	85.47	136.29	10.961	38.0102	4.85857	0.715294	0.187625	0.69309	29.7475	136.834	82.0106	132.055	41.58	50.82	3.63736	32.9791	3.9196	0.443042	0.636056	6.93743	84.4311	149.12	59.7364	9.24	1.65191	0.791751	0.471041	0.497247	24.0161	80.0101	158.671	71.3564	46.2	113.19	5.82964
[truncated: 544 more columns]
